# Supplementary material for: Integration of Metabolomic and Transcriptomic Analyses Reveals the Molecular Mechanisms of Flower Color Formation in Prunus mume
Source: Plants (Basel). 2024 Apr 11;13(8):1077. doi: 10.3390/plants13081077 (PMC11054544; doi:10.3390/plants13081077)
Supplement: Supplementary file 1 [file plants-13-01077-s001.zip]

Archive with 10 entries (10 files):
- Supplementary Figures S1-S8.pdf
- Supplementary Table S1.xlsx
- Supplementary Table S2.xlsx
- Supplementary Table S3.xlsx
- Supplementary Table S4.xlsx
- Supplementary Table S5.xlsx
- Supplementary Table S6.xlsx
- Supplementary Table S7.xlsx
- Supplementary Table S8.xlsx
- Supplementary Table S9.xlsx
