# Supplementary material for: Integration of Metabolomic and Transcriptomic Analyses Reveals the Molecular Mechanisms of Flower Color Formation in Prunus mume
Source: Plants (Basel). 2024 Apr 11;13(8):1077. doi: 10.3390/plants13081077 (PMC11054544; doi:10.3390/plants13081077)
Supplement: Supplementary file 1 [file plants-13-01077-s001.zip › Supplementary Table S1.xlsx]

## Sheet: Sheet1
Table S1: The content of metabolites.
Index	Formula	Compounds	Class I	Class II	CAS	Level	YD-1	YD-2	YD-3	WYY-1	WYY-2	WYY-3	VIP	P-value	Fold_Change	Log2FC	Type
pmb2987	C24H24O11	Acacetin-7-O-(6''-O-acetyl)glucoside	Flavonoids	Flavones	-	3	671065	723014	721160	530410	525739	557693	1.20896	0.0025999	0.76296	-0.390321	insig
Zmhp002409	C27H30O16	Isoluteolin-6,8-di-C-glucoside	Flavonoids	Flavones	-	3	376733	433081	425488	302394	354633	288183	1.07661	0.0233687	0.765164	-0.386158	insig
mws0044	C15H12O7	Taxifolin(Dihydroquercetin)	Flavonoids	Flavanonols	480-18-2	1	639399	703846	646544	1.66911e+06	1.81936e+06	1.70894e+06	1.23437	0.000340847	2.61204	1.38518	up
pmn001416	C24H20O9	Catechin-(7,8-bc)-4α-(3,4-dihydroxyphenyl)-dihydro-2-(3H)-one*	Flavonoids	Flavanols	-	1	2.76321e+06	3.15459e+06	3.15776e+06	3.24483e+06	4.13517e+06	3.40102e+06	0.865345	0.16266	1.18792	0.248435	insig
mws0061	C21H20O12	Quercetin-3-O-galactoside (Hyperin)	Flavonoids	Flavonols	482-36-0	1	6.54181e+08	6.63382e+08	666982235	7.40163e+08	7.24633e+08	7.32428e+08	1.22135	0.000314661	1.10717	0.146873	insig
mws0091	C21H20O12	Quercetin-3-O-glucoside (Isoquercitrin)	Flavonoids	Flavonols	482-35-9	1	6.63901e+08	6.76208e+08	6.75705e+08	7.49723e+08	7.70491e+08	7.79264e+08	1.21486	0.00295998	1.14072	0.189944	insig
Lmjp007790	C18H16O6	5-Hydroxy-3,7,4'-trimethoxyflavone	Flavonoids	Flavones	-	3	8266.85	7571.77	20627.7	9739.95	7618.4	7369.56	0.491375	0.45461	0.678103	-0.560424	insig
Ladp005389	C23H24O10	portulacanone D glucoside	Flavonoids	Other Flavonoids	-	3	521498	488432	576414	295718	189644	277335	1.15422	0.00330805	0.480789	-1.05652	down
Lmqn009304	C19H18O5	Eucalyptin (5-Hydroxy-7,4'-dimethoxy-6,8-dimethylflavone)	Flavonoids	Flavanones	3122-88-1	2	47450.4	51866.9	50113.3	54423	69281.6	87613.1	0.941604	0.162469	1.41415	0.499938	insig
MWSHY0102	C15H10O7	Morin	Flavonoids	Flavonols	480-16-0	3	1.22859e+06	1.24902e+06	1.01285e+06	2.30527e+06	3.71613e+06	2.80431e+06	1.17444	0.0459129	2.52852	1.33829	up
mws1094	C15H12O6	Aromadendrin (Dihydrokaempferol)	Flavonoids	Flavanonols	480-20-6	1	382664	364942	391419	985285	1.0305e+06	1.05131e+06	1.23653	0.000200543	2.69274	1.42907	up
Lssp210070	C21H22O10	Aromadendrin-3-O-galactoside(ISO2)	Flavonoids	Other Flavonoids	-	2	1.19643e+06	1.50792e+06	1.43715e+06	4.16007e+06	4.49805e+06	4.64342e+06	1.2274	0.000158532	3.21177	1.68337	up
Hmlp006326	C16H16O4	2',4'-dihydroxy-4-methoxydihydrochalcone	Flavonoids	Chalcones	-	3	156793	185535	169697	56394.6	34616.3	53713.3	1.20158	0.000414882	0.28265	-1.82291	down
Lamn006527	C15H12O6	Drimiopsin C	Flavonoids	Other Flavonoids	773850-90-1	3	1.71599e+06	1.9339e+06	1.87754e+06	2.93372e+06	3.17245e+06	3.02021e+06	1.22096	0.000237806	1.65111	0.723436	insig
Lmsp003252	C28H32O17	Isorhamnetin-3-O-sophoroside	Flavonoids	Flavonols	-	2	5.02887e+06	3.04393e+06	4.34344e+06	707706	986156	896719	1.20649	0.028155	0.208645	-2.26088	down
Lmnp002448	C28H32O17	5,7,3',4'-Tetrahydroxy-6-methoxyflavone-8-C-[glucosyl-(1-2)]-glucoside	Flavonoids	Flavones	-	2	9	9	9	5.96783e+06	2.42607e+06	4.64611e+06	1.23736	0.0521344	482964	18.8816	up
MWSHY0017	C15H12O5	Naringenin (5,7,4'-Trihydroxyflavanone)*	Flavonoids	Flavanones	480-41-1	1	3.51748e+06	3.69222e+06	3.69428e+06	3.02995e+06	2.82237e+06	2.94419e+06	1.20408	0.0011228	0.806725	-0.309851	insig
mws1397	C22H18O10	Epicatechin gallate*	Flavonoids	Flavanols	1257-08-5	3	42617.7	42585.1	27357.4	41067.4	34746.8	39695.8	0.172882	0.869716	1.02621	0.03732	insig
MWSHY0192	C16H12O4	Tectochrysin	Flavonoids	Flavones	520-28-5	3	206971	194627	188479	8905.42	9165.94	8816.64	1.23822	0.000834531	0.0455669	-4.45587	down
Wbtn005483	C16H14O8	1,3,6-trihydroxy-2,5,7-trimethoxyxanthen-9-one	Flavonoids	Other Flavonoids	-	1	199448	206673	196275	1.17447e+06	1.43852e+06	1.3534e+06	1.23595	0.00472828	6.58435	2.71904	up
pmb2991	C33H40O19	Apigenin-7-O-glucoside-4'-O-rutinoside	Flavonoids	Flavones	-	3	409363	71139.4	294589	11325.6	30517	132731	0.864976	0.171403	0.22523	-2.15053	insig
Lmsp002330	C33H40O20	Alcesefoliside	Flavonoids	Flavones	124151-38-8	2	33020.3	26119.7	23433.9	1.29629e+07	1.47027e+07	1.28264e+07	1.23789	0.00200403	490.372	8.93773	up
Lmhp002242	C33H41O20+	Cyanidin-3-O-(2''-O-glucosyl)rutinoside	Flavonoids	Anthocyanidins	-	3	33020.3	26119.7	23433.9	1.29629e+07	1.47027e+07	1.28264e+07	1.23789	0.00200403	490.372	8.93773	up
pmb0542	C24H23O14+	Cyanidin-3-O-(6''-O-malonyl)glucoside	Flavonoids	Anthocyanidins	171828-62-9	3	246544	214068	185700	2.34582e+06	2.63329e+06	2.64356e+06	1.23539	0.00131369	11.7941	3.55999	up
pme3475	C15H12O5	Butin; 7,3',4'-Trihydroxyflavanone*	Flavonoids	Flavanones	492-14-8	1	3.54496e+06	3.81453e+06	3.46102e+06	2.9174e+06	2.95607e+06	2.76529e+06	1.18006	0.00853594	0.79837	-0.32487	insig
Lmbn006032	C15H10O7	Hypolaetin	Flavonoids	Flavones	27696-41-9	2	177693	152162	192666	972503	736302	844681	1.22739	0.00848561	4.88686	2.28891	up
Jmyn006245	C17H16O6	(3R)-5,7-Dihydroxy-8-methyl-3-(2',4'-dihydroxybenzyl)-chroma-4-one	Flavonoids	Other Flavonoids	-	3	38608.4	39580.8	40321.3	41409.2	42013.8	43609.4	1.07255	0.029122	1.07191	0.100182	insig
Lmyn006227	C15H10O5	Galangin (3,5,7-Trihydroxyflavone)	Flavonoids	Flavones	548-83-4	3	39534.7	33078.6	38422.3	25426.1	22137.8	26245.5	1.16096	0.00987079	0.664736	-0.589147	insig
Zmgp003036	C15H12O5	3,5,7-Trihydroxyflavanone (Pinobanksin)	Flavonoids	Flavanonols	548-82-3	3	701751	884347	741405	803809	931880	796282	0.555243	0.39276	1.08785	0.121478	insig
MWSHY0149	C15H10O3	5-Hydroxyflavone	Flavonoids	Flavones	491-78-1	3	100308	99549.5	114723	108941	109095	87510.9	0.224799	0.748909	0.971285	-0.042034	insig
Hmln001682	C29H32O18	Quercetin-3-O-(6''-O-acetyl)glucosyl-(1→3)-Galactoside	Flavonoids	Flavonols	-	3	370508	414453	393823	179623	235969	205586	1.19725	0.00109684	0.526965	-0.924222	insig
HJN055	C21H24O10	Dihydrocharcone-4'-O-glucoside	Flavonoids	Chalcones	-	2	4.46028e+06	5.14684e+06	4.43356e+06	9.41431e+06	9.7815e+06	8.37859e+06	1.21486	0.0021554	1.96389	0.973717	insig
pmb3023	C21H22O11	Eriodictyol-8-C-glucoside	Flavonoids	Flavanones	1023271-51-3	3	1.18802e+06	1.16185e+06	1.1185e+06	1.42612e+06	1.44095e+06	1.56431e+06	1.19254	0.00838822	1.27766	0.353503	insig
mws1172	C22H22O10	Trifolirhizin (Maackiain-3-O-glucoside)	Flavonoids	Isoflavones	6807-83-6	3	103200	177043	170812	371435	377093	347974	1.15531	0.00608442	2.43096	1.28153	up
Lmsn006905	C31H32O13	Phloretin-4'-O-(6''-Feruloyl)glucoside	Flavonoids	Chalcones	-	3	33593.1	36053.4	34757.4	9648.91	12954.8	11164.1	1.22383	6.96815e-05	0.323435	-1.62845	down
Wbtp004753	C15H10O7	1,2,3,7,8-pentahydroxy-6-methylanthracene-9,10-dione	Flavonoids	Other Flavonoids	-	1	2.27594e+06	2.98317e+06	3.04047e+06	3.22011e+06	3.39926e+06	3.79868e+06	0.916723	0.0857185	1.25525	0.327974	insig
mws0919	C21H20O10	Kaempferol-3-O-rhamnoside (Afzelin)(Kaempferin)*	Flavonoids	Flavonols	482-39-3	3	140386	146642	124603	107791	120924	268734	0.214761	0.636025	1.20848	0.273199	insig
Lmxn007955	C18H16O8	Sudachitin	Flavonoids	Flavones	4281-28-1	3	16202.6	16349.7	15340.4	14034.5	14963.2	15809.9	0.80102	0.177034	0.935584	-0.0960607	insig
Zmhn003257	C16H12O6	5,7,2'-Trihydroxy-8-methoxyflavone*	Flavonoids	Flavones	-	3	156770	161205	139714	403362	453707	406040	1.23086	0.00123324	2.75975	1.46454	up
pmp001127	C16H12O6	Chrysoeriol; 5,7,4'-Trihydroxy-3'-Methoxyflavone*	Flavonoids	Flavones	491-71-4	3	925103	779739	862862	89896	392166	71964.1	1.06819	0.0132812	0.215767	-2.21245	down
Lmdp003994	C23H24O10	6,4'-Dimethoxyisoflavone-7-O-glucoside (Wistin)	Flavonoids	Isoflavones	19046-26-5	3	609728	522577	639785	198915	275847	223582	1.20307	0.00199962	0.394079	-1.34344	down
Lmhn000921	C20H18O14	3,4,5,3',4',5'-Hexahydroxydiphenoyl Acid-glucose	Tannins	Tannin	-	3	58169.9	52366.9	54576.4	65998.2	106841	92344.1	1.04384	0.105239	1.60607	0.683534	insig
pme2960	C15H12O5	Naringenin chalcone; 2',4,4',6'-Tetrahydroxychalcone	Flavonoids	Chalcones	73692-50-9	1	2.71677e+06	2.93768e+06	2.91108e+06	2.664e+06	3.98336e+06	3.04867e+06	0.516764	0.438422	1.13198	0.178851	insig
HJN005	C16H14O5	5,2'-Dihydroxy-7-methoxyflavanone	Flavonoids	Flavones	-	2	33461.1	34230.1	34845.7	26798.9	28483.1	29667.9	1.17442	0.00894303	0.828482	-0.271458	insig
Lssp210081	C30H26O12	Procyanidin B5	Tannins	Proanthocyanidins	12798-57-1	2	3.00397e+07	3.67163e+07	2.51696e+07	157283	462633	272723	1.22628	0.0119027	0.00971045	-6.68625	down
Cmxp005429	C15H12O6	Okanin	Flavonoids	Chalcones	484-76-4	3	3.23207e+06	3.44243e+06	3.25221e+06	4.02239e+06	3.96922e+06	3.88799e+06	1.2018	0.00270943	1.19673	0.259099	insig
Hmln003405	C20H16O12	Ellagic acid-4-O-rhamnoside	Tannins	Tannin	-	3	1.0827e+06	1.23097e+06	1.10676e+06	353462	376835	392762	1.23372	0.00226745	0.328339	-1.60674	down
mws0059	C27H30O16	Quercetin-3-O-rutinoside (Rutin)	Flavonoids	Flavonols	153-18-4	1	5.55543e+06	5.55776e+06	5.51372e+06	5.17512e+06	5.18952e+06	5.83185e+06	0.41418	0.57601	0.974113	-0.0378383	insig
Zmpp002571	C15H10O7	Robinetin	Flavonoids	Flavonols	490-31-3	3	2.45561e+07	2.25113e+07	2.45072e+07	1.35269e+07	14354500	8.99316e+06	1.13285	0.0111303	0.51519	-0.956823	insig
pmn001418	C24H20O9	Cinchonain Id	Flavonoids	Flavanols	85022-67-9	1	3.45313e+06	3.16813e+06	2.97388e+06	3.14305e+06	3.94418e+06	2.73149e+06	0.0759497	0.859661	1.0233	0.0332304	insig
Zmap009745	C18H16O7	Ayanin (3',5-Dihydroxy-3,4',7-Trimethoxyflavone)	Flavonoids	Flavones	572-32-7	3	198557	186905	182213	8800.92	4377.08	5571.91	1.22994	0.000322641	0.0330293	-4.92011	down
MWSHY0098	C15H14O7	Epigallocatechin	Flavonoids	Flavanols	970-74-1	3	461394	398437	411882	1.98773e+06	2.17236e+06	1.32276e+06	1.21029	0.031563	4.31139	2.10815	up
mws1329	C21H20O12	Quercetin-7-O-glucoside*	Flavonoids	Flavonols	491-50-9	1	1.52021e+07	1.41438e+07	1.37795e+07	1.50932e+07	1.65275e+07	1.50233e+07	0.839899	0.146779	1.08159	0.113153	insig
Zblp004976	C17H18O5	2,4'-Dihydroxy-4,6-dimethoxydihydrochalcone	Flavonoids	Chalcones	151752-07-7	3	940735	1.00049e+06	943792	2.27849e+06	2.85277e+06	2.23926e+06	1.221	0.0164018	2.55476	1.35319	up
MWSHY0202	C16H12O2	6-Methylflavone	Flavonoids	Flavones	29976-75-8	3	1.59718e+06	1.64017e+06	1.62274e+06	1.35695e+06	1.30844e+06	1.30719e+06	1.22615	0.000208897	0.817384	-0.290914	insig
Ybnn007052	C15H10O6	Norartocarpetin	Flavonoids	Flavones	520-30-9	1	2.88693e+06	2.88526e+06	2.71771e+06	1.4717e+06	2.09122e+06	1.56613e+06	1.13766	0.0213639	0.604136	-0.727055	insig
mws2118	C21H24O10	Phloretin-2'-O-glucoside (Phlorizin)	Flavonoids	Chalcones	60-81-1	1	3.63507e+06	3.5307e+06	3.62552e+06	7.00524e+06	7.84379e+06	6.08129e+06	1.20898	0.0215542	1.93956	0.955727	insig
mws1179	C21H22O10	Naringenin-7-O-glucoside (Prunin)*	Flavonoids	Flavanones	529-55-5	1	4.21019e+06	4.65396e+06	4.57584e+06	4.97353e+06	5.12457e+06	4.96924e+06	1.07714	0.0445643	1.12108	0.164893	insig
Wtmp009511	C19H16O5	7-hydroxy-12-methoxy-2,2-dimethyl-1,11-dioxatetracen-6-one	Flavonoids	Other Flavonoids	-	2	85126.3	89189.8	95882.5	296237	291399	312056	1.23551	9.16384e-05	3.32974	1.73541	up
Zmdp010109	C26H28O6	cannflavin A	Flavonoids	Other Flavonoids	-	3	27904.6	28588.3	28537.3	67037.9	70176.2	66317.1	1.23746	0.000630531	2.39364	1.2592	up
Lmfn004065	C20H18O11	Morin-3-O-arabinoside	Flavonoids	Flavonols	-	3	1.27259e+06	1.25601e+06	1.06942e+06	1.11583e+06	1.28671e+06	1.3028e+06	0.245114	0.706696	1.02983	0.0424012	insig
mws0355	C22H18O10	Catechin gallate*	Flavonoids	Flavanols	130405-40-2	3	40344.2	39636	35309.7	31121.8	31557.6	40958	0.617464	0.358834	0.898929	-0.153721	insig
HJN090	C21H22O10	Butin-7-O-glucoside*	Flavonoids	Flavanones	-	1	8.58309e+06	8.33752e+06	7.8343e+06	9.52064e+06	1.0556e+07	9.68377e+06	1.12913	0.0166454	1.2022	0.265681	insig
mws1175	C16H14O4	Pinostrobin	Flavonoids	Flavanones	480-37-5	3	538185	507726	491900	19324.6	17459.3	15829.6	1.23757	0.000708427	0.0342132	-4.8693	down
Hagn002504	C19H16O7	5,7,5'-Trimethoxy-3',4'-methylenedioxyflavonoid	Flavonoids	Flavones	-	3	1.17902e+06	1.188e+06	1.18048e+06	1.08074e+06	1.12821e+06	1.1224e+06	1.13495	0.0366192	0.93907	-0.0906958	insig
HJN046	C45H36O18	Aesculitannin A	Tannins	Tannin	-	3	1.94942e+06	2.2111e+06	1.9875e+06	1.187e+06	1.48331e+06	1.60768e+06	1.0924	0.0189033	0.695832	-0.523188	insig
Hmzp004605	C22H22O11	Ladanetin-6-O-β-D-glucosid	Flavonoids	Flavones	-	3	1.40603e+07	1.52869e+07	1.45603e+07	2.49311e+07	2.17613e+07	2.02944e+07	1.18279	0.0241884	1.52563	0.609409	insig
Lmsn004797	C21H24O11	3-Hydroxyphloretin-4'-O-glucoside	Flavonoids	Chalcones	-	3	2.39699e+06	2.67833e+06	2.59407e+06	1.12157e+06	1.45416e+06	1.35907e+06	1.20109	0.000747146	0.513054	-0.962819	insig
Lmsn007789	C30H30O11	Phloretin-4'-O-(6''-Cinnamoyl)glucoside	Flavonoids	Chalcones	-	3	4790.91	8949.05	9005.95	6339.03	7890.27	6567.42	0.152218	0.695544	0.914306	-0.129251	insig
pmn001417	C24H20O9	Cinchonain Ic	Flavonoids	Flavanols	85081-22-7	2	7.1444e+06	9.15209e+06	7.4455e+06	1.69353e+07	2.26661e+07	2.02444e+07	1.20231	0.0107019	2.52067	1.33381	up
MWSslk009	C13H8O2	Xanthone	Flavonoids	Other Flavonoids	90-47-1	3	84640	86145.5	79609.5	46173.6	46411.2	48947.4	1.23169	0.000716368	0.565236	-0.823076	insig
Lmqp007445	C19H18O9	5,7,4'-Trihydroxy-3,6,3',5'-Tetramethoxyflavone	Flavonoids	Flavones	-	3	194082	220874	202801	220730	216441	201398	0.418334	0.522289	1.03369	0.0478019	insig
Smlp002877	C21H21O10+	Peonidin-3-O-arabinoside	Flavonoids	Anthocyanidins	-	3	76162.7	106339	82759.3	5.45156e+06	5.8908e+06	5.63692e+06	1.23697	0.00049164	64.0097	6.00022	up
pmn001650	C60H50O24	Cinnamtannin B2	Tannins	Tannin	88038-12-4	3	266266	352771	293901	24586.7	122155	36314.1	1.09264	0.00410019	0.200513	-2.31823	down
HJN051	C28H32O16	Tamarixetin-3-O-rutinoside	Flavonoids	Flavonols	-	3	6.18282e+06	6.5862e+06	5.60571e+06	2.45146e+06	2.35674e+06	2.41608e+06	1.23195	0.00545441	0.393164	-1.3468	down
WaYn003347	C23H28O11	Glochiflavanoside A	Flavonoids	Flavanols	-	3	332604	369302	356520	8.36614e+06	1.00828e+07	7.96225e+06	1.23719	0.00585438	24.9532	4.64116	up
MWSHY0114	C16H12O5	Acacetin*	Flavonoids	Flavones	480-44-4	2	74569.3	62749.7	43931.9	35566.8	23928	28623.5	1.08771	0.0591199	0.486168	-1.04047	down
pme0088	C15H10O6	Luteolin (5,7,3',4'-Tetrahydroxyflavone)	Flavonoids	Flavones	491-70-3	1	132055	135835	125567	520955	565887	551034	1.23724	0.000607505	4.16279	2.05755	up
HJN086	C21H22O11	Eriodictyol-3'-O-glucoside	Flavonoids	Flavanones	-	1	765535	820363	756212	1.5737e+06	1.64622e+06	1.56243e+06	1.23424	2.82771e-05	2.0419	1.02991	up
Lmqp007185	C30H26O12	Kaempferol-3-O-(4''-O-p-Coumaroyl)rhamnoside	Flavonoids	Flavonols	-	3	95827.3	106913	83608.6	109302	93119.5	124068	0.628386	0.302394	1.14018	0.189263	insig
Lmqn004838	C15H8O8	3-O-Methylellagic acid	Tannins	Tannin	-	2	1.088e+06	1.15218e+06	1.22363e+06	2.36556e+06	3.13519e+06	2.66656e+06	1.21301	0.0174016	2.35789	1.2375	up
Hmgp002189	C22H22O11	Hispidulin-7-O-glucoside(Homoplantaginin)	Flavonoids	Flavones	17680-84-1	1	1.52002e+07	1.52806e+07	1.48903e+07	3.43788e+07	3.09048e+07	2.88738e+07	1.22652	0.00933145	2.07527	1.0533	up
mws0055	C20H20O7	Tangeretin (4',5,6,7,8-Pentamethoxyflavone)	Flavonoids	Flavones	481-53-8	3	773620	705456	764748	587103	534950	504178	1.17634	0.00327118	0.724759	-0.464428	insig
Hmln001836	C29H32O17	Kaempferol-3-O-(6''-Acetyl)glucosyl-(1→3)-Galactoside	Flavonoids	Flavonols	-	3	122544	128767	133574	65826.3	75154.9	69876.7	1.2244	0.000185266	0.547847	-0.868156	insig
mws1003	C16H12O8	Laricitrin	Flavonoids	Flavonols	53472-37-0	3	22392.3	24962.8	22558.5	119878	99603.2	113162	1.23397	0.00401226	4.75792	2.25033	up
mws0089	C21H20O11	Kaempferol-7-O-glucoside*	Flavonoids	Flavonols	16290-07-6	2	4.30737e+07	4.65247e+07	4.93704e+07	3.66772e+07	3.81981e+07	3.53625e+07	1.15271	0.0204954	0.793255	-0.334142	insig
pmp001204	C17H14O5	Apigenin-7,4'-dimethyl ether	Flavonoids	Flavones	5128-44-9	3	83695.4	66579.8	70332	91053.9	86203.2	91430	1.01112	0.0791419	1.21794	0.284447	insig
mws0066	C16H12O7	Isorhamnetin; 3'-Methoxy-3,4',5,7-Tetrahydroxyflavone	Flavonoids	Flavonols	480-19-3	3	122441	149583	130340	76755.3	95780.3	102242	1.0881	0.0187574	0.68291	-0.550233	insig
Zmgp004060	C22H22O11	paratensein-7-O-glucoside	Flavonoids	Isoflavones	-	3	1.75154e+07	1.74445e+07	1.61264e+07	34117970	2.20139e+07	2.14885e+07	0.980432	0.16375	1.5194	0.603499	insig
Wbtn004381	C15H12O8	1,3,6,8-tetrahydroxy-2,5-dimethoxyxanthen-9-one	Flavonoids	Other Flavonoids	-	1	382016	577315	415226	2.1941e+07	1.73868e+07	2.1227e+07	1.23467	0.00503553	44.0541	5.4612	up
Lajp003377	C30H26O12	Fisetinidol-(4α,6)-gallocatechin	Flavonoids	Flavanols	1262536-83-3	3	1.15348e+07	9.34634e+06	9.71488e+06	724878	3.5188e+06	1.23541e+06	1.11334	0.00193487	0.179078	-2.48134	down
Wbtn006715	C15H10O7	1,2,4,5,8-pentahydroxy-6-methylanthracene-9,10-dione	Flavonoids	Other Flavonoids	-	3	5.8211e+06	6.76898e+06	5.65009e+06	4.75079e+07	6.77758e+07	5.50219e+07	1.23192	0.0131161	9.33684	3.22293	up
Lmgp004731	C21H20O10	Genistein-7-O-galactoside	Flavonoids	Isoflavones	-	3	762907	871531	805219	549063	1.20937e+06	603228	0.230443	0.913986	0.96803	-0.0468771	insig
Cmyp002064	C22H22O11	Yuanhuanin	Flavonoids	Flavones	83133-14-6	3	1.51644e+07	1.47292e+07	1.50654e+07	2.5599e+07	2.23377e+07	2.67013e+07	1.20976	0.0163163	1.66013	0.731299	insig
mws1035	C33H40O19	Kaempferol-3-O-robinoside-7-O-rhamnoside (Robinin)	Flavonoids	Flavonols	301-19-9	2	3.92361e+06	1.59735e+06	561110	1.61182e+06	1.23827e+06	2.26863e+06	0.089644	0.782398	0.841609	-0.248779	insig
Lmsn006753	C30H30O12	Phloretin-4'-O-(6''-p-Coumaroyl)glucoside	Flavonoids	Chalcones	-	3	84852.6	85586.8	86717.4	35411.1	48655	52677.1	1.15929	0.0156648	0.53175	-0.91118	insig
mws1174	C17H14O6	3-O-Acetylpinobanksin	Flavonoids	Flavanonols	52117-69-8	3	2.05806e+07	1.9468e+07	1.90348e+07	215721	285382	209127	1.23704	0.000541792	0.0120208	-6.37832	down
Wbtn007603	C16H12O6	9,11-dimethoxy-2h-[1,3]dioxolo[4,5-b]xanthen-10-one	Flavonoids	Other Flavonoids	-	3	1.07678e+06	985402	1.12823e+06	77148.4	102357	83383.2	1.23489	0.00136398	0.0823996	-3.60122	down
Wbtn007469	C16H12O6	Protogenkwanone	Flavonoids	Other Flavonoids	-	3	1.07678e+06	985402	1.12823e+06	77148.4	102357	83383.2	1.23489	0.00136398	0.0823996	-3.60122	down
Yphn011804	C26H30O7	3'-O-Methyldiplacol	Flavonoids	Flavanonols	-	2	1.27935e+06	898444	1.27135e+06	835461	1.14563e+06	1.19631e+06	0.299413	0.620391	0.921212	-0.118396	insig
Lmpn006208	C22H22O11	8-Methoxykaempferol-7-O-rhamnoside	Flavonoids	Flavonols	-	3	168629	200241	199877	46490.8	48606.5	32148.3	1.2166	0.0012323	0.22373	-2.16017	down
mws1034	C16H14O5	Isosakuranetin (5,7-Dihydroxy-4'-methoxyflavanone)	Flavonoids	Flavanones	480-43-3	3	204219	214252	124898	206371	221246	249580	0.694235	0.252439	1.24629	0.317645	insig
Zmjp010694	C19H18O7	5-Hydroxy-3,7,3',4'-tetramethoxyflavone (Retusin)*	Flavonoids	Flavones	1245-15-4	3	7928.02	6989.83	5709.5	9888.93	8623.65	12078.5	1.01627	0.0602137	1.48304	0.568553	insig
Wbtn006411	C13H8O6	Urolithin D	Flavonoids	Other Flavonoids	131086-98-1	3	353185	310481	304622	2.52761e+06	3.37254e+06	2.50697e+06	1.2328	0.0127772	8.68246	3.1181	up
Lmtp003079	C28H33O15+	Peonidin-3-O-rutinoside	Flavonoids	Anthocyanidins	-	1	2.05569e+07	2.03497e+07	1.97422e+07	2.23765e+08	2.25405e+08	2.2357e+08	1.2385	3.06618e-07	11.0924	3.4715	up
Lacp006164	C17H16O5	Erythbidin D	Flavonoids	Other Flavonoids	-	3	326171	253377	289311	677087	711741	714249	1.22169	0.000315303	2.42051	1.27531	up
pmn001648	C45H36O18	Cinnamtannin D1	Tannins	Tannin	97233-06-2	3	2.31393e+06	1.91472e+06	2.41552e+06	1.038e+06	1.27873e+06	1.46548e+06	1.13664	0.0092681	0.569253	-0.812857	insig
Lmgp004217	C28H32O15	Diosmetin-8-C-(2''-O-rhamnosyl)glucoside	Flavonoids	Flavones	98891-92-0	3	1.1337e+06	1.36724e+06	1.1909e+06	247916	335889	532665	1.16275	0.00163422	0.302416	-1.7254	down
mws0920	C15H10O7	Tricetin (5,7,3',4',5'-Pentahydroxyflavone)	Flavonoids	Flavones	520-31-0	2	429408	151338	145023	1.42171e+06	254997	376862	0.71595	0.354477	2.82951	1.50055	insig
Hmlp003068	C27H30O17	Meratin	Flavonoids	Flavones	27215-04-9	1	2.46155e+06	2.88455e+06	3.26177e+06	1.12323e+06	1.48657e+06	1.02304e+06	1.17938	0.00655758	0.422037	-1.24456	down
Zjhp090605	C17H16O5	(3R)-5,7-dihydroxy-8-methyl-3-(4'-hydroxybenzyl)-chroman-4-one	Flavonoids	Other Flavonoids	-	3	65742.3	71724.4	56031.4	11315.8	11660	17902.6	1.21265	0.00263551	0.21126	-2.24291	down
pmn001716	C21H20O11	Carthamone	Flavonoids	Chalcones	86579-00-2	1	4.37987e+07	4.5022e+07	4.70985e+07	3.22277e+07	3.17353e+07	3.25049e+07	1.2286	0.00370085	0.709745	-0.494628	insig
pme1201	C15H14O5	Phloretin	Flavonoids	Chalcones	60-82-2	1	1.47323e+06	1.42602e+06	1.42416e+06	1.03343e+06	1.21396e+06	1.08907e+06	1.15934	0.0184324	0.77172	-0.37385	insig
pmp000379	C25H26O5	6,8-Diprenylgenistein; 5,7,4'-Trihydroxy-6,8-Diprenylisoflavone	Flavonoids	Isoflavones	51225-28-6	3	82938.2	82473.2	89715.8	75259.5	79657.3	75825.6	1.0383	0.0526406	0.904421	-0.144934	insig
Xmsn002700	C21H22O12	Taxifolin-3'-O-glucoside	Flavonoids	Flavanonols	31106-05-5	2	4.94154e+07	5.03912e+07	5.6156e+07	5.54749e+07	6.0007e+07	5.76609e+07	0.935461	0.0947423	1.11016	0.150762	insig
MWSHY0118	C19H18O6	5,6,7,4'-Tetramethoxyflavone	Flavonoids	Flavones	1168-42-9	3	23724.7	19930.6	39706.5	15996.2	29153.1	24891.5	0.34743	0.575912	0.840203	-0.251191	insig
Wagp009079	C21H22O8	3,5,6,7,8,4'-Hexamethoxyflavone	Flavonoids	Flavones	34170-18-8	3	343353	303193	394198	340737	264982	295136	0.700943	0.24795	0.865588	-0.208247	insig
Hmhp005160	C17H14O7	Rehderianin I	Flavonoids	Flavonols	90965-30-3	3	559333	502237	436991	34506.4	18611.6	48368	1.21296	0.0038894	0.0677224	-3.88422	down
pmn001551	C21H22O9	Natsudaidain (3-Hydroxy-3',4',5,6,7,8-hexamethoxyflavone)	Flavonoids	Flavonols	35154-55-3	3	18332.2	16989.8	16601.6	5616.58	5418.62	4669.97	1.23115	0.000212311	0.302467	-1.72515	down
Jmgn004021	C21H22O11	6-C-Glucosyl-2-Hydroxynaringenin	Flavonoids	Flavanones	-	2	321857	303617	344106	719298	728553	614716	1.22064	0.00577665	2.12728	1.08901	up
mws4183	C20H18O11	Quercetin-3-O-arabinoside	Flavonoids	Flavonols	22255-13-6	1	1.14804e+06	1.12083e+06	1.07306e+06	1.2131e+06	923668	1.25358e+06	0.0326164	0.892121	1.01449	0.0207487	insig
pmn001640	C20H18O12	Myricetin-3-O-arabinoside	Flavonoids	Flavonols	132679-85-7	3	73585.7	75340.2	93395.8	103216	112218	111719	1.0947	0.0304514	1.35008	0.43304	insig
pmp001106	C27H30O15	Vitexin-2''-O-glucoside	Flavonoids	Flavones	61360-94-9	3	906781	672744	855441	432589	439344	378020	1.18144	0.0242514	0.513335	-0.962027	insig
pmb2999	C22H22O11	Chrysoeriol-5-O-glucoside	Flavonoids	Flavones	-	3	2.72493e+07	2.54177e+07	2.6908e+07	3.3442e+07	1.99068e+07	3.23458e+07	0.171473	0.685692	1.0769	0.106888	insig
Hmcn001884	C21H20O12	6-Hydroxyluteolin 5-glucoside	Flavonoids	Flavones	-	1	1.37383e+07	1.45991e+07	1.43601e+07	1.45487e+07	1.66829e+07	1.63917e+07	0.935827	0.119938	1.11536	0.157513	insig
Lacn005875	C20H20O6	Phellodensin D	Flavonoids	Flavanones	-	2	415827	368786	306311	556578	627127	570454	1.15158	0.00657355	1.60796	0.68523	insig
Lmtn002997	C22H22O13	Mearnsetin-3-O-glucoside	Flavonoids	Flavones	-	3	359806	365636	358725	407478	89117.6	528047	0.326992	0.893458	0.945097	-0.0814658	insig
HJN104	C21H22O13	Dihydromyricetin-3-O-glucoside	Flavonoids	Flavanonols	-	3	8.48205e+06	8.04232e+06	8.10906e+06	947855	1.01738e+06	938078	1.2379	0.000238185	0.117861	-3.08484	down
Lmsn002815	C27H30O15	Kaempferol-3-O-rutinoside(Nicotiflorin)*	Flavonoids	Flavonols	17650-84-9	1	1.77052e+06	1.82333e+06	1.68201e+06	599537	781225	641854	1.22015	0.000153664	0.383372	-1.38318	down
Hmgn002254	C17H14O8	5,7,3'-Trihydroxy-4,6,5'-trimethoxyxanthone	Flavonoids	Other Flavonoids	-	3	70402.9	71191.4	50666.4	96909	86630.9	78361.3	0.967164	0.0568558	1.36222	0.445959	insig
Wbtn006810	C15H12O6	6,7-dihydroxy-1,3-dimethoxyxanthen-9-one	Flavonoids	Other Flavonoids	-	1	8.35096e+06	8.401e+06	8.28849e+06	1.07926e+07	1.10203e+07	1.01923e+07	1.21669	0.0101378	1.27814	0.354042	insig
zjgp122057	C15H12O7	7,8,3',4'-tetrahydroxyflavanonol	Flavonoids	Flavonols	-	1	111521	156826	95292.7	2.8255e+06	4.61425e+06	2.33847e+06	1.22472	0.0452353	26.8899	4.74899	up
Zmcn003256	C42H46O23	kaempferol-3-p-coumaroyldiglucoside-7-glucoside	Flavonoids	Flavonols	-	3	22252.4	21379.6	21834.8	19787.9	20755	22820.4	0.455789	0.519734	0.967869	-0.047116	insig
Hmhp002834	C20H19O10+	Cyanidin 3-xyloside	Flavonoids	Anthocyanidins	29761-24-8	3	688382	583238	592913	1.66007e+07	1.79662e+07	1.69725e+07	1.23792	0.000561202	27.642	4.78879	up
HJN043	C45H36O18	Cinnamtannin B1	Tannins	Tannin	88082-60-4	3	927960	915529	917406	605269	875093	798723	0.836486	0.183219	0.825487	-0.276682	insig
pmb0665	C27H30O16	Orientin-7-O-glucoside	Flavonoids	Flavones	-	3	1.39225e+07	8.99376e+06	1.54873e+07	7.70264e+06	1.20516e+07	1.24713e+07	0.437164	0.455669	0.839129	-0.253035	insig
HJN087	C21H22O10	Naringenin-4'-O-glucoside*	Flavonoids	Flavanones	-	1	9.39801e+06	8.38187e+06	8.66558e+06	9.91996e+06	1.02403e+07	1.01701e+07	1.10401	0.0400775	1.1469	0.19774	insig
Smbn003459	C15H12O6	Carthamidin	Flavonoids	Flavanones	479-54-9	3	41967.1	41488.8	45918.3	120063	127607	116474	1.23463	0.000395877	2.81466	1.49296	up
mws1045	C27H30O17	Myricetin-3-O-rutinoside	Flavonoids	Flavonols	-	3	647069	479214	501732	428375	536688	195036	0.668925	0.263333	0.712585	-0.488866	insig
Lmmn003398	C23H22O12	Kaempferol-3-O-(6''-O-acetyl)glucoside	Flavonoids	Flavonols	-	1	3.79847e+07	3.70261e+07	3.97087e+07	1.18028e+07	1.08087e+07	1.14126e+07	1.23687	0.000223972	0.296585	-1.75348	down
mws0064	C15H12O6	Eriodictyol (5,7,3',4'-Tetrahydroxyflavanone)	Flavonoids	Flavanones	552-58-9	1	7.8272e+06	7.7365e+06	7.58625e+06	1.00314e+07	9.79974e+06	9.98624e+06	1.23335	2.4112e-05	1.28801	0.365146	insig
Lcsn003955	C15H12O6	Maesopsin	Flavonoids	Other Flavonoids	5989-16-2	3	1.77294e+06	2.14208e+06	2.22134e+06	4.06646e+06	3.89782e+06	4.1502e+06	1.21103	0.000944555	1.97421	0.981277	insig
Lmhp002832	C26H28O13	Chrysin-6-C-arabinoside-8-C-glucoside	Flavonoids	Flavones	185145-33-9	3	98792.3	109627	112829	69895	78080.1	67152.7	1.18554	0.00340096	0.669662	-0.578496	insig
Hmlp005624	C16H12O5	3',7-dihydroxy-4'-methoxyflavone	Flavonoids	Flavones	-	3	375973	396197	363194	536218	665353	493258	1.12183	0.0645132	1.49276	0.577984	insig
Hmsp006409	C16H12O10S	Persicarin (Isohamnetin-3-O-sulfate)	Flavonoids	Flavones	549-31-5	3	405270	727208	706647	1.38505e+06	1500534	1.42232e+06	1.1353	0.00981688	2.34237	1.22797	up
pmp000129	C33H40O18	Natsudaidain-3-O-(3-hydroxy-3-methylglutarate)glucoside	Flavonoids	Flavonols	-	3	220350	39688.8	126397	134149	142859	150151	0.374143	0.819389	1.10538	0.144545	insig
pme0001	C28H34O15	Hesperetin-7-O-neohesperidoside(Neohesperidin)*	Flavonoids	Flavanones	13241-33-3	3	4.64685e+07	4.457e+07	4.77241e+07	4.7356e+07	4.79983e+07	4.3436e+07	0.00334439	0.995977	1.0002	0.000286564	insig
pme0432	C30H24O12	Procyanidin A2*	Tannins	Proanthocyanidins	41743-41-3	3	2.43581e+06	2.28732e+06	2.58606e+06	4.18388e+06	7.11199e+06	5.09409e+06	1.14897	0.0714837	2.24238	1.16503	up
Lmsn003588	C17H14O5	Pterocarpine	Flavonoids	Isoflavones	524-97-0	3	40640.6	40270.8	43162.1	19988.7	19151.1	8869.14	1.09588	0.0147975	0.386939	-1.36982	down
pme0436	C30H26O12	Procyanidin B3*	Tannins	Proanthocyanidins	23567-23-9	1	1.76066e+07	1.48567e+07	1.39037e+07	1.18196e+06	3.1989e+06	1.9056e+06	1.19018	0.00166312	0.135581	-2.88278	down
mws0836	C30H26O12	Procyanidin B1	Tannins	Proanthocyanidins	20315-25-7	1	9.81589e+06	9.06801e+06	1.01115e+07	669708	1.77711e+06	1.11184e+06	1.19781	4.60223e-05	0.122732	-3.02642	down
Lmbn005167	C16H14O6	Ferreirin	Flavonoids	Isoflavones	32898-79-6	3	95976.5	145621	66321.4	145532	145013	161741	0.850209	0.16724	1.46885	0.554688	insig
Zmhp004065	C18H16O7	7,8-Dihydroxy-5,6,4'-trimethoxyflavone*	Flavonoids	Flavones	-	3	23529.9	22708.8	11406	5173.41	11481.2	14405.2	0.795693	0.145097	0.538815	-0.892137	insig
Wbtn009050	C15H12O4	1,8-dihydroxy-2,6-dimethylxanthen-9-one	Flavonoids	Other Flavonoids	-	1	9.66051e+06	9.58459e+06	9.74464e+06	3.96471e+06	4.15294e+06	4.086e+06	1.23779	2.40036e-07	0.420964	-1.24823	down
Lmmp002529	C33H40O21	Gossypetin-3-O-rutinoside-8-O-rhamnoside	Flavonoids	Flavonols	-	2	492802	409550	794313	6.93633e+06	5.05911e+06	6.28484e+06	1.21833	0.00761701	10.7742	3.42951	up
pmb0725	C33H32O15	Tricin-7-O-(2''-feruloyl)glucoside	Flavonoids	Flavones	-	3	157896	169653	144549	149451	182053	276045	0.628794	0.355975	1.28691	0.363915	insig
pmn001415	C24H20O9	Catechin-(7,8-bc)-4β-(3,4-dihydroxyphenyl)-dihydro-2-(3H)-one*	Flavonoids	Flavanols	-	1	3.04948e+06	3.16143e+06	2.97929e+06	3.02851e+06	4.00485e+06	3.19013e+06	0.613955	0.372386	1.11243	0.15372	insig
MW0132741	C15H10O4	3,5-Dihydroxyflavone	Flavonoids	Flavones	6665-69-6	3	2.4134e+07	2.25006e+07	2.14148e+07	252388	311858	231736	1.23722	0.00122917	0.0116971	-6.4177	down
HJN069	C30H24O12	Tetrahydroxyflavan-(4α-8-epicatechin)	Flavonoids	Flavanols	-	2	3.50799e+06	3.73056e+06	3.69179e+06	5.31202e+06	1.44492e+07	7.96719e+06	1.02159	0.175068	2.53683	1.34302	up
mws0917	C17H14O7	3,7-Di-O-methylquercetin	Flavonoids	Flavonols	2068-02-2	2	859684	779059	736718	8405.57	8170.09	9810.93	1.23792	0.00211108	0.011108	-6.49226	down
mws0789	C15H12O4	Pinocembrin (Dihydrochrysin)	Flavonoids	Flavanones	480-39-7	1	4.39424e+06	4.25964e+06	4.2094e+06	1.64647e+06	1.65308e+06	1.61454e+06	1.23783	0.000251949	0.382025	-1.38826	down
Hmmp004965	C22H22O11	Diosmetin-7-O-glucoside*	Flavonoids	Flavones	20126-59-4	1	1.66969e+07	1.42163e+07	1.68474e+07	3.385e+07	2.8883e+07	2.88692e+07	1.20585	0.0043795	1.91795	0.939563	insig
pmp000579	C22H22O11	Diosmetin-7-O-galactoside*	Flavonoids	Flavones	-	1	1.66969e+07	1.42163e+07	1.68474e+07	3.385e+07	2.8883e+07	2.88692e+07	1.20585	0.0043795	1.91795	0.939563	insig
pmb3053	C27H24O11	Tricin-4'-O-eudesmic acid	Flavonoids	Flavones	-	3	23289.4	24994.2	22995.5	13594.2	14037.8	12908.4	1.22854	0.000665052	0.568754	-0.814123	insig
Li512111	C24H24O13	Isorhamnetin-3-O-(6''-acetylglucoside)	Flavonoids	Flavonols	-	2	1.12158e+07	1.13516e+07	1.05488e+07	1.8187e+06	1.98635e+06	1.65305e+06	1.23576	0.000159472	0.164816	-2.60107	down
pmb2586	C30H26O13	Gallocatechin-(4α→8)-catechin	Flavonoids	Flavanols	-	3	737027	715857	716158	406448	417348	440363	1.23315	3.92089e-05	0.582819	-0.778881	insig
Hagn002801	C20H18O8	5,6,7,5'-tetramethoxy-3',4'-methylenedioxyflavonoid	Flavonoids	Flavones	-	3	365847	386362	386672	375950	430077	471752	0.779389	0.232981	1.12196	0.166021	insig
Lmmn004625	C21H22O11	Dihydrokaempferol-7-O-glucoside	Flavonoids	Flavanonols	-	3	786417	841462	785445	1.59785e+06	1.75263e+06	1.59041e+06	1.2315	0.00167681	2.04734	1.03375	up
Wbtp004863	C20H20O11	4-(beta-D-Glucopyranosyl)-7-methoxy-1,3,6-trihydroxy-9H-xanthene-9-one	Flavonoids	Other Flavonoids	-	3	255235	296980	330390	9	9	9	1.23844	0.00541637	3.05913e-05	-14.9965	down
Wbtp005759	C15H10O7	1,2,5,7,8-pentahydroxy-3-methylanthracene-9,10-dione	Flavonoids	Other Flavonoids	-	2	1.71848e+07	2.46616e+07	1.95321e+07	5.2287e+07	7.58827e+07	6.02856e+07	1.19577	0.0181425	3.07038	1.61842	up
mws0040	C15H10O4	Chrysin	Flavonoids	Flavones	480-40-0	1	3.89717e+06	3.69376e+06	3.4627e+06	52581	67073.6	48953	1.23688	0.00117169	0.0152536	-6.03471	down
pma6558	C17H14O6	Velutin (5,4'-dihydroxy-7,3'-dimethoxyflavone)	Flavonoids	Flavones	25739-41-7	3	174696	156360	163771	6290.23	5952.53	6707.12	1.23805	0.00110655	0.0382959	-4.70667	down
pmb0587	C28H30O17	Chrysoeriol-7-O-(2''-O-glucuronyl)glucoside	Flavonoids	Flavones	-	3	50955.4	66622.9	80979.4	922408	795935	899025	1.23081	0.00152919	13.1819	3.72049	up
Laxp009625	C17H14O6	(Z)-4,6-Dihydroxy-2-(4-Hydroxy-3-Methoxybenzylidene)-7-Methylbenzofuran-3(2h)-One	Flavonoids	Other Flavonoids	-	3	228084	245907	218734	168816	179646	171989	1.19455	0.0101568	0.751309	-0.412522	insig
Lmfp002421	C33H40O21	Quercetin-3-O-[rhamnosyl(1→2)glucosyl]-5-O-glucoside*	Flavonoids	Flavonols	-	1	100420	94365	73727.9	124505	99931.5	180255	0.869868	0.188196	1.50716	0.59183	insig
MWSHY0065	C15H14O6	Catechin*	Flavonoids	Flavanols	154-23-4	1	1.0266e+07	1.05843e+07	1.08428e+07	4.15381e+06	4.71402e+06	4.81887e+06	1.23035	3.20493e-05	0.431852	-1.21139	down
pme1662	C16H14O5	5,4'-Dihydroxy-7-methoxyflavanone (Sakuranetin)	Flavonoids	Flavanones	2957-21-3	3	298203	301139	290072	302182	350728	366654	0.923565	0.151162	1.14633	0.197026	insig
mws0129	C16H12O5	Genkwanin (Apigenin 7-methyl ether)*	Flavonoids	Flavones	437-64-9	2	338307	325555	305377	134312	125212	127306	1.23452	0.0012505	0.399106	-1.32515	down
Hmgp001996	C15H10O8	Quercetagetin; 3,3',4',5,6,7-Hexahydroxyflavone	Flavonoids	Flavonols	90-18-6	3	652663	494534	681435	3193760	1.45545e+06	1.59794e+06	1.12673	0.116737	3.4163	1.77243	up
pmb2947	C45H38O18	Catechin-catechin-catechin	Flavonoids	Flavanols	-	3	2.34772e+06	2.69594e+06	2.4845e+06	151106	990099	360426	1.07217	0.00790842	0.199468	-2.32577	down
pmp000530	C26H30O11	Phellodendroside	Flavonoids	Flavanonols	40451-69-2	3	378268	120292	280559	423956	204840	505575	0.523422	0.370798	1.45597	0.541976	insig
Lmpp005784	C21H20O12	6-Methoxyquercetin-3-O-Xyloside	Flavonoids	Flavonols	-	3	93370	46319	58350	148415	61007.7	106710	0.692541	0.262922	1.59632	0.674745	insig
HJAP155	C21H20O12	Laricitrin-3-O-xyloside	Flavonoids	Flavonols	-	3	93370	46319	58350	148415	61007.7	106710	0.692541	0.262922	1.59632	0.674745	insig
Lmjn007168	C17H14O7	Quercetin-3,3'-dimethyl ether	Flavonoids	Flavonols	4382-17-6	1	105308	91535.9	91567.9	1687.31	6593.88	4150.98	1.2024	0.00115846	0.0431056	-4.53598	down
Lmzn001894	C21H18O12	Kaempferol-3-O-glucuronide	Flavonoids	Flavonols	22688-78-4	2	590246	518773	561830	687913	669965	649724	1.13281	0.0169073	1.20154	0.264891	insig
mws0049	C15H14O7	Gallocatechin	Flavonoids	Flavanols	970-73-0	3	245274	244827	249859	1.40942e+06	1.57388e+06	1.48277e+06	1.2378	0.00144774	6.03554	2.59348	up
mws0913	C21H20O11	Kaempferol-3-O-galactoside (Trifolin)*	Flavonoids	Flavonols	23627-87-4	2	2.80816e+07	4.72223e+07	2.81081e+07	3.46029e+07	1.6493e+07	3.84403e+07	0.335619	0.645057	0.86582	-0.207862	insig
Cmsp004086	C16H14O6	Dihydrokaempferide	Flavonoids	Flavanonols	137225-59-3	2	3.77641e+06	3.46658e+06	3.5059e+06	4.83643e+06	4.61901e+06	4.93364e+06	1.20772	0.000848355	1.33866	0.420788	insig
Zajn002491	C21H24O11	catechin-4-β-D-galactopyranoside*	Flavonoids	Flavanols	-	3	338180	310452	346079	332813	368247	381432	0.773284	0.186995	1.08825	0.122007	insig
Hmln002199	C23H22O13	Quercetin-3-O-(6''-O-acetyl)galactoside	Flavonoids	Flavonols	-	1	1.72754e+06	1.61552e+06	1.7664e+06	2.746e+06	2.40108e+06	2.75177e+06	1.20324	0.00803269	1.54593	0.628473	insig
Wbtn007675	C15H10O6	Calyxanthone	Flavonoids	Other Flavonoids	98973-45-6	1	3.04069e+06	2.97113e+06	2.89774e+06	1.59078e+06	1.94903e+06	1.83571e+06	1.20297	0.00349355	0.603344	-0.728948	insig
mws4067	C16H14O4	Isomedicarpin	Flavonoids	Isoflavones	74560-05-7	3	374678	380700	380301	11326.7	11770.7	5456.12	1.22718	2.0936e-08	0.0251423	-5.31374	down
mws0918	C16H12O5	Prunetin (5,4'-Dihydroxy-7-methoxyisoflavone)	Flavonoids	Isoflavones	552-59-0	3	168784	105621	85702.1	23567.7	16197.9	17142.9	1.19962	0.0551299	0.158033	-2.66171	down
Lcyp000677	C22H22O10	Prunetin-4'-O-glucoside(Prunitrin)	Flavonoids	Isoflavones	154-36-9	3	177889	174985	222231	510577	474702	387982	1.19918	0.00938611	2.38784	1.25571	up
Zjhp090625	C22H22O10	(E)-7-O-β-D-glucopyranoside-5-hydroxy-3-(4'-hydroxybenzylidene)-chroman-4-one	Flavonoids	Other Flavonoids	-	3	177889	174985	222231	510577	474702	387982	1.19918	0.00938611	2.38784	1.25571	up
pmf0371	C16H12O7	Pedalitin	Flavonoids	Flavones	22384-63-0	3	1.00594e+06	1.39092e+06	1.41142e+06	2.6221e+06	2.65987e+06	3.26246e+06	1.17773	0.00523075	2.24365	1.16585	up
Lmmp005125	C16H14O4	Pinostrobin Chalcone	Flavonoids	Chalcones	18956-15-5	3	433205	373702	343467	7585.03	20615.3	12344.2	1.21984	0.00436304	0.0352446	-4.82646	down
pme2246	C14H6O8	Ellagic acid	Tannins	Tannin	476-66-4	3	120931	123344	129237	199729	204727	209820	1.23242	3.72737e-05	1.64459	0.717732	insig
MWSHC20110	C16H12O6	8-Methoxyapigenin	Flavonoids	Flavones	57096-02-3	3	278807	288600	261470	608781	608797	574372	1.23372	5.344e-05	2.1619	1.1123	up
Hajp007218	C16H12O6	5,7,3',5'-tetrahydroxy-6-methylfavanone	Flavonoids	Flavones	-	3	278807	288600	261470	608781	608797	574372	1.23372	5.344e-05	2.1619	1.1123	up
pmn001702	C21H18O12	Tetahydroxyflavone-7-O-glucuronide	Flavonoids	Flavones	-	3	588159	599825	549068	708023	679376	676469	1.16827	0.00635797	1.18814	0.248709	insig
Labn004865	C21H22O10	Hydroxy isoliquiritigenin glucoside	Flavonoids	Chalcones	-	3	6.39787e+06	4.93898e+06	5.1093e+06	1.21741e+07	1.29187e+07	8.52826e+06	1.13803	0.0403684	2.04431	1.03162	up
Lmyp005841	C21H20O9	Chrysin-7-O-glucoside*	Flavonoids	Flavones	31025-53-3	3	1.05876e+06	988886	993271	259129	208539	278012	1.22912	1.63134e-05	0.245215	-2.02788	down
Lmhn004030	C15H14O6	5,7,3',4',5'-Pentahydroxyflavan (Tricetiflavan)	Flavonoids	Flavanols	-	3	1.00664e+07	1.02343e+07	1.02964e+07	9.95284e+06	1.03061e+07	1.0199e+07	0.227955	0.732435	0.995452	-0.00657674	insig
Lcyp000689	C27H31O16+	Cyanidin-3-O-gentiobioside	Flavonoids	Anthocyanidins	47845-44-3	3	235603	140009	164693	5.06488e+07	6.007e+07	5.51308e+07	1.23677	0.00242676	306.955	8.26189	up
Cmxp004977	C15H12O6	Isookanin	Flavonoids	Flavanones	-	3	265883	272703	304089	651587	604018	606226	1.22932	0.00010301	2.20943	1.14367	up
Zmbp003860	C23H23O11+	Pelargonidin-3-O-(6''-O-acetyl)glucoside	Flavonoids	Anthocyanidins	-	3	488416	534904	431346	3.2403e+07	3.4237e+07	3.02577e+07	1.23788	0.00129528	66.6117	6.0577	up
mws0043	C21H22O8	Nobiletin (5,6,7,8,3',4'-Hexamethoxyflavone)	Flavonoids	Flavones	478-01-3	3	609919	539410	669660	518750	421212	406567	1.0381	0.0380467	0.740263	-0.433891	insig
Lmsp004749	C29H34O17	Syringetin-3-O-rutinoside	Flavonoids	Flavonols	53430-50-5	3	9	9	9	498447	149111	345921	1.23541	0.081938	36795.5	15.1672	up
mws0036	C28H34O15	Hesperetin-7-O-rutinoside (Hesperidin)*	Flavonoids	Flavanones	520-26-3	3	8.3617e+06	7.61615e+06	8.54406e+06	8.74995e+06	8.57642e+06	8.68513e+06	0.797593	0.219657	1.06075	0.085078	insig
Lmmp003903	C23H22O12	Kaempferol-3-O-(2''-O-acetyl)glucoside	Flavonoids	Flavonols	-	1	6919180	3.70785e+06	6.9727e+06	5.60518e+06	7.21248e+06	1.10202e+07	0.578652	0.350907	1.35445	0.437705	insig
Lmln001951	C26H28O16	Quercetin-3-O-(6''-O-arabinosyl)glucoside	Flavonoids	Flavonols	-	3	534719	534922	600941	588420	636350	570755	0.72303	0.231685	1.07479	0.104054	insig
Lmdp003808	C16H12O7	Azaleatin (5-O-Methylquercetin)	Flavonoids	Flavonols	529-51-1	1	880288	881868	885122	79823.6	45452.3	48336.2	1.22842	0.000141997	0.0655814	-3.93057	down
pmb0618	C28H34O16	Hesperetin-8-C-glucoside-3'-O-glucoside	Flavonoids	Flavonols	-	3	2.29175e+06	2.29319e+06	1.5958e+06	686601	634447	694492	1.20843	0.0262031	0.3261	-1.61661	down
Zmxp005470	C26H26O15	Tricin-7-O-(6''-O-malonyl)glucoside	Flavonoids	Flavones	-	3	61953.3	29551.2	31728.8	35416.8	39496.4	43202.2	0.0360837	0.886817	0.95847	-0.0611954	insig
Lmmn004912	C16H12O7	3-O-Methylquercetin	Flavonoids	Flavonols	1486-70-0	3	71538.7	84399.9	68241.1	23204.8	23381.1	24840.4	1.23002	0.00867304	0.318612	-1.65013	down
HJN053	C30H24O12	2α,3α-Epoxy-5,7,3',4'-tetrahydroxyflavan-(4β-8-epicatechin)*	Tannins	Proanthocyanidins	-	1	3.3009e+06	3.45614e+06	3.42875e+06	4.7923e+06	13229868	7.08369e+06	1.00293	0.187001	2.46479	1.30147	up
mws1068	C15H10O6	Kaempferol (3,5,7,4'-Tetrahydroxyflavone)	Flavonoids	Flavonols	520-18-3	3	147408	134890	134468	68788.1	99778.5	74806.3	1.13882	0.0141329	0.583956	-0.776068	insig
pme3392	C21H21O10+	Pelargonidin-3-O-glucoside	Flavonoids	Anthocyanidins	47684-27-5	3	8.0643e+06	8.80436e+06	9.25123e+06	102971507	1.05407e+08	9.91927e+07	1.23772	0.000238848	11.7754	3.5577	up
pmp000233	C22H22O11	Swertiajaponin	Flavonoids	Flavones	6980-25-2	3	129306	137216	163344	161157	143752	161871	0.581659	0.371862	1.08587	0.118851	insig
Smgp105565	C24H20O9	Cinchonain Ib*	Flavonoids	Flavanols	85081-24-9	2	211227	302139	183524	758728	808235	793063	1.20402	0.00138507	3.38651	1.7598	up
Cmxn006627	C15H10O6	Maritimetin	Flavonoids	Aurones	576-02-3	3	81834.8	92299	85024.2	49262.5	61711.4	49407.8	1.17141	0.00397796	0.618857	-0.692323	insig
Lagp002418	C28H32O15	3'-Methoxydaidzin-4'-O-glucoside	Flavonoids	Isoflavones	-	3	8.03702e+06	8.06277e+06	8.2925e+06	9.95249e+07	9.83886e+07	9.84123e+07	1.23847	7.31075e-06	12.1483	3.60269	up
Zajp002650	C27H30O15	Vitexin-7-O-glucoside	Flavonoids	Flavones	-	3	130300	201910	108086	156015	343271	200293	0.740965	0.266476	1.58889	0.668015	insig
mws0856	C21H20O12	Quercetin-4'-O-glucoside (Spiraeoside)*	Flavonoids	Flavonols	20229-56-5	1	1.49865e+07	1.47376e+07	1.44092e+07	1.06466e+07	1.60167e+07	1.53782e+07	0.296514	0.721051	0.952599	-0.0700588	insig
mws0058	C16H12O6	Diosmetin (5,7,3'-Trihydroxy-4'-methoxyflavone)*	Flavonoids	Flavones	520-34-3	3	157800	167178	150087	406994	440462	379065	1.2311	0.00297021	2.58179	1.36837	up
pmf0203	C22H23O11+	Peonidin-3-O-glucoside	Flavonoids	Anthocyanidins	68795-37-9	3	3.15767e+06	3.14205e+06	3.21561e+06	2.15255e+07	2.15956e+07	1.97458e+07	1.23799	0.00114071	6.60691	2.72398	up
Wbtn014060	C23H22O5	Nigrolineaxanthone K	Flavonoids	Other Flavonoids	864516-31-4	2	48240.8	53645.3	43891.3	51675	42856.6	40047.9	0.489449	0.455218	0.923185	-0.115309	insig
Hmcp003458	C20H17NO9	Prolinalin A	Flavonoids	Flavonols	-	3	8340	25005	11670	52402.4	27506.8	48345	1.01988	0.0478759	2.84914	1.51053	up
Hmcn002875	C15H10O7	6-Hydroxyluteolin	Flavonoids	Flavones	18003-33-3	3	62755.9	70573.4	66727.2	473787	671206	535788	1.2324	0.0135585	8.40153	3.07065	up
Lmsp005625	C22H18O13	3-O-Methylellagic acid-4'-O-(5''-O-acetyl)arabinoside	Tannins	Tannin	-	3	130785	141637	155412	153142	178997	185788	0.959444	0.0766418	1.21058	0.275699	insig
HJAP026	C28H32O16	Chrysoeriol-6-C-glucoside-4'-O-glucoside	Flavonoids	Flavones	-	3	7.97952e+06	1.01496e+07	7.87713e+06	4.78499e+06	4.74637e+06	4.40871e+06	1.19271	0.029638	0.536028	-0.89962	insig
mws1731	C15H12O	Chalcone	Flavonoids	Chalcones	94-41-7	3	40157.6	41497.3	42740.7	36569.8	25733.8	26118.4	1.03662	0.071825	0.710813	-0.492459	insig
Lmbn005454	C16H14O5	Naringenin-5-methyl ether	Flavonoids	Flavones	61823-56-1	2	25223.5	17357	15236.9	1918.25	1931.92	3673.48	1.20039	0.0276879	0.130128	-2.942	down
Wmmp000176	C20H18O14	2,3-(s)-hexahydroxydibenzoyl glucose	Tannins	Tannin	-	3	81931.7	90628.1	243348	5223.28	32185	31098	1.00914	0.154385	0.164715	-2.60196	down
pmn001646	C45H38O18	Procyanidin C1	Tannins	Proanthocyanidins	37064-30-5	2	1.24094e+06	1.44126e+06	1.22175e+06	69853.7	634173	224562	1.00795	0.0163401	0.237859	-2.07182	down
Zmjp008503	C18H16O6	5-Hydroxy-4',6,7-trimethoxyflavone (Salvigenin)	Flavonoids	Flavones	19103-54-9	3	7698.51	7513.03	7469.15	9009.46	9681.97	9665.35	1.20777	0.00840085	1.25026	0.322228	insig
pmb1466	C26H22O11	Tricin-4'-O-syringic acid	Flavonoids	Flavones	-	3	3.65962e+06	3.50864e+06	3.85906e+06	1.3158e+06	1.42411e+06	1.4103e+06	1.23494	0.000765343	0.376356	-1.40983	down
Smsp002643	C27H31O14+	Pelargonidin-3-O-rutinoside	Flavonoids	Anthocyanidins	-	3	9	9	9	1.20011e+08	1.27011e+08	1.2464e+08	1.23853	0.000275172	1.37652e+07	23.7145	up
Zjhp090602	C16H14O5	5,7-dihydroxy-3-(4'-hydroxybenzyl)-chroman-4-one(iso-2)	Flavonoids	Other Flavonoids	-	3	409821	312038	382491	1.15991e+06	1036574	1.07501e+06	1.22282	0.000138638	2.96237	1.56675	up
Lmgp004305	C35H44O21	5,7,4'-Trihydroxy-6,8-dimethoxyisoflavone-7-O-galactoside-glucose-rhamnose	Flavonoids	Isoflavones	-	3	81695	51294.7	30010	2.05527e+06	922750	1.79367e+06	1.20858	0.0459981	29.2742	4.87156	up
Hmcp001829	C27H30O15	Quercetin-3,7-Di-O-rhamnoside	Flavonoids	Flavonols	28638-13-3	3	1257195	725743	674735	931375	483630	417261	0.656302	0.327995	0.689425	-0.536535	insig
Hmhp005846	C18H16O7	Tenaxin I*	Flavonoids	Flavones	86926-52-5	3	28660	22501.6	25298.4	34596.8	21976.1	36731.2	0.558198	0.349727	1.2203	0.287235	insig
Lmqn006260	C15H10O7	2',3',4',5,7-Pentahydroxyflavone	Flavonoids	Flavones	-	1	5.85864e+06	6.92305e+06	5.70715e+06	4.90999e+07	7.03629e+07	5.60488e+07	1.23157	0.0137449	9.49284	3.24684	up
MWSslk049	C25H22O10	Silibinin	Flavonoids	Flavanonols	22888-70-6	3	8677.55	9300.49	12500.5	63220.2	60696.2	58358	1.22847	1.32347e-05	5.98042	2.58025	up
pme0460	C15H14O6	Epicatechin*	Flavonoids	Flavanols	490-46-0	1	1.04879e+07	9.78006e+06	9.50614e+06	3.58649e+06	4.62519e+06	4.4612e+06	1.21481	0.00020774	0.425634	-1.23232	down
pmb3012	C22H22O11	Chrysoeriol-7-O-glucoside	Flavonoids	Flavones	19993-32-9	3	1.80073e+07	1.81583e+07	1.6699e+07	3.01218e+07	2.3628e+07	2.53575e+07	1.15515	0.0396394	1.49642	0.581513	insig
pmn001631	C34H22O22	Punicalin	Tannins	Tannin	65995-64-4	3	24981.5	23066.6	23368.2	9687.74	6840.03	6778.18	1.21158	0.0004221	0.326339	-1.61556	down
Lmdp004160	C36H36O20	Quercetin-3-O-(2'''-O-caffeoyl)sophoroside	Flavonoids	Flavonols	-	3	325430	121180	318695	345369	384109	365836	0.703269	0.24021	1.43121	0.517237	insig
Lmjp003655	C22H22O11	6-C-MethylKaempferol-3-glucoside	Flavonoids	Flavones	-	2	1.52626e+07	1.58086e+07	1.55523e+07	2.74628e+07	3.24381e+07	2.86703e+07	1.22351	0.0106364	1.89971	0.925783	insig
MWSslk190	C21H20O10	Oroxin A	Flavonoids	Flavones	57396-78-8	3	547042	552403	464935	105144	177386	125836	1.20375	0.000590699	0.26104	-1.93766	down
MWSHY0136	C21H20O11	Kaempferol-3-O-glucoside (Astragalin)	Flavonoids	Flavonols	480-10-4	3	1.59931e+06	1.53797e+06	6903440	1.21636e+07	1.59208e+07	1.37631e+07	1.06447	0.0114898	4.16778	2.05928	up
pmn001667	C30H26O12	Procyanidin B4	Tannins	Proanthocyanidins	29106-51-2	2	507805	553861	566965	98212.6	396690	213634	0.954876	0.0662418	0.43505	-1.20075	insig
Lmdp004011	C42H46O24	Quercetin-3-O-(6''-O-Caffeoyl)sophoroside-7-O-rhamnoside	Flavonoids	Flavonols	-	3	166594	69101.8	228270	26675	46084.8	38137.5	1.06888	0.124265	0.239021	-2.06479	down
pme3227	C27H30O14	Vitexin-2''-O-rhamnoside	Flavonoids	Flavones	64820-99-1	3	1.08838e+06	1.03798e+06	1.11616e+06	200753	156760	567869	1.08381	0.0244357	0.285389	-1.809	down
pmb0580	C21H20O9	Chrysin-5-O-glucoside (Toringin)*	Flavonoids	Flavones	1329-10-8	3	889569	946840	881836	217925	205358	261711	1.23146	1.87593e-05	0.251999	-1.98851	down
Lmhn005110	C16H12O6	Aracarpene 1*	Flavonoids	Isoflavones	1261245-78-6	3	804704	816376	1.10413e+06	113496	107599	123914	1.23169	0.0147217	0.126599	-2.98166	down
MWSHY0069	C16H12O6	Hispidulin (5,7,4'-Trihydroxy-6-methoxyflavone)*	Flavonoids	Flavones	1447-88-7	3	260706	279175	280208	806826	841988	753949	1.23525	0.00141442	2.92988	1.55084	up
Lmjp004941	C16H12O6	3,5,4'-Trihydroxy-7-methoxyflavone (Rhamnocitrin)	Flavonoids	Flavonols	569-92-6	3	260706	279175	280208	806826	841988	753949	1.23525	0.00141442	2.92988	1.55084	up
mws1361	C21H22O11	Taxifolin-3-O-rhamnoside (Astilbin)	Flavonoids	Flavanonols	29838-67-3	3	177632	127636	119482	312840	356666	336783	1.18952	0.00154585	2.36913	1.24436	up
pmp000638	C20H18O6	8-Prenylkaempferol	Flavonoids	Flavonols	28610-31-3	3	23621.7	28958.1	31772.8	21188.6	20450.2	28020.5	0.734884	0.222503	0.825811	-0.276117	insig
Cmsp007228	C16H14O6	7-O-Methyleriodictyol	Flavonoids	Flavanols	51857-11-5	3	73842	94724.8	47948.9	106057	96691.3	123747	0.895798	0.0952258	1.50795	0.592591	insig
pmb2977	C33H40O19	Chrysoeriol-8-C-arabinoside-7-O-rutinoside	Flavonoids	Flavones	-	3	34135.4	31906.1	30703.7	178681	220423	220546	1.23445	0.00611915	6.40497	2.67919	up
pmp000101	C45H38O18	Arecatannin C1	Tannins	Tannin	87727-69-3	3	1.67952e+06	2.33447e+06	1.92959e+06	216566	557179	509055	1.15239	0.00494397	0.21583	-2.21203	down
Lmsp003881	C33H40O19	Kaempferol-3-O-rutinoside-7-O-rhamnoside	Flavonoids	Flavonols	-	1	2.53238e+07	2.4736e+07	1.84989e+07	7.94568e+06	7.19581e+06	21251520	0.896159	0.128446	0.53083	-0.913678	insig
Wbtp005007	C15H10O8	asperthecin	Flavonoids	Other Flavonoids	10089-00-6	2	9.80513e+06	1.09045e+07	1.14448e+07	706626	1334560	1.06581e+06	1.22244	0.000826876	0.0966275	-3.37142	down
pme0434	C30H26O12	Procyanidin B2*	Tannins	Proanthocyanidins	29106-49-8	1	1.93335e+06	2.2605e+06	2.42707e+06	677266	4.22938e+06	1.38015e+06	0.360275	0.928023	0.949535	-0.0747063	insig
Hmbp002730	C15H10O6	Isoscutellarein	Flavonoids	Flavones	41440-05-5	3	274205	311668	141377	218038	277012	260848	0.212962	0.874494	1.03939	0.0557395	insig
pma6360	C23H24O11	O-MethylChrysoeriol-8-C-glucoside	Flavonoids	Flavones	-	3	57372.5	49486.7	74468.6	492150	358977	491632	1.22281	0.0111685	7.40515	2.88853	up
Lmgp004784	C15H14O5	Apiferol	Flavonoids	Flavones	55167-29-8	1	27179334	2.75872e+07	2.58918e+07	1.31631e+07	1.73558e+07	1.44217e+07	1.191	0.00478653	0.557173	-0.843802	insig
Lmdp004336	C36H36O19	Kaempferol-3-O-(6'''-Caffeoyl)glucosyl-(1→2)-Galactoside	Flavonoids	Flavonols	-	3	1.17914e+06	712751	1.14845e+06	511329	586687	842006	0.880715	0.12291	0.638095	-0.648157	insig
pmb3114	C30H26O11	Epicatechin-epiafzelechin	Flavonoids	Flavanols	-	3	135167	152853	246341	54312.9	110453	84529.7	1.0056	0.0928939	0.46653	-1.09996	down
Lmsp004045	C28H32O16	Isorhamnetin-3-O-glucoside-7-O-rhamnoside*	Flavonoids	Flavonols	17331-71-4	1	1.28495e+07	15705075	1.07306e+07	3.02066e+06	14367375	4.71313e+06	0.785902	0.241968	0.562582	-0.829864	insig
Zmlp003063	C33H40O19	Luteolin-7-O-(2''-O-rhamnosyl)rutinoside	Flavonoids	Flavones	-	2	1.77563e+06	1.73e+06	2.195e+06	2.03115e+06	2.55371e+06	1.48148e+06	0.15591	0.746878	1.06415	0.0897063	insig
MWSslk060	C18H16O7	Eupatilin (5,7-Dihydroxy-3',4',6-Trimethoxyflavone)*	Flavonoids	Flavones	22368-21-4	3	28283.7	34793.8	24053.4	39181.5	32624.6	27828.8	0.524339	0.410374	1.14351	0.193467	insig
mws0895	C21H20O10	Genistein-7-O-Glucoside (Genistin)	Flavonoids	Isoflavones	529-59-9	3	58522.5	65537.6	49814.8	50492.5	70268	57990.3	0.124441	0.8362	1.02804	0.0399004	insig
pme3440	C15H12O5	Butein	Flavonoids	Chalcones	487-52-5	3	203093	204303	200047	95465.9	78507	62818.7	1.20026	0.00511886	0.389817	-1.35913	down
NK10256198	C15H10O6	3,5,7,2'-Tetrahydroxyflavone; Datiscetin	Flavonoids	Flavones	480-15-9	3	93763.4	81547.3	88434.2	64499.3	74872.1	70121.2	1.10044	0.0184292	0.7943	-0.332244	insig
pmn001583	C27H30O16	Quercetin-3-O-robinobioside	Flavonoids	Flavonols	52525-35-6	1	1.01475e+07	1.07315e+07	9.78727e+06	1.17267e+07	1.26597e+07	1.17117e+07	1.1281	0.0127042	1.17713	0.23527	insig
pmp000575	C22H22O10	Acacetin-7-O-glucoside (Tilianin)	Flavonoids	Flavones	4291-60-5	3	92387.2	76466.3	67278.2	256499	209300	137054	1.12995	0.0663742	2.55303	1.35221	up
Cmxn004016	C21H24O11	Dihydromarein	Flavonoids	Chalcones	-	3	1.54314e+06	1.40675e+06	1.65844e+06	1.2265e+06	3.0706e+06	1.69306e+06	0.410736	0.493612	1.29985	0.378349	insig
Xmyn008071	C16H12O6	Gnetifolin B	Flavonoids	Flavones	140671-06-3	3	759993	583101	782072	97309.1	78485.3	107118	1.22844	0.00938448	0.133125	-2.90915	down
pme0321	C21H20O10	Kaempferol-7-O-rhamnoside*	Flavonoids	Flavonols	20196-89-8	3	141265	150757	141123	115360	97546.8	96929.1	1.1651	0.00891985	0.715318	-0.483344	insig
Zahp003766	C26H28O16	Quercetin 3-O-glucoside 7-O-xyloside	Flavonoids	Flavonols	-	3	265823	1.07811e+06	765581	1501210	441266	308870	0.0241664	0.921482	1.06723	0.0938749	insig
HJN049	C30H24O12	2α,3α-Epoxy-5,7,3',4'-tetrahydroxyflavan-(4β-8-catechin)*	Tannins	Proanthocyanidins	-	1	1.84035e+06	3.46259e+06	2.82056e+06	5.23661e+06	1.44365e+07	4.77272e+06	0.967935	0.224026	3.00927	1.58941	insig
pme1598	C22H24O11	Hesperetin-5-O-glucoside	Flavonoids	Flavanones	69651-80-5	2	1.35166e+07	1.39753e+07	1.46145e+07	1.60538e+07	1.62468e+07	1.71973e+07	1.15514	0.0068042	1.17554	0.233329	insig
Lmyp004022	C28H24O15	Kaempferol-3-O-(2''-galloyl)glucoside	Flavonoids	Flavonols	76343-90-3	3	28788.4	39396.9	29994.6	55166.7	39087	68755.3	0.973626	0.114024	1.66031	0.731451	insig
MWSHY0049	C16H14O6	Hesperetin	Flavonoids	Flavanones	520-33-2	2	669936	619653	788550	2.27421e+06	2.79646e+06	3.18707e+06	1.21951	0.0136454	3.97362	1.99046	up
pmp000013	C24H26O12	Eupatilin-7-O-glucoside	Flavonoids	Flavones	-	3	334703	130103	296387	442224	496268	470577	0.939467	0.0674923	1.85113	0.888408	insig
Zmcp003989	C27H30O15	Kaempferol-3-O-rhamnosyl(1→2)glucoside	Flavonoids	Flavonols	-	3	4.63948e+06	521808	1.642e+06	1.24646e+07	7.63841e+06	5.26425e+06	0.949221	0.0802149	3.72868	1.89867	insig
Xmgp006913	C20H20O5	2,4,2',4'-tetrahydroxy-3'-prenylchalcone	Flavonoids	Chalcones	-	3	556472	402141	470982	2.39874e+06	2.74135e+06	2.09345e+06	1.22546	0.00672247	5.05985	2.33909	up
Zbbp006589	C22H24O9	Medicarpin-3-O-Glucoside; Medicocarpin	Flavonoids	Other Flavonoids	52766-70-8	2	533983	550481	553388	252066	181002	282500	1.18184	0.00752615	0.436894	-1.19464	down
Wbtp004648	C20H20O11	Swertianolin	Flavonoids	Other Flavonoids	-	3	128395	78360	52193.2	257591	241488	320365	1.12916	0.00479325	3.16451	1.66198	up
Zblp003803	C15H14O5	2,4,2',5'-Tetrahydroxydihydrochalcone	Flavonoids	Chalcones	-	2	440933	428566	462384	304063	326343	289593	1.20844	0.000725266	0.69075	-0.533763	insig
Lmhp002314	C32H39O19+	Cyanidin-3-O-(2''-O-xylosyl)rutinoside	Flavonoids	Anthocyanidins	-	3	22321.7	8244.67	24088.9	1.11876e+06	383291	204981	1.16347	0.187673	31.2327	4.96499	up
Zbdn007423	C11H12O4	6,7-Dimethoxy-4-chromanone	Flavonoids	Other Flavonoids	-	3	167663	167001	167222	331312	311718	308909	1.23561	0.0021845	1.89672	0.92351	insig
Hmcp001636	C23H24O13	Limocitrin-7-O-glucoside	Flavonoids	Flavonols	-	3	98370	203485	170105	445207	612421	392625	1.13154	0.023646	3.07283	1.61957	up
Lmwp003442	C21H20O11	Amoenin	Flavonoids	Flavonols	-	1	7.48059e+06	6.25501e+06	9.25937e+06	1.72631e+07	2.61322e+07	1.96172e+07	1.17604	0.0277415	2.74027	1.45432	up
Lmlp006175	C21H22O10	Isosalipurposide (Phlorizin Chalcone)	Flavonoids	Chalcones	4547-85-7	3	1.03175e+06	1.35882e+06	1.88988e+06	1.55476e+06	2.45274e+06	2.28419e+06	0.817942	0.14662	1.46987	0.555688	insig
HJN079	C27H32O13	Pinocembrin-7-O-rutinoside	Flavonoids	Flavanones	118985-31-2	3	6397.95	11794.5	5826.99	37490.7	36626	42355.9	1.19309	0.000299816	4.8491	2.27772	up
MWSslk002	C21H20O10	Sophoricoside	Flavonoids	Isoflavones	152-95-4	3	732815	802082	1457425	614236	621980	660394	0.849556	0.254158	0.633826	-0.657842	insig
pmp001111	C27H30O14	Violanthin	Flavonoids	Flavones	40581-17-7	3	490952	504338	1052210	234793	626543	479341	0.609877	0.35047	0.654787	-0.610901	insig
pmn001647	C45H38O18	Procyanidin C2	Tannins	Proanthocyanidins	37064-31-6	2	3.95268e+06	4.50495e+06	3.76177e+06	163245	849501	335328	1.15047	0.000291923	0.110322	-3.1802	down
MWSHY0123	C16H12O5	Wogonin (5,7-Dihydroxy-8-Methoxyflavone)	Flavonoids	Flavones	632-85-9	3	148013	164894	123726	28657.7	37092.2	15738	1.18233	0.00307242	0.186628	-2.42176	down
MWSHY0130	C21H22O11	Taxifolin-7-O-rhamnoside	Flavonoids	Flavanonols	137592-12-2	3	1.01789e+06	975164	1720335	1.03208e+06	1968515	1831710	0.530225	0.3826	1.30132	0.379975	insig
Lmfn004093	C21H24O10	Phloretin-4'-O-glucoside (Trilobatin)	Flavonoids	Chalcones	4192-90-9	2	382197	459229	430703	397071	586135	403602	0.316199	0.609707	1.09015	0.124525	insig
MWSslk075	C15H12O2	4'-Hydroxychalcone	Flavonoids	Chalcones	2657-25-2	3	44587	43992.2	43389.2	2317.11	2951.84	4069.53	1.2296	1.46696e-06	0.070763	-3.82086	down
pma0791	C24H24O13	Naringenin-7-O-(6''-malonyl)glucoside	Flavonoids	Flavanones	-	3	36675	23760.5	31490.1	123529	145563	116359	1.21544	0.00306	4.19308	2.06801	up
Zmxp002867	C28H32O16	Chrysoeriol-5,7-di-O-glucoside	Flavonoids	Flavones	-	3	62407.8	82617.8	38345	1.25254e+06	1274010	1.4841e+06	1.22529	0.00264906	21.8718	4.451	up
pmp001289	C28H28O18	Chrysoeriol-7-O-(2''-O-glucuronyl)glucuronide	Flavonoids	Flavones	-	2	4.20249e+06	4.52392e+06	4.3525e+06	1.50055e+07	1.5001e+07	1.60501e+07	1.23685	0.000500424	3.52144	1.81617	up
pme1605	C27H30O15	Kaempferol-3-O-robinobioside(Biorobin)*	Flavonoids	Flavonols	17297-56-2	1	1.64198e+06	1.50387e+06	1.5373e+06	651535	700700	661215	1.23407	0.000764104	0.429935	-1.21781	down
mws1608	C21H20O11	Luteolin-6-C-glucoside (Isoorientin)	Flavonoids	Flavones	4261-42-1	3	15698.5	15914.6	18762	44856.5	45727.7	21555.1	1.02597	0.119338	2.22609	1.15451	up
MWSslk185	C20H20O8	5-Demethylnobiletin; 5-Hydroxy-6,7,8,3',4'-Pentamethoxyflavone	Flavonoids	Flavones	2174-59-6	3	11227.7	12092.2	17659.6	10000.4	11118.7	8768.41	0.857919	0.20073	0.729326	-0.455365	insig
Hmqn003268	C15H12O7	5,7,3',4',5'-Pentahydroxydihydroflavone	Flavonoids	Flavanones	-	2	195314	398553	201365	973157	364636	602342	0.945516	0.152726	2.43971	1.28671	insig
pmp000583	C22H20O12	Diosmetin-7-O-glucuronide	Flavonoids	Flavones	35110-20-4	3	86352.9	80667.3	133400	121725	73355	57889	0.42183	0.568901	0.842051	-0.248021	insig
Zmzp004111	C16H12O7	Selagin	Flavonoids	Flavones	-	3	9.76168e+06	8.48927e+06	9.72528e+06	4.36464e+06	5.11546e+06	6.66276e+06	1.12257	0.0122098	0.577021	-0.793305	insig
Zmhp003514	C16H12O6	6,7,8-Tetrahydroxy-5-methoxyflavone*	Flavonoids	Flavones	-	3	869711	817544	757927	47108.9	99920.7	46611.4	1.21455	0.000208831	0.0791929	-3.65849	down
pmb3000	C24H24O12	Chrysoeriol-7-O-(6''-acetyl)glucoside	Flavonoids	Flavones	-	3	84540.6	82094.7	130697	435875	292630	380932	1.18963	0.0139315	3.7313	1.89968	up
pmn001477	C20H20O11	4-C-Glucose-1,3,6-trihydroxy-7-methoxyxanthone	Flavonoids	Other Flavonoids	-	3	105197	101448	92484.7	84383.9	96474.7	92350.1	0.786005	0.17079	0.913345	-0.130768	insig
pmp000117	C22H24O9	3,5,6,7,8,3',4'-Heptamethoxyflavone	Flavonoids	Flavonols	1178-24-1	3	29321.2	24430.1	34330	40767.3	23054.5	23173.4	0.117523	0.959462	0.987669	-0.0179011	insig
Lcyp000688	C21H22O9	Verecundin(Pinocembrin-5-glucoside)	Flavonoids	Flavones	-	1	2.94901e+06	3.03011e+06	1.78538e+06	418394	327761	375176	1.21569	0.0309677	0.144417	-2.79168	down
mws0062	C15H10O6	Isoluteolin (Orobol)(5,7,3',4'-tetrahydroxyisoflavone)	Flavonoids	Isoflavones	480-23-9	3	1.219e+06	1.18541e+06	1.07796e+06	792814	845383	809440	1.2043	0.0083735	0.702866	-0.508679	insig
Lmtn002796	C21H22O11	Aromadendrin-7-O-glucoside	Flavonoids	Flavanonols	28189-90-4	2	873241	879998	933700	1.47438e+06	2.51758e+06	1.53745e+06	1.10884	0.106563	2.05789	1.04116	up
Hmcp001947	C31H34O19	Isorhamnetin-3-O-(6''-malonyl)glucoside-7-O-rhamnoside	Flavonoids	Flavonols	-	3	28786.6	63350	53517.6	35086.2	48418.2	28763.8	0.466456	0.41217	0.770786	-0.375597	insig
mws0744	C15H12O8	Dihydromyricetin (Ampelopsin)	Flavonoids	Flavanonols	27200-12-0	3	20680.8	46893.6	21528.1	48097.3	69533.8	67828.8	0.997908	0.0459581	2.08142	1.05757	insig
Ladp003646	C16H14O6	Carpusin	Flavonoids	Other Flavonoids	83889-80-9	2	3.67731e+06	3.26535e+06	3.56504e+06	4.50897e+06	4.40886e+06	5.03101e+06	1.15627	0.0112818	1.32749	0.408696	insig
pme0430	C30H24O12	Procyanidin A1*	Tannins	Proanthocyanidins	103883-03-0	3	120902	121807	134254	428368	675618	568800	1.21792	0.0260326	4.43752	2.14975	up
MWSHY0100	C20H18O11	Avicularin(Quercetin-3-O-α-L-arabinofuranoside)*	Flavonoids	Flavonols	572-30-5	1	31328300	16303890	75490175	49246240	9503750	32326450	0.285712	0.644496	0.739723	-0.434943	insig
Lmdp003509	C20H18O11	Quercetin-3-O-xyloside (Reynoutrin)*	Flavonoids	Flavonols	549-32-6	1	31328300	16303890	75490175	49246240	9503750	32326450	0.285712	0.644496	0.739723	-0.434943	insig
Lmgp004167	C15H14O6	3',4,4',5,7-Pentahydroxyflavan (Luteoforol)	Flavonoids	Flavanols	13392-26-2	3	275299	266007	285370	169209	508627	425698	0.328146	0.46178	1.3349	0.416735	insig
MWSmce090	C16H14O5	Brazilin	Flavonoids	Other Flavonoids	474-07-7	3	28174.5	34960.6	15767.3	167838	424949	143814	1.1582	0.13458	9.33561	3.22274	up
Hmpn005101	C21H24O11	Sieboldin	Flavonoids	Chalcones	18777-73-6	3	2.89168e+06	3.29138e+06	2.85873e+06	3.27304e+06	6.16714e+06	3.37737e+06	0.72983	0.314764	1.41759	0.503439	insig
pmp001311	C27H30O17	6-Hydroxykaempferol-7,6-O-Diglucoside	Flavonoids	Flavonols	-	3	4.13753e+06	4.49523e+06	3.11324e+06	1.26465e+06	1.54661e+06	1.35912e+06	1.2024	0.0223212	0.355047	-1.49392	down
pme2954	C15H10O7	Quercetin	Flavonoids	Flavonols	117-39-5	1	3.87892e+06	2.73393e+06	2.64356e+06	2.88551e+06	3.63434e+06	3.02256e+06	0.181489	0.848098	1.0309	0.0439023	insig
pmp000127	C28H32O16	Chrysoeriol-6,8-di-C-glucoside	Flavonoids	Flavones	-	3	162129	56110.1	61076.9	187823	256170	233056	1.01452	0.040785	2.42395	1.27736	up
Wagp010326	C22H20O9	3,5-Diacetyltambulin	Flavonoids	Flavones	-	3	29372.6	20370.4	26064.8	22132.2	19196.8	19032.5	0.839761	0.17985	0.796244	-0.328717	insig
Xmyp005654	C21H20O11	Kaempferol-4'-O-glucoside	Flavonoids	Flavonols	-	1	1.8978e+08	8.18506e+07	2.03754e+08	218259585	2.42206e+08	7.65307e+08	0.802982	0.294463	2.57849	1.36652	insig
MWSHY0104	C21H20O11	Luteolin-7-O-glucoside (Cynaroside)	Flavonoids	Flavones	5373-11-5	1	1.8978e+08	8.18506e+07	2.03754e+08	218259585	2.42206e+08	7.65307e+08	0.802982	0.294463	2.57849	1.36652	insig
MW0138670	C21H20O11	kaempferol 7-O-glucoside	Flavonoids	Flavones	-	3	1.8978e+08	8.18506e+07	2.03754e+08	218259585	2.42206e+08	7.65307e+08	0.802982	0.294463	2.57849	1.36652	insig
Lmzp004885	C17H14O7	Tricin (5,7,4'-Trihydroxy-3',5'-dimethoxyflavone)	Flavonoids	Flavones	520-32-1	3	66402.1	54041.8	64824.3	65357.8	39901.1	56758.5	0.528241	0.425342	0.874502	-0.193466	insig
Zbdp005176	C16H12O7	Scandione	Flavonoids	Other Flavonoids	-	2	590590	805549	486398	437959	439409	400495	0.95804	0.162898	0.678798	-0.558946	insig
pmp001080	C28H32O15	Diosmetin-7-O-Neohesperidoside (Neodiosmin)	Flavonoids	Flavones	38665-01-9	2	316112	233852	280663	9.70631e+06	1.02134e+07	8.29073e+06	1.23646	0.00389973	33.9628	5.08588	up
Zmwp002963	C45H36O18	Aesculitannin B	Tannins	Tannin	-	3	9.21363e+06	7.61863e+06	8.85439e+06	3.33245e+06	3.15294e+06	3.47147e+06	1.22725	0.00677451	0.387628	-1.36726	down
MWSHY0013	C15H10O4	3,4'-Dihydroxyflavone	Flavonoids	Flavones	14919-49-4	3	100972	111765	169348	132162	63813.7	146149	0.292511	0.708804	0.895415	-0.159372	insig
Lmwp003888	C33H40O21	Kaempferol-3-O-sophoroside-7-O-glucoside	Flavonoids	Flavonols	-	3	14590.2	6148.64	5562.78	13580.8	14310.4	26675	0.893228	0.150689	2.07463	1.05285	insig
Lmyn005006	C30H28O13	Eriodictyol-7-O-(6''-O-p-coumaroyl)glucoside	Flavonoids	Flavanones	-	3	72745.4	104172	84805.2	127111	229363	170734	1.06941	0.0851953	2.01438	1.01034	up
Hmgp002746	C18H16O7	7,3'-Dihydroxy-5,4',5'-trimethoxyxanthone	Flavonoids	Other Flavonoids	-	3	113181	91349.9	115210	106713	95053.5	89358.7	0.553358	0.365691	0.910504	-0.135263	insig
Hmlp005105	C16H12O5	3,7-dihydroxy-4'-methoxyflavone	Flavonoids	Flavones	-	3	365123	382302	361553	656234	609327	413041	1.00101	0.124522	1.51365	0.59803	insig
Lmcp007155	C20H20O7	3',4',5',5,7-Pentamethoxyflavone	Flavonoids	Flavones	53350-26-8	3	14512.7	17666.5	17084.1	20174.7	14659.9	10374	0.349337	0.688759	0.917692	-0.123918	insig
Hmcp001598	C27H30O16	Isorhamnetin-3-O-(2''-O-xylosyl)glucoside	Flavonoids	Flavonols	-	3	49336.4	30010	26675	197064	55416.6	150161	1.01794	0.137299	3.79773	1.92514	up
Wbtp004798	C16H12O6	8,11-dimethoxy-2h-[1,3]dioxolo[4,5-b]xanthen-10-one	Flavonoids	Other Flavonoids	-	2	286188	1.19952e+06	757010	19856180	3.22549e+07	2.89714e+07	1.20381	0.0189201	36.1537	5.17607	up
Wagp009375	C19H18O6	3,5,6,7-Tetramethoxyflavone	Flavonoids	Flavones	75413-07-9	3	15460	26117.8	28242.5	17257.5	30758.4	29136.4	0.23244	0.69571	1.10501	0.144063	insig
Lmmp003487	C27H26O18	Luteolin-7-O-glucuronide-(2→1)-glucuronide	Flavonoids	Flavones	-	3	1.15414e+06	1.09384e+06	1.17108e+06	5.82767e+06	6.61562e+06	6.18424e+06	1.23713	0.00183471	5.44813	2.44576	up
Lmyp004617	C21H22O9	Pinocembrin-7-O-glucoside (Pinocembroside)	Flavonoids	Flavanones	75829-43-5	1	1.53717e+06	1.27425e+06	2.27581e+06	391592	391223	626545	1.16526	0.0471592	0.277039	-1.85184	down
pmn001641	C22H20O12	Kaempferide-3-O-glucuronide	Flavonoids	Flavonols	-	2	29724.5	29240.9	25164.8	22295.5	16010.5	12932	1.04027	0.0383313	0.609032	-0.71541	insig
Zmpn004068	C26H32O14	Phloretin-2'-O-(6''-O-xylosyl)glucoside	Flavonoids	Chalcones	-	3	63317	48491.2	40039	87444.3	79456.2	80517.8	1.09118	0.0307713	1.62939	0.704332	insig
pme3233	C16H12O5	Calycosin	Flavonoids	Isoflavones	20575-57-9	3	307722	365161	268884	620082	591043	473166	1.14362	0.0144026	1.78844	0.838699	insig
Jmgn005927	C15H12O6	2-hydroxynaringenin	Flavonoids	Flavanones	-	2	232818	271995	290250	282819	304393	260677	0.479193	0.455008	1.06644	0.0928058	insig
Smgp005565	C24H20O9	Cinchonain Ia*	Flavonoids	Flavanols	85022-69-1	2	202023	251203	280822	788221	767675	811896	1.22123	0.00018752	3.22566	1.6896	up
MWSslk130	C15H10O4	7,8-Dihydroxyflavone	Flavonoids	Flavones	38183-03-8	3	101982	96526.2	106200	180137	202415	128158	1.08211	0.0868453	1.67606	0.745074	insig
Zmtp102903	C20H18O10	Juglanin	Flavonoids	Flavonols	-	1	1.71695e+06	3.16614e+06	2.57101e+06	1.66928e+06	2.34694e+06	1.62276e+06	0.645106	0.294331	0.756495	-0.402598	insig
pmb1240	C26H30O10	Phellodensin F	Flavonoids	Flavanonols	53846-49-4	3	31675	46505.2	31675	45010	68355	35209.7	0.643069	0.326761	1.35246	0.435586	insig
pmp001006	C16H14O5	1,3,7-Trimethoxyxanthone	Flavonoids	Other Flavonoids	3722-54-1	3	99222.8	112278	88825.1	11089.8	7193.97	14379.4	1.21765	0.00317044	0.108759	-3.20079	down
Lmhp003658	C27H28O14	Monohydroxy-trimethoxyflavone-O-(6''-malonyl)glucoside	Flavonoids	Flavones	-	3	870034	903006	974484	1.25331e+06	1.03844e+06	1.24383e+06	1.07841	0.0475119	1.28682	0.363815	insig
MW0138744	C22H22O13	Laricitrin 3-galactoside	Flavonoids	Flavones	-	3	67652.6	62773.9	60658.5	2.25211e+07	2.44842e+07	2.41767e+07	1.23845	0.000662892	372.515	8.54116	up
pmp000240	C27H28O16	Apigenin-6-C-(2''-glucuronyl)glucoside	Flavonoids	Flavones	-	3	91827.8	49783.1	75692	29376.9	35010	65020	0.83394	0.151228	0.595514	-0.747793	insig
Hmmp002073	C39H50O24	Apigenin-7-O-rutinoside-4'-O-Sophoroside	Flavonoids	Flavones	-	3	198008	74738.3	193556	279237	206820	213500	0.728805	0.187926	1.50022	0.585176	insig
Zmdn002049	C21H24O11	Epicatechin-4'-O-β-D-glucopyranoside*	Flavonoids	Flavanols	-	3	376713	389921	393530	313949	347770	371226	0.942796	0.115094	0.890344	-0.167565	insig
Hmcp002207	C22H22O12	Isorhamnetin-7-O-glucoside (Brassicin)*	Flavonoids	Flavonols	6743-96-0	1	2.61209e+07	3.36653e+07	1.98859e+07	2.11662e+07	3.0504e+07	2.07152e+07	0.271321	0.660088	0.90854	-0.138378	insig
Lmjp003044	C22H22O12	Isorhamnetin-3-O-Glucoside*	Flavonoids	Flavonols	5041-82-7	1	2.61209e+07	3.36653e+07	1.98859e+07	2.11662e+07	3.0504e+07	2.07152e+07	0.271321	0.660088	0.90854	-0.138378	insig
Hmpp003270	C21H20O11	Luteolin-4'-O-glucoside*	Flavonoids	Flavones	6920-38-3	3	50683305	2.63953e+07	24970410	21336270	3.15647e+07	6.07207e+07	0.109442	0.804096	1.1134	0.154975	insig
MWSHY0096	C19H18O8	Chrysosplenetin (5,4'-Dihydroxy-3,6,7,3'-tetramethoxyflavone)	Flavonoids	Flavones	603-56-5	3	16745	8986.46	8173.25	8171.01	6934.79	10630.7	0.519556	0.431619	0.759084	-0.397669	insig
HJAP154	C23H16O11	Galloylisorhamnetin	Flavonoids	Flavonols	-	3	98370	30010	11914.8	1.18656e+06	725888	1.08441e+06	1.16193	0.0180274	21.3611	4.41692	up
Wmkp002590	C27H30O15	5,7-Dihydroxy-4-methoxyflavone-3-O-xylose-(1-6)-glucose	Flavonoids	Flavones	-	3	13894.8	8802.77	13175.9	74965.5	77278.7	84811.1	1.22385	0.000245469	6.6081	2.72423	up
pmb0736	C23H24O12	Tricin-7-O-Glucoside	Flavonoids	Flavones	32769-01-0	3	290650	331131	317559	435683	238074	306956	0.0444474	0.835744	1.04404	0.0621826	insig
pma6216	C22H22O10	Acacetin-6-C-glucoside	Flavonoids	Flavones	-	3	91700	52901.1	58868.8	51524.3	151381	50015	0.163508	0.680841	1.24304	0.313867	insig
pmp000413	C21H20O10	Genistein-8-C-glucoside	Flavonoids	Isoflavones	66026-80-0	3	161440	201625	204883	44339	36820.2	28603.5	1.21903	0.00459001	0.193262	-2.37137	down
mws1292	C26H28O14	Isoschaftoside	Flavonoids	Flavones	52012-29-0	3	68810.2	48404.4	79887.4	45482.5	16675	5005	0.908148	0.0497181	0.34075	-1.55321	insig
Hmcp001578	C28H32O17	Isorhamnetin-3,7-O-diglucoside	Flavonoids	Flavonols	6758-51-6	1	5.37801e+06	4.13533e+06	2.72887e+06	9	9	9	1.23789	0.0334121	2.20549e-06	-18.7905	down
pmf0027	C21H21O11+	Cyanidin-3-O-galactoside*	Flavonoids	Anthocyanidins	142506-26-1	1	293827	306182	308969	4.54246e+06	6.04493e+06	5.25545e+06	1.2365	0.00750719	17.4293	4.12344	up
pmb0550	C21H21O11+	Cyanidin-3-O-glucoside (Kuromanin)*	Flavonoids	Anthocyanidins	47705-70-4	1	293827	306182	308969	4.54246e+06	6.04493e+06	5.25545e+06	1.2365	0.00750719	17.4293	4.12344	up
pmp000964	C15H10O6	Aureusidin	Flavonoids	Aurones	38216-54-5	3	661592	360137	309844	352343	396528	350158	0.343138	0.554502	0.825362	-0.276901	insig
Lmsn004747	C35H30O19	Papuabalanol A	Tannins	Tannin	-	2	309283	290803	248780	147166	185103	178431	1.1577	0.00931515	0.601627	-0.73306	insig
Zmjp004852	C23H24O13	5,6,3',4'-Tetrahydroxy-3,7-dimethoxyflavone-6-O-glucoside	Flavonoids	Flavones	-	3	415541	103375	101710	483566	581104	1.22748e+06	0.991173	0.124913	3.69329	1.88491	insig
Wmmp000173	C41H30O26	eugeniin	Tannins	Tannin	-	3	5078.72	4084.56	4558.3	340262	272127	333787	1.23724	0.00483865	68.9553	6.10759	up
Zmhp006502	C25H24O14	Kaempferide-3-O-(6''-malonyl)glucoside	Flavonoids	Flavonols	-	3	233915	307837	240161	102718	85896.4	108977	1.2066	0.0149666	0.380595	-1.39367	down
pmb0719	C32H34O15	Tricin-4'-O-(syringyl alcohol)ether-5-O-glucoside	Flavonoids	Flavones	-	3	95000.3	105384	110377	15278.5	43945.8	10005	1.0972	0.00819337	0.222774	-2.16635	down
Lmmp003109	C16H16O6	3'-O-Methyl-epicatechin	Flavonoids	Flavanols	76549-34-3	3	1.50061e+06	1.42217e+06	1.42554e+06	1.7418e+06	1943175	1.63789e+06	1.09669	0.0589123	1.22412	0.291747	insig
Lmmp003266	C29H30O19	Quercetin-3-O-(2''-O-malonyl)glucoside-7-O-arabinoside	Flavonoids	Flavonols	-	3	24059.2	20906.5	13340	19486.6	55317.4	20005	0.560223	0.414691	1.62607	0.701386	insig
pmf0472	C26H28O14	Apigenin-7-O-(2''-apiosyl)glucoside (Apiin)*	Flavonoids	Flavones	26544-34-3	3	50628.5	79198.4	93106.9	9	9	9	1.23763	0.0271692	0.000121112	-13.0114	down
Cmxp003975	C21H22O11	Okanin-4'-O-glucoside(Marein)*	Flavonoids	Chalcones	535-96-6	3	12045890	5.84653e+06	5.7485e+06	9662245	6807305	9396995	0.31574	0.767504	1.09414	0.129802	insig
zjgp122004	C21H22O11	Okanin-3'-O-β-D-glucoside*	Flavonoids	Chalcones	-	3	12045890	5.84653e+06	5.7485e+06	9662245	6807305	9396995	0.31574	0.767504	1.09414	0.129802	insig
MWS20145	C21H22O11	Eriodictyol-7-O-glucoside	Flavonoids	Flavanones	38965-51-4	2	12045890	5.84653e+06	5.7485e+06	9662245	6807305	9396995	0.31574	0.767504	1.09414	0.129802	insig
Lmsn006452	C28H28O12	Phloretin-4'-O-(6''-Salicyloyl)glucoside	Flavonoids	Chalcones	-	3	9552.21	8934	11962.3	15534.2	32442.2	23491.1	1.07921	0.102637	2.34716	1.23092	up
Wmkn003942	C21H22O6	2'-HydroxyIsoxanthohumol	Flavonoids	Flavanones	-	3	9668.3	15790	7125.3	18120.6	21108.5	16941.4	0.963235	0.0737227	1.72389	0.785669	insig
pmb0592	C34H42O20	Chrysoeriol-7-O-rutinoside-5-O-glucoside	Flavonoids	Flavones	-	3	5.68507e+06	8.0421e+06	22576255	4.31766e+06	5.29382e+06	8194285	0.65868	0.363386	0.490471	-1.02776	insig
Lmtp002474	C26H28O14	Apigenin-6-C-(2''-glucosyl)arabinoside	Flavonoids	Flavones	-	3	15005	33222.9	43345	14709.5	6738.12	21675	0.789566	0.182191	0.47091	-1.08648	insig
Lmsp003161	C33H40O20	Kaempferol-3-O-sophoroside-7-O-rhamnoside*	Flavonoids	Flavonols	-	3	19407.1	43735.8	114866	1.48332e+06	648238	651842	1.1495	0.0873423	15.6364	3.96683	up
pmp001105	C33H40O20	Kaempferol-3-O-neohesperidoside-7-O-glucoside*	Flavonoids	Flavonols	-	3	19407.1	43735.8	114866	1.48332e+06	648238	651842	1.1495	0.0873423	15.6364	3.96683	up
pmp000588	C25H24O14	Diosmetin-7-O-(6''-malonyl)glucoside	Flavonoids	Flavones	-	3	71892.1	94815.5	69160.8	60300.9	50384.7	38483.7	1.01136	0.0518881	0.632426	-0.661032	insig
pme3285	C15H14O5	Afzelechin (3,5,7,4'-Tetrahydroxyflavan)	Flavonoids	Flavanols	2545-00-8	2	4.46705e+06	4.58797e+06	5.0046e+06	258815	176617	164180	1.23342	0.000957718	0.0426478	-4.55139	down
pmp000729	C30H24O10	Mahuannin A*	Tannins	Proanthocyanidins	-	3	381239	60020	688155	191800	312134	229195	0.0367565	0.54425	0.649124	-0.623435	insig
Zmyn003693	C16H12O4	6-Hydroxy-2'-methoxyflavone	Flavonoids	Flavones	61546-59-6	3	23787.8	17341.3	16682.1	14858.1	11552.5	13862.1	0.984025	0.107589	0.696625	-0.521546	insig
pmp000587	C24H22O14	Luteolin-7-O-(6''-malonyl)glucoside	Flavonoids	Flavones	-	3	84335.9	61685	159573	276536	312300	292156	1.10967	0.0148613	2.88289	1.52751	up
MWSHY0111	C22H22O10	Calycosin-7-O-glucoside	Flavonoids	Isoflavones	20633-67-4	3	267468	128461	180251	459848	362136	407354	1.08206	0.0149709	2.1336	1.09329	up
pmb0672	C37H38O18	Isovitexin-7-O-(6''-feruloyl)glucoside	Flavonoids	Flavones	-	3	1784450	727583	418217	2.95279e+06	3.39355e+06	2.11642e+06	1.00298	0.0302264	2.88807	1.53011	up
Lmzp002365	C22H24O11	Hesperetin-7-O-glucoside	Flavonoids	Flavanones	31712-49-9	3	33551880	1.72554e+07	28155985	7.11219e+07	2.64294e+07	7.53115e+07	0.834295	0.1755	2.18916	1.13037	insig
Lmhp002374	C39H50O25	Quercetin-3-O-glucosyl(1→4)rhamnoside-7-O-rutinoside	Flavonoids	Flavonols	-	3	109074	51618.7	202393	115202	67991	62625.6	0.377675	0.475854	0.677026	-0.562718	insig
MWSHY0128	C19H18O6	5,7,8,4'-Tetramethoxyflavone	Flavonoids	Flavones	6601-66-7	3	15190.5	21808.4	34079.8	41370.7	13210	18547.7	0.0567549	0.950613	1.02884	0.0410138	insig
HJN041	C21H24O11	Epicatechin glucoside*	Flavonoids	Flavanols	-	3	1.45119e+06	1.43897e+06	1.33104e+06	245299	428725	275996	1.20721	0.00021418	0.225059	-2.15162	down
Lmsp004670	C27H30O15	Kaempferol-3-O-glucoside-7-O-rhamnoside*	Flavonoids	Flavonols	2392-95-2	1	2644330	888054	1602300	1.15484e+07	2173125	1.03368e+07	0.926075	0.161929	4.68545	2.22819	insig
Lmsp004137	C15H12O6	3,4,2',4',6'-Pentahydroxychalcone	Flavonoids	Chalcones	73692-51-0	3	415610	502240	399180	609747	839426	599958	1.06372	0.0732796	1.55587	0.637723	insig
Zjmp102035	C17H14O5	5,7-dihydroxy-3-(4'-hydroxybenzyl)-6-methylchromone	Flavonoids	Other Flavonoids	-	3	41375.6	27165.4	25543.3	132085	115265	108758	1.20503	0.000831947	3.78499	1.92029	up
Lmdp002969	C21H20O13	Myricetin-3-O-galactoside*	Flavonoids	Flavonols	15648-86-9	2	9.33985e+06	5.57107e+06	5.93617e+06	5.32977e+06	1570280	1779385	0.95148	0.076816	0.416338	-1.26417	insig
Zmhn001036	C21H22O10	Choerospondin	Flavonoids	Flavanones	81202-36-0	2	444883	397197	360985	312787	255434	250663	1.11491	0.0163603	0.680665	-0.554984	insig
Hmhp007382	C19H18O7	5-Hydroxy-7,8,2',6'-Tetramethoxyflavone (Altisin)*	Flavonoids	Flavones	-	3	8021.24	9428.31	7927.08	11569.9	8114.4	10335.7	0.691282	0.265061	1.18298	0.242426	insig
MWSslk181	C21H22O9	Isoliquiritin	Flavonoids	Chalcones	5041-81-6	3	70020	54898.5	116629	142213	208418	166055	1.05217	0.0268959	2.13906	1.09698	up
pmb0681	C20H18O9	Apigenin-8-C-Arabinoside*	Flavonoids	Flavones	-	3	81471	111606	70020	125060	103992	101710	0.774023	0.209173	1.25719	0.3302	insig
MWSHY0092	C27H32O15	Eriodictyol-7-O-Rutinoside (Eriocitrin)	Flavonoids	Flavanones	13463-28-0	3	2.17162e+06	572820	1701780	5.41078e+06	9.1572e+06	3.28199e+06	1.01735	0.112532	4.01464	2.00527	up
pmp000786	C18H16O7	Eupatorin; 3',5-Dihydroxy-4',6,7-Trimethoxyflavone*	Flavonoids	Flavones	855-96-9	3	22613.8	18905.6	16183.1	25708.9	20793.7	21118.4	0.704429	0.249838	1.17189	0.228836	insig
MWSHY0142	C28H24O16	Quercetin-3-O-(2''-O-galloyl)galactoside	Flavonoids	Flavonols	53209-27-1	3	2603590	2.29668e+06	4062135	3576020	2.98502e+06	2.5025e+06	0.097038	0.960314	1.01129	0.0161901	insig
Lmmp003672	C31H28O12	8,8'-Methylenebiscatechin	Flavonoids	Flavanols	81555-08-0	3	31675	9212.75	8129.37	186283	111547	137719	1.15541	0.0186363	8.88565	3.15148	up
Lmyp004770	C30H26O14	Quercetin-3-O-(2''-O-p-Coumaroyl)glucoside	Flavonoids	Flavonols	-	3	199102	188014	156702	101274	93162.7	95345.9	1.20279	0.0187908	0.532867	-0.908153	insig
Lmhp002800	C28H32O17	2'-Hydoxy-5-methoxyGenistein-4',7-O-diglucoside	Flavonoids	Isoflavones	-	3	1.44265e+06	1.13483e+06	2.27339e+06	46665295	23074310	9.10231e+06	1.15337	0.153217	16.2531	4.02265	up
HJAP005	C22H22O13	Laricitrin-3-O-glucoside	Flavonoids	Flavonols	39986-90-8	3	158149	162351	156760	152280	351302	181412	0.620784	0.380581	1.43526	0.521315	insig
Hmcp001769	C26H28O15	Quercetin-3-O-rhamnosyl(1→2)arabinoside	Flavonoids	Flavonols	-	3	107818	171775	118060	32445.8	110609	55969.1	0.89189	0.0972251	0.500497	-0.998567	insig
Hmlp002975	C28H30O17	Isorhamnetin-3-O-glucuronide-7-O-rhamnoside	Flavonoids	Flavonols	-	3	135060	31856.8	152698	152035	192363	255838	0.757288	0.128222	1.878	0.909194	insig
Lmtp004722	C16H12O8	Mearnsetin	Flavonoids	Flavones	16805-10-0	3	11670	33340	20361.8	178233	90035	133835	1.15347	0.0410428	6.15101	2.62082	up
Zmhp004034	C21H20O12	Rhodiolgin	Flavonoids	Flavonols	94696-39-6	1	1801325	646404	1951620	1210125	2223900	2897520	0.52486	0.373204	1.4392	0.525268	insig
Lmmp002995	C30H32O20	Quercetin-7-O-(2''-malonyl)glucosyl-5-O-glucoside	Flavonoids	Flavonols	-	3	11154.2	48345	26769.4	38917.1	19810.4	26220.1	0.144036	0.973372	0.984687	-0.0222624	insig
pmb0673	C20H18O9	Apigenin-6-C-arabinoside*	Flavonoids	Flavones	-	3	81945.1	65020	61635.6	114619	69052.8	66801.4	0.467148	0.474564	1.20073	0.263915	insig
MWSHY0121	C21H18O12	Luteolin-7-O-glucuronide	Flavonoids	Flavones	29741-10-4	3	313685	135619	135633	78121.2	70949.5	68271.3	1.05024	0.174707	0.371565	-1.42831	down
Zmsp004363	C23H22O13	Quercetin-3-O-(6''-O-acetyl)glucoside	Flavonoids	Flavonols	-	1	1889120	2.1508e+06	2.08823e+06	1.23958e+06	2.424e+06	2.29515e+06	0.193068	0.895425	0.972355	-0.0404453	insig
Lmcp004624	C16H12O6	3-Methylkaempferol	Flavonoids	Flavonols	1592-70-7	2	95035	57526.3	86950.8	2.36336e+06	4019280	2291630	1.22813	0.0379541	36.2164	5.17857	up
Lmtp004126	C24H22O16	Myricetin-3-O-(6''-malony)glucoside	Flavonoids	Flavonols	-	3	11670	10005	11670	25005	20005	6290.49	0.384236	0.396717	1.53848	0.621502	insig
HJAP064	C25H24O15	Isorhamnetin-3-O-(6''-malonyl)glucoside	Flavonoids	Flavonols	-	3	99974	81317.3	189297	66104.8	305330	9	0.516521	0.997904	1.00231	0.00332849	insig
Zmgp002857	C33H40O20	Quercetin-3-O-α-rhamnosyl (1→2)-[α-rhamnosyl (1→6)]-β-glucoside	Flavonoids	Flavonols	-	2	6.00729e+06	2.58279e+06	3.10771e+06	2.39778e+06	12433920	2.36229e+06	0.132391	0.646524	1.46985	0.555669	insig
Wbtp006052	C15H10O6	Protoapigenone	Flavonoids	Other Flavonoids	-	3	1.10046e+07	1.2404e+07	1.16444e+07	1.62054e+07	2.24007e+07	1.78384e+07	1.13618	0.0555599	1.61026	0.687292	insig
Hmcp002539	C22H22O11	Isorhamnetin-3-O-rhamnoside	Flavonoids	Flavonols	-	3	1.23896e+06	559918	783600	400977	313484	197618	1.05921	0.0981664	0.35318	-1.50152	down
mws1422	C15H14O5	Epiafzelechin	Flavonoids	Flavanols	24808-04-6	3	66685	60531.4	63350	124609	143042	138535	1.22808	0.00311609	2.13147	1.09185	up
mws0052	C21H18O11	Baicalin	Flavonoids	Flavones	21967-41-9	3	48011.6	50454.9	90256.4	63350	36559.1	91154.3	0.0257567	0.972016	1.0124	0.0177819	insig
Laxp005049	C15H10O7	Bracteatin	Flavonoids	Other Flavonoids	3260-50-2	1	2.71172e+06	2.81898e+06	2.97083e+06	4.62323e+06	5.04392e+06	3.22673e+06	1.01753	0.114018	1.51665	0.600892	insig
MWSslk182	C18H16O5	5,6,7-Trimethoxyflavone	Flavonoids	Flavones	973-67-1	3	9899.87	12338.9	4668.75	210615	123169	79392.4	1.18723	0.0787338	15.3554	3.94068	up
pmp000100	C45H38O18	Arecatannin B1	Tannins	Tannin	79763-28-3	3	1.27998e+07	1.44791e+07	11548447	66926.2	178788	173368	1.22604	0.00431088	0.0107935	-6.5337	down
pmb0662	C37H38O19	Isoorientin-7-O-(6''-feruloyl)glucoside	Flavonoids	Flavones	-	3	31842.5	22515.3	41680	20005	21863	11941.5	0.922373	0.108978	0.560294	-0.835743	insig
Lacn005887	C26H30O12	Noricariside	Flavonoids	Flavonols	-	3	118146	84366	206893	71642.2	79814.2	134967	0.557005	0.395153	0.699609	-0.515379	insig
Zmdn002400	C21H24O11	Epicatechin-3'-O-β-D-glucopyranoside*	Flavonoids	Flavanols	-	3	1.17628e+06	1.49959e+06	1.16683e+06	223856	316979	344237	1.21217	0.00708993	0.230326	-2.11825	down
Zmdn002353	C21H24O11	Epicatechin-6-C-β-D-glucopyranoside*	Flavonoids	Flavanols	-	3	1.17628e+06	1.49959e+06	1.16683e+06	223856	316979	344237	1.21217	0.00708993	0.230326	-2.11825	down
Lmmp002755	C33H40O21	Quercetin-7-O-rutinoside-4'-O-glucoside	Flavonoids	Flavonols	-	3	448293	552328	412564	755335	728530	308079	0.332339	0.479412	1.26802	0.342574	insig
MWSHY0201	C27H30O14	Kaempferol-3,7-O-dirhamnoside (Kaempferitrin)	Flavonoids	Flavonols	482-38-2	2	178450	97021.8	228300	154667	242479	106802	0.0108971	0.999205	1.00035	0.000502461	insig
Lmhn004976	C16H12O6	Aracarpene 2*	Flavonoids	Isoflavones	-	3	713601	767072	779879	77590.5	101347	124189	1.22729	3.77758e-05	0.134094	-2.89869	down
Lmcp004369	C17H14O7	Quercetin-3',4'-dimethyl ether	Flavonoids	Flavonols	3306-29-4	3	174611	176780	138833	217674	286764	222006	1.06102	0.0513096	1.48186	0.567414	insig
Zmjp004610	C25H28O13	5,4'-Dihydroxy-3,6,7,3'-tetramethoxyflavone-4'-O-glucoside	Flavonoids	Flavones	23279-19-8	3	118390	104251	86700	659378	749139	638080	1.23173	0.0020044	6.616	2.72596	up
HJAP128	C34H42O20	Isorhamnetin-3-O-rutinoside-7-O-rhamnoside	Flavonoids	Flavonols	-	1	6.56093e+06	5.10903e+06	4.00344e+06	806540	1.14388e+06	422490	1.17349	0.0203739	0.151397	-2.72359	down
pmb3042	C23H24O12	Tricin-5-O-Glucoside	Flavonoids	Flavones	32769-00-9	3	181579	107279	170244	185676	168637	193902	0.630014	0.327221	1.1941	0.255926	insig
pmp000980	C27H32O12	Maohuoside A	Flavonoids	Flavonols	128988-55-6	3	467435	492520	487505	282704	319462	233608	1.17446	0.00946916	0.577407	-0.79234	insig
pmp000596	C27H30O17	Quercetin-3-O-(2''-O-galactosyl)glucoside	Flavonoids	Flavonols	56782-99-1	3	498492	510611	420713	2.37668e+06	2.88032e+06	2.27879e+06	1.23102	0.00723143	5.27046	2.39793	up
Zmcp002666	C27H30O17	Quercetin-3,7-Di-O-glucoside	Flavonoids	Flavonols	-	1	2.4949e+06	3.1517e+06	3.0589e+06	1.21525e+06	1.21213e+06	934207	1.20445	0.00544837	0.386145	-1.37279	down
pmb0648	C22H22O12	Isorhamnetin-8-C-glucoside	Flavonoids	Flavonols	-	3	2.66566e+06	2.83169e+06	2.64313e+06	1.17943e+06	883050	697601	1.19303	0.00214949	0.339057	-1.5604	down
pmp000731	C30H24O10	Mahuannin C*	Tannins	Proanthocyanidins	87686-71-3	3	394000	344953	562904	196612	309408	283774	0.960898	0.10535	0.606667	-0.721023	insig
Hmdn001667	C20H16O13	Ellagic acid-4-O-glucoside	Tannins	Tannin	-	3	1.23512e+06	868612	1.3709e+06	1.60248e+06	1.27063e+06	1.60787e+06	0.796481	0.153087	1.28963	0.366953	insig
Lmdp003286	C21H20O12	Isohyperoside	Flavonoids	Flavonols	35589-21-0	3	406858695	3.26501e+08	5.82118e+08	6.41027e+08	6.52104e+08	3.55013e+08	0.477168	0.421492	1.25289	0.325255	insig
HJAP018	C23H22O14	Myricetin-3-O-(6''-acetyl)glucoside	Flavonoids	Flavonols	-	3	141150	145313	42669.1	61987	66685	46821.8	0.636655	0.264503	0.533202	-0.907247	insig
Hmcp005575	C27H30O17	Quercetin-5,4'-di-O-glucoside	Flavonoids	Flavonols	-	2	1.95036e+06	1.46489e+06	2.00878e+06	2.96538e+06	3.4015e+06	3.14477e+06	1.15849	0.00414817	1.75361	0.810329	insig
Lmfn003760	C21H18O13	Quercetin-4'-O-glucuronide	Flavonoids	Flavonols	201463-36-7	3	120320	123353	134382	159739	118522	167099	0.693927	0.273124	1.17803	0.23638	insig
HJAP006	C23H24O13	Syringetin-7-O-glucoside	Flavonoids	Flavonols	-	3	472455	173279	312278	490594	587651	871152	0.928294	0.0870962	2.03484	1.02491	insig
Xmyp005599	C27H30O16	Kaempferol-3-O-galactoside-4'-O-glucoside	Flavonoids	Flavonols	-	3	91700	35119.2	135004	432325	874345	402240	1.11666	0.0823725	6.52696	2.70641	up
pmp000273	C30H26O11	Gambiriin B3	Tannins	Tannin	76236-90-3	2	724049	594056	402240	59672.8	80844.2	79724.3	1.21509	0.0326141	0.128022	-2.96554	down
Lmsp009394	C20H22O7	3',4',5,6,7-Pentamethoxyflavanone	Flavonoids	Flavanones	-	3	62923.8	36701	44683	31015.1	32770.8	32021.2	0.954432	0.172108	0.663907	-0.590946	insig
Lmsp010393	C19H18O7	Eupatorin-5-methylether (3'-hydroxy-5,6,7,4'-tetramethoxyflavone)	Flavonoids	Flavones	21764-09-0	3	43728.9	40304.9	34797.8	43991.6	51295.6	51598	0.971311	0.0602655	1.23608	0.305772	insig
MWSHY0023	C15H10O5	Baicalein	Flavonoids	Flavones	491-67-8	3	14667.7	29817.5	23684.3	44457.8	38468.1	29738.1	0.917831	0.0729703	1.6527	0.724828	insig
HJAP112	C23H22O12	Quercetin-3-O-(2''-O-acetyl)rhamnoside	Flavonoids	Flavonols	-	3	72913.7	156720	47474.6	38554.6	47623.5	26846.3	0.888576	0.236867	0.407871	-1.29382	insig
MWSHY0056	C27H32O14	Naringenin-7-O-Rutinoside(Narirutin)	Flavonoids	Flavanones	14259-46-2	3	15005	7622.42	6670	50164.9	61685	53202.2	1.19097	0.000669758	5.63368	2.49408	up
MWSHY0180	C22H22O10	Glycitin	Flavonoids	Isoflavones	40246-10-4	3	288630	280280	352105	281049	455735	428985	0.676297	0.269946	1.26574	0.339985	insig
mws1173	C15H12O5	Garbanzol	Flavonoids	Flavonols	1226-22-8	3	130693	106201	135958	203873	191748	188966	1.16858	0.00670013	1.56788	0.648816	insig
Lmlp005572	C21H20O10	Galangin-7-O-glucoside	Flavonoids	Flavones	-	2	964930	1314375	1117705	532230	588459	673260	1.1687	0.0218309	0.528097	-0.921126	insig
Lmmp002560	C27H28O18	Quercetin-3-O-(2''-O-glucosyl)glucuronide	Flavonoids	Flavonols	-	3	101377	135794	149887	46942.8	28068.7	40538.3	1.18201	0.0148885	0.298533	-1.74404	down
Lmdp004892	C24H22O14	Kaempferol-3-O-(6''-malonyl)galactoside*	Flavonoids	Flavonols	-	1	105071	100841	112029	268946	138405	143550	0.934577	0.20988	1.73271	0.793034	insig
pma6218	C21H22O9	O-MethylNaringenin-8-C-arabinoside	Flavonoids	Flavanones	-	3	86242.5	84477	79196.4	123390	100040	116745	1.13091	0.0397984	1.36116	0.444835	insig
Hmgp002036	C22H22O12	Nepetin-7-O-glucoside(Nepitrin)	Flavonoids	Flavones	569-90-4	3	2.82007e+07	3.45145e+07	9	9	9	9	0.874665	0.18761	4.30517e-07	-21.1474	insig
Ladp004020	C22H22O12	tenuiflorin C glucoside	Flavonoids	Other Flavonoids	-	3	2.82007e+07	3.45145e+07	9	9	9	9	0.874665	0.18761	4.30517e-07	-21.1474	insig
pmp000589	C24H22O15	Quercetin-7-O-(6''-malonyl)glucoside	Flavonoids	Flavonols	-	3	18345.2	35010	18403.9	335575	835785	656515	1.2107	0.056976	25.4724	4.67086	up
Lmnp002627	C22H22O12	5,7,3',4'-Tetrahydroxy-6-methoxyflavone-8-C-glucoside	Flavonoids	Flavones	-	3	227127	279479	258416	70870.4	105972	105987	1.18913	0.0014601	0.369701	-1.43557	down
Lssp210101	C20H20O5	Kushenol S	Flavonoids	Other Flavonoids	254886-72-1	3	591230	432201	404221	757010	495199	1000170	0.833153	0.191293	1.57768	0.657805	insig
HJAP148	C26H28O15	Kaempferol-3-O-sambubioside	Flavonoids	Flavonols	27661-51-4	3	67271.1	66476.7	66991.7	211112	144616	166770	1.20561	0.0316369	2.60287	1.3801	up
pmb0603	C28H32O16	Chrysoeriol-7,4'-di-O-glucoside	Flavonoids	Flavones	-	3	64765.3	46680	28340	257520	323733	397225	1.19523	0.0153714	6.99987	2.80733	up
Zmhp003716	C27H30O16	Rhodionidin	Flavonoids	Flavonols	-	1	1.36674e+07	3.85303e+06	15742200	5.46221e+06	11749210	4.65194e+06	0.375293	0.436133	0.657296	-0.605386	insig
Zmxp004480	C28H32O16	Chrysoeriol-7-O-gentiobioside	Flavonoids	Flavones	-	3	69400	43910.7	43612.4	333378	354965	490139	1.2164	0.0177288	7.50994	2.9088	up
pmp000120	C22H22O11	Diosmetin-6-C-glucoside	Flavonoids	Flavones	-	3	1.54475e+06	1.82049e+06	1.70172e+06	495505	404483	408387	1.22992	0.00158032	0.258217	-1.95335	down
pma0795	C24H22O15	Tricetin-5-O-(6''-malonyl)glucoside	Flavonoids	Flavones	-	3	40580.9	69003.4	62168	172572	94764.6	178050	1.0796	0.0656305	2.59319	1.37473	up
mws1299	C21H20O11	Luteolin-8-C-glucoside (Orientin)	Flavonoids	Flavones	28608-75-5	3	3.90272e+06	7288620	4.46917e+06	1.21131e+06	2025980	2120680	1.11252	0.0725643	0.342133	-1.54737	down
Lmnp002584	C28H32O16	Hispidulin-8-C-(2''-O-glucosyl)glucoside	Flavonoids	Flavones	-	3	8.53524e+06	7.79204e+06	8.43793e+06	3186940	3.95718e+06	4.92623e+06	1.16881	0.00577396	0.487392	-1.03685	down
Lmgp004959	C29H34O16	Tricin-7-O-neohesperidoside	Flavonoids	Flavones	53766-40-8	3	618596	676679	744132	562419	1422070	1364845	0.696775	0.255069	1.64231	0.715724	insig
Lmmp003817	C24H22O14	Kaempferol-3-O-(6''-malonyl)glucoside*	Flavonoids	Flavonols	-	1	129115	95232.5	90313.3	299003	350269	200896	1.14903	0.046696	2.70185	1.43395	up
Wbtp004352	C16H14O7	1,3-dihydroxy-4,6,8-trimethoxyxanthen-9-one	Flavonoids	Other Flavonoids	-	2	183455	293640	225185	388830	242902	314938	0.756974	0.203805	1.34799	0.430814	insig
pmb0634	C43H48O24	Isoorientin-7-O-(6''-feruloyl)glucoside-O-glucoside	Flavonoids	Flavones	-	3	150240	99211.5	138998	94188.9	103319	100831	0.854278	0.188708	0.768025	-0.380775	insig
Wagp004984	C24H26O14	Limocitrol 3-Glucoside	Flavonoids	Flavones	-	2	314568	270312	344373	723011	882827	823294	1.21688	0.00299158	2.61407	1.3863	up
Cmhn002124	C41H26O26	Praecoxin D	Tannins	Tannin	-	3	20180.8	25899.6	27749.3	11103.2	6347.9	18768.6	0.960185	0.0527625	0.490583	-1.02743	insig
Zmpn004713	C15H10O7	Isoetin (5,7,2',4',5'-Pentahydroxyflavone)	Flavonoids	Flavones	1621-84-7	3	51582.5	58446.3	41849.2	275713	125115	372824	1.13185	0.101964	5.0939	2.34877	up
Smgp004575	C21H20O12	Quercetin-5-O-β-D-glucoside	Flavonoids	Flavonols	-	1	3.12276e+06	1.20391e+06	2.14381e+06	2.08725e+06	1.8686e+06	6.24855e+06	0.447311	0.483649	1.57707	0.657249	insig
Lmsp004632	C15H10O6	Scutellarein (5,6,7,4'-Tetrahydroxyflavone)	Flavonoids	Flavones	529-53-3	1	3.73436e+06	3.69915e+06	4.40631e+06	1.30688e+06	3127305	1.08169e+06	0.984319	0.0694202	0.465875	-1.10199	insig
Zmjp003031	C27H30O16	Orientin-2''-O-galactoside	Flavonoids	Flavones	-	3	17591420	1.02745e+07	10995600	5.02064e+06	7.51465e+06	9.00714e+06	0.95623	0.115049	0.554338	-0.851163	insig
Wahp004841	C22H24O11	Homeriodictyol-7-O-β-O-glucoside	Flavonoids	Flavanones	-	3	16901370	1.30395e+07	1.95711e+07	2.27933e+07	2.78174e+07	2.10747e+07	0.984013	0.056292	1.44784	0.533902	insig
Hmlp002821	C21H18O14	Myricetin-3-O-glucuronide	Flavonoids	Flavonols	77363-65-6	3	12351	15345.6	38345	26616.8	15234.6	26385.2	0.197011	0.940854	1.03324	0.0471707	insig
Lmfp004055	C20H18O11	Morin-3-O-xyloside	Flavonoids	Flavonols	-	3	1.38491e+07	4.93735e+06	3.89518e+06	9.14396e+06	1.24273e+07	8.20758e+06	0.567066	0.543677	1.31291	0.392764	insig
Lmgp005868	C32H30O14	Chrysoeriol-7-O-(6''-feruloyl)glucoside	Flavonoids	Flavones	-	3	9557.87	10223.2	12831.6	51262	27603	41707.7	1.18004	0.0481431	3.69712	1.8864	up
MW0139483	C27H30O16	Quercetin 3-(2-glucosylrhamnoside)	Flavonoids	Flavones	143016-74-4	3	4.23174e+07	1.54156e+08	1.02823e+08	98105095	8.50967e+07	9.34935e+07	0.0783098	0.837944	0.924485	-0.113279	insig
Lmsp004915	C21H20O11	Aureusidin-4-O-glucoside	Flavonoids	Aurones	-	3	47892455	3.25837e+07	2.02122e+07	103443785	2.62837e+07	45132761	0.537112	0.402465	1.73665	0.796305	insig
Lmbp002336	C27H30O16	Quercetin-3-O-(2''-O-rhamnosyl)galactoside	Flavonoids	Flavonols	-	2	1.2372e+07	1.63357e+07	4.7608e+06	3.91717e+06	4.57207e+06	6.98823e+06	0.788835	0.214176	0.462449	-1.11263	insig
Layp003352	C32H38O20	Kaempferol-xylosyl glucosyl glucoside	Flavonoids	Flavonols	-	2	1749015	291691	438314	320345	271864	282738	0.691126	0.367711	0.35294	-1.5025	insig
pme3400	C22H22O10	Biochanin A-7-O-glucoside (Sissotrin)	Flavonoids	Isoflavones	5928-26-7	3	66569.9	30156.9	44679	64902.1	46933.3	75067.1	0.624015	0.32465	1.32175	0.402445	insig
Lmyp006086	C22H22O10	Prunetin-5-O-glucoside	Flavonoids	Isoflavones	-	3	66569.9	30156.9	44679	64902.1	46933.3	75067.1	0.624015	0.32465	1.32175	0.402445	insig
Cmhp002692	C28H32O17	Madreselvin A	Flavonoids	Flavones	188682-83-9	2	3.79598e+06	4.07823e+06	3.77676e+06	788125	1.00869e+06	1.08319e+06	1.2264	2.62021e-05	0.24719	-2.01631	down
pmb1108	C33H40O21	Luteolin-6,8-di-C-glucoside-7-O-glucoside	Flavonoids	Flavones	-	3	5569.34	879.756	9847.07	228339	113699	230750	1.15308	0.040179	35.1486	5.1354	up
Zmjp004875	C17H14O8	5,6,3',4'-Tetrahydroxy-3,7-dimethoxyflavone	Flavonoids	Flavones	-	3	16675	24505.6	46680	166241	163933	240205	1.17356	0.0149176	6.49187	2.69863	up
Lnrp102163	C33H40O20	Quercetin-3-O-rutinoside-7-O-rhamnoside	Flavonoids	Flavonols	-	2	4343600	2323810	5.95467e+06	6454770	1.7311e+06	3.46223e+06	0.192911	0.861207	0.922836	-0.115854	insig
Zmxp003107	C27H30O16	Luteolin-7,3'-di-O-glucoside*	Flavonoids	Flavones	52187-80-1	2	300320	1619155	217459	1.28724e+06	621790	1.68281e+06	0.64653	0.433506	1.68084	0.749182	insig
Lmdp004550	C41H42O24	Quercetin-3-O-(6''-O-sinapoyl)glucoside-7-O-(6''-O-malonyl)glucoside	Flavonoids	Flavonols	-	3	40010	68355	23340	26675	14898.1	8340	0.907482	0.162561	0.378977	-1.39982	insig
pma6576	C17H14O8	Spinacetin	Flavonoids	Flavonols	3153-83-1	3	164747	216264	179511	97899.5	79727.8	85183.2	1.19744	0.0148309	0.468868	-1.09275	down
pmb0713	C29H34O17	Tricin-7-O-(2''-O-glucosyl)glucoside	Flavonoids	Flavones	-	3	63200.4	18340	46680	158425	73355	108380	0.954855	0.0843706	2.65293	1.40759	insig
pmp000394	C26H30O13	Naringenin-7-O-(2''-O-apiosyl)glucoside	Flavonoids	Flavanones	-	3	16718.1	26675	33340	21840	17863.2	15005	0.693732	0.265275	0.712967	-0.488092	insig
Wbtp005613	C15H10O7	robustaquinone F	Flavonoids	Other Flavonoids	-	2	2.90262e+06	2.79739e+06	5.33493e+06	6.51369e+06	4.56411e+06	3.45956e+06	0.569579	0.392454	1.31739	0.397685	insig
pma6640	C22H22O12	3'-O-Methyltricetin-7-O-glucoside	Flavonoids	Flavones	-	3	1.40606e+07	46930395	84115635	21888275	13320770	12352240	0.786936	0.24773	0.327768	-1.60925	insig
Lmjp002867	C27H30O15	Kaempferol-3-O-neohesperidoside*	Flavonoids	Flavonols	32602-81-6	1	5473230	7290375	1411970	6669330	5.10615e+06	12138275	0.625271	0.305747	1.68697	0.754433	insig
Wbtn006160	C14H10O4	5-hydroxy-2-methoxyxanthen-9-one	Flavonoids	Other Flavonoids	141766-17-8	3	57207.9	63753.8	82113	64200.6	48625.4	60527.1	0.610568	0.334497	0.853642	-0.228297	insig
HJAP156	C22H22O12	Laricitrin-3-O-rhamnoside	Flavonoids	Flavonols	-	3	35010	16675	43511.7	140501	221845	230190	1.16859	0.0220545	6.22434	2.63792	up
Zmhp002401	C29H32O16	Viscumneoside IV(Rhamnazin-3-O-(6''-hydroxymethylglutaryl)glucoside)	Flavonoids	Flavonols	119725-29-0	3	9.86111e+06	9.54363e+06	1.00825e+07	7.8103e+06	14117425	6.67517e+06	0.221805	0.910423	0.970008	-0.0439317	insig
Lazp002926	C30H34O17	Chrysoeriol glucosyl acetyl glucoside	Flavonoids	Flavones	-	2	56868.1	82010.6	33167.1	9	9	9	1.23624	0.055498	0.000156935	-12.6375	down
MWSslk254	C27H30O15	Kaempferol-3-O-glucorhamnoside*	Flavonoids	Flavonols	40437-72-7	1	5939720	911158	857244	3.38309e+06	4.74095e+06	4.27603e+06	0.711437	0.453429	1.6087	0.685896	insig
Lmjp002906	C22H22O12	Rhamnetin-3-O-Glucoside*	Flavonoids	Flavonols	27875-34-9	1	62573840	1.73992e+07	2.99588e+07	3.35412e+07	3.5962e+07	1.81617e+07	0.185179	0.649596	0.797447	-0.32654	insig
Lajp002779	C45H38O19	Gallocatechin-(4α->8)-Catechin-(4α->8)-Catechin	Flavonoids	Flavanols	87421-89-4	2	223198	390807	309331	9	9	9	1.23801	0.0238407	2.92418e-05	-15.0616	down
Hmdp001794	C35H28O20	Quercetin-3-O-(2'',3''-O-digalloyl)-glucoside	Flavonoids	Flavonols	-	3	76690	74173.2	20005	52695.8	33075.2	119477	0.210646	0.740462	1.2012	0.264482	insig
Lmsp004247	C27H30O15	Isorhamnetin-3-O-arabinoside-7-O-rhamnoside	Flavonoids	Flavonols	-	3	9	13200.3	5005	26395.3	38345	26407.9	0.759723	0.0117922	5.00422	2.32314	insig
Zmsp007375	C20H20O7	3,5,7,3'4'-Pentamethoxyflavone	Flavonoids	Flavones	1247-97-8	3	14397.4	12353.2	22985.1	15943.7	13432.4	10025.6	0.522037	0.417801	0.792221	-0.336025	insig
MWSHY0189	C21H20O10	Apigenin-7-O-glucoside(Cosmosiin)*	Flavonoids	Flavones	578-74-5	2	596507	1027030	625996	651968	533479	432477	0.738348	0.267686	0.719226	-0.475482	insig
MWS20148	C21H20O10	Apigenin-4'-O-glucoside*	Flavonoids	Flavones	-	2	596507	1027030	625996	651968	533479	432477	0.738348	0.267686	0.719226	-0.475482	insig
Lmsp003939	C28H32O16	Isorhamnetin-3-O-galactoide-7-O-rhamnoside*	Flavonoids	Flavonols	-	1	1.13146e+07	18152540	1.33041e+07	4.11931e+06	6357185	6.40968e+06	1.13695	0.0382367	0.394803	-1.3408	down
pmb0554	C24H23O13+	Pelargonidin-3-O-(6''-O-malonyl)glucoside	Flavonoids	Anthocyanidins	165070-68-8	3	720815	692284	704409	227911	226566	267773	1.23218	4.04747e-05	0.341085	-1.5518	down
Hmjp003008	C27H28O16	Luteolin-7-O-glucuronide-5-O-rhamnoside	Flavonoids	Flavones	-	3	30010	33431.4	41457.7	257927	155090	273600	1.20885	0.0339038	6.54551	2.7105	up
Hmdp103165	C33H40O19	Clitorin	Flavonoids	Flavones	55804-74-5	3	90654405	1.0664e+07	8.04073e+06	6.56598e+06	7.43466e+06	8.71607e+06	0.657559	0.398336	0.207726	-2.26725	insig
pmp000275	C30H28O12	Gambiriin A1	Tannins	Tannin	76250-49-2	3	158737	196112	195197	21085.6	47049.3	9559.49	1.13564	0.000720399	0.141251	-2.82367	down
Lmgp003803	C29H34O17	5,7,4'-Trihydroxy-6,8-dimethoxyisoflavone-7-O-galactoside-rhamnose	Flavonoids	Isoflavones	-	3	36157.6	50015	76690	96572.1	163430	113385	1.04876	0.0517807	2.29265	1.19702	up
Lmsn002578	C41H30O26	Tellimagrandin II	Tannins	Tannin	81571-72-4	3	11999	34052.6	44801.9	8480.76	5528.83	11778.6	0.977607	0.14957	0.283844	-1.81683	insig
HJAP127	C33H40O20	Quercetin-3-O-(2''-O-Rhamnosyl)rutinoside	Flavonoids	Flavonols	55696-57-6	1	2.43902e+07	6.38091e+07	2.81544e+07	2.47024e+07	2.00079e+07	3.75601e+07	0.469496	0.471787	0.707072	-0.500072	insig
Lmyp004052	C30H26O14	Quercetin-3-O-(6''-O-p-Coumaroyl)galactoside	Flavonoids	Flavonols	-	3	151479	129697	114421	160255	166183	122079	0.544579	0.373917	1.13377	0.18113	insig
HJAP011	C22H22O11	Chrysoeriol-8-C-glucoside (Scoparin)	Flavonoids	Flavones	301-16-6	3	58955.3	69336.8	48396.6	860935	1015280	837460	1.23398	0.00396891	15.3585	3.94097	up
Lmlp003531	C21H20O11	Luteolin-3'-O-glucoside*	Flavonoids	Flavones	-	3	1.02336e+07	2.17788e+07	8.15226e+06	1.7436e+07	1.72998e+07	2.21454e+07	0.712319	0.319649	1.4162	0.502026	insig
MWSHY0031	C21H18O11	Apigenin-7-O-glucuronide	Flavonoids	Flavones	29741-09-1	3	49709.1	54160.6	49369.7	62280.2	66108.5	92789.4	1.00074	0.138912	1.44335	0.529422	insig
Hmcp002187	C23H24O13	Limocitrin-3-O-galactoside	Flavonoids	Flavonols	-	3	366393	279912	149823	512057	1.03634e+06	514558	0.99929	0.124144	2.59124	1.37364	insig
Lmtp004044	C26H28O16	Quercetin-3-O-apiosyl(1→2)galactoside	Flavonoids	Flavonols	-	3	220659	1374945	183755	772090	423912	233863	0.0892299	0.802549	0.803584	-0.315479	insig
MWSHY0080	C27H30O15	Luteolin-7-O-neohesperidoside (Lonicerin)	Flavonoids	Flavones	25694-72-8	1	9	9	9	7.41232e+06	9.29725e+06	3275585	1.23732	0.0644504	740191	19.4975	up
pmp000003	C16H12O7	Nepetin (5,7,3',4'-Tetrahydroxy-6-methoxyflavone)	Flavonoids	Flavones	520-11-6	2	2.93428e+06	2.77891e+06	3.55934e+06	208786	833118	359373	1.14897	0.00124764	0.151121	-2.72622	down
Wbtp006564	C16H12O7	(2s)-4,8,10-trihydroxy-2-methoxy-1h,2h-furo[3,2-a]xanthen-11-one	Flavonoids	Other Flavonoids	-	3	2.93428e+06	2.77891e+06	3.55934e+06	208786	833118	359373	1.14897	0.00124764	0.151121	-2.72622	down
Lmmp003306	C25H26O15	Quercetin-3-O-xylosyl(1→2)arabinoside	Flavonoids	Flavonols	-	3	48463.4	31675	56685	82588.8	52389	60020	0.789546	0.17514	1.42518	0.511143	insig
MWSHY0162	C27H30O17	Quercetin-3-O-sophoroside (Baimaside)	Flavonoids	Flavonols	18609-17-1	3	819020	2.26515e+06	2.15122e+06	1.56915e+06	1.30793e+06	719093	0.46888	0.37498	0.686896	-0.541836	insig
HJAP061	C32H38O20	Quercetin-3-O-(2''-O-arabinosyl)rutinoside	Flavonoids	Flavonols	-	3	226285	145599	268621	98171.9	223168	226850	0.344661	0.610087	0.855871	-0.224534	insig
pmp000242	C28H30O17	7-Methoxyluteolin-6-C-2''-glucuronylglucoside	Flavonoids	Flavones	-	3	16675	19207.8	18340	31395.4	23195.5	7183.1	0.0506561	0.75776	1.13926	0.188098	insig
Hmqp002870	C32H38O20	Luteolin-7-O-Sophoroside-5-O-arabinoside	Flavonoids	Flavones	-	2	295819	482530	718879	495096	408161	329598	0.307804	0.557241	0.823425	-0.280291	insig
Lmjp002461	C27H30O16	Quercetin-3-O-neohesperidoside*	Flavonoids	Flavonols	29662-79-1	1	1.5895e+07	9692540	11184630	22922385	1.35289e+07	14824245	0.741389	0.249364	1.39441	0.479658	insig
Lmsp004166	C27H30O16	Quercetin-3-O-glucoside-7-O-rhamnoside*	Flavonoids	Flavonols	-	1	1.5895e+07	9692540	11184630	22922385	1.35289e+07	14824245	0.741389	0.249364	1.39441	0.479658	insig
Hmlp003185	C30H32O18	Luteolin-7-O-(6''-malonyl)glucoside-5-O-rhamnoside	Flavonoids	Flavones	-	3	30010	11670	35010	40010	45247.6	40010	0.806433	0.143213	1.63343	0.707903	insig
Lmsp002982	C33H40O21	Quercetin-3-O-sophoroside-7-O-rhamnoside*	Flavonoids	Flavonols	-	1	72429.7	78316	52092	59733.1	31543.1	31082.7	0.910026	0.0979205	0.603235	-0.729208	insig
Lmtp003948	C22H24O12	3',5',5,7-Tetrahydroxy-4'-methoxyflavanone-3'-O-glucoside	Flavonoids	Flavones	-	2	5.21488e+06	21874740	4.82183e+06	4811625	2.60863e+06	5506130	0.667759	0.377082	0.40507	-1.30376	insig
Lmpp003465	C21H20O13	Myricetin-3-O-β-D-glucoside*	Flavonoids	Flavonols	19833-12-6	2	3.63555e+06	6.39059e+06	6.16354e+06	7578175	1.8989e+06	1474265	0.629243	0.481786	0.67644	-0.563966	insig
Wbtp004961	C15H10O7	1,2,4,5-tetrahydroxy-7-(hydroxymethyl)anthracene-9,10-dione	Flavonoids	Other Flavonoids	-	2	1.39283e+06	812315	785500	703154	871401	684262	0.652101	0.343557	0.755294	-0.404889	insig
Hmcp001919	C30H34O18	Isorhamnetin-3-O-(6''-acetylglucosyl)(1→3)-glucoside	Flavonoids	Flavonols	-	3	463201	180941	431803	573088	642699	646668	0.889726	0.0903646	1.73099	0.791601	insig
Hmmp002169	C39H50O24	Luteolin-5,7-di-O-rutinoside	Flavonoids	Flavones	-	3	296980	122580	63720.8	204725	237173	127447	0.400262	0.736376	1.17809	0.236444	insig
mws0032	C15H10O8	Myricetin	Flavonoids	Flavonols	529-44-2	2	2.13908e+06	882730	1654560	678285	581710	576000	1.0545	0.121304	0.392612	-1.34883	down
Zmdp004370	C23H22O10	6''-O-Acetyldaidzin	Flavonoids	Isoflavones	71385-83-6	3	35010	30806.3	25005	16675	10329.1	28340	0.843756	0.140992	0.609374	-0.714601	insig
pmp000194	C24H22O13	6''-O-Malonylgenistin	Flavonoids	Isoflavones	51011-05-3	3	43987.4	58727.2	26545	53601.7	26675	31621	0.26865	0.66652	0.865682	-0.208091	insig
HJAP012	C20H18O10	Luteolin-8-C-arabinoside	Flavonoids	Flavones	-	3	85929.3	75025	78659.4	165492	213500	192905	1.21642	0.012061	2.38674	1.25504	up
pmp001288	C28H32O14	Acacetin-7-O-rutinoside (Linarin)	Flavonoids	Flavones	480-36-4	3	75464.5	81186.5	56811	244899	62400	468941	0.790636	0.251315	3.63643	1.86252	insig
Zmjp005293	C28H32O14	Robinson-7-O-Neohesperidin	Flavonoids	Flavonols	-	3	75464.5	81186.5	56811	244899	62400	468941	0.790636	0.251315	3.63643	1.86252	insig
Hmjp003123	C21H18O13	Quercetin-5-O-glucuronide	Flavonoids	Flavonols	-	3	112297	166399	230614	124981	115252	132061	0.673085	0.312681	0.730976	-0.452105	insig
Hmcp001618	C32H38O20	Quercetin-3-O-(2''-O-Xylosyl)rutinoside	Flavonoids	Flavonols	129235-39-8	2	82608.4	135901	38223.6	36512.3	41566.1	27302.9	0.874896	0.213884	0.41047	-1.28465	insig
pmb3041	C23H22O14	Tricin-7-O-saccharic acid	Flavonoids	Flavones	-	3	1.02154e+06	860289	467397	1.31185e+06	556988	1.24924e+06	0.422715	0.436613	1.32728	0.408471	insig
pmb0571	C26H28O14	Apigenin-7-O-(2''-glucosyl)arabinoside*	Flavonoids	Flavones	-	3	52162.8	62767	51537.8	26675	26675	27028.6	1.21989	0.0156619	0.482849	-1.05036	down
pmb0606	C22H20O12	Chrysoeriol-7-O-glucuronide	Flavonoids	Flavones	-	3	54721.9	37967.9	65507.5	38096.2	26233.8	66475.7	0.443186	0.56454	0.826852	-0.274299	insig
Hmpp002612	C27H30O16	Luteolin-7-O-gentiobioside*	Flavonoids	Flavones	-	2	315355	3347225	251971	992046	986184	875338	0.282724	0.762251	0.728964	-0.45608	insig
