# Supplementary material for: Integration of Metabolomic and Transcriptomic Analyses Reveals the Molecular Mechanisms of Flower Color Formation in Prunus mume
Source: Plants (Basel). 2024 Apr 11;13(8):1077. doi: 10.3390/plants13081077 (PMC11054544; doi:10.3390/plants13081077)
Supplement: Supplementary file 1 [file plants-13-01077-s001.zip › Supplementary Table S2.xlsx]

## Sheet: Sheet1
Table S2：Overview of sequencing data quality preprocessing results.
Sample	Raw Reads	Clean Reads	Clean Base(G)	Q20 (%)	Q30 (%)	GC Content (%)
YD1	51974914	49438852	7.42	97.46	93.17	45.89
YD2	57657764	56010394	8.4	97.31	92.89	45.79
YD3	57864500	55867664	8.38	97.47	93.24	45.65
WYY1	60255638	58135930	8.72	97.35	92.91	46.68
WYY2	50672914	48382538	7.26	97.54	93.36	46.42
WYY3	51208060	49039278	7.36	97.44	93.12	47.17
