# Supplementary material for: Integration of Metabolomic and Transcriptomic Analyses Reveals the Molecular Mechanisms of Flower Color Formation in Prunus mume
Source: Plants (Basel). 2024 Apr 11;13(8):1077. doi: 10.3390/plants13081077 (PMC11054544; doi:10.3390/plants13081077)
Supplement: Supplementary file 1 [file plants-13-01077-s001.zip › Supplementary Table S3.xlsx]

## Sheet: Sheet1
Table S3：Statistical results of comparison rate between reads and reference genome.
Sample	Total Reads	Reads mapped	Unique mapped	Multi mapped	Read1 mapped	Read2 mapped	'+' mapped	'-' mapped
YD1	49438852	45122724(91.27%)	43375146(87.73%)	1747578(3.53%)	21948022(44.39%)	21427124(43.34%)	21653402(43.80%)	21721744(43.94%)
YD2	56010394	51022519(91.09%)	49051416(87.58%)	1971103(3.52%)	24875500(44.41%)	24175916(43.16%)	24492559(43.73%)	24558857(43.85%)
YD3	55867664	50715936(90.78%)	48727772(87.22%)	1988164(3.56%)	24658524(44.14%)	24069248(43.08%)	24324069(43.54%)	24403703(43.68%)
WYY1	58135930	52333451(90.02%)	50342426(86.59%)	1991025(3.42%)	25510417(43.88%)	24832009(42.71%)	25131302(43.23%)	25211124(43.37%)
WYY2	48382538	43730623(90.39%)	42076696(86.97%)	1653927(3.42%)	21289479(44.00%)	20787217(42.96%)	21011350(43.43%)	21065346(43.54%)
WYY3	49039278	43569149(88.85%)	41969682(85.58%)	1599467(3.26%)	21231580(43.30%)	20738102(42.29%)	20960432(42.74%)	21009250(42.84%)
