# Supplementary material for: Integration of Metabolomic and Transcriptomic Analyses Reveals the Molecular Mechanisms of Flower Color Formation in Prunus mume
Source: Plants (Basel). 2024 Apr 11;13(8):1077. doi: 10.3390/plants13081077 (PMC11054544; doi:10.3390/plants13081077)
Supplement: Supplementary file 1 [file plants-13-01077-s001.zip › Supplementary Table S4.xlsx]

## Sheet: Sheet1
Table S4: The expression of all differentially expressed genes.
ID	YD1_fpkm	YD2_fpkm	YD3_fpkm	WYY1_fpkm	WYY2_fpkm	WYY3_fpkm	YD1_count	YD2_count	YD3_count	WYY1_count	WYY2_count	WYY3_count	log2FoldChange	pvalue	padj	regulated	chr	start	end	strand	gene_name	gene_description	KEGG	KEGG pathway	NR	Swissprot	Tremble	KOG	GO	Pfam	TF-Family	TF-Category	TF-Classification
PmuVar_Chr1_1474	6.6175	6.2674	6.1867	205.332	161.943	228.385	104	112	109	3778	2489	3538	5.27162	0	0	up	Chr1	13624880	13626438	-	PmuVar_Chr1_1474	--	K20628 expansin | (RefSeq) expansin-A1-like (A)	--	expansin-A6 [Prunus persica]	EXPA3_ARATH RecName: Full=Expansin-A3; Short=AtEXPA3; AltName: Full=Alpha-expansin-3; Short=At-EXP3; Short=AtEx3; AltName: Full=Ath-ExpAlpha-1.9; Flags: Precursor;	M5VZP0_PRUPE RecName: Full=Expansin {ECO:0000256|RuleBase:RU365023};	--	GO:0005576,extracellular region; GO:0016020,membrane; GO:0009664,plant-type cell wall organization; GO:0009739,response to gibberellin; GO:0010114,response to red light; GO:0006949,syncytium formation; GO:0008150,biological_process; GO:0009987,cellular process; GO:0016043,cellular component organization; GO:0045229,external encapsulating structure organization; GO:0071554,cell wall organization o…	PF01357.24:Expansin C-terminal domain	--	--	--
PmuVar_Chr1_1625	8.7439	7.5754	7.9446	122.024	115.069	130.817	269	265	274	4395	3462	3967	4.22786	0	0	up	Chr1	14518055	14520216	-	PmuVar_Chr1_1625	--	K13508 glycerol-3-phosphate acyltransferase [EC:2.3.1.15 2.3.1.198] | (RefSeq) glycerol-3-phosphate 2-O-acyltransferase 6 (A)	ko00561: Glycerolipid metabolism; ko00564: Glycerophospholipid metabolism; ko01100: Metabolic pathways; ko01110: Biosynthesis of secondary metabolites	hypothetical protein GBA52_019179 [Prunus armeniaca]	GPAT6_ARATH RecName: Full=Glycerol-3-phosphate 2-O-acyltransferase 6; Short=AtGPAT6; EC=2.3.1.198; AltName: Full=Glycerol-3-phosphate acyltransferase 6;	A0A6J5XRY5_PRUAR RecName: Full=PlsC domain-containing protein {ECO:0000259|SMART:SM00563};	--	GO:0016021,integral component of membrane; GO:0016020,membrane; GO:0090447,glycerol-3-phosphate 2-O-acyltransferase activity; GO:0016791,phosphatase activity; GO:0102419,sn-2-glycerol-3-phosphate omega-OH-C22:0-CoA acyl transferase activity; GO:0010143,cutin biosynthetic process; GO:0009908,flower development; GO:0008654,phospholipid biosynthetic process; GO:0003674,molecular_function; GO:0003824…	PF12710.10:haloacid dehalogenase-like hydrolase	--	--	--
PmuVar_Chr1_1673	3.9419	4.1211	3.4315	39.6467	41.9749	37.8384	249	296	243	2932	2593	2356	3.67876	0	0	up	Chr1	14912179	14928326	-	PmuVar_Chr1_1673	--	K07300 Ca2+:H+ antiporter | (RefSeq) vacuolar cation/proton exchanger 3-like (A)	--	cation exchanger 1 [Prunus dulcis]	CAX3_ARATH RecName: Full=Vacuolar cation/proton exchanger 3; AltName: Full=Ca(2+)/H(+) antiporter CAX3; AltName: Full=Ca(2+)/H(+) exchanger 3; AltName: Full=Protein CATION EXCHANGER 3;	A0A4Y1RR03_PRUDU RecName: Full=Vacuolar cation/proton exchanger {ECO:0000256|RuleBase:RU365028};	Ca2+/H+ antiporter VCX1 and related proteins	GO:0061993,calcium:proton antiporter complex; GO:0009705,plant-type vacuole membrane; GO:0005774,vacuolar membrane; GO:0005773,vacuole; GO:0015369,calcium:proton antiporter activity; GO:0070588,calcium ion transmembrane transport; GO:0006812,cation transport; GO:0006874,cellular calcium ion homeostasis; GO:0030026,cellular manganese ion homeostasis; GO:0006882,cellular zinc ion homeostasis; GO:00…	PF01699.27:Sodium/calcium exchanger protein	--	--	--
PmuVar_Chr1_2536	37.1063	35.4891	33.8696	282.651	323.004	302.763	1074	1168	1099	9578	9143	8638	3.39417	0	0	up	Chr1	19884143	19887883	-	PmuVar_Chr1_2536	--	K16296 serine carboxypeptidase-like clade I [EC:3.4.16.-] | (RefSeq) serine carboxypeptidase-like 20 (A)	--	PREDICTED: serine carboxypeptidase-like 20 [Prunus mume]	SCP20_ARATH RecName: Full=Serine carboxypeptidase-like 20; EC=3.4.16.-; Flags: Precursor;	A0A6J5XXW3_PRUAR RecName: Full=Carboxypeptidase {ECO:0000256|RuleBase:RU361156}; EC=3.4.16.- {ECO:0000256|RuleBase:RU361156};	Serine carboxypeptidases (lysosomal cathepsin A)	GO:0005576,extracellular region; GO:0005777,peroxisome; GO:0000325,plant-type vacuole; GO:0016747,transferase activity, transferring acyl groups other than amino-acyl groups; GO:0004185,serine-type carboxypeptidase activity; GO:0006508,proteolysis; GO:0019748,secondary metabolic process; GO:0003674,molecular_function; GO:0003824,catalytic activity; GO:0016740,transferase activity; GO:0016746,tran…	PF00450.25:Serine carboxypeptidase	--	--	--
PmuVar_Chr1_2805	126.897	138.706	125.947	2143.89	1819.59	2244.49	2849	3541	3170	56352	39952	49672	4.29063	0	0	up	Chr1	21879285	21880394	+	PmuVar_Chr1_2805	--	--	--	hypothetical protein GBA52_021728 [Prunus armeniaca]	DR100_ARATH RecName: Full=DNA damage-repair/toleration protein DRT100; Flags: Precursor;	A0A6J5XJF3_PRUAR RecName: Full=LRRNT_2 domain-containing protein {ECO:0000259|Pfam:PF08263};	FOG: Leucine rich repeat	GO:0009507,chloroplast; GO:0000166,nucleotide binding; GO:0006281,DNA repair; GO:0003674,molecular_function; GO:0005488,binding; GO:0036094,small molecule binding; GO:0097159,organic cyclic compound binding; GO:1901265,nucleoside phosphate binding; GO:1901363,heterocyclic compound binding; GO:0006139,nucleobase-containing compound metabolic process; GO:0006259,DNA metabolic process; GO:0006725,ce…	PF13855.9:Leucine rich repeat	--	--	--
PmuVar_Chr1_2913	196.718	198.261	212.478	11.7552	15.8733	12.3958	9048	10369	10956	633	714	562	-3.62623	0	0	down	Chr1	22597556	22601322	+	PmuVar_Chr1_2913	--	K06617 raffinose synthase [EC:2.4.1.82] | (RefSeq) probable galactinol--sucrose galactosyltransferase 1 (A)	ko00052: Galactose metabolism; ko01100: Metabolic pathways	PREDICTED: probable galactinol--sucrose galactosyltransferase 1 [Prunus mume]	RFS1_ARATH RecName: Full=Probable galactinol--sucrose galactosyltransferase 1; EC=2.4.1.82; AltName: Full=Protein SEED IMBIBITION 1; AltName: Full=Raffinose synthase 1;	A0A6J5V240_PRUAR RecName: Full=Galactinol--sucrose galactosyltransferase {ECO:0000256|ARBA:ARBA00012708}; EC=2.4.1.82 {ECO:0000256|ARBA:ARBA00012708};	--	GO:0047274,galactinol-sucrose galactosyltransferase activity; GO:0005975,carbohydrate metabolic process; GO:0003674,molecular_function; GO:0003824,catalytic activity; GO:0008378,galactosyltransferase activity; GO:0016740,transferase activity; GO:0016757,transferase activity, transferring glycosyl groups; GO:0016758,transferase activity, transferring hexosyl groups; GO:0008150,biological_process; …	PF05691.15:Raffinose synthase or seed imbibition protein Sip1	--	--	--
PmuVar_Chr1_3008	5.4934	6.1384	7.0332	736.835	613.195	741.009	85	108	122	13348	9279	11302	7.10857	0	0	up	Chr1	23402688	23404040	+	PmuVar_Chr1_3008	--	K20628 expansin | (RefSeq) expansin-A8 precursor (A)	--	expansin [Prunus armeniaca]	EXPA8_ARATH RecName: Full=Expansin-A8; Short=AtEXPA8; AltName: Full=Alpha-expansin-8; Short=At-EXP8; Short=AtEx8; AltName: Full=Ath-ExpAlpha-1.11; Flags: Precursor;	O82093_PRUAR RecName: Full=Expansin {ECO:0000256|RuleBase:RU365023};	--	GO:0005576,extracellular region; GO:0016020,membrane; GO:0009664,plant-type cell wall organization; GO:0009635,response to herbicide; GO:0006949,syncytium formation; GO:0008150,biological_process; GO:0009987,cellular process; GO:0016043,cellular component organization; GO:0045229,external encapsulating structure organization; GO:0071554,cell wall organization or biogenesis; GO:0071555,cell wall o…	PF01357.24:Expansin C-terminal domain	--	--	--
PmuVar_Chr1_4011	69.9701	73.7093	67.9581	2074.15	2187.8	2035.98	743	890	809	25786	22720	21311	5.19616	0	0	up	Chr1	31213881	31214537	+	PmuVar_Chr1_4011	--	--	--	PREDICTED: uncharacterized protein LOC103328506 [Prunus mume]	--	A0A6J5XL70_PRUAR SubName: Full=Uncharacterized protein {ECO:0000313|EMBL:CAB4313791.1};	--	--	PF01190.20:Pollen protein Ole e 1 like	--	--	--
PmuVar_Chr2_0617	183.733	179.101	179.534	7.1546	6.3019	4.6288	5396	5981	5911	246	181	134	-4.59703	0	0	down	Chr2	5483080	5484969	-	PmuVar_Chr2_0617	--	K22706 (R)-mandelonitrile beta-glucosyltransferase [EC:2.4.1.354] | (RefSeq) 7-deoxyloganetin glucosyltransferase-like (A)	ko00460: Cyanoamino acid metabolism; ko01100: Metabolic pathways; ko01110: Biosynthesis of secondary metabolites	PREDICTED: 7-deoxyloganetin glucosyltransferase-like [Prunus mume]	85A19_PRUDU RecName: Full=(R)-mandelonitrile beta-glucosyltransferase {ECO:0000305}; EC=2.4.1.354 {ECO:0000269|PubMed:32688778}; AltName: Full=UDP-glycosyltransferase 85A19 {ECO:0000303|PubMed:32688778};	M5XR78_PRUPE RecName: Full=Glycosyltransferase {ECO:0000256|RuleBase:RU362057}; EC=2.4.1.- {ECO:0000256|RuleBase:RU362057};	UDP-glucuronosyl and UDP-glucosyl transferase	GO:0008194,UDP-glycosyltransferase activity; GO:0003674,molecular_function; GO:0003824,catalytic activity; GO:0016740,transferase activity; GO:0016757,transferase activity, transferring glycosyl groups	PF00201.21:UDP-glucoronosyl and UDP-glucosyl transferase	--	--	--
PmuVar_Chr2_0623	1.6344	3.0544	2.3691	90.1593	82.3424	80.9694	48	102	78	3100	2365	2344	5.45681	0	0	up	Chr2	5547488	5549027	+	PmuVar_Chr2_0623	--	K22706 (R)-mandelonitrile beta-glucosyltransferase [EC:2.4.1.354] | (RefSeq) 7-deoxyloganetin glucosyltransferase-like (A)	ko00460: Cyanoamino acid metabolism; ko01100: Metabolic pathways; ko01110: Biosynthesis of secondary metabolites	mandelonitrile glucosyltransferase UGT85A19 [Prunus armeniaca]	85A19_PRUDU RecName: Full=(R)-mandelonitrile beta-glucosyltransferase {ECO:0000305}; EC=2.4.1.354 {ECO:0000269|PubMed:32688778}; AltName: Full=UDP-glycosyltransferase 85A19 {ECO:0000303|PubMed:32688778};	A0A2Z6GFU0_PRUMU RecName: Full=Glycosyltransferase {ECO:0000256|RuleBase:RU362057}; EC=2.4.1.- {ECO:0000256|RuleBase:RU362057};	UDP-glucuronosyl and UDP-glucosyl transferase	GO:0008194,UDP-glycosyltransferase activity; GO:0003674,molecular_function; GO:0003824,catalytic activity; GO:0016740,transferase activity; GO:0016757,transferase activity, transferring glycosyl groups	PF00201.21:UDP-glucoronosyl and UDP-glucosyl transferase	--	--	--
PmuVar_Chr2_1082	105.151	100.627	98.0297	1756.61	1555.19	1847.49	2348	2555	2454	45923	33962	40665	4.38966	0	0	up	Chr2	8829489	8832718	-	PmuVar_Chr2_1082	--	--	--	PREDICTED: uncharacterized protein LOC103320060 [Prunus mume]	--	A0A6J5TSN2_PRUAR SubName: Full=Uncharacterized protein {ECO:0000313|EMBL:CAB4266712.1};	--	--	PF04862.15:Protein of unknown function (DUF642)	--	--	--
PmuVar_Chr2_1703	13.4977	16.8459	14.0422	171.019	157.762	187.807	439	623	512	6512	5018	6021	3.84273	0	0	up	Chr2	12769543	12771854	-	PmuVar_Chr2_1703	--	K15397 3-ketoacyl-CoA synthase [EC:2.3.1.199] | (RefSeq) 3-ketoacyl-CoA synthase 10 (A)	ko00062: Fatty acid elongation; ko01100: Metabolic pathways; ko01110: Biosynthesis of secondary metabolites; ko04626: Plant-pathogen interaction	PREDICTED: 3-ketoacyl-CoA synthase 10 [Prunus mume]	KCS10_ARATH RecName: Full=3-ketoacyl-CoA synthase 10 {ECO:0000303|PubMed:18465198}; Short=KCS-10 {ECO:0000303|PubMed:18465198}; EC=2.3.1.199 {ECO:0000305}; AltName: Full=Protein FIDDLEHEAD {ECO:0000303|PubMed:10559443}; AltName: Full=Very long-chain fatty acid condensing enzyme 10 {ECO:0000303|PubMed:18465198}; Short=VLCFA condensing enzyme 10 {ECO:0000303|PubMed:18465198};	A0A6J5W9T2_PRUAR RecName: Full=3-ketoacyl-CoA synthase {ECO:0000256|PIRNR:PIRNR036417}; EC=2.3.1.- {ECO:0000256|PIRNR:PIRNR036417};	--	GO:0005783,endoplasmic reticulum; GO:0005789,endoplasmic reticulum membrane; GO:0016021,integral component of membrane; GO:0005777,peroxisome; GO:0102756,very-long-chain 3-ketoacyl-CoA synthase activity; GO:0006633,fatty acid biosynthetic process; GO:0009409,response to cold; GO:0009416,response to light stimulus; GO:0003674,molecular_function; GO:0003824,catalytic activity; GO:0016740,transferas…	PF08392.15:FAE1/Type III polyketide synthase-like protein	--	--	--
PmuVar_Chr2_2101	10.7755	12.1522	9.6495	184.655	204.335	195.483	255	327	256	5116	4729	4560	4.4654	0	0	up	Chr2	15016964	15018834	+	PmuVar_Chr2_2101	--	--	--	PREDICTED: GDSL esterase/lipase EXL3-like [Prunus mume]	EXL3_ARATH RecName: Full=GDSL esterase/lipase EXL3; EC=3.1.1.-; AltName: Full=Family II extracellular lipase 3; Short=Family II lipase EXL3; Flags: Precursor;	A0A6J5TR59_PRUAR SubName: Full=Uncharacterized protein {ECO:0000313|EMBL:CAB4265535.1};	--	GO:0005783,endoplasmic reticulum; GO:0005576,extracellular region; GO:0016298,lipase activity; GO:0016042,lipid catabolic process; GO:0003674,molecular_function; GO:0003824,catalytic activity; GO:0016787,hydrolase activity; GO:0016788,hydrolase activity, acting on ester bonds; GO:0006629,lipid metabolic process; GO:0008150,biological_process; GO:0008152,metabolic process; GO:0009056,catabolic pro…	PF00657.25:GDSL-like Lipase/Acylhydrolase	--	--	--
PmuVar_Chr2_2885	42.1493	47.0377	42.4977	343.935	313.437	362.497	844	1071	954	8063	6138	7155	3.256	0	0	up	Chr2	20095073	20099434	+	PmuVar_Chr2_2885	--	K20628 expansin | (RefSeq) expansin-A1-like (A)	--	PREDICTED: expansin-A1 [Prunus mume]	EXPA1_ARATH RecName: Full=Expansin-A1; Short=AtEXPA1; AltName: Full=Alpha-expansin-1; Short=At-EXP1; Short=AtEx1; AltName: Full=Ath-ExpAlpha-1.2; Flags: Precursor;	A0A6J5TKZ3_PRUAR RecName: Full=Expansin {ECO:0000256|RuleBase:RU365023};	--	GO:0005576,extracellular region; GO:0016020,membrane; GO:0009653,anatomical structure morphogenesis; GO:0009664,plant-type cell wall organization; GO:0008150,biological_process; GO:0032502,developmental process; GO:0048856,anatomical structure development; GO:0009987,cellular process; GO:0016043,cellular component organization; GO:0045229,external encapsulating structure organization; GO:0071554,…	PF01357.24:Expansin C-terminal domain	--	--	--
PmuVar_Chr2_3078	14.4469	14.7757	10.023	720.368	727.567	616.321	135	157	105	7881	6649	5677	6.02003	0	0	up	Chr2	21495590	21496151	+	PmuVar_Chr2_3078	--	--	--	PREDICTED: MLP-like protein 423 [Prunus mume]	ML423_ARATH RecName: Full=MLP-like protein 423;	A0A314ZPQ0_PRUYE RecName: Full=Bet_v_1 domain-containing protein {ECO:0000259|SMART:SM01037};	--	GO:0005829,cytosol; GO:0005634,nucleus; GO:0010427,abscisic acid binding; GO:0004864,protein phosphatase inhibitor activity; GO:0038023,signaling receptor activity; GO:0009738,abscisic acid-activated signaling pathway; GO:0006952,defense response; GO:0003674,molecular_function; GO:0005488,binding; GO:0008289,lipid binding; GO:0019840,isoprenoid binding; GO:0031406,carboxylic acid binding; GO:0033…	PF00407.22:Pathogenesis-related protein Bet v 1 family	--	--	--
PmuVar_Chr2_3608	3214.97	3223.78	3044.39	12946.2	13613.9	14381.3	57549	65617	61093	271313	238324	253754	2.41206	0	0	up	Chr2	25268868	25270500	+	PmuVar_Chr2_3608	--	K08235 xyloglucan:xyloglucosyl transferase [EC:2.4.1.207] | (RefSeq) probable xyloglucan endotransglucosylase/hydrolase protein B (A)	--	PREDICTED: probable xyloglucan endotransglucosylase/hydrolase protein B [Prunus mume]	XTH34_POPPZ RecName: Full=Xyloglucan endotransglucosylase protein 34 {ECO:0000305}; Short=XET protein 34 {ECO:0000305}; EC=2.4.1.207 {ECO:0000255|RuleBase:RU361120, ECO:0000269|PubMed:12595718, ECO:0000269|PubMed:15020748, ECO:0000269|PubMed:15125664, ECO:0000269|PubMed:15804235, ECO:0000269|PubMed:16014999}; AltName: Full=PttXET16-34 {ECO:0000303|PubMed:17504814}; AltName: Full=PttXET16A {ECO:00…	A0A6J5W247_PRUAR RecName: Full=Xyloglucan endotransglucosylase/hydrolase {ECO:0000256|RuleBase:RU361120}; EC=2.4.1.207 {ECO:0000256|RuleBase:RU361120};	--	GO:0048046,apoplast; GO:0005737,cytoplasm; GO:0004553,hydrolase activity, hydrolyzing O-glycosyl compounds; GO:0030247,polysaccharide binding; GO:0016762,xyloglucan:xyloglucosyl transferase activity; GO:0042546,cell wall biogenesis; GO:0071555,cell wall organization; GO:0010411,xyloglucan metabolic process; GO:0003674,molecular_function; GO:0003824,catalytic activity; GO:0016787,hydrolase activit…	PF00722.24:Glycosyl hydrolases family 16	--	--	--
PmuVar_Chr2_4479	57.4724	55.3575	53.7601	367.716	359.021	362.928	1932	2116	2026	14472	11803	12026	3.01188	0	0	up	Chr2	32673777	32694214	-	PmuVar_Chr2_4479	--	K08248 (R)-mandelonitrile lyase [EC:4.1.2.10] | (RefSeq) (R)-mandelonitrile lyase 1-like (A)	ko00460: Cyanoamino acid metabolism; ko01100: Metabolic pathways; ko01110: Biosynthesis of secondary metabolites	PREDICTED: (R)-mandelonitrile lyase 1-like [Prunus mume]	MDL2_PRUDU RecName: Full=(R)-mandelonitrile lyase 2; EC=4.1.2.10; AltName: Full=Hydroxynitrile lyase 2; Short=(R)-oxynitrilase 2; Short=PaHNL1; AltName: Full=R-oxynitrile lyase isoenzyme 2; Flags: Precursor;	A0A251QUP1_PRUPE RecName: Full=(R)-mandelonitrile lyase {ECO:0000256|ARBA:ARBA00013074}; EC=4.1.2.10 {ECO:0000256|ARBA:ARBA00013074};	Glucose dehydrogenase/choline dehydrogenase/mandelonitrile lyase (GMC oxidoreductase family)	GO:0050660,flavin adenine dinucleotide binding; GO:0046593,mandelonitrile lyase activity; GO:0016614,oxidoreductase activity, acting on CH-OH group of donors; GO:0050898,nitrile metabolic process; GO:0000166,nucleotide binding; GO:0003674,molecular_function; GO:0005488,binding; GO:0036094,small molecule binding; GO:0043167,ion binding; GO:0043168,anion binding; GO:0097159,organic cyclic compound …	PF00732.22:GMC oxidoreductase	--	--	--
PmuVar_Chr2_4826	36.4406	34.208	30.6792	871.78	849.691	823.693	356	380	336	9971	8118	7932	4.95433	0	0	up	Chr2	35379261	35379852	-	PmuVar_Chr2_4826	--	--	--	major allergen Pru ar 1-like [Prunus avium]	FRA18_FRAAN RecName: Full=Major strawberry allergen Fra a 1.08 {ECO:0000305}; AltName: Full=Class 10 plant pathogenesis-related protein Fra a 1.08 {ECO:0000305}; Short=PR10-related protein Fra a 1.08 {ECO:0000305}; EC=3.1.27.- {ECO:0000269|PubMed:30572279}; AltName: Allergen=Fra a 1 {ECO:0000305};	Q6QHU2_PRUAV SubName: Full=Major cherry allergen Pru av 1.0202 {ECO:0000313|EMBL:AAS47036.1}; SubName: Full=major allergen Pru ar 1-like {ECO:0000313|RefSeq:XP_021806217.1, ECO:0000313|RefSeq:XP_021806225.1};	--	GO:0010427,abscisic acid binding; GO:0004518,nuclease activity; GO:0004864,protein phosphatase inhibitor activity; GO:0038023,signaling receptor activity; GO:0009738,abscisic acid-activated signaling pathway; GO:0006952,defense response; GO:0009607,response to biotic stimulus; GO:0003674,molecular_function; GO:0005488,binding; GO:0008289,lipid binding; GO:0019840,isoprenoid binding; GO:0031406,ca…	PF00407.22:Pathogenesis-related protein Bet v 1 family	--	--	--
PmuVar_Chr2_5283	119.247	115.764	112.435	481.505	483.229	490.269	3437	3794	3633	16248	13621	13929	2.36825	0	0	up	Chr2	39696021	39697445	-	PmuVar_Chr2_5283	--	K13691 pathogen-inducible salicylic acid glucosyltransferase [EC:2.4.1.-] | (RefSeq) UDP-glycosyltransferase 74E2-like (A)	--	PREDICTED: crocetin glucosyltransferase, chloroplastic-like [Prunus mume]	75L17_MALDO RecName: Full=Phloretin 4'-O-glucosyltransferase {ECO:0000303|PubMed:27316677}; Short=MdPh-4'-OGT {ECO:0000303|PubMed:27316677}; EC=2.4.1.- {ECO:0000269|PubMed:27316677}; AltName: Full=Flavanone 7-O-beta-glucosyltransferase UGT75L17 {ECO:0000305}; EC=2.4.1.185 {ECO:0000269|PubMed:27316677}; AltName: Full=UDP-glycosyltransferase 75L17 {ECO:0000303|PubMed:27316677};	A0A6J5W0K1_PRUAR RecName: Full=Glycosyltransferase {ECO:0000256|RuleBase:RU362057}; EC=2.4.1.- {ECO:0000256|RuleBase:RU362057};	UDP-glucuronosyl and UDP-glucosyl transferase	GO:0047243,flavanone 7-O-beta-glucosyltransferase activity; GO:0008194,UDP-glycosyltransferase activity; GO:0003674,molecular_function; GO:0003824,catalytic activity; GO:0016740,transferase activity; GO:0016757,transferase activity, transferring glycosyl groups; GO:0016758,transferase activity, transferring hexosyl groups; GO:0035251,UDP-glucosyltransferase activity; GO:0046527,glucosyltransferas…	PF00201.21:UDP-glucoronosyl and UDP-glucosyl transferase	--	--	--
PmuVar_Chr3_0752	8.8702	8.4829	8.3447	308.192	334.204	330.051	183	199	193	7444	6743	6712	5.54479	0	0	up	Chr3	4531609	4543466	-	PmuVar_Chr3_0752	--	--	--	unnamed protein product [Prunus armeniaca]	GDL15_ARATH RecName: Full=GDSL esterase/lipase At1g29670; EC=3.1.1.-; AltName: Full=Extracellular lipase At1g29670; Flags: Precursor;	A0A6J5UKQ4_PRUAR SubName: Full=Uncharacterized protein {ECO:0000313|EMBL:CAB4276327.1};	--	GO:0048046,apoplast; GO:0009534,chloroplast thylakoid; GO:0005634,nucleus; GO:0016788,hydrolase activity, acting on ester bonds; GO:0016042,lipid catabolic process; GO:0003674,molecular_function; GO:0003824,catalytic activity; GO:0016787,hydrolase activity; GO:0006629,lipid metabolic process; GO:0008150,biological_process; GO:0008152,metabolic process; GO:0009056,catabolic process; GO:0044238,pri…	PF00657.25:GDSL-like Lipase/Acylhydrolase	--	--	--
PmuVar_Chr3_0895	57.1009	57.8537	56.7336	246.814	254.167	253.551	2512	2894	2798	12712	10935	10995	2.43761	0	0	up	Chr3	5380828	5384547	+	PmuVar_Chr3_0895	--	K21989 calcium permeable stress-gated cation channel | (RefSeq) CSC1-like protein ERD4 (A)	--	PREDICTED: CSC1-like protein ERD4 [Prunus mume]	CSC1L_BRAJU RecName: Full=CSC1-like protein ERD4; AltName: Full=Protein EARLY-RESPONSIVE TO DEHYDRATION STRESS 4;	A0A6J5UKP0_PRUAR SubName: Full=Uncharacterized protein {ECO:0000313|EMBL:CAB4276512.1};	Uncharacterized conserved protein	GO:0031969,chloroplast membrane; GO:0016021,integral component of membrane; GO:0005227,calcium activated cation channel activity; GO:0003674,molecular_function; GO:0005215,transporter activity; GO:0005216,ion channel activity; GO:0005261,cation channel activity; GO:0008324,cation transmembrane transporter activity; GO:0015075,ion transmembrane transporter activity; GO:0015267,channel activity; GO…	PF02714.18:Calcium-dependent channel, 7TM region, putative phosphate	--	--	--
PmuVar_Chr3_1777	4.7785	4.5664	4.1282	71.5072	74.1388	74.3954	127	138	123	2225	1927	1949	4.33347	0	0	up	Chr3	12476685	12477998	+	PmuVar_Chr3_1777	--	--	--	epidermis-specific secreted glycoprotein EP1 [Prunus persica]	EP1G_DAUCA RecName: Full=Epidermis-specific secreted glycoprotein EP1; AltName: Full=52/54 kDa medium protein; Flags: Precursor;	A0A251PLJ6_PRUPE SubName: Full=Uncharacterized protein {ECO:0000313|EMBL:ONI12456.1};	--	GO:0005576,extracellular region; GO:0030246,carbohydrate binding; GO:0006833,water transport; GO:0003674,molecular_function; GO:0005488,binding; GO:0006810,transport; GO:0008150,biological_process; GO:0042044,fluid transport; GO:0051179,localization; GO:0051234,establishment of localization; GO:0005575,cellular_component; GO:0110165,cellular anatomical entity	PF01453.27:D-mannose binding lectin	--	--	--
PmuVar_Chr3_2021	31.9695	30.5262	32.7593	207.959	211.403	223.511	968	1051	1112	7372	6260	6671	3.05741	0	0	up	Chr3	14228839	14232553	-	PmuVar_Chr3_2021	--	K05350 beta-glucosidase [EC:3.2.1.21] | (RefSeq) beta-glucosidase 18-like (A)	ko00460: Cyanoamino acid metabolism; ko00500: Starch and sucrose metabolism; ko00999: Biosynthesis of various plant secondary metabolites; ko01100: Metabolic pathways; ko01110: Biosynthesis of secondary metabolites	unnamed protein product [Prunus armeniaca]	BGL18_ORYSJ RecName: Full=Beta-glucosidase 18 {ECO:0000303|PubMed:17196101}; Short=Os4bglu18 {ECO:0000303|PubMed:17196101}; EC=3.2.1.21 {ECO:0000269|PubMed:23811195, ECO:0000269|PubMed:25219312}; Flags: Precursor;	A0A6J5UUH1_PRUAR SubName: Full=Uncharacterized protein {ECO:0000313|EMBL:CAB4277578.1};	Beta-glucosidase, lactase phlorizinhydrolase, and related proteins	GO:0033907,beta-D-fucosidase activity; GO:0004565,beta-galactosidase activity; GO:0008422,beta-glucosidase activity; GO:0047782,coniferin beta-glucosidase activity; GO:0102483,scopolin beta-glucosidase activity; GO:0005975,carbohydrate metabolic process; GO:0033491,coniferin metabolic process; GO:0016137,glycoside metabolic process; GO:0003674,molecular_function; GO:0003824,catalytic activity; GO…	PF00232.21:Glycosyl hydrolase family 1	--	--	--
PmuVar_Chr4_1305	9.5457	9.976	9.5203	128.687	135.381	132.666	669	795	748	10559	9279	9165	4.07329	0	0	up	Chr4	12071997	12111153	-	PmuVar_Chr4_1305	--	K13430 serine/threonine-protein kinase PBS1 [EC:2.7.11.1] | (RefSeq) serine/threonine-protein kinase PBS1 (A)	ko04626: Plant-pathogen interaction	putative leucine-rich repeat receptor-like serine/threonine-protein kinase At2g19230 isoform X1 [Prunus persica]	Y5188_ARATH RecName: Full=Probable LRR receptor-like serine/threonine-protein kinase At1g51880; EC=2.7.11.1; Flags: Precursor;	A0A251PW31_PRUPE RecName: Full=Protein kinase domain-containing protein {ECO:0000259|PROSITE:PS50011};	--	GO:0016021,integral component of membrane; GO:0005524,ATP binding; GO:0106310,protein serine kinase activity; GO:0004674,protein serine/threonine kinase activity; GO:0006468,protein phosphorylation; GO:0000166,nucleotide binding; GO:0003674,molecular_function; GO:0005488,binding; GO:0017076,purine nucleotide binding; GO:0030554,adenyl nucleotide binding; GO:0032553,ribonucleotide binding; GO:0032…	PF12819.10:Malectin-like domain	--	--	--
PmuVar_Chr4_2374	15.3077	12.7748	14.0613	357.365	330.835	324.136	235	223	242	6423	4967	4905	4.89176	0	0	up	Chr4	19331574	19332788	+	PmuVar_Chr4_2374	--	--	--	PREDICTED: uncharacterized protein LOC103330044 [Prunus mume]	--	A0A6J5UI38_PRUAR SubName: Full=Uncharacterized protein {ECO:0000313|EMBL:CAB4274984.1};	--	--	PF09366.13:Protein of unknown function (DUF1997)	--	--	--
PmuVar_Chr5_0438	328.893	335.16	324.867	3030.87	2816.3	2846.9	4630	5365	5127	49953	38773	39505	3.43843	0	0	up	Chr5	4820873	4821838	-	PmuVar_Chr5_0438	--	--	--	PREDICTED: proline-rich protein 4-like [Prunus mume]	--	A0A5E4FN71_PRUDU SubName: Full=PREDICTED: proline-rich 4 {ECO:0000313|EMBL:VVA28898.1};	--	--	--	--	--	--
PmuVar_Chr5_0441	307.44	282.443	295.82	2914.59	2525.98	2674.04	3787	3956	4085	42032	30429	32468	3.49889	0	0	up	Chr5	4838335	4852105	-	PmuVar_Chr5_0441	--	--	--	PREDICTED: proline-rich protein 4-like [Prunus mume]	--	A0A5E4FN71_PRUDU SubName: Full=PREDICTED: proline-rich 4 {ECO:0000313|EMBL:VVA28898.1};	--	--	--	--	--	--
PmuVar_Chr5_1433	83.3496	88.5009	86.1064	1396.99	1593.04	1563.95	5710	6894	6613	112045	106729	105611	4.44322	0	0	up	Chr5	16197936	16210206	-	PmuVar_Chr5_1433	--	K15404 aldehyde decarbonylase [EC:4.1.99.5] | (RefSeq) protein ECERIFERUM 1-like (A)	ko00073: Cutin, suberine and wax biosynthesis; ko01110: Biosynthesis of secondary metabolites	hypothetical protein RHSIM_Rhsim07G0040100 [Rhododendron simsii]	CER1_ARATH RecName: Full=Very-long-chain aldehyde decarbonylase CER1 {ECO:0000305}; EC=4.1.99.5 {ECO:0000269|PubMed:21386033, ECO:0000269|PubMed:22773744}; AltName: Full=Protein ECERIFERUM 1;	A0A834GUP0_RHOSS SubName: Full=Uncharacterized protein {ECO:0000313|EMBL:KAF7139631.1};	--	GO:0005789,endoplasmic reticulum membrane; GO:0016021,integral component of membrane; GO:0016020,membrane; GO:1990465,aldehyde oxygenase (deformylating) activity; GO:0000254,C-4 methylsterol oxidase activity; GO:0005506,iron ion binding; GO:0009924,octadecanal decarbonylase activity; GO:0016491,oxidoreductase activity; GO:0043447,alkane biosynthetic process; GO:0042742,defense response to bacteri…	PF12076.11:WAX2 C-terminal domain	--	--	--
PmuVar_Chr5_2385	4.9266	5.2529	4.9779	105.313	107.974	100.048	113	137	128	2828	2422	2262	4.67026	0	0	up	Chr5	23342890	23344636	-	PmuVar_Chr5_2385	--	K13066 caffeic acid 3-O-methyltransferase / acetylserotonin O-methyltransferase [EC:2.1.1.68 2.1.1.4] | (RefSeq) OMT1; uncharacterized protein LOC103342359 (A)	ko00380: Tryptophan metabolism; ko00940: Phenylpropanoid biosynthesis; ko01100: Metabolic pathways; ko01110: Biosynthesis of secondary metabolites	caffeic acid 3-O-methyltransferase-like [Prunus mume]	COMT1_PRUDU RecName: Full=Caffeic acid 3-O-methyltransferase; Short=CAOMT; Short=COMT; EC=2.1.1.68; AltName: Full=S-adenosysl-L-methionine:caffeic acid 3-O-methyltransferase;	D3JZ18_PRUMU SubName: Full=O-methyltransferase-like protein {ECO:0000313|EMBL:ADB85561.1};	Hydroxyindole-O-methyltransferase and related SAM-dependent methyltransferases	GO:0047763,caffeate O-methyltransferase activity; GO:0046983,protein dimerization activity; GO:0009809,lignin biosynthetic process; GO:0032259,methylation; GO:0003674,molecular_function; GO:0003824,catalytic activity; GO:0008168,methyltransferase activity; GO:0008171,O-methyltransferase activity; GO:0016740,transferase activity; GO:0016741,transferase activity, transferring one-carbon groups; GO:…	PF00891.21:O-methyltransferase domain	--	--	--
PmuVar_Chr5_2990	6.2289	6.5695	6.3148	65.1798	64.656	71.5393	271	325	308	3320	2751	3068	3.69937	0	0	up	Chr5	27077105	27080419	+	PmuVar_Chr5_2990	--	K03549 KUP system potassium uptake protein | (RefSeq) potassium transporter 2 (A)	--	unnamed protein product [Prunus armeniaca]	POT2_ARATH RecName: Full=Potassium transporter 2; Short=AtKT2; Short=AtKUP2; Short=AtPOT2;	A0A6J5U483_PRUAR RecName: Full=Potassium transporter {ECO:0000256|RuleBase:RU321113};	--	GO:0016021,integral component of membrane; GO:0016020,membrane; GO:0005886,plasma membrane; GO:0015079,potassium ion transmembrane transporter activity; GO:0006813,potassium ion transport; GO:0003674,molecular_function; GO:0005215,transporter activity; GO:0008324,cation transmembrane transporter activity; GO:0015075,ion transmembrane transporter activity; GO:0015318,inorganic molecular entity tra…	PF02705.19:K+ potassium transporter	--	--	--
PmuVar_Chr5_3155	12.508	12.115	11.9111	234.536	224.34	223.519	148	163	158	3249	2596	2607	4.5268	0	0	up	Chr5	28053382	28053966	-	PmuVar_Chr5_3155	--	K01051 pectinesterase [EC:3.1.1.11] | (RefSeq) pectinesterase (A)	ko00040: Pentose and glucuronate interconversions; ko01100: Metabolic pathways	PREDICTED: 21 kDa protein [Prunus mume]	21KD_DAUCA RecName: Full=21 kDa protein; AltName: Full=1.2 protein; Flags: Precursor;	A0A4Y1R2D0_PRUDU SubName: Full=Plant invertase/pectin methylesterase inhibitor superfamily protein {ECO:0000313|EMBL:BBG98244.1};	--	GO:0004857,enzyme inhibitor activity; GO:0003674,molecular_function; GO:0030234,enzyme regulator activity; GO:0098772,molecular function regulator	PF04043.18:Plant invertase/pectin methylesterase inhibitor	--	--	--
PmuVar_Chr6_1731	19.6485	17.9452	18.2016	176.35	161.89	168.533	831	863	863	8732	6696	7026	3.48672	0	0	up	Chr6	12860741	12872534	-	PmuVar_Chr6_1731	--	K09872 aquaporin PIP | (RefSeq) aquaporin PIP2-2 (A)	--	uncharacterized protein LOC117636424 [Prunus dulcis]	PIP27_ARATH RecName: Full=Aquaporin PIP2-7 {ECO:0000303|PubMed:11806824}; AltName: Full=Plasma membrane intrinsic protein 2-7 {ECO:0000303|PubMed:11806824}; Short=AtPIP2;7 {ECO:0000303|PubMed:11806824}; AltName: Full=Plasma membrane intrinsic protein 3 {ECO:0000303|PubMed:9276952}; Short=At-PIP3 {ECO:0000303|PubMed:9276952}; AltName: Full=Salt stress-induced major intrinsic protein {ECO:0000303|P…	A0A6P5S9C4_PRUAV SubName: Full=uncharacterized protein LOC110753759 {ECO:0000313|RefSeq:XP_021810408.1};	Aquaporin (major intrinsic protein family)	GO:0046658,anchored component of plasma membrane; GO:0016021,integral component of membrane; GO:0005886,plasma membrane; GO:0009506,plasmodesma; GO:0005773,vacuole; GO:0003729,mRNA binding; GO:0015250,water channel activity; GO:0003674,molecular_function; GO:0003676,nucleic acid binding; GO:0003723,RNA binding; GO:0005488,binding; GO:0097159,organic cyclic compound binding; GO:1901363,heterocycli…	PF00230.23:Major intrinsic protein	--	--	--
PmuVar_Chr6_1786	147.185	156.429	159.931	1651.48	1386.47	1814.87	1554	1878	1893	20414	14316	18888	3.69274	0	0	up	Chr6	13205575	13206177	+	PmuVar_Chr6_1786	--	--	--	--	--	--	--	--	--	--	--	--
PmuVar_Chr6_2701	113.661	112.647	115.44	1.7352	2.3528	1.7034	5483	6179	6243	98	111	81	-5.58823	0	0	down	Chr6	20463405	20473115	+	PmuVar_Chr6_2701	--	K01868 threonyl-tRNA synthetase [EC:6.1.1.3] | (RefSeq) threonine--tRNA ligase, mitochondrial 1-like (A)	ko00970: Aminoacyl-tRNA biosynthesis	unnamed protein product [Prunus armeniaca]	SYTM1_ARATH RecName: Full=Threonine--tRNA ligase, mitochondrial 1 {ECO:0000305}; EC=6.1.1.3 {ECO:0000305}; AltName: Full=AtSYT1 {ECO:0000303|PubMed:10583378}; AltName: Full=Threonyl-tRNA synthetase {ECO:0000305}; Short=ThrRS {ECO:0000305}; Flags: Precursor;	A0A6J5Y4B1_PRUAR RecName: Full=Threonine--tRNA ligase {ECO:0000256|ARBA:ARBA00013163}; EC=6.1.1.3 {ECO:0000256|ARBA:ARBA00013163}; AltName: Full=Threonyl-tRNA synthetase {ECO:0000256|ARBA:ARBA00031900};	Threonyl-tRNA synthetase	GO:0009507,chloroplast; GO:0005829,cytosol; GO:0005739,mitochondrion; GO:0009505,plant-type cell wall; GO:0009536,plastid; GO:0005524,ATP binding; GO:0046872,metal ion binding; GO:0004829,threonine-tRNA ligase activity; GO:0006435,threonyl-tRNA aminoacylation; GO:0000166,nucleotide binding; GO:0003674,molecular_function; GO:0005488,binding; GO:0017076,purine nucleotide binding; GO:0030554,adenyl …	PF00587.28:tRNA synthetase class II core domain (G, H, P, S and T)	--	--	--
PmuVar_Chr7_0360	1035.25	881.462	900.069	20.6348	22.5963	23.5585	5528	5352	5388	129	118	124	-5.09998	0	0	down	Chr7	3029547	3029810	-	PmuVar_Chr7_0360	--	--	--	hypothetical protein GBA52_016861 [Prunus armeniaca]	--	A0A6J5X988_PRUAR SubName: Full=Uncharacterized protein {ECO:0000313|EMBL:CAB4310506.1};	--	--	--	--	--	--
PmuVar_Chr7_0815	7.7226	8.2969	8.522	412.332	405.453	485.536	194	237	240	12127	9961	12023	6.03304	0	0	up	Chr7	6244105	6245812	-	PmuVar_Chr7_0815	--	K01728 pectate lyase [EC:4.2.2.2] | (RefSeq) probable pectate lyase 18 precursor (A)	ko00040: Pentose and glucuronate interconversions; ko01100: Metabolic pathways	probable pectate lyase 18 precursor [Prunus mume]	PLY18_ARATH RecName: Full=Probable pectate lyase 18; EC=4.2.2.2; AltName: Full=Pectate lyase A10; Flags: Precursor;	Q2Z1Y4_PRUMU RecName: Full=Pectate lyase {ECO:0000256|ARBA:ARBA00012272, ECO:0000256|RuleBase:RU361123}; EC=4.2.2.2 {ECO:0000256|ARBA:ARBA00012272, ECO:0000256|RuleBase:RU361123};	--	GO:0005829,cytosol; GO:0046872,metal ion binding; GO:0030570,pectate lyase activity; GO:0045490,pectin catabolic process; GO:0009624,response to nematode; GO:0003674,molecular_function; GO:0005488,binding; GO:0043167,ion binding; GO:0043169,cation binding; GO:0003824,catalytic activity; GO:0016829,lyase activity; GO:0016835,carbon-oxygen lyase activity; GO:0016837,carbon-oxygen lyase activity, ac…	PF00544.22:Pectate lyase	--	--	--
PmuVar_Chr7_1846	1504.33	1426.6	1455.91	88.1466	98.1477	89.6306	28571	30809	30999	1960	1823	1678	-3.6903	0	0	down	Chr7	13239878	13241679	+	PmuVar_Chr7_1846	--	K17893 ubiquinol oxidase [EC:1.10.3.11] | (RefSeq) ubiquinol oxidase 2, mitochondrial-like (A)	--	PREDICTED: ubiquinol oxidase 2, mitochondrial-like [Prunus mume]	AOX1A_ARATH RecName: Full=Ubiquinol oxidase 1a, mitochondrial; EC=1.10.3.11 {ECO:0000269|PubMed:9554960}; AltName: Full=Alternative oxidase 1a; Flags: Precursor;	A0A6J5XAA9_PRUAR RecName: Full=Ubiquinol oxidase {ECO:0000256|RuleBase:RU003779}; EC=1.10.3.11 {ECO:0000256|RuleBase:RU003779};	--	GO:0009507,chloroplast; GO:0016021,integral component of membrane; GO:0005743,mitochondrial inner membrane; GO:0005739,mitochondrion; GO:0070469,respirasome; GO:0009916,alternative oxidase activity; GO:0046872,metal ion binding; GO:0106292,superoxide-generating NADPH oxidase activity; GO:0102721,ubiquinol:oxygen oxidoreductase activity; GO:0010230,alternative respiration; GO:0045333,cellular resp…	PF01786.20:Alternative oxidase	--	--	--
PmuVar_Chr7_2191	3.8513	2.9144	2.4767	237.77	235.554	191.268	43	37	31	3108	2572	2105	6.48028	0	0	up	Chr7	16105607	16106158	-	PmuVar_Chr7_2191	--	--	--	PREDICTED: putative invertase inhibitor [Prunus mume]	PLA1_PLAAC RecName: Full=Putative invertase inhibitor; AltName: Full=Pollen allergen Pla a 1 {ECO:0000303|PubMed:11906336, ECO:0000303|PubMed:12859456, ECO:0000303|PubMed:16179793, ECO:0000303|PubMed:17177673, ECO:0000303|Ref.4}; AltName: Allergen=Pla a 1.0101 {ECO:0000305}; Flags: Precursor;	A0A6J5XB23_PRUAR RecName: Full=PMEI domain-containing protein {ECO:0000259|SMART:SM00856};	--	GO:0005783,endoplasmic reticulum; GO:0005576,extracellular region; GO:0043667,pollen wall; GO:0004857,enzyme inhibitor activity; GO:0009555,pollen development; GO:0009846,pollen germination; GO:0003674,molecular_function; GO:0030234,enzyme regulator activity; GO:0098772,molecular function regulator; GO:0007275,multicellular organism development; GO:0008150,biological_process; GO:0032501,multicell…	PF04043.18:Plant invertase/pectin methylesterase inhibitor	--	--	--
PmuVar_Chr7_2484	234.789	269.728	231.484	1873.18	1759.88	1746.15	2194	2866	2425	20493	16083	16084	3.17118	0	0	up	Chr7	18644091	18644552	-	PmuVar_Chr7_2484	--	--	--	PREDICTED: 14 kDa proline-rich protein DC2.15-like [Prunus mume]	14KD_DAUCA RecName: Full=14 kDa proline-rich protein DC2.15; Flags: Precursor;	M5WB35_PRUPE RecName: Full=AAI domain-containing protein {ECO:0000259|SMART:SM00499};	--	GO:0016021,integral component of membrane; GO:0005575,cellular_component; GO:0016020,membrane; GO:0031224,intrinsic component of membrane; GO:0110165,cellular anatomical entity	PF14547.9:Hydrophobic seed protein	--	--	--
PmuVar_Chr8_0202	313.19	305.474	317.411	11.5456	15.3195	11.3824	9407	10433	10688	406	450	337	-4.31612	0	0	down	Chr8	1250942	1257185	-	PmuVar_Chr8_0202	--	K13691 pathogen-inducible salicylic acid glucosyltransferase [EC:2.4.1.-] | (RefSeq) UDP-glycosyltransferase 74F2-like (A)	--	PREDICTED: UDP-glycosyltransferase 74F2-like [Prunus mume]	U74F2_ARATH RecName: Full=UDP-glycosyltransferase 74F2; EC=2.4.1.-; AltName: Full=AtSGT1; AltName: Full=Salicylic acid glucosyltransferase 1;	A0A6J5Y6X1_PRUAR RecName: Full=Glycosyltransferase {ECO:0000256|RuleBase:RU362057}; EC=2.4.1.- {ECO:0000256|RuleBase:RU362057};	UDP-glucuronosyl and UDP-glucosyl transferase	GO:0005829,cytosol; GO:0052641,benzoic acid glucosyltransferase activity; GO:0090704,nicotinate-O-glucosyltransferase activity; GO:0080043,quercetin 3-O-glucosyltransferase activity; GO:0080044,quercetin 7-O-glucosyltransferase activity; GO:0052639,salicylic acid glucosyltransferase (ester-forming) activity; GO:0052640,salicylic acid glucosyltransferase (glucoside-forming) activity; GO:0080002,UD…	PF00201.21:UDP-glucoronosyl and UDP-glucosyl transferase	--	--	--
PmuVar_Chr8_0351	16.8356	18.472	15.5364	347.054	367.197	376.668	521	650	539	12574	11113	11490	4.72455	0	0	up	Chr8	2014992	2017564	+	PmuVar_Chr8_0351	--	K07964 heparanase [EC:3.2.1.166] | (RefSeq) heparanase-like protein 3 (A)	ko00531: Glycosaminoglycan degradation; ko01100: Metabolic pathways	hypothetical protein GBA52_022398 [Prunus armeniaca]	HPSE3_ARATH RecName: Full=Heparanase-like protein 3; EC=3.2.-.-; Flags: Precursor;	M5VUR1_PRUPE SubName: Full=Uncharacterized protein {ECO:0000313|EMBL:EMJ04816.1};	--	GO:0005576,extracellular region; GO:0005765,lysosomal membrane; GO:0004566,beta-glucuronidase activity; GO:0003674,molecular_function; GO:0003824,catalytic activity; GO:0004553,hydrolase activity, hydrolyzing O-glycosyl compounds; GO:0016787,hydrolase activity; GO:0016798,hydrolase activity, acting on glycosyl bonds; GO:0005575,cellular_component; GO:0110165,cellular anatomical entity; GO:0000323…	PF03662.17:Glycosyl hydrolase family 79, N-terminal domain	--	--	--
PmuVar_Chr8_0387	173.455	173.582	177.143	1310.81	1197.3	1348.03	3147	3581	3603	27843	21244	24108	3.18239	0	0	up	Chr8	2254288	2255184	+	PmuVar_Chr8_0387	--	--	--	hypothetical protein GBA52_022434 [Prunus armeniaca]	PRF1_SOLLC RecName: Full=36.4 kDa proline-rich protein;	A0A6J5Y6A6_PRUAR RecName: Full=AAI domain-containing protein {ECO:0000259|SMART:SM00499};	--	--	PF14547.9:Hydrophobic seed protein	--	--	--
PmuVar_Chr8_0940	70.7601	59.3539	67.4354	797.667	677.937	708.83	541	516	578	7140	5069	5342	3.77178	0	0	up	Chr8	5319989	5320366	-	PmuVar_Chr8_0940	--	K14488 SAUR family protein | (RefSeq) uncharacterized protein LOC103340628 isoform X1 (A)	ko04075: Plant hormone signal transduction	auxin-responsive protein SAUR50 [Prunus persica]	SAU76_ARATH RecName: Full=Auxin-responsive protein SAUR76 {ECO:0000305}; AltName: Full=Protein SMALL AUXIN UP RNA 76 {ECO:0000303|PubMed:24312429};	M5VXZ9_PRUPE SubName: Full=Uncharacterized protein {ECO:0000313|EMBL:EMJ05961.1};	--	GO:0005737,cytoplasm; GO:0019897,extrinsic component of plasma membrane; GO:0005634,nucleus; GO:0009873,ethylene-activated signaling pathway; GO:0030307,positive regulation of cell growth; GO:0009733,response to auxin; GO:0000160,phosphorelay signal transduction system; GO:0007154,cell communication; GO:0007165,signal transduction; GO:0008150,biological_process; GO:0009719,response to endogenous …	PF02519.17:Auxin responsive protein	--	--	--
PmuVar_Chr8_1563	37.9109	45.7717	37.5937	727.248	534.385	660.894	582	799	647	13071	8023	10001	4.29024	0	0	up	Chr8	9203492	9204362	-	PmuVar_Chr8_1563	--	K09873 aquaporin TIP | (RefSeq) aquaporin TIP1-1 (A)	--	hypothetical protein GBA52_023648 [Prunus armeniaca]	TIP11_ARATH RecName: Full=Aquaporin TIP1-1; AltName: Full=Aquaporin TIP; AltName: Full=Gamma-tonoplast intrinsic protein; Short=Gamma-TIP; AltName: Full=Tonoplast intrinsic protein 1-1; Short=AtTIP1;1; AltName: Full=Tonoplast intrinsic protein, root-specific RB7;	A0A6J5XVP7_PRUAR SubName: Full=Uncharacterized protein {ECO:0000313|EMBL:CAB4317719.1};	Aquaporin (major intrinsic protein family)	GO:0042807,central vacuole; GO:0009941,chloroplast envelope; GO:0016021,integral component of membrane; GO:0016020,membrane; GO:0000325,plant-type vacuole; GO:0009705,plant-type vacuole membrane; GO:0000326,protein storage vacuole; GO:0015204,urea transmembrane transporter activity; GO:0015250,water channel activity; GO:0080170,hydrogen peroxide transmembrane transport; GO:0015840,urea transport;…	PF00230.23:Major intrinsic protein	--	--	--
PmuVar_Chr8_2009	545.19	573.913	524.331	7.6124	10.4367	7.324	10950	13107	11806	179	205	145	-5.72231	0	0	down	Chr8	12748513	12766486	+	PmuVar_Chr8_2009	--	K13466 EIX receptor 1/2 | (RefSeq) LOW QUALITY PROTEIN: probable LRR receptor-like serine/threonine-protein kinase At4g36180 (A)	ko04626: Plant-pathogen interaction	polygalacturonase inhibitor [Prunus persica]	PGIP_PYRCO RecName: Full=Polygalacturonase inhibitor; AltName: Full=Polygalacturonase-inhibiting protein; Short=PGIG; Flags: Precursor;	M5VUN1_PRUPE RecName: Full=LRRNT_2 domain-containing protein {ECO:0000259|Pfam:PF08263};	--	GO:0048046,apoplast; GO:0005575,cellular_component; GO:0005576,extracellular region; GO:0110165,cellular anatomical entity	PF13855.9:Leucine rich repeat	--	--	--
PmuVar_Chr8_2211	3.094	4.0537	3.8018	79.6049	79.2535	79.2708	98	146	135	2952	2455	2475	4.73947	0	0	up	Chr8	14352658	14354223	-	PmuVar_Chr8_2211	--	--	--	PREDICTED: uncharacterized protein LOC103322025 [Prunus mume]	--	A0A5E4FSC9_PRUDU SubName: Full=PREDICTED {ECO:0000313|EMBL:VVA30354.1};	--	GO:0016021,integral component of membrane; GO:0005575,cellular_component; GO:0016020,membrane; GO:0031224,intrinsic component of membrane; GO:0110165,cellular anatomical entity	--	--	--	--
PmuVar_Chr8_2307	82.634	88.4645	75.1665	888.611	833.432	984.997	1063	1294	1084	13383	10485	12490	3.76129	0	0	up	Chr8	15289087	15289722	-	PmuVar_Chr8_2307	--	--	--	PREDICTED: glucan endo-1,3-beta-glucosidase-like [Prunus mume]	TLP_PRUAV RecName: Full=Glucan endo-1,3-beta-glucosidase; EC=3.2.1.39; AltName: Full=(1->3)-beta-glucan endohydrolase; Short=(1->3)-beta-glucanase; AltName: Full=Allergen Pru a 2; AltName: Full=Beta-1,3-endoglucanase; AltName: Full=Thaumatin-like protein; Short=TLP; AltName: Allergen=Pru av 2; Flags: Precursor;	A0A5E4GM68_PRUDU SubName: Full=PREDICTED: thaumatin {ECO:0000313|EMBL:VVA40671.1};	--	GO:0005576,extracellular region; GO:0042973,glucan endo-1,3-beta-D-glucosidase activity; GO:0019863,IgE binding; GO:0008152,metabolic process; GO:0003674,molecular_function; GO:0003824,catalytic activity; GO:0004553,hydrolase activity, hydrolyzing O-glycosyl compounds; GO:0008422,beta-glucosidase activity; GO:0015926,glucosidase activity; GO:0016787,hydrolase activity; GO:0016798,hydrolase activi…	PF00314.20:Thaumatin family	--	--	--
PmuVar_Chr8_2999	112.629	123.005	120.367	629.105	609.205	693.421	5235	6501	6272	34234	27692	31770	2.74303	0	0	up	Chr8	23019405	23022886	+	PmuVar_Chr8_2999	--	K00549 5-methyltetrahydropteroyltriglutamate--homocysteine methyltransferase [EC:2.1.1.14] | (RefSeq) 5-methyltetrahydropteroyltriglutamate-- homocysteine methyltransferase (A)	ko00270: Cysteine and methionine metabolism; ko00450: Selenocompound metabolism; ko01100: Metabolic pathways; ko01110: Biosynthesis of secondary metabolites; ko01230: Biosynthesis of amino acids	unnamed protein product [Prunus armeniaca]	METE_CATRO RecName: Full=5-methyltetrahydropteroyltriglutamate--homocysteine methyltransferase; EC=2.1.1.14; AltName: Full=Cobalamin-independent methionine synthase isozyme; AltName: Full=Vitamin-B12-independent methionine synthase isozyme;	A0A6J5XRA8_PRUAR RecName: Full=5-methyltetrahydropteroyltriglutamate--homocysteine S-methyltransferase {ECO:0000256|ARBA:ARBA00012034}; EC=2.1.1.14 {ECO:0000256|ARBA:ARBA00012034};	Methionine synthase II (cobalamin-independent)	GO:0005737,cytoplasm; GO:0003871,5-methyltetrahydropteroyltriglutamate-homocysteine S-methyltransferase activity; GO:0008270,zinc ion binding; GO:0009086,methionine biosynthetic process; GO:0032259,methylation; GO:0003674,molecular_function; GO:0003824,catalytic activity; GO:0008168,methyltransferase activity; GO:0008172,S-methyltransferase activity; GO:0016740,transferase activity; GO:0016741,tr…	PF01717.21:Cobalamin-independent synthase, Catalytic domain	--	--	--
PmuVar_Chr2_1149	733.23	740.794	821.082	77.4206	65.3345	59.9443	21356	24534	26810	2640	1861	1721	-3.19728	2.7976e-305	8.82613e-303	down	Chr2	9293786	9297686	+	PmuVar_Chr2_1149	--	K10144 RING finger and CHY zinc finger domain-containing protein 1 [EC:2.3.2.27] | (RefSeq) E3 ubiquitin-protein ligase MIEL1 (A)	ko04120: Ubiquitin mediated proteolysis	PREDICTED: E3 ubiquitin-protein ligase MIEL1 [Prunus mume]	ZFP34_ORYSJ RecName: Full=Probable E3 ubiquitin-protein ligase RZFP34 {ECO:0000305}; EC=2.3.2.27 {ECO:0000305}; AltName: Full=OsRFP1 {ECO:0000303|Ref.1}; AltName: Full=RING zinc-finger protein 34 {ECO:0000303|PubMed:25002225}; Short=OsRZFP34 {ECO:0000303|PubMed:25002225};	M5XSG8_PRUPE SubName: Full=Uncharacterized protein {ECO:0000313|EMBL:EMJ24503.1};	Zn-finger protein	GO:0005634,nucleus; GO:0061630,ubiquitin protein ligase activity; GO:0008270,zinc ion binding; GO:0016567,protein ubiquitination; GO:0006511,ubiquitin-dependent protein catabolic process; GO:0003674,molecular_function; GO:0003824,catalytic activity; GO:0004842,ubiquitin-protein transferase activity; GO:0016740,transferase activity; GO:0019787,ubiquitin-like protein transferase activity; GO:006165…	PF14599.9:Zinc-ribbon	--	--	--
PmuVar_Chr4_2703	64.1518	67.126	67.9534	518.966	449.774	404.963	2176	2589	2584	20609	14920	13540	3.08767	6.45907e-298	1.99701e-295	up	Chr4	21534688	21539260	+	PmuVar_Chr4_2703	--	K14497 protein phosphatase 2C [EC:3.1.3.16] | (RefSeq) protein phosphatase 2C 37-like (A)	ko04016: MAPK signaling pathway - plant; ko04075: Plant hormone signal transduction	probable protein phosphatase 2C 52 [Prunus persica]	P2C52_ARATH RecName: Full=Probable protein phosphatase 2C 52; Short=AtPP2C52; EC=3.1.3.16;	M5X4T1_PRUPE RecName: Full=PPM-type phosphatase domain-containing protein {ECO:0000259|PROSITE:PS51746};	Serine/threonine protein phosphatase	GO:0005886,plasma membrane; GO:0046872,metal ion binding; GO:0017018,myosin phosphatase activity; GO:0004721,phosphoprotein phosphatase activity; GO:0004722,protein serine/threonine phosphatase activity; GO:0035970,peptidyl-threonine dephosphorylation; GO:0006470,protein dephosphorylation; GO:0003674,molecular_function; GO:0005488,binding; GO:0043167,ion binding; GO:0043169,cation binding; GO:000…	PF00481.24:Protein phosphatase 2C	--	--	--
PmuVar_Chr1_0792	69.1959	71.4612	73.8269	326.024	316.51	307.375	1331	1563	1592	7342	5954	5828	2.44898	1.26708e-292	3.84074e-290	up	Chr1	8639696	8641808	-	PmuVar_Chr1_0792	--	K17098 annexin D | (RefSeq) annexin D2-like (A)	--	PREDICTED: annexin D2-like [Prunus mume]	ANXD2_ARATH RecName: Full=Annexin D2; AltName: Full=AnnAt2;	A0A6J5V6G6_PRUAR RecName: Full=Annexin {ECO:0000256|RuleBase:RU003540};	Annexin	GO:0005829,cytosol; GO:0016020,membrane; GO:0009536,plastid; GO:0009579,thylakoid; GO:0005509,calcium ion binding; GO:0005544,calcium-dependent phospholipid binding; GO:0110128,phloem sucrose unloading; GO:0015774,polysaccharide transport; GO:0080022,primary root development; GO:0009409,response to cold; GO:0009408,response to heat; GO:0009651,response to salt stress; GO:0009414,response to water…	PF00191.23:Annexin	--	--	--
PmuVar_Chr2_2148	17.3719	20.709	21.6824	196.394	179.423	222.003	526	713	736	6962	5313	6626	3.62549	2.27116e-292	6.75188e-290	up	Chr2	15318319	15322689	-	PmuVar_Chr2_2148	--	K00423 L-ascorbate oxidase [EC:1.10.3.3] | (RefSeq) L-ascorbate oxidase homolog (A)	ko00053: Ascorbate and aldarate metabolism; ko01100: Metabolic pathways	PREDICTED: L-ascorbate oxidase homolog [Prunus mume]	ASOL_BRANA RecName: Full=L-ascorbate oxidase homolog; EC=1.10.3.-; Flags: Precursor;	A0A6J5TR16_PRUAR SubName: Full=Uncharacterized protein {ECO:0000313|EMBL:CAB4265485.1};	Multicopper oxidases	GO:0005576,extracellular region; GO:0005507,copper ion binding; GO:0016491,oxidoreductase activity; GO:0003674,molecular_function; GO:0005488,binding; GO:0043167,ion binding; GO:0043169,cation binding; GO:0046872,metal ion binding; GO:0046914,transition metal ion binding; GO:0003824,catalytic activity; GO:0005575,cellular_component; GO:0110165,cellular anatomical entity	PF00394.25:Multicopper oxidase	--	--	--
PmuVar_Chr2_2346	8.3343	7.6194	6.8462	85.7057	92.7794	86.8429	177	184	163	2131	1927	1818	3.84442	4.16444e-290	1.21468e-287	up	Chr2	16600557	16602587	+	PmuVar_Chr2_2346	--	K14379 tartrate-resistant acid phosphatase type 5 [EC:3.1.3.2] | (RefSeq) purple acid phosphatase 8-like (A)	ko00740: Riboflavin metabolism; ko01100: Metabolic pathways	PREDICTED: purple acid phosphatase 8-like [Prunus mume]	PPA8_ARATH RecName: Full=Purple acid phosphatase 8; EC=3.1.3.2; Flags: Precursor;	A0A6J5W8B5_PRUAR RecName: Full=Purple acid phosphatase {ECO:0000256|PIRNR:PIRNR000898}; EC=3.1.3.2 {ECO:0000256|PIRNR:PIRNR000898};	Purple (tartrate-resistant) acid phosphatase	GO:0005576,extracellular region; GO:0003993,acid phosphatase activity; GO:0008199,ferric iron binding; GO:0008198,ferrous iron binding; GO:0016311,dephosphorylation; GO:0003674,molecular_function; GO:0003824,catalytic activity; GO:0016787,hydrolase activity; GO:0016788,hydrolase activity, acting on ester bonds; GO:0016791,phosphatase activity; GO:0042578,phosphoric ester hydrolase activity; GO:00…	PF00149.31:Calcineurin-like phosphoesterase	--	--	--
PmuVar_Chr4_3324	8.9504	9.0584	10.0115	70.2408	77.4538	82.826	378	435	474	3473	3199	3448	3.342	6.85313e-290	1.9619e-287	up	Chr4	25963616	25966274	+	PmuVar_Chr4_3324	--	K20887 xyloglucan glycosyltransferase 4 [EC:2.4.1.-] | (RefSeq) xyloglucan glycosyltransferase 4 (A)	--	PREDICTED: probable xyloglucan glycosyltransferase 5 [Prunus mume]	CSLC5_ARATH RecName: Full=Probable xyloglucan glycosyltransferase 5 {ECO:0000303|PubMed:11027699}; EC=2.4.1.- {ECO:0000250|UniProtKB:Q9LJP4}; AltName: Full=Cellulose synthase-like protein C5 {ECO:0000303|PubMed:11027699}; Short=AtCslC5 {ECO:0000303|PubMed:11027699};	A0A5E4FZ92_PRUDU SubName: Full=PREDICTED: probable xyloglucan {ECO:0000313|EMBL:VVA32875.1};	--	GO:0005794,Golgi apparatus; GO:0000139,Golgi membrane; GO:0016021,integral component of membrane; GO:0016757,transferase activity, transferring glycosyl groups; GO:0042803,protein homodimerization activity; GO:0071555,cell wall organization; GO:0099402,plant organ development; GO:0048868,pollen tube development; GO:0003674,molecular_function; GO:0003824,catalytic activity; GO:0016740,transferase …	PF13632.9:Glycosyl transferase family group 2	--	--	--
PmuVar_Chr2_3422	15.2194	17.8198	14.4595	213.378	193.377	225.203	169	225	180	2774	2100	2465	4.03576	4.84497e-285	1.36179e-282	up	Chr2	23931667	23933281	+	PmuVar_Chr2_3422	--	--	--	PREDICTED: non-specific lipid transfer protein GPI-anchored 1 [Prunus mume]	LTPG1_ARATH RecName: Full=Non-specific lipid transfer protein GPI-anchored 1 {ECO:0000303|PubMed:19321705, ECO:0000303|PubMed:19366900, ECO:0000303|PubMed:23893219}; Short=AtLTPG-1 {ECO:0000303|PubMed:19321705, ECO:0000303|PubMed:19366900, ECO:0000303|PubMed:23893219}; Short=Protein LTP-GPI-ANCHORED 1 {ECO:0000303|PubMed:19321705, ECO:0000303|PubMed:19366900, ECO:0000303|PubMed:23893219}; Flags: …	A0A6J5TJH1_PRUAR RecName: Full=AAI domain-containing protein {ECO:0000259|SMART:SM00499};	--	GO:0031225,anchored component of membrane; GO:0046658,anchored component of plasma membrane; GO:0005783,endoplasmic reticulum; GO:0005576,extracellular region; GO:0005794,Golgi apparatus; GO:0005634,nucleus; GO:0009505,plant-type cell wall; GO:0005886,plasma membrane; GO:0099503,secretory vesicle; GO:0008289,lipid binding; GO:0042335,cuticle development; GO:0050832,defense response to fungus; GO:…	PF14368.9:Probable lipid transfer	--	--	--
PmuVar_Chr6_1491	44.4654	44.0271	40.2182	454.431	419.061	371.444	286	322	290	3422	2636	2355	3.57643	1.23098e-275	3.39816e-273	up	Chr6	11256226	11256543	+	PmuVar_Chr6_1491	--	--	--	PREDICTED: putative lipid-transfer protein DIR1 [Prunus mume]	DIRL1_ARATH RecName: Full=Putative lipid-transfer protein DIR1; AltName: Full=Protein DEFECTIVE IN INDUCED RESISTANCE 1; Flags: Precursor;	A0A5E4GPJ4_PRUDU SubName: Full=PREDICTED: putative lipid-transfer DIR1 {ECO:0000313|EMBL:VVA41556.1};	--	GO:0048046,apoplast; GO:0005783,endoplasmic reticulum; GO:0009506,plasmodesma; GO:0099503,secretory vesicle; GO:0005504,fatty acid binding; GO:0043621,protein self-association; GO:0008270,zinc ion binding; GO:0006869,lipid transport; GO:0009627,systemic acquired resistance; GO:0009862,systemic acquired resistance, salicylic acid mediated signaling pathway; GO:0003674,molecular_function; GO:000548…	PF14368.9:Probable lipid transfer	--	--	--
PmuVar_Chr7_0548	193.184	193.977	179.524	756.931	732.528	746.019	4642	5300	4836	21294	17214	17670	2.28197	8.43076e-275	2.28651e-272	up	Chr7	4734485	4737526	+	PmuVar_Chr7_0548	--	K00001 alcohol dehydrogenase [EC:1.1.1.1] | (RefSeq) alcohol dehydrogenase-like 4 (A)	ko00010: Glycolysis / Gluconeogenesis; ko00071: Fatty acid degradation; ko00350: Tyrosine metabolism; ko00620: Pyruvate metabolism; ko01100: Metabolic pathways; ko01110: Biosynthesis of secondary metabolites	PREDICTED: alcohol dehydrogenase-like 4 [Prunus mume]	ADHL3_ARATH RecName: Full=Alcohol dehydrogenase-like 3; EC=1.1.1.1 {ECO:0000250|UniProtKB:P06525};	A0A6J5UWJ3_PRUAR SubName: Full=Uncharacterized protein {ECO:0000313|EMBL:CAB4280311.1};	Alcohol dehydrogenase, class III	GO:0005829,cytosol; GO:0004024,alcohol dehydrogenase activity, zinc-dependent; GO:0051903,S-(hydroxymethyl)glutathione dehydrogenase activity; GO:0008270,zinc ion binding; GO:0046294,formaldehyde catabolic process; GO:0003674,molecular_function; GO:0003824,catalytic activity; GO:0004022,alcohol dehydrogenase (NAD+) activity; GO:0016491,oxidoreductase activity; GO:0016614,oxidoreductase activity, …	PF08240.15:Alcohol dehydrogenase GroES-like domain	--	--	--
PmuVar_Chr4_3017	75.0429	75.7465	79.3512	8.8285	10.6329	9.6607	5997	6883	7109	826	831	761	-2.68306	6.8434e-272	1.824e-269	down	Chr4	23557365	23563774	-	PmuVar_Chr4_3017	--	K14300 nuclear pore complex protein Nup133 | (RefSeq) nuclear pore complex protein NUP133 isoform X1 (A)	ko03013: Nucleocytoplasmic transport	PREDICTED: nuclear pore complex protein NUP133 isoform X1 [Prunus mume]	NU133_ARATH RecName: Full=Nuclear pore complex protein NUP133 {ECO:0000303|PubMed:21189294}; AltName: Full=Nucleoporin 133 {ECO:0000303|PubMed:21189294}; AltName: Full=Nucleoporin Nup155-like;	A0A6J5UF25_PRUAR SubName: Full=Uncharacterized protein {ECO:0000313|EMBL:CAB4274492.1};	--	GO:0031080,nuclear pore outer ring; GO:0017056,structural constituent of nuclear pore; GO:0016973,poly(A)+ mRNA export from nucleus; GO:0006606,protein import into nucleus; GO:0000972,transcription-dependent tethering of RNA polymerase II gene DNA at nuclear periphery; GO:0003674,molecular_function; GO:0005198,structural molecule activity; GO:0006403,RNA localization; GO:0006405,RNA export from n…	PF08801.14:Nup133 N terminal like	--	--	--
PmuVar_Chr1_3934	0.3343	0.6174	0.6858	79.6335	89.6922	94.4467	10	21	23	2789	2624	2785	7.61415	3.84471e-271	1.00738e-268	up	Chr1	30402968	30529039	+	PmuVar_Chr1_3934	--	K13356 alcohol-forming fatty acyl-CoA reductase [EC:1.2.1.84] | (RefSeq) fatty acyl-CoA reductase 3-like (A)	ko00073: Cutin, suberine and wax biosynthesis; ko04146: Peroxisome	PREDICTED: fatty acyl-CoA reductase 3-like [Prunus mume]	FAR_SIMCH RecName: Full=Alcohol-forming fatty acyl-CoA reductase; EC=1.2.1.84;	A0A6J5XI61_PRUAR RecName: Full=Fatty acyl-CoA reductase {ECO:0000256|RuleBase:RU363097}; EC=1.2.1.84 {ECO:0000256|RuleBase:RU363097};	Acyl-CoA reductase	GO:0102965,alcohol-forming fatty acyl-CoA reductase activity; GO:0080019,fatty-acyl-CoA reductase (alcohol-forming) activity; GO:0006629,lipid metabolic process; GO:0003674,molecular_function; GO:0003824,catalytic activity; GO:0016491,oxidoreductase activity; GO:0016620,oxidoreductase activity, acting on the aldehyde or oxo group of donors, NAD or NADP as acceptor; GO:0016903,oxidoreductase activ…	PF07993.15:Male sterility protein	--	--	--
PmuVar_Chr1_3607	75.8555	74.0603	74.9619	396.138	351.969	366.275	1298	1441	1438	7936	5890	6178	2.61222	3.35233e-268	8.63729e-266	up	Chr1	27520617	27522123	-	PmuVar_Chr1_3607	--	K09872 aquaporin PIP | (RefSeq) aquaporin PIP2-2 (A)	--	aquaporin PIP2-2 [Prunus mume]	PIP22_ARATH RecName: Full=Aquaporin PIP2-2; AltName: Full=Plasma membrane intrinsic protein 2-2; Short=AtPIP2;2; AltName: Full=Plasma membrane intrinsic protein 2b; Short=PIP2b; AltName: Full=TMP2b;	Q2Z1Z2_PRUMU SubName: Full=Aquaporin {ECO:0000313|EMBL:BAE48656.1};	Aquaporin (major intrinsic protein family)	GO:0005783,endoplasmic reticulum; GO:0016021,integral component of membrane; GO:0005886,plasma membrane; GO:0009506,plasmodesma; GO:0003729,mRNA binding; GO:0015250,water channel activity; GO:0009414,response to water deprivation; GO:0006833,water transport; GO:0003674,molecular_function; GO:0003676,nucleic acid binding; GO:0003723,RNA binding; GO:0005488,binding; GO:0097159,organic cyclic compou…	PF00230.23:Major intrinsic protein	--	--	--
PmuVar_Chr4_2476	2.0098	2.5923	2.6692	60.9599	61.4234	62.6167	45	66	67	1598	1345	1382	4.96452	1.18524e-265	3.0037e-263	up	Chr4	19914988	19918947	-	PmuVar_Chr4_2476	--	--	--	PREDICTED: LOW QUALITY PROTEIN: uncharacterized protein LOC103330103 [Prunus mume]	--	A0A6J5UF68_PRUAR RecName: Full=AB hydrolase-1 domain-containing protein {ECO:0000259|Pfam:PF12697};	Predicted hydrolase/acyltransferase (alpha/beta hydrolase superfamily)	GO:0003824,catalytic activity; GO:0003674,molecular_function	PF12697.10:Alpha/beta hydrolase family	--	--	--
PmuVar_Chr2_1515	288.833	279.565	274.054	1447.73	1244.17	1351.48	4364	4803	4642	25609	18384	20128	2.56608	1.15153e-263	2.87122e-261	up	Chr2	11620695	11625345	+	PmuVar_Chr2_1515	--	K00759 adenine phosphoribosyltransferase [EC:2.4.2.7] | (RefSeq) adenine phosphoribosyltransferase 1 isoform X1 (A)	ko00230: Purine metabolism; ko01100: Metabolic pathways; ko01232: Nucleotide metabolism	PREDICTED: adenine phosphoribosyltransferase 1 isoform X1 [Prunus mume]	APT1_ARATH RecName: Full=Adenine phosphoribosyltransferase 1, chloroplastic; Short=APRT 1; Short=AtAPT1; EC=2.4.2.7; Flags: Precursor;	A0A6J5W5C7_PRUAR RecName: Full=Adenine phosphoribosyltransferase {ECO:0000256|ARBA:ARBA00011893}; EC=2.4.2.7 {ECO:0000256|ARBA:ARBA00011893};	Adenine phosphoribosyl transferases	GO:0009507,chloroplast; GO:0005829,cytosol; GO:0003999,adenine phosphoribosyltransferase activity; GO:0006168,adenine salvage; GO:0044209,AMP salvage; GO:0009690,cytokinin metabolic process; GO:0006166,purine ribonucleoside salvage; GO:0003674,molecular_function; GO:0003824,catalytic activity; GO:0016740,transferase activity; GO:0016757,transferase activity, transferring glycosyl groups; GO:00167…	PF00156.30:Phosphoribosyl transferase domain	--	--	--
PmuVar_Chr4_1063	7.5188	6.4202	5.4201	97.0418	85.2407	98.2736	172	167	139	2599	1907	2216	4.16462	1.01767e-262	2.49716e-260	up	Chr4	10222134	10225524	-	PmuVar_Chr4_1063	--	--	--	PREDICTED: uncharacterized protein LOC103328032 [Prunus mume]	--	A0A6J5UC66_PRUAR SubName: Full=Uncharacterized protein {ECO:0000313|EMBL:CAB4272725.1};	--	--	PF04862.15:Protein of unknown function (DUF642)	--	--	--
PmuVar_Chr6_1295	19.8359	17.3134	15.0996	183.759	168.972	184.589	266	264	227	2885	2216	2440	3.66795	1.45192e-261	3.50706e-259	up	Chr6	10285576	10287499	+	PmuVar_Chr6_1295	--	--	--	PREDICTED: GDSL esterase/lipase At4g28780 [Prunus mume]	GDL67_ARATH RecName: Full=GDSL esterase/lipase At4g28780; EC=3.1.1.-; AltName: Full=Extracellular lipase At4g28780; Flags: Precursor;	A0A6J5VU07_PRUAR SubName: Full=Uncharacterized protein {ECO:0000313|EMBL:CAB4291362.1};	--	GO:0005576,extracellular region; GO:0016788,hydrolase activity, acting on ester bonds; GO:0016042,lipid catabolic process; GO:0003674,molecular_function; GO:0003824,catalytic activity; GO:0016787,hydrolase activity; GO:0006629,lipid metabolic process; GO:0008150,biological_process; GO:0008152,metabolic process; GO:0009056,catabolic process; GO:0044238,primary metabolic process; GO:0071704,organic…	PF00657.25:GDSL-like Lipase/Acylhydrolase	--	--	--
PmuVar_Chr1_1774	1245.93	1233.41	1238.15	204.744	212.987	178.063	20110	22637	22404	3869	3362	2833	-2.3405	1.19336e-259	2.83818e-257	down	Chr1	15547319	15549211	-	PmuVar_Chr1_1774	--	K00522 ferritin heavy chain [EC:1.16.3.2] | (RefSeq) ferritin-4, chloroplastic (A)	--	PREDICTED: ferritin-4, chloroplastic [Prunus mume]	FRI3_SOYBN RecName: Full=Ferritin-3, chloroplastic; EC=1.16.3.1; AltName: Full=SFerH-3; Flags: Precursor;	A0A6J5XTV8_PRUAR RecName: Full=Ferritin {ECO:0000256|RuleBase:RU361145}; EC=1.16.3.1 {ECO:0000256|RuleBase:RU361145};	Ferritin	GO:0009507,chloroplast; GO:0005737,cytoplasm; GO:0008199,ferric iron binding; GO:0008198,ferrous iron binding; GO:0004322,ferroxidase activity; GO:0006880,intracellular sequestering of iron ion; GO:0006826,iron ion transport; GO:0003674,molecular_function; GO:0005488,binding; GO:0005506,iron ion binding; GO:0043167,ion binding; GO:0043169,cation binding; GO:0046872,metal ion binding; GO:0046914,t…	PF00210.27:Ferritin-like domain	--	--	--
PmuVar_Chr4_1791	7.3766	5.1204	6.756	63.597	64.9084	64.6983	299	236	307	3018	2573	2585	3.63291	3.41682e-259	8.00312e-257	up	Chr4	16024913	16029830	-	PmuVar_Chr4_1791	--	K01897 long-chain acyl-CoA synthetase [EC:6.2.1.3] | (RefSeq) long chain acyl-CoA synthetase 1 (A)	ko00061: Fatty acid biosynthesis; ko00071: Fatty acid degradation; ko01100: Metabolic pathways; ko01212: Fatty acid metabolism; ko04146: Peroxisome	hypothetical protein GBA52_009191 [Prunus armeniaca]	LACS1_ARATH RecName: Full=Long chain acyl-CoA synthetase 1; EC=6.2.1.3; AltName: Full=Protein ECERIFERUM 8;	A0A6J5WPZ1_PRUAR RecName: Full=Long-chain-fatty-acid--CoA ligase {ECO:0000256|ARBA:ARBA00026121, ECO:0000256|RuleBase:RU369030}; EC=6.2.1.3 {ECO:0000256|ARBA:ARBA00026121, ECO:0000256|RuleBase:RU369030};	Long-chain acyl-CoA synthetases (AMP-forming)	GO:0005783,endoplasmic reticulum; GO:0016020,membrane; GO:0005524,ATP binding; GO:0004467,long-chain fatty acid-CoA ligase activity; GO:0031957,very long-chain fatty acid-CoA ligase activity; GO:0010143,cutin biosynthetic process; GO:0006631,fatty acid metabolic process; GO:0010025,wax biosynthetic process; GO:0000166,nucleotide binding; GO:0003674,molecular_function; GO:0005488,binding; GO:00170…	PF00501.31:AMP-binding enzyme	--	--	--
PmuVar_Chr3_0092	30.4481	31.638	31.7315	278.096	241.161	241.711	303	358	354	3240	2347	2371	3.32273	8.69171e-259	2.00545e-256	up	Chr3	520540	521347	-	PmuVar_Chr3_0092	--	--	--	PREDICTED: fruit protein pKIWI501 [Prunus mume]	--	A0A5E4FTJ5_PRUDU SubName: Full=PREDICTED: major latex allergen {ECO:0000313|EMBL:VVA30690.1};	--	--	--	--	--	--
PmuVar_Chr4_2349	282.434	296.628	267.725	1170.39	1098.32	1130.74	4850	5792	5154	23530	18445	19140	2.30734	1.60951e-254	3.65904e-252	up	Chr4	19201337	19203646	-	PmuVar_Chr4_2349	--	K20628 expansin | (RefSeq) expansin-A15 (A)	--	hypothetical protein L3X38_020237 [Prunus dulcis]	EXP15_ARATH RecName: Full=Expansin-A15; Short=AtEXPA15; AltName: Full=Alpha-expansin-15; Short=At-EXP15; Short=AtEx15; AltName: Full=Ath-ExpAlpha-1.3; Flags: Precursor;	A0A5E4EZ61_PRUDU RecName: Full=Expansin {ECO:0000256|RuleBase:RU365023};	--	GO:0005576,extracellular region; GO:0016020,membrane; GO:0009664,plant-type cell wall organization; GO:0006949,syncytium formation; GO:0008150,biological_process; GO:0009987,cellular process; GO:0016043,cellular component organization; GO:0045229,external encapsulating structure organization; GO:0071554,cell wall organization or biogenesis; GO:0071555,cell wall organization; GO:0071669,plant-type…	PF01357.24:Expansin C-terminal domain	--	--	--
PmuVar_Chr8_1804	10.8259	14.2508	14.8542	149.452	133.155	167.504	314	470	483	5075	3777	4789	3.7971	1.00198e-250	2.24488e-248	up	Chr8	10986859	10988292	+	PmuVar_Chr8_1804	--	K22683 aspartyl protease family protein [EC:3.4.23.-] | (RefSeq) aspartyl protease family protein At5g10770 (A)	--	PREDICTED: aspartic proteinase nepenthesin-2-like [Prunus mume]	ASP63_ARATH RecName: Full=Probable aspartyl protease At4g16563 {ECO:0000305}; EC=3.4.23.- {ECO:0000305}; Flags: Precursor;	A0A6J5VHE2_PRUAR RecName: Full=Peptidase A1 domain-containing protein {ECO:0000259|PROSITE:PS51767};	Aspartyl protease	GO:0009505,plant-type cell wall; GO:0004190,aspartic-type endopeptidase activity; GO:0006508,proteolysis; GO:0003674,molecular_function; GO:0003824,catalytic activity; GO:0004175,endopeptidase activity; GO:0008233,peptidase activity; GO:0016787,hydrolase activity; GO:0070001,aspartic-type peptidase activity; GO:0140096,catalytic activity, acting on a protein; GO:0006807,nitrogen compound metaboli…	PF14541.9:Xylanase inhibitor C-terminal	--	--	--
PmuVar_Chr8_0773	89.2331	93.8175	93.9635	11.5706	10.429	11.7452	4532	5418	5350	688	518	588	-2.73336	7.05146e-250	1.55726e-247	down	Chr8	4379918	4384887	+	PmuVar_Chr8_0773	--	K12309 beta-galactosidase [EC:3.2.1.23] | (RefSeq) beta-galactosidase 17 isoform X1 (A)	ko00052: Galactose metabolism; ko00511: Other glycan degradation; ko00531: Glycosaminoglycan degradation; ko00600: Sphingolipid metabolism; ko00604: Glycosphingolipid biosynthesis - ganglio series; ko01100: Metabolic pathways	PREDICTED: LOW QUALITY PROTEIN: beta-galactosidase [Prunus mume]	BGAL_MALDO RecName: Full=Beta-galactosidase; EC=3.2.1.23; AltName: Full=Acid beta-galactosidase; Short=Lactase; AltName: Full=Exo-(1-->4)-beta-D-galactanase; Flags: Precursor;	A0A5E4E6F5_PRUDU RecName: Full=Beta-galactosidase {ECO:0000256|ARBA:ARBA00012756, ECO:0000256|RuleBase:RU000675}; EC=3.2.1.23 {ECO:0000256|ARBA:ARBA00012756, ECO:0000256|RuleBase:RU000675};	Beta-galactosidase	GO:0048046,apoplast; GO:0004565,beta-galactosidase activity; GO:0005975,carbohydrate metabolic process; GO:0003674,molecular_function; GO:0003824,catalytic activity; GO:0004553,hydrolase activity, hydrolyzing O-glycosyl compounds; GO:0015925,galactosidase activity; GO:0016787,hydrolase activity; GO:0016798,hydrolase activity, acting on glycosyl bonds; GO:0008150,biological_process; GO:0008152,met…	PF01301.22:Glycosyl hydrolases family 35	--	--	--
PmuVar_Chr1_3619	4.1429	3.9454	3.8997	47.6841	43.1117	53.6399	181	196	191	2439	1842	2310	3.89562	5.23142e-249	1.13905e-246	up	Chr1	27611917	27615383	-	PmuVar_Chr1_3619	--	K14486 auxin response factor | (RefSeq) auxin response factor 7 isoform X1 (A)	ko04075: Plant hormone signal transduction	PREDICTED: auxin response factor 18-like [Prunus mume]	ARFR_ORYSJ RecName: Full=Auxin response factor 18; AltName: Full=OsARF10;	A0A6J5XM20_PRUAR RecName: Full=Auxin response factor {ECO:0000256|RuleBase:RU004561};	--	GO:0005634,nucleus; GO:0003677,DNA binding; GO:0009734,auxin-activated signaling pathway; GO:0006355,regulation of transcription, DNA-templated; GO:0003674,molecular_function; GO:0003676,nucleic acid binding; GO:0005488,binding; GO:0097159,organic cyclic compound binding; GO:1901363,heterocyclic compound binding; GO:0007154,cell communication; GO:0007165,signal transduction; GO:0008150,biological…	PF06507.16:Auxin response factor	B3-ARF	TF	B3->B3-ARF
PmuVar_Chr2_2001	50.4076	49.8942	62.5039	376.382	328.913	368.389	1251	1408	1739	10936	7983	9012	3.02564	1.89774e-246	4.0746e-244	up	Chr2	14441625	14443806	-	PmuVar_Chr2_2001	--	--	--	PREDICTED: protein WALLS ARE THIN 1 [Prunus mume]	WAT1_ARATH RecName: Full=Protein WALLS ARE THIN 1;	A0A6J5W8T2_PRUAR RecName: Full=WAT1-related protein {ECO:0000256|RuleBase:RU363077};	--	GO:0016021,integral component of membrane; GO:0000325,plant-type vacuole; GO:0009705,plant-type vacuole membrane; GO:0005886,plasma membrane; GO:0022857,transmembrane transporter activity; GO:0009851,auxin biosynthetic process; GO:0010315,auxin efflux; GO:0009734,auxin-activated signaling pathway; GO:0071555,cell wall organization; GO:0006952,defense response; GO:0009834,plant-type secondary cell…	PF00892.23:EamA-like transporter family	--	--	--
PmuVar_Chr1_3693	116.02	107.21	105.339	592.057	529.569	624.333	2464	2589	2508	14721	10999	13070	2.71341	7.43925e-245	1.57539e-242	up	Chr1	28272447	28274955	-	PmuVar_Chr1_3693	--	--	--	hypothetical protein GBA52_020916 [Prunus armeniaca]	HIP3_ARATH RecName: Full=Heavy metal-associated isoprenylated plant protein 3 {ECO:0000303|PubMed:21072340, ECO:0000303|PubMed:23368984}; Short=AtHIP03 {ECO:0000303|PubMed:21072340, ECO:0000303|PubMed:23368984}; Short=AtHIPP3 {ECO:0000303|PubMed:21072340, ECO:0000303|PubMed:23368984}; Flags: Precursor;	A0A5E4FSR3_PRUDU SubName: Full=PREDICTED: heavy metal-associated {ECO:0000313|EMBL:VVA30566.1};	Copper chaperone	GO:0005737,cytoplasm; GO:0005730,nucleolus; GO:0005634,nucleus; GO:0008270,zinc ion binding; GO:0009910,negative regulation of flower development; GO:0003674,molecular_function; GO:0005488,binding; GO:0043167,ion binding; GO:0043169,cation binding; GO:0046872,metal ion binding; GO:0046914,transition metal ion binding; GO:0000003,reproduction; GO:0003006,developmental process involved in reproduct…	PF00403.29:Heavy-metal-associated domain	--	--	--
PmuVar_Chr7_0525	216.581	200.944	211.686	845.043	795.28	801.214	2037	2149	2232	9305	7315	7428	2.25905	6.52263e-244	1.36261e-241	up	Chr7	4571055	4571519	+	PmuVar_Chr7_0525	--	--	--	PREDICTED: uncharacterized protein LOC103337838 [Prunus mume]	--	A0A6J5UUN1_PRUAR SubName: Full=Uncharacterized protein {ECO:0000313|EMBL:CAB4280280.1};	--	--	PF04398.15:Protein of unknown function, DUF538	--	--	--
PmuVar_Chr2_1280	87.7018	85.2686	85.4762	9.8955	10.2289	8.1535	4103	4536	4483	542	468	376	-2.88978	6.41132e-243	1.3215e-240	down	Chr2	10123767	10129241	+	PmuVar_Chr2_1280	--	--	--	unnamed protein product [Prunus armeniaca]	BSPA_POPDE RecName: Full=Bark storage protein A; Flags: Precursor;	A0A6J5TU49_PRUAR SubName: Full=Uncharacterized protein {ECO:0000313|EMBL:CAB4266495.1};	--	GO:0003824,catalytic activity; GO:0045735,nutrient reservoir activity; GO:0009116,nucleoside metabolic process; GO:0003674,molecular_function; GO:0006139,nucleobase-containing compound metabolic process; GO:0006725,cellular aromatic compound metabolic process; GO:0006807,nitrogen compound metabolic process; GO:0008150,biological_process; GO:0008152,metabolic process; GO:0009987,cellular process; …	PF01048.23:Phosphorylase superfamily	--	--	--
PmuVar_Chr2_0878	78.4565	74.9398	82.4201	309.482	314.667	337.865	2009	2182	2366	9278	7880	8528	2.33125	2.32017e-242	4.71942e-240	up	Chr2	7326390	7329196	+	PmuVar_Chr2_0878	--	K00924 kinase [EC:2.7.1.-] | (RefSeq) aspartic proteinase-like protein 2 (A)	--	PREDICTED: aspartic proteinase Asp1-like isoform X2 [Prunus mume]	ASP1_ORYSJ RecName: Full=Aspartic proteinase Asp1; Short=OSAP1; Short=OsAsp1; EC=3.4.23.-; AltName: Full=Nucellin-like protein; Flags: Precursor;	A0A5E4ECZ6_PRUDU SubName: Full=PREDICTED: aspartic ase Asp1 {ECO:0000313|EMBL:VVA13555.1};	Aspartyl protease	GO:0004190,aspartic-type endopeptidase activity; GO:0006508,proteolysis; GO:0003674,molecular_function; GO:0003824,catalytic activity; GO:0004175,endopeptidase activity; GO:0008233,peptidase activity; GO:0016787,hydrolase activity; GO:0070001,aspartic-type peptidase activity; GO:0140096,catalytic activity, acting on a protein; GO:0006807,nitrogen compound metabolic process; GO:0008150,biological_…	PF14543.9:Xylanase inhibitor N-terminal	--	--	--
PmuVar_Chr2_2345	37.9588	40.2595	41.4526	185.277	199.839	174.72	767	925	939	4383	3949	3480	2.52641	4.52534e-240	9.08535e-238	up	Chr2	16596164	16598599	+	PmuVar_Chr2_2345	--	K14379 tartrate-resistant acid phosphatase type 5 [EC:3.1.3.2] | (RefSeq) LOW QUALITY PROTEIN: purple acid phosphatase 3-like (A)	ko00740: Riboflavin metabolism; ko01100: Metabolic pathways	unnamed protein product [Prunus armeniaca]	PPA3_ARATH RecName: Full=Purple acid phosphatase 3; EC=3.1.3.2; Flags: Precursor;	A0A6J5W7M4_PRUAR RecName: Full=Purple acid phosphatase {ECO:0000256|PIRNR:PIRNR000898}; EC=3.1.3.2 {ECO:0000256|PIRNR:PIRNR000898};	Purple (tartrate-resistant) acid phosphatase	GO:0005576,extracellular region; GO:0000325,plant-type vacuole; GO:0003993,acid phosphatase activity; GO:0008199,ferric iron binding; GO:0008198,ferrous iron binding; GO:0003674,molecular_function; GO:0003824,catalytic activity; GO:0016787,hydrolase activity; GO:0016788,hydrolase activity, acting on ester bonds; GO:0016791,phosphatase activity; GO:0042578,phosphoric ester hydrolase activity; GO:0…	PF00149.31:Calcineurin-like phosphoesterase	--	--	--
PmuVar_Chr2_5373	6.8238	7.0202	8.4413	91.3322	89.1943	93.2603	106	124	147	1661	1355	1428	3.91973	9.92164e-240	1.96639e-237	up	Chr2	40677427	40678569	-	PmuVar_Chr2_5373	--	K12462 Rho GDP-dissociation inhibitor | (RefSeq) rho GDP-dissociation inhibitor 1-like (A)	--	PREDICTED: rho GDP-dissociation inhibitor 1-like [Prunus mume]	GDIR_ARATH RecName: Full=Rho GDP-dissociation inhibitor 1; Short=AtRhoGDI1; Short=Rho GDI-1;	A0A6J5W2A0_PRUAR SubName: Full=Uncharacterized protein {ECO:0000313|EMBL:CAB4294132.1};	Rho GDP-dissociation inhibitor	GO:0005829,cytosol; GO:0016020,membrane; GO:0005096,GTPase activator activity; GO:0005094,Rho GDP-dissociation inhibitor activity; GO:0009932,cell tip growth; GO:0007266,Rho protein signal transduction; GO:0010053,root epidermal cell differentiation; GO:0003674,molecular_function; GO:0008047,enzyme activator activity; GO:0030234,enzyme regulator activity; GO:0030695,GTPase regulator activity; GO:…	PF02115.20:RHO protein GDP dissociation inhibitor	--	--	--
PmuVar_Chr4_3078	35.1195	34.2184	36.9084	218.035	232.091	182.299	797	883	939	5793	5151	4078	2.87406	6.07428e-239	1.18864e-236	up	Chr4	23972970	23974717	+	PmuVar_Chr4_3078	--	K00083 cinnamyl-alcohol dehydrogenase [EC:1.1.1.195] | (RefSeq) probable cinnamyl alcohol dehydrogenase 1 (A)	ko00940: Phenylpropanoid biosynthesis; ko01100: Metabolic pathways; ko01110: Biosynthesis of secondary metabolites	hypothetical protein GBA52_011084 [Prunus armeniaca]	CADH1_ARATH RecName: Full=Probable cinnamyl alcohol dehydrogenase 1; Short=AtCAD1; EC=1.1.1.195;	A0A6J5WTC0_PRUAR RecName: Full=PKS_ER domain-containing protein {ECO:0000259|SMART:SM00829};	Alcohol dehydrogenase, class V	GO:0005829,cytosol; GO:0045551,cinnamyl-alcohol dehydrogenase activity; GO:0016616,oxidoreductase activity, acting on the CH-OH group of donors, NAD or NADP as acceptor; GO:0052747,sinapyl alcohol dehydrogenase activity; GO:0008270,zinc ion binding; GO:0009809,lignin biosynthetic process; GO:0003674,molecular_function; GO:0003824,catalytic activity; GO:0016491,oxidoreductase activity; GO:0016614,…	PF08240.15:Alcohol dehydrogenase GroES-like domain	--	--	--
PmuVar_Chr7_1495	7.4385	7.5005	5.9202	62.55	61.5374	62.3219	232	266	207	2284	1877	1916	3.46282	1.45661e-238	2.81471e-236	up	Chr7	10324453	10327188	-	PmuVar_Chr7_1495	--	K05350 beta-glucosidase [EC:3.2.1.21] | (RefSeq) beta-glucosidase 44-like (A)	ko00460: Cyanoamino acid metabolism; ko00500: Starch and sucrose metabolism; ko00999: Biosynthesis of various plant secondary metabolites; ko01100: Metabolic pathways; ko01110: Biosynthesis of secondary metabolites	PREDICTED: beta-glucosidase 44-like [Prunus mume]	BGL44_ARATH RecName: Full=Beta-glucosidase 44; Short=AtBGLU44; EC=3.2.1.21; Flags: Precursor;	A0A6J5UXL4_PRUAR SubName: Full=Uncharacterized protein {ECO:0000313|EMBL:CAB4281370.1};	Beta-glucosidase, lactase phlorizinhydrolase, and related proteins	GO:0022626,cytosolic ribosome; GO:0005576,extracellular region; GO:0009505,plant-type cell wall; GO:0080081,4-methylumbelliferyl-beta-D-glucopyranoside beta-glucosidase activity; GO:0047668,amygdalin beta-glucosidase activity; GO:0080083,beta-gentiobiose beta-glucosidase activity; GO:0008422,beta-glucosidase activity; GO:0004567,beta-mannosidase activity; GO:0080079,cellobiose glucosidase activit…	PF00232.21:Glycosyl hydrolase family 1	--	--	--
PmuVar_Chr3_1330	1.2796	1.8756	2.0408	51.2384	61.2204	66.443	33	55	59	1547	1544	1689	5.3973	4.06907e-238	7.76589e-236	up	Chr3	8934494	8936597	-	PmuVar_Chr3_1330	--	K01246 DNA-3-methyladenine glycosylase I [EC:3.2.2.20] | (RefSeq) uncharacterized protein LOC103325571 (A)	ko03410: Base excision repair	PREDICTED: uncharacterized protein LOC103325571 [Prunus mume]	--	A0A6P5SVV9_PRUAV SubName: Full=uncharacterized protein LOC110760321 {ECO:0000313|RefSeq:XP_021818262.1};	--	GO:0008725,DNA-3-methyladenine glycosylase activity; GO:0006284,base-excision repair; GO:0003674,molecular_function; GO:0003824,catalytic activity; GO:0003905,alkylbase DNA N-glycosylase activity; GO:0016787,hydrolase activity; GO:0016798,hydrolase activity, acting on glycosyl bonds; GO:0016799,hydrolase activity, hydrolyzing N-glycosyl compounds; GO:0019104,DNA N-glycosylase activity; GO:0043733…	PF03352.16:Methyladenine glycosylase	--	--	--
PmuVar_Chr1_2980	370.029	363.45	380.679	1263.32	1171.42	1231.74	13135	14670	15149	52502	40666	43099	2.02138	5.09725e-238	9.60956e-236	up	Chr1	23240163	23242333	+	PmuVar_Chr1_2980	--	--	--	PREDICTED: root phototropism protein 2 isoform X1 [Prunus mume]	RPT2_ARATH RecName: Full=Root phototropism protein 2; AltName: Full=BTB/POZ domain-containing protein RPT2;	A0A6J5V2B5_PRUAR SubName: Full=Uncharacterized protein {ECO:0000313|EMBL:CAB4282017.1};	--	GO:0005737,cytoplasm; GO:0005634,nucleus; GO:0005777,peroxisome; GO:0009904,chloroplast accumulation movement; GO:0009638,phototropism; GO:0016567,protein ubiquitination; GO:0007165,signal transduction; GO:0006996,organelle organization; GO:0008150,biological_process; GO:0009657,plastid organization; GO:0009658,chloroplast organization; GO:0009902,chloroplast relocation; GO:0009987,cellular proce…	PF03000.17:NPH3 family	--	--	--
PmuVar_Chr4_1101	14.9271	15.9352	17.2403	138.112	138.782	132.613	173	210	224	1874	1573	1515	3.3902	5.77374e-238	1.07538e-235	up	Chr4	10537861	10540932	-	PmuVar_Chr4_1101	--	K14484 auxin-responsive protein IAA | (RefSeq) auxin-induced protein IAA6 (A)	ko04075: Plant hormone signal transduction	PREDICTED: auxin-induced protein IAA6 [Prunus mume]	AUX22_SOYBN RecName: Full=Auxin-induced protein AUX22;	A0A6J5WN43_PRUAR RecName: Full=Auxin-responsive protein {ECO:0000256|RuleBase:RU004549};	--	GO:0005634,nucleus; GO:0009734,auxin-activated signaling pathway; GO:0006355,regulation of transcription, DNA-templated; GO:0007154,cell communication; GO:0007165,signal transduction; GO:0008150,biological_process; GO:0009719,response to endogenous stimulus; GO:0009725,response to hormone; GO:0009733,response to auxin; GO:0009755,hormone-mediated signaling pathway; GO:0009987,cellular process; GO…	PF02309.19:AUX/IAA family	AUX/IAA	TR	AUX/IAA
PmuVar_Chr8_0592	89.6754	85.0295	91.5298	7.6596	9.8728	8.6681	3390	3655	3879	339	365	323	-3.04787	2.50512e-237	4.61032e-235	down	Chr8	3274821	3279867	+	PmuVar_Chr8_0592	--	K12355 coniferyl-aldehyde dehydrogenase [EC:1.2.1.68] | (RefSeq) aldehyde dehydrogenase family 2 member C4 (A)	ko00940: Phenylpropanoid biosynthesis; ko01110: Biosynthesis of secondary metabolites	PREDICTED: aldehyde dehydrogenase family 2 member C4 [Prunus mume]	AL2C4_ARATH RecName: Full=Aldehyde dehydrogenase family 2 member C4; EC=1.2.1.3; AltName: Full=ALDH1a; AltName: Full=Protein REDUCED EPIDERMAL FLUORESCENCE 1;	A0A6J5VKB4_PRUAR RecName: Full=Aldedh domain-containing protein {ECO:0000259|Pfam:PF00171};	Aldehyde dehydrogenase	GO:0005829,cytosol; GO:0004029,aldehyde dehydrogenase (NAD+) activity; GO:0050269,coniferyl-aldehyde dehydrogenase activity; GO:0043878,glyceraldehyde-3-phosphate dehydrogenase (NAD+) (non-phosphorylating) activity; GO:0009699,phenylpropanoid biosynthetic process; GO:0003674,molecular_function; GO:0003824,catalytic activity; GO:0004030,aldehyde dehydrogenase [NAD(P)+] activity; GO:0016491,oxidore…	PF00171.25:Aldehyde dehydrogenase family	--	--	--
PmuVar_Chr7_0227	0.1239	0.4086	0.3869	122.164	106.43	136.58	4	15	14	4617	3360	4346	8.90693	3.08686e-237	5.6141e-235	up	Chr7	2131841	2133436	-	PmuVar_Chr7_0227	--	K15398 fatty acid omega-hydroxylase [EC:1.14.-.-] | (RefSeq) cytochrome P450 86A22 (A)	ko00073: Cutin, suberine and wax biosynthesis; ko01100: Metabolic pathways	PREDICTED: cytochrome P450 86A22 [Prunus mume]	86A22_PETHY RecName: Full=Cytochrome P450 86A22 {ECO:0000303|PubMed:19940120}; EC=1.14.14.129 {ECO:0000269|PubMed:19940120}; AltName: Full=Long-chain acyl-CoA omega-monooxygenase {ECO:0000305};	A0A6J5UV99_PRUAR SubName: Full=Uncharacterized protein {ECO:0000313|EMBL:CAB4279942.1};	Cytochrome P450 CYP4/CYP19/CYP26 subfamilies	GO:0016021,integral component of membrane; GO:0020037,heme binding; GO:0005506,iron ion binding; GO:0016709,oxidoreductase activity, acting on paired donors, with incorporation or reduction of molecular oxygen, NAD(P)H as one donor, and incorporation of one atom of oxygen; GO:0035336,long-chain fatty-acyl-CoA metabolic process; GO:0003674,molecular_function; GO:0005488,binding; GO:0046906,tetrapy…	PF00067.25:Cytochrome P450	--	--	--
PmuVar_Chr6_3031	12.4324	13.0949	13.282	178.302	177.827	172.616	86	103	103	1444	1203	1177	4.06902	1.55366e-233	2.79279e-231	up	Chr6	23734237	23735854	-	PmuVar_Chr6_3031	--	--	--	PREDICTED: gibberellin-regulated protein 9 [Prunus mume]	GASA9_ARATH RecName: Full=Gibberellin-regulated protein 9; AltName: Full=GAST1 protein homolog 9; Flags: Precursor;	A0A6J5VK89_PRUAR SubName: Full=Uncharacterized protein {ECO:0000313|EMBL:CAB4289520.1};	--	GO:0005576,extracellular region; GO:0009740,gibberellic acid mediated signaling pathway; GO:0007154,cell communication; GO:0007165,signal transduction; GO:0008150,biological_process; GO:0009719,response to endogenous stimulus; GO:0009725,response to hormone; GO:0009739,response to gibberellin; GO:0009755,hormone-mediated signaling pathway; GO:0009987,cellular process; GO:0010033,response to organ…	PF02704.17:Gibberellin regulated protein	--	--	--
PmuVar_Chr5_3221	108.501	118.492	114.281	11.1696	13.7004	10.412	4049	5028	4781	488	500	383	-2.97529	5.23912e-233	9.30937e-231	down	Chr5	28422673	28424517	+	PmuVar_Chr5_3221	--	--	--	PREDICTED: pentatricopeptide repeat-containing protein At2g29760, chloroplastic-like [Prunus mume]	PP169_ARATH RecName: Full=Pentatricopeptide repeat-containing protein At2g22410, mitochondrial; Flags: Precursor;	A0A6J5WJR3_PRUAR SubName: Full=Uncharacterized protein {ECO:0000313|EMBL:CAB4301789.1};	FOG: PPR repeat	GO:0009507,chloroplast; GO:0005739,mitochondrion; GO:1900865,chloroplast RNA modification; GO:0006139,nucleobase-containing compound metabolic process; GO:0006725,cellular aromatic compound metabolic process; GO:0006807,nitrogen compound metabolic process; GO:0008150,biological_process; GO:0008152,metabolic process; GO:0009451,RNA modification; GO:0009987,cellular process; GO:0016070,RNA metaboli…	PF01535.23:PPR repeat	--	--	--
PmuVar_Chr2_1252	368.343	383.341	339.681	1386.55	1345.81	1417.86	8158	9654	8434	35953	29150	30954	2.22904	1.20583e-231	2.11828e-229	up	Chr2	9952729	9954665	-	PmuVar_Chr2_1252	--	--	--	PREDICTED: BURP domain protein RD22-like [Prunus mume]	RD22_ARATH RecName: Full=BURP domain protein RD22 {ECO:0000303|PubMed:9790599}; AltName: Full=Dehydration-responsive protein RD22 {ECO:0000303|PubMed:8479424}; Flags: Precursor;	A0A251RFK3_PRUPE RecName: Full=BURP domain-containing protein {ECO:0000259|PROSITE:PS51277};	--	GO:0005768,endosome; GO:0005794,Golgi apparatus; GO:0005802,trans-Golgi network; GO:0003729,mRNA binding; GO:0009651,response to salt stress; GO:0003674,molecular_function; GO:0003676,nucleic acid binding; GO:0003723,RNA binding; GO:0005488,binding; GO:0097159,organic cyclic compound binding; GO:1901363,heterocyclic compound binding; GO:0006950,response to stress; GO:0006970,response to osmotic s…	PF03181.18:BURP domain	--	--	--
PmuVar_Chr2_3415	26.9528	25.2028	27.5905	179.111	155.731	191.156	664	706	762	5166	3752	4642	3.02621	1.85884e-229	3.22875e-227	up	Chr2	23884139	23885682	-	PmuVar_Chr2_3415	--	--	--	hypothetical protein GBA52_003404 [Prunus armeniaca]	FB76_ARATH RecName: Full=F-box protein At1g67340;	A0A6J5TJS2_PRUAR RecName: Full=MYND-type domain-containing protein {ECO:0000259|PROSITE:PS50865};	--	GO:0005634,nucleus; GO:0046872,metal ion binding; GO:0016567,protein ubiquitination; GO:0003674,molecular_function; GO:0005488,binding; GO:0043167,ion binding; GO:0043169,cation binding; GO:0006464,cellular protein modification process; GO:0006807,nitrogen compound metabolic process; GO:0008150,biological_process; GO:0008152,metabolic process; GO:0009987,cellular process; GO:0019538,protein metab…	PF01753.21:MYND finger	--	--	--
PmuVar_Chr5_3137	17.2875	17.3088	14.9239	131.753	111.584	138.157	621	707	601	5541	3920	4892	3.24965	2.09633e-229	3.6008e-227	up	Chr5	27941590	27945123	+	PmuVar_Chr5_3137	--	K01193 beta-fructofuranosidase [EC:3.2.1.26] | (RefSeq) beta-fructofuranosidase, soluble isoenzyme I-like (A)	ko00052: Galactose metabolism; ko00500: Starch and sucrose metabolism; ko01100: Metabolic pathways; ko01110: Biosynthesis of secondary metabolites	PREDICTED: beta-fructofuranosidase, soluble isoenzyme I-like [Prunus mume]	RHVI1_ROSHC RecName: Full=Acid beta-fructofuranosidase 1, vacuolar {ECO:0000305}; EC=3.2.1.26 {ECO:0000269|PubMed:22505690}; AltName: Full=Vacuolar invertase 1 {ECO:0000303|PubMed:22505690}; Short=RvVI1 {ECO:0000303|PubMed:22505690}; Flags: Precursor;	A0A6J5WJ21_PRUAR RecName: Full=Beta-fructofuranosidase {ECO:0000256|ARBA:ARBA00012758}; EC=3.2.1.26 {ECO:0000256|ARBA:ARBA00012758};	Beta-fructofuranosidase (invertase)	GO:0016021,integral component of membrane; GO:0005775,vacuolar lumen; GO:0004564,beta-fructofuranosidase activity; GO:0005975,carbohydrate metabolic process; GO:0003674,molecular_function; GO:0003824,catalytic activity; GO:0004553,hydrolase activity, hydrolyzing O-glycosyl compounds; GO:0016787,hydrolase activity; GO:0016798,hydrolase activity, acting on glycosyl bonds; GO:0008150,biological_proc…	PF00251.23:Glycosyl hydrolases family 32 N-terminal domain	--	--	--
PmuVar_Chr7_2482	1003.79	1023.05	964.782	4868.79	4602.69	3914.92	8710	10094	9385	49461	39058	33485	2.46269	2.53315e-227	4.30329e-225	up	Chr7	18635890	18636318	+	PmuVar_Chr7_2482	--	--	--	PREDICTED: 14 kDa proline-rich protein DC2.15-like [Prunus mume]	14KD_DAUCA RecName: Full=14 kDa proline-rich protein DC2.15; Flags: Precursor;	A0A251P524_PRUPE RecName: Full=AAI domain-containing protein {ECO:0000259|SMART:SM00499};	--	GO:0016021,integral component of membrane; GO:0005575,cellular_component; GO:0016020,membrane; GO:0031224,intrinsic component of membrane; GO:0110165,cellular anatomical entity	PF14547.9:Hydrophobic seed protein	--	--	--
PmuVar_Chr4_2228	184.185	183.833	190.268	726.871	668.383	663.56	2157	2448	2498	9966	7655	7660	2.18541	4.82503e-227	8.10762e-225	up	Chr4	18593027	18593695	+	PmuVar_Chr4_2228	--	--	--	hypothetical protein GBA52_011955 [Prunus armeniaca]	SAP12_ARATH RecName: Full=Zinc finger AN1 domain-containing stress-associated protein 12; Short=AtSAP12;	M5X0H0_PRUPE SubName: Full=Uncharacterized protein {ECO:0000313|EMBL:EMJ18966.1};	Predicted Zn-finger protein	GO:0005737,cytoplasm; GO:0008270,zinc ion binding; GO:0009737,response to abscisic acid; GO:0003674,molecular_function; GO:0005488,binding; GO:0043167,ion binding; GO:0043169,cation binding; GO:0046872,metal ion binding; GO:0046914,transition metal ion binding; GO:0008150,biological_process; GO:0009719,response to endogenous stimulus; GO:0009725,response to hormone; GO:0010033,response to organic…	PF01428.19:AN1-like Zinc finger	--	--	--
PmuVar_Chr2_0803	1.0791	1.1646	1.7501	69.1256	61.6884	63.4424	22	27	40	1650	1230	1275	5.90035	7.01494e-226	1.16606e-223	up	Chr2	6861953	6864346	-	PmuVar_Chr2_0803	--	K05278 flavonol synthase [EC:1.14.20.6] | (RefSeq) flavonol synthase/flavanone 3-hydroxylase-like (A)	ko00941: Flavonoid biosynthesis; ko01100: Metabolic pathways; ko01110: Biosynthesis of secondary metabolites	PREDICTED: flavonol synthase/flavanone 3-hydroxylase-like [Prunus mume]	FLS_MALDO RecName: Full=Flavonol synthase/flavanone 3-hydroxylase; Short=FLS; EC=1.14.11.9 {ECO:0000250|UniProtKB:Q7XZQ6}; EC=1.14.20.6 {ECO:0000250|UniProtKB:Q7XZQ6};	A0A6J5TTC0_PRUAR RecName: Full=Fe2OG dioxygenase domain-containing protein {ECO:0000259|PROSITE:PS51471};	Iron/ascorbate family oxidoreductases	GO:0005737,cytoplasm; GO:0045431,flavonol synthase activity; GO:0031418,L-ascorbic acid binding; GO:0046872,metal ion binding; GO:0045486,naringenin 3-dioxygenase activity; GO:0003674,molecular_function; GO:0003824,catalytic activity; GO:0016491,oxidoreductase activity; GO:0016705,oxidoreductase activity, acting on paired donors, with incorporation or reduction of molecular oxygen; GO:0016706,2-o…	PF03171.23:2OG-Fe(II) oxygenase superfamily	--	--	--
PmuVar_Chr5_0474	39.6996	34.316	40.4641	238.671	226.771	270.261	701	689	801	4934	3916	4704	2.98855	2.5244e-224	4.15156e-222	up	Chr5	5116632	5118360	+	PmuVar_Chr5_0474	--	--	--	PREDICTED: heavy metal-associated isoprenylated plant protein 3-like [Prunus mume]	HIP3_ARATH RecName: Full=Heavy metal-associated isoprenylated plant protein 3 {ECO:0000303|PubMed:21072340, ECO:0000303|PubMed:23368984}; Short=AtHIP03 {ECO:0000303|PubMed:21072340, ECO:0000303|PubMed:23368984}; Short=AtHIPP3 {ECO:0000303|PubMed:21072340, ECO:0000303|PubMed:23368984}; Flags: Precursor;	A0A5E4GL36_PRUDU SubName: Full=PREDICTED: heavy {ECO:0000313|EMBL:VVA40291.1};	Copper chaperone	GO:0005737,cytoplasm; GO:0005730,nucleolus; GO:0005634,nucleus; GO:0008270,zinc ion binding; GO:0009910,negative regulation of flower development; GO:0003674,molecular_function; GO:0005488,binding; GO:0043167,ion binding; GO:0043169,cation binding; GO:0046872,metal ion binding; GO:0046914,transition metal ion binding; GO:0000003,reproduction; GO:0003006,developmental process involved in reproduct…	PF00403.29:Heavy-metal-associated domain	--	--	--
PmuVar_Chr4_1553	52.9159	49.6177	51.2516	208.705	203.02	228.691	1888	2013	2050	8718	7084	8043	2.36133	2.63066e-219	4.28077e-217	up	Chr4	14075717	14079674	-	PmuVar_Chr4_1553	--	K01051 pectinesterase [EC:3.1.1.11] | (RefSeq) pectinesterase (A)	ko00040: Pentose and glucuronate interconversions; ko01100: Metabolic pathways	PREDICTED: pectinesterase [Prunus mume]	PME1_CITSI RecName: Full=Pectinesterase 1; Short=PE 1; EC=3.1.1.11; AltName: Full=Pectin methylesterase; Flags: Precursor;	M5XA26_PRUPE RecName: Full=Pectinesterase {ECO:0000256|RuleBase:RU000589}; EC=3.1.1.11 {ECO:0000256|RuleBase:RU000589};	--	GO:0005576,extracellular region; GO:0045330,aspartyl esterase activity; GO:0004857,enzyme inhibitor activity; GO:0030599,pectinesterase activity; GO:0042545,cell wall modification; GO:0045490,pectin catabolic process; GO:0003674,molecular_function; GO:0003824,catalytic activity; GO:0016787,hydrolase activity; GO:0016788,hydrolase activity, acting on ester bonds; GO:0030234,enzyme regulator activi…	PF01095.22:Pectinesterase	--	--	--
PmuVar_Chr5_3421	4.1544	2.5363	3.4607	47.5668	50.4842	54.3714	121	84	113	1622	1438	1561	4.21828	7.83925e-213	1.26236e-210	up	Chr5	29487217	29489533	-	PmuVar_Chr5_3421	--	--	--	PREDICTED: protein IQ-DOMAIN 1 [Prunus mume]	IQD21_ARATH RecName: Full=Protein IQ-DOMAIN 21 {ECO:0000303|PubMed:16368012}; Short=AtIQD21 {ECO:0000303|PubMed:16368012}; AltName: Full=Protein GROWTH CONTROLLED BY ABSCISIC ACID 2 {ECO:0000303|PubMed:11429606}; AltName: Full=Protein GUARD CELL ASSOCIATED 2 {ECO:0000303|PubMed:10963598};	A0A6J5WUG9_PRUAR RecName: Full=DUF4005 domain-containing protein {ECO:0000259|Pfam:PF13178};	--	GO:0005737,cytoplasm; GO:0005856,cytoskeleton; GO:0005634,nucleus; GO:0005886,plasma membrane; GO:0005516,calmodulin binding; GO:0009738,abscisic acid-activated signaling pathway; GO:0055074,calcium ion homeostasis; GO:0019722,calcium-mediated signaling; GO:0071244,cellular response to carbon dioxide; GO:0090333,regulation of stomatal closure; GO:0009737,response to abscisic acid; GO:0009409,resp…	PF00612.30:IQ calmodulin-binding motif	--	--	--
PmuVar_Chr8_1527	142.409	141.1	135.6	16.7908	19.1185	14.8821	3854	4342	4114	532	506	397	-2.74464	4.05851e-212	6.4681e-210	down	Chr8	8979715	8981052	-	PmuVar_Chr8_1527	--	K19747 BAHD acyltransferase [EC:2.3.1.-] | (RefSeq) BAHD acyltransferase DCR (A)	--	PREDICTED: uncharacterized acetyltransferase At3g50280-like [Prunus mume]	Y3028_ARATH RecName: Full=Uncharacterized acetyltransferase At3g50280; EC=2.3.1.-;	A0A6J5VIA6_PRUAR SubName: Full=Uncharacterized protein {ECO:0000313|EMBL:CAB4287387.1};	--	GO:0016746,transferase activity, transferring acyl groups; GO:0003674,molecular_function; GO:0003824,catalytic activity; GO:0016740,transferase activity	PF02458.18:Transferase family	--	--	--
PmuVar_Chr7_0304	38.8683	38.6947	39.7097	255.236	205.026	237.588	750	849	859	5766	3869	4519	2.87735	5.12639e-212	8.08662e-210	up	Chr7	2687965	2688918	-	PmuVar_Chr7_0304	--	K18368 caffeoylshikimate esterase [EC:3.1.1.-] | (RefSeq) caffeoylshikimate esterase (A)	ko00940: Phenylpropanoid biosynthesis; ko01100: Metabolic pathways; ko01110: Biosynthesis of secondary metabolites	unnamed protein product [Prunus armeniaca]	CSE_ARATH RecName: Full=Caffeoylshikimate esterase; EC=3.1.1.-; AltName: Full=Lysophospholipase 2; Short=LysoPL2;	A0A6J5XEZ0_PRUAR RecName: Full=Hydrolase_4 domain-containing protein {ECO:0000259|Pfam:PF12146};	Lysophospholipase	GO:0005783,endoplasmic reticulum; GO:0005794,Golgi apparatus; GO:0016020,membrane; GO:0005634,nucleus; GO:0005886,plasma membrane; GO:0009506,plasmodesma; GO:0003846,2-acylglycerol O-acyltransferase activity; GO:0090430,caffeoyl-CoA: alcohol caffeoyl transferase activity; GO:0016787,hydrolase activity; GO:0016298,lipase activity; GO:0004622,lysophospholipase activity; GO:0009809,lignin biosynthet…	PF12146.11:Serine aminopeptidase, S33	--	--	--
PmuVar_Chr2_2065	4.7796	4.8592	5.7642	36.0404	43.849	43.5235	250	289	338	2207	2243	2244	3.30246	2.76817e-209	4.32254e-207	up	Chr2	14795744	14804204	+	PmuVar_Chr2_2065	--	--	--	PREDICTED: subtilisin-like protease SBT1.9 [Prunus mume]	SBT3_SOLLC RecName: Full=Subtilisin-like protease SBT3 {ECO:0000303|PubMed:27259555}; EC=3.4.21.- {ECO:0000269|PubMed:19332543, ECO:0000269|PubMed:19407393, ECO:0000269|PubMed:19805099, ECO:0000269|PubMed:27259555, ECO:0000269|PubMed:27451395}; AltName: Full=LeSBT3 {ECO:0000303|PubMed:10350089}; AltName: Full=SlSBT3 {ECO:0000303|PubMed:19332543}; AltName: Full=Subtilase 3 {ECO:0000303|PubMed:1933…	A0A6J5TR55_PRUAR SubName: Full=Uncharacterized protein {ECO:0000313|EMBL:CAB4266343.1};	--	GO:0005615,extracellular space; GO:0042802,identical protein binding; GO:0042803,protein homodimerization activity; GO:0004252,serine-type endopeptidase activity; GO:0008236,serine-type peptidase activity; GO:0006952,defense response; GO:0043171,peptide catabolic process; GO:0009827,plant-type cell wall modification; GO:1900367,positive regulation of defense response to insect; GO:0010628,positiv…	PF00082.25:Subtilase family	--	--	--
PmuVar_Chr6_2900	0.5605	1.0845	1.15	103.754	81.6207	105.204	10	22	23	2167	1424	1850	6.98623	4.40439e-208	6.80874e-206	up	Chr6	22007399	22008280	-	PmuVar_Chr6_2900	--	--	--	unnamed protein product [Prunus armeniaca]	EXOL2_ARATH RecName: Full=Protein EXORDIUM-like 2; Flags: Precursor;	A0A6J5VPD8_PRUAR SubName: Full=Uncharacterized protein {ECO:0000313|EMBL:CAB4289714.1};	--	GO:0048046,apoplast; GO:0005615,extracellular space; GO:0005794,Golgi apparatus; GO:0009505,plant-type cell wall; GO:0009506,plasmodesma; GO:0009536,plastid; GO:0071456,cellular response to hypoxia; GO:0001666,response to hypoxia; GO:0006950,response to stress; GO:0008150,biological_process; GO:0009628,response to abiotic stimulus; GO:0009987,cellular process; GO:0033554,cellular response to stre…	PF04674.15:Phosphate-induced protein 1 conserved region	--	--	--
PmuVar_Chr8_0174	259.876	268.018	270.998	782.421	752.477	742.29	5188	6084	6065	18287	14691	14607	1.81342	1.75077e-204	2.67971e-202	up	Chr8	1115392	1117153	-	PmuVar_Chr8_0174	--	--	--	PREDICTED: uncharacterized protein LOC103341353 [Prunus mume]	LEA14_SOYBN RecName: Full=Desiccation protectant protein Lea14 homolog;	M5VR04_PRUPE SubName: Full=Uncharacterized protein {ECO:0000313|EMBL:EMJ03421.1};	--	GO:0009269,response to desiccation; GO:0001101,response to acid chemical; GO:0006950,response to stress; GO:0008150,biological_process; GO:0009414,response to water deprivation; GO:0009415,response to water; GO:0009628,response to abiotic stimulus; GO:0010035,response to inorganic substance; GO:0042221,response to chemical; GO:0050896,response to stimulus; GO:1901700,response to oxygen-containing…	PF03168.16:Late embryogenesis abundant protein	--	--	--
PmuVar_Chr3_1486	77.2277	79.8762	76.6006	7.2907	8.3879	7.4598	2090	2458	2324	231	222	199	-3.03739	6.05513e-203	9.17708e-201	down	Chr3	10335224	10336561	-	PmuVar_Chr3_1486	--	K13065 shikimate O-hydroxycinnamoyltransferase [EC:2.3.1.133] | (RefSeq) BAHD acyltransferase At5g47980-like (A)	ko00940: Phenylpropanoid biosynthesis; ko00941: Flavonoid biosynthesis; ko00945: Stilbenoid, diarylheptanoid and gingerol biosynthesis; ko01100: Metabolic pathways; ko01110: Biosynthesis of secondary metabolites	BAHD acyltransferase At5g47980-like [Prunus dulcis]	BAHD1_ARATH RecName: Full=BAHD acyltransferase At5g47980; EC=2.3.1.-;	A0A6P5U242_PRUAV SubName: Full=BAHD acyltransferase At5g47980-like {ECO:0000313|RefSeq:XP_021834178.1};	--	GO:0016746,transferase activity, transferring acyl groups; GO:0003674,molecular_function; GO:0003824,catalytic activity; GO:0016740,transferase activity	PF02458.18:Transferase family	--	--	--
PmuVar_Chr8_1962	8.4581	7.8218	9.9948	79.7667	69.6795	75.3237	194	204	257	2142	1563	1703	3.40063	1.71814e-202	2.57872e-200	up	Chr8	12435359	12437415	+	PmuVar_Chr8_1962	--	K10355 actin, other eukaryote | (RefSeq) actin-like (A)	--	actin [Prunus persica]	ACT_GOSHI RecName: Full=Actin;	M5VWV3_PRUPE SubName: Full=Uncharacterized protein {ECO:0000313|EMBL:EMJ05561.1};	Actin and related proteins	GO:0005737,cytoplasm; GO:0005856,cytoskeleton; GO:0005524,ATP binding; GO:0000166,nucleotide binding; GO:0003674,molecular_function; GO:0005488,binding; GO:0017076,purine nucleotide binding; GO:0030554,adenyl nucleotide binding; GO:0032553,ribonucleotide binding; GO:0032555,purine ribonucleotide binding; GO:0032559,adenyl ribonucleotide binding; GO:0035639,purine ribonucleoside triphosphate bindi…	PF00022.22:Actin	--	--	--
PmuVar_Chr7_0402	11.4494	9.6496	11.0253	68.9377	74.7673	76.1591	264	253	285	1861	1686	1731	3.07851	3.13774e-200	4.66408e-198	up	Chr7	3288201	3289446	-	PmuVar_Chr7_0402	--	K19040 E3 ubiquitin-protein ligase ATL10/75/76/77/78 [EC:2.3.2.27] | (RefSeq) RING-H2 finger protein ATL78 (A)	--	PREDICTED: putative RING-H2 finger protein ATL21A [Prunus mume]	AT21A_ARATH RecName: Full=Putative RING-H2 finger protein ATL21A; EC=2.3.2.27 {ECO:0000305}; AltName: Full=RING-type E3 ubiquitin transferase ATL21A {ECO:0000305}; Flags: Precursor;	M5W9L7_PRUPE RecName: Full=RING-type domain-containing protein {ECO:0000259|PROSITE:PS50089};	FOG: Predicted E3 ubiquitin ligase	GO:0016021,integral component of membrane; GO:0046872,metal ion binding; GO:0030247,polysaccharide binding; GO:0016740,transferase activity; GO:0016567,protein ubiquitination; GO:0003674,molecular_function; GO:0005488,binding; GO:0043167,ion binding; GO:0043169,cation binding; GO:0030246,carbohydrate binding; GO:0003824,catalytic activity; GO:0006464,cellular protein modification process; GO:0006…	PF13947.9:Wall-associated receptor kinase galacturonan-binding	--	--	--
PmuVar_Chr7_0467	273	282.789	263.364	812.375	840.175	777.752	4307	5073	4658	15005	12963	12095	1.87001	7.11723e-200	1.04786e-197	up	Chr7	3888444	3890692	-	PmuVar_Chr7_0467	--	K15382 solute carrier family 50 (sugar transporter) | (RefSeq) bidirectional sugar transporter SWEET4-like (A)	--	PREDICTED: bidirectional sugar transporter SWEET4-like [Prunus mume]	SWET4_ORYSI RecName: Full=Bidirectional sugar transporter SWEET4; Short=OsSWEET4;	A0A6J5UU92_PRUAR RecName: Full=Bidirectional sugar transporter SWEET {ECO:0000256|RuleBase:RU910715};	Multitransmembrane protein	GO:0005887,integral component of plasma membrane; GO:0051119,sugar transmembrane transporter activity; GO:0003674,molecular_function; GO:0005215,transporter activity; GO:0008509,anion transmembrane transporter activity; GO:0015075,ion transmembrane transporter activity; GO:0015144,carbohydrate transmembrane transporter activity; GO:0022857,transmembrane transporter activity; GO:0005575,cellular_c…	PF03083.19:Sugar efflux transporter for intercellular exchange	--	--	--
PmuVar_Chr6_0354	0.8561	1.8195	1.4	37.9943	37.6787	40.8926	24	58	44	1247	1033	1130	5.12436	2.45922e-197	3.58652e-195	up	Chr6	3622234	3625009	-	PmuVar_Chr6_0354	--	K19861 benzyl alcohol O-benzoyltransferase [EC:2.3.1.196 2.3.1.232] | (RefSeq) benzyl alcohol O-benzoyltransferase (A)	--	PREDICTED: benzyl alcohol O-benzoyltransferase [Prunus mume]	BEBT1_PETHY RecName: Full=Benzyl alcohol O-benzoyltransferase {ECO:0000303|PubMed:15286288}; Short=PhBEBT1 {ECO:0000303|PubMed:15286288}; EC=2.3.1.196 {ECO:0000269|PubMed:15286288}; AltName: Full=Acetyl CoA:3-hydroxybenzyl alcohol acetyltransferase {ECO:0000305}; EC=2.3.1.- {ECO:0000269|PubMed:15286288}; AltName: Full=Acetyl CoA:benzyl alcohol acetyltransferase {ECO:0000305}; EC=2.3.1.224 {ECO:00…	A0A6J5Y070_PRUAR SubName: Full=Uncharacterized protein {ECO:0000313|EMBL:CAB4319329.1};	--	GO:0102387,2-phenylethanol acetyltransferase activity; GO:0102720,acetyl-coenzyme A:acetyl alcohol acetyltransferase activity; GO:0006084,acetyl-CoA metabolic process; GO:1901787,benzoyl-CoA metabolic process; GO:0007623,circadian rhythm; GO:0010597,green leaf volatile biosynthetic process; GO:0003674,molecular_function; GO:0003824,catalytic activity; GO:0016740,transferase activity; GO:0016746,t…	PF02458.18:Transferase family	--	--	--
PmuVar_Chr2_4762	173.099	166.928	164.892	557.645	552.21	551.491	1502	1647	1604	5665	4686	4717	2.02057	1.97285e-195	2.85031e-193	up	Chr2	34976146	34976574	+	PmuVar_Chr2_4762	--	--	--	hypothetical protein PRUPE_1G120300 [Prunus persica]	--	A0A251QWH8_PRUPE SubName: Full=Uncharacterized protein {ECO:0000313|EMBL:ONI28063.1};	--	--	PF15090.9:Domain of unknown function (DUF4553)	--	--	--
PmuVar_Chr3_1077	3.1223	3.1932	3.546	18.1938	20.4122	22.411	399	464	508	2722	2551	2823	2.93103	1.31319e-194	1.87968e-192	up	Chr3	6966704	7016571	+	PmuVar_Chr3_1077	--	K13418 somatic embryogenesis receptor kinase 1 [EC:2.7.10.1 2.7.11.1] | (RefSeq) somatic embryogenesis receptor kinase 2 (A)	--	PREDICTED: LOW QUALITY PROTEIN: uncharacterized protein LOC103325393 [Prunus mume]	Y5614_ARATH RecName: Full=Probable LRR receptor-like serine/threonine-protein kinase At1g56140; EC=2.7.11.1; Flags: Precursor;	A0A2H5N1G6_CITUN SubName: Full=Uncharacterized protein {ECO:0000313|EMBL:GAY33767.1}; Flags: Fragment;	--	GO:0016021,integral component of membrane; GO:0005886,plasma membrane; GO:0005524,ATP binding; GO:0106310,protein serine kinase activity; GO:0004674,protein serine/threonine kinase activity; GO:0006468,protein phosphorylation; GO:0000166,nucleotide binding; GO:0003674,molecular_function; GO:0005488,binding; GO:0017076,purine nucleotide binding; GO:0030554,adenyl nucleotide binding; GO:0032553,rib…	PF00069.28:Protein kinase domain	--	--	--
PmuVar_Chr5_2531	152.327	164.158	164.41	556.999	512.975	525.369	2662	3262	3221	11396	8767	9050	2.03268	1.59065e-194	2.25595e-192	up	Chr5	24332394	24335183	+	PmuVar_Chr5_2531	--	K09872 aquaporin PIP | (RefSeq) probable aquaporin PIP2-5 (A)	--	PREDICTED: probable aquaporin PIP2-5 [Prunus mume]	PIP25_ARATH RecName: Full=Probable aquaporin PIP2-5; AltName: Full=Plasma membrane intrinsic protein 2-5; Short=AtPIP2;5; AltName: Full=Plasma membrane intrinsic protein 2d; Short=PIP2d;	M5X3A5_PRUPE SubName: Full=Uncharacterized protein {ECO:0000313|EMBL:EMJ19971.1};	Aquaporin (major intrinsic protein family)	GO:0016021,integral component of membrane; GO:0005886,plasma membrane; GO:0015250,water channel activity; GO:0006833,water transport; GO:0003674,molecular_function; GO:0005215,transporter activity; GO:0005372,water transmembrane transporter activity; GO:0015267,channel activity; GO:0015318,inorganic molecular entity transmembrane transporter activity; GO:0022803,passive transmembrane transporter …	PF00230.23:Major intrinsic protein	--	--	--
PmuVar_Chr8_1503	32.6902	33.8575	35.1847	312.913	244.899	299.707	242	285	292	2712	1773	2187	3.37981	1.33246e-192	1.87259e-190	up	Chr8	8845565	8845973	+	PmuVar_Chr8_1503	--	--	--	PREDICTED: protein RALF-like 34 [Prunus mume]	RLF34_ARATH RecName: Full=Protein RALF-like 34; Flags: Precursor;	A0A6J5VGX6_PRUAR SubName: Full=Uncharacterized protein {ECO:0000313|EMBL:CAB4287412.1};	--	GO:0048046,apoplast; GO:0005179,hormone activity; GO:0019722,calcium-mediated signaling; GO:0007267,cell-cell signaling; GO:0003674,molecular_function; GO:0005102,signaling receptor binding; GO:0005488,binding; GO:0005515,protein binding; GO:0030545,receptor regulator activity; GO:0030546,signaling receptor activator activity; GO:0048018,receptor ligand activity; GO:0098772,molecular function reg…	PF05498.14:Rapid ALkalinization Factor (RALF)	--	--	--
PmuVar_Chr5_0223	13.6677	16.8366	11.1794	740.237	607.561	725.972	277	388	254	17564	12042	14503	5.9389	2.59456e-192	3.61345e-190	up	Chr5	2331371	2332443	+	PmuVar_Chr5_0223	--	K13420 LRR receptor-like serine/threonine-protein kinase FLS2 [EC:2.7.11.1] | (RefSeq) LOW QUALITY PROTEIN: LRR receptor-like serine/threonine-protein kinase FLS2 (A)	ko04016: MAPK signaling pathway - plant; ko04626: Plant-pathogen interaction	unnamed protein product [Prunus armeniaca]	DR100_ARATH RecName: Full=DNA damage-repair/toleration protein DRT100; Flags: Precursor;	A0A6J5U0E2_PRUAR RecName: Full=LRRNT_2 domain-containing protein {ECO:0000259|Pfam:PF08263};	FOG: Leucine rich repeat	GO:0009507,chloroplast; GO:0000166,nucleotide binding; GO:0006281,DNA repair; GO:0003674,molecular_function; GO:0005488,binding; GO:0036094,small molecule binding; GO:0097159,organic cyclic compound binding; GO:1901265,nucleoside phosphate binding; GO:1901363,heterocyclic compound binding; GO:0006139,nucleobase-containing compound metabolic process; GO:0006259,DNA metabolic process; GO:0006725,ce…	PF13855.9:Leucine rich repeat	--	--	--
PmuVar_Chr1_1860	541.89	515.376	480.505	2191.16	2073.44	1832.85	3880	4196	3857	18368	14519	12936	2.28856	1.54428e-191	2.13152e-189	up	Chr1	16070297	16070791	+	PmuVar_Chr1_1860	--	--	--	PREDICTED: non-specific lipid-transfer protein 1-like [Prunus mume]	NLTP1_PRUDU RecName: Full=Non-specific lipid-transfer protein 1; Short=LTP 1; Flags: Precursor;	E7CLQ5_PRUAR RecName: Full=Non-specific lipid-transfer protein {ECO:0000256|RuleBase:RU000628};	--	GO:0008289,lipid binding; GO:0006869,lipid transport; GO:0003674,molecular_function; GO:0005488,binding; GO:0006810,transport; GO:0006811,ion transport; GO:0006820,anion transport; GO:0008150,biological_process; GO:0010876,lipid localization; GO:0033036,macromolecule localization; GO:0051179,localization; GO:0051234,establishment of localization; GO:0071702,organic substance transport	PF00234.25:Protease inhibitor/seed storage/LTP family	--	--	--
PmuVar_Chr4_2503	337.166	349.226	344.115	66.5739	65.8414	71.4878	7713	9084	8825	1783	1473	1612	-2.03505	4.95741e-190	6.782e-188	down	Chr4	20034920	20036050	+	PmuVar_Chr4_2503	--	--	--	PREDICTED: transcription factor TCP13 [Prunus mume]	TCP13_ARATH RecName: Full=Transcription factor TCP13; AltName: Full=Plastid transcription factor 1; AltName: Full=TFPD;	M5WST0_PRUPE RecName: Full=TCP domain-containing protein {ECO:0000259|PROSITE:PS51369};	--	GO:0009507,chloroplast; GO:0005634,nucleus; GO:0003700,DNA-binding transcription factor activity; GO:0043565,sequence-specific DNA binding; GO:0048366,leaf development; GO:0010150,leaf senescence; GO:0031347,regulation of defense response; GO:2000032,regulation of secondary shoot formation; GO:0006355,regulation of transcription, DNA-templated; GO:0003674,molecular_function; GO:0140110,transcript…	PF03634.16:TCP family transcription factor	TCP	TF	TCP
PmuVar_Chr6_1082	555.484	504.43	550.964	1486.01	1558.67	1467.65	6539	6752	7271	20480	17944	17030	1.7878	8.76703e-190	1.18886e-187	up	Chr6	9026087	9026898	-	PmuVar_Chr6_1082	--	K14484 auxin-responsive protein IAA | (RefSeq) auxin-induced protein 22D-like (A)	ko04075: Plant hormone signal transduction	PREDICTED: auxin-induced protein 22D-like [Prunus mume]	AX22D_VIGRR RecName: Full=Auxin-induced protein 22D; AltName: Full=Indole-3-acetic acid-induced protein ARG13;	A0A6J5YC56_PRUAR RecName: Full=Auxin-responsive protein {ECO:0000256|RuleBase:RU004549};	--	GO:0005634,nucleus; GO:0009734,auxin-activated signaling pathway; GO:0006355,regulation of transcription, DNA-templated; GO:0007154,cell communication; GO:0007165,signal transduction; GO:0008150,biological_process; GO:0009719,response to endogenous stimulus; GO:0009725,response to hormone; GO:0009733,response to auxin; GO:0009755,hormone-mediated signaling pathway; GO:0009987,cellular process; GO…	PF02309.19:AUX/IAA family	AUX/IAA	TR	AUX/IAA
PmuVar_Chr6_2281	3.6144	4.0738	4.2716	23.9735	26.8049	28.8974	277	355	367	2151	2009	2183	3.03632	1.00372e-189	1.34927e-187	up	Chr6	16787162	16844860	-	PmuVar_Chr6_2281	--	K01897 long-chain acyl-CoA synthetase [EC:6.2.1.3] | (RefSeq) long chain acyl-CoA synthetase 2 (A)	ko00061: Fatty acid biosynthesis; ko00071: Fatty acid degradation; ko01100: Metabolic pathways; ko01212: Fatty acid metabolism; ko04146: Peroxisome	PREDICTED: long chain acyl-CoA synthetase [Prunus dulcis]	CCL6_HUMLU RecName: Full=Probable CoA ligase CCL6 {ECO:0000305|PubMed:23300257}; Short=HlCCL6 {ECO:0000303|PubMed:23300257}; EC=6.2.1.- {ECO:0000305|PubMed:23300257};	A0A5E4EHB1_PRUDU RecName: Full=Long-chain-fatty-acid--CoA ligase {ECO:0000256|ARBA:ARBA00026121, ECO:0000256|RuleBase:RU369030}; EC=6.2.1.3 {ECO:0000256|ARBA:ARBA00026121, ECO:0000256|RuleBase:RU369030};	Long-chain acyl-CoA synthetases (AMP-forming)	GO:0005829,cytosol; GO:0005524,ATP binding; GO:0016405,CoA-ligase activity; GO:0004467,long-chain fatty acid-CoA ligase activity; GO:0000166,nucleotide binding; GO:0003674,molecular_function; GO:0005488,binding; GO:0017076,purine nucleotide binding; GO:0030554,adenyl nucleotide binding; GO:0032553,ribonucleotide binding; GO:0032555,purine ribonucleotide binding; GO:0032559,adenyl ribonucleotide b…	PF00501.31:AMP-binding enzyme	--	--	--
PmuVar_Chr2_1677	7.8243	6.6816	10.2499	83.0383	73.2034	81.0638	207	201	304	2572	1894	2114	3.5654	2.54451e-189	3.391e-187	up	Chr2	12577759	12579066	+	PmuVar_Chr2_1677	--	K22683 aspartyl protease family protein [EC:3.4.23.-] | (RefSeq) LOW QUALITY PROTEIN: aspartyl protease family protein 2-like (A)	--	unnamed protein product [Prunus armeniaca]	ASPA_ARATH RecName: Full=Aspartyl protease family protein At5g10770; EC=3.4.23.- {ECO:0000305}; Flags: Precursor;	A0A6J5TSC2_PRUAR RecName: Full=Peptidase A1 domain-containing protein {ECO:0000259|PROSITE:PS51767};	Aspartyl protease	GO:0031225,anchored component of membrane; GO:0005886,plasma membrane; GO:0004190,aspartic-type endopeptidase activity; GO:0006508,proteolysis; GO:0003674,molecular_function; GO:0003824,catalytic activity; GO:0004175,endopeptidase activity; GO:0008233,peptidase activity; GO:0016787,hydrolase activity; GO:0070001,aspartic-type peptidase activity; GO:0140096,catalytic activity, acting on a protein;…	PF14543.9:Xylanase inhibitor N-terminal	--	--	--
PmuVar_Chr6_1180	345.976	332.237	337.535	913.892	895.684	938.797	12869	14052	14075	39798	32582	34421	1.73852	7.30275e-189	9.64899e-187	up	Chr6	9578684	9581905	+	PmuVar_Chr6_1180	--	K23872 putative homogalacturonan methyltransferase [EC:2.1.1.-] | (RefSeq) probable methyltransferase PMT13 (A)	--	PREDICTED: probable methyltransferase PMT3 [Prunus mume]	PMT3_ARATH RecName: Full=Probable methyltransferase PMT3; EC=2.1.1.-;	A0A6J5VVA3_PRUAR RecName: Full=Methyltransferase {ECO:0000256|RuleBase:RU366043}; EC=2.1.1.- {ECO:0000256|RuleBase:RU366043};	--	GO:0005737,cytoplasm; GO:0005768,endosome; GO:0005794,Golgi apparatus; GO:0000139,Golgi membrane; GO:0000138,Golgi trans cisterna; GO:0016021,integral component of membrane; GO:0009506,plasmodesma; GO:0005802,trans-Golgi network; GO:0008168,methyltransferase activity; GO:0032259,methylation; GO:0003674,molecular_function; GO:0003824,catalytic activity; GO:0016740,transferase activity; GO:0016741,…	PF03141.19:Putative S-adenosyl-L-methionine-dependent methyltransferase	--	--	--
PmuVar_Chr3_0371	8.7248	8.6203	9.416	129.632	112.123	141.073	81	91	98	1409	1018	1291	4.1426	3.43561e-186	4.50094e-184	up	Chr3	2154542	2155000	+	PmuVar_Chr3_0371	--	--	--	hypothetical protein GBA52_012792 [Prunus armeniaca]	--	A0A6J5WX84_PRUAR SubName: Full=Uncharacterized protein {ECO:0000313|EMBL:CAB4306366.1};	--	--	--	--	--	--
PmuVar_Chr6_2571	2.2235	2.9907	4.0835	162.997	163.165	124.994	17	26	35	1459	1220	942	5.89044	4.52498e-185	5.87829e-183	up	Chr6	19333539	19334002	-	PmuVar_Chr6_2571	--	K14488 SAUR family protein | (RefSeq) auxin-induced protein 15A-like (A)	ko04075: Plant hormone signal transduction	hypothetical protein L3X38_043119 [Prunus dulcis]	ARG7_VIGRR RecName: Full=Indole-3-acetic acid-induced protein ARG7;	A0A251MUV2_PRUPE SubName: Full=Uncharacterized protein {ECO:0000313|EMBL:ONH90872.1};	--	GO:0009733,response to auxin; GO:0008150,biological_process; GO:0009719,response to endogenous stimulus; GO:0009725,response to hormone; GO:0010033,response to organic substance; GO:0042221,response to chemical; GO:0050896,response to stimulus	PF02519.17:Auxin responsive protein	--	--	--
PmuVar_Chr5_2244	49.2173	52.4118	49.5767	172.572	166.993	173.19	1323	1602	1494	5431	4390	4589	2.0639	1.6862e-184	2.17225e-182	up	Chr5	22333541	22336521	+	PmuVar_Chr5_2244	--	K23877 xyloglucan O-acetyltransferase | (RefSeq) protein ALTERED XYLOGLUCAN 4 (A)	--	PREDICTED: protein trichome birefringence-like 25 isoform X1 [Prunus mume]	TBL25_ARATH RecName: Full=Protein trichome birefringence-like 25;	A0A6J5U2E0_PRUAR RecName: Full=PMR5N domain-containing protein {ECO:0000259|Pfam:PF14416};	--	GO:0005794,Golgi apparatus; GO:0016021,integral component of membrane; GO:0016413,O-acetyltransferase activity; GO:0003674,molecular_function; GO:0003824,catalytic activity; GO:0008374,O-acyltransferase activity; GO:0016407,acetyltransferase activity; GO:0016740,transferase activity; GO:0016746,transferase activity, transferring acyl groups; GO:0016747,transferase activity, transferring acyl grou…	PF13839.9:GDSL/SGNH-like Acyl-Esterase family found in Pmr5 and Cas1p	--	--	--
PmuVar_Chr2_4832	100.621	92.6318	103.36	416.611	381.722	375.605	983	1029	1132	4765	3647	3617	2.288	1.37209e-183	1.75299e-181	up	Chr2	35413802	35414383	+	PmuVar_Chr2_4832	--	K14496 abscisic acid receptor PYR/PYL family | (RefSeq) abscisic acid receptor PYL2 (A)	ko04016: MAPK signaling pathway - plant; ko04075: Plant hormone signal transduction	PREDICTED: major allergen Pru av 1 [Prunus mume]	PRU1_PRUAV RecName: Full=Major allergen Pru av 1; AltName: Full=Allergen Pru a 1; AltName: Allergen=Pru av 1;	B5KVN9_PRUDO SubName: Full=Pathogenesis related protein PR10 {ECO:0000313|EMBL:ABW99631.1};	--	GO:0010427,abscisic acid binding; GO:0004864,protein phosphatase inhibitor activity; GO:0038023,signaling receptor activity; GO:0009738,abscisic acid-activated signaling pathway; GO:0006952,defense response; GO:0009607,response to biotic stimulus; GO:0003674,molecular_function; GO:0005488,binding; GO:0008289,lipid binding; GO:0019840,isoprenoid binding; GO:0031406,carboxylic acid binding; GO:0033…	PF00407.22:Pathogenesis-related protein Bet v 1 family	--	--	--
PmuVar_Chr6_1879	167.829	173.011	168.782	511.14	479.914	472.563	4379	5133	4937	15614	12246	12154	1.82424	4.47204e-183	5.66667e-181	up	Chr6	13687334	13689660	-	PmuVar_Chr6_1879	--	K07374 tubulin alpha | (RefSeq) tubulin alpha chain (A)	ko04145: Phagosome	tubulin alpha chain isoform X1 [Pistacia vera]	TBA_PRUDU RecName: Full=Tubulin alpha chain;	A0A8J4VWM5_9ROSI RecName: Full=Tubulin alpha chain {ECO:0000256|RuleBase:RU000352};	Alpha tubulin	GO:0005737,cytoplasm; GO:0005874,microtubule; GO:0005525,GTP binding; GO:0005200,structural constituent of cytoskeleton; GO:0007017,microtubule-based process; GO:0000166,nucleotide binding; GO:0001882,nucleoside binding; GO:0001883,purine nucleoside binding; GO:0003674,molecular_function; GO:0005488,binding; GO:0017076,purine nucleotide binding; GO:0019001,guanyl nucleotide binding; GO:0032549,ri…	PF00091.28:Tubulin/FtsZ family, GTPase domain	--	--	--
PmuVar_Chr2_1724	8.8956	9.2974	8.5272	39.8904	47.5846	46.9241	536	637	576	2814	2804	2787	2.63096	3.9578e-181	4.97428e-179	up	Chr2	12888801	12895545	-	PmuVar_Chr2_1724	--	K20718 LRR receptor-like serine/threonine-protein kinase ERECTA [EC:2.7.11.1] | (RefSeq) LRR receptor-like serine/threonine-protein kinase ERECTA isoform X1 (A)	ko04016: MAPK signaling pathway - plant	PREDICTED: LRR receptor-like serine/threonine-protein kinase ERECTA isoform X1 [Prunus mume]	ERECT_ARATH RecName: Full=LRR receptor-like serine/threonine-protein kinase ERECTA {ECO:0000303|PubMed:8624444}; EC=2.7.11.1; AltName: Full=Protein QUANTITATIVE RESISTANCE TO PLECTOSPHAERELLA 1; AltName: Full=Protein QUANTITATIVE RESISTANCE TO RALSTONIA SOLANACEARUM 1; AltName: Full=Protein TRANSPIRATION EFFICIENCY 1; Flags: Precursor;	A0A6J5TRZ7_PRUAR RecName: Full=Protein kinase domain-containing protein {ECO:0000259|PROSITE:PS50011};	--	GO:0016021,integral component of membrane; GO:0005739,mitochondrion; GO:0005886,plasma membrane; GO:0005524,ATP binding; GO:0042277,peptide binding; GO:0106310,protein serine kinase activity; GO:0004674,protein serine/threonine kinase activity; GO:0033612,receptor serine/threonine kinase binding; GO:0005102,signaling receptor binding; GO:0019199,transmembrane receptor protein kinase activity; GO:…	PF00069.28:Protein kinase domain	--	--	--
PmuVar_Chr5_3311	17.7023	13.3535	14.6344	104.767	94.709	111.284	478	410	443	3312	2501	2962	3.0717	8.91673e-181	1.11164e-178	up	Chr5	28902358	28904204	-	PmuVar_Chr5_3311	--	K19747 BAHD acyltransferase [EC:2.3.1.-] | (RefSeq) BAHD acyltransferase DCR (A)	--	unnamed protein product [Prunus armeniaca]	DCR_ARATH RecName: Full=BAHD acyltransferase DCR; EC=2.3.1.-; AltName: Full=Protein DEFECTIVE IN CUTICULAR RIDGES; AltName: Full=Protein PERMEABLE LEAVES 3;	A0A6J5U585_PRUAR SubName: Full=Uncharacterized protein {ECO:0000313|EMBL:CAB4271456.1};	--	GO:0005737,cytoplasm; GO:0005829,cytosol; GO:0016746,transferase activity, transferring acyl groups; GO:0010143,cutin biosynthetic process; GO:0051179,localization; GO:0090626,plant epidermis morphogenesis; GO:0010090,trichome morphogenesis; GO:0003674,molecular_function; GO:0003824,catalytic activity; GO:0016740,transferase activity; GO:0008150,biological_process; GO:0008152,metabolic process; G…	PF02458.18:Transferase family	--	--	--
PmuVar_Chr3_1598	244.431	247.705	248.17	1140.71	1311.12	949.331	3263	3760	3714	17828	17117	12492	2.49901	2.19607e-180	2.71592e-178	up	Chr3	11102249	11103120	-	PmuVar_Chr3_1598	--	K00799 glutathione S-transferase [EC:2.5.1.18] | (RefSeq) probable glutathione S-transferase (A)	ko00480: Glutathione metabolism; ko01100: Metabolic pathways	PREDICTED: probable glutathione S-transferase [Prunus mume]	GSTXC_TOBAC RecName: Full=Probable glutathione S-transferase parC; EC=2.5.1.18; AltName: Full=Auxin-regulated protein parC;	A0A251PNW9_PRUPE RecName: Full=Glutathione transferase {ECO:0000256|ARBA:ARBA00012452}; EC=2.5.1.18 {ECO:0000256|ARBA:ARBA00012452};	Glutathione S-transferase	GO:0005737,cytoplasm; GO:0004364,glutathione transferase activity; GO:0009734,auxin-activated signaling pathway; GO:0006749,glutathione metabolic process; GO:0003674,molecular_function; GO:0003824,catalytic activity; GO:0016740,transferase activity; GO:0016765,transferase activity, transferring alkyl or aryl (other than methyl) groups; GO:0007154,cell communication; GO:0007165,signal transduction…	PF02798.23:Glutathione S-transferase, N-terminal domain	--	--	--
PmuVar_Chr4_2692	1.4685	2.3438	2.2803	50.0807	48.3854	54.8469	27	49	47	1078	870	994	4.94489	1.49346e-179	1.83234e-177	up	Chr4	21452464	21453470	+	PmuVar_Chr4_2692	--	--	--	PREDICTED: LOB domain-containing protein 41 [Prunus mume]	LBD41_ARATH RecName: Full=LOB domain-containing protein 41; AltName: Full=ASYMMETRIC LEAVES 2-like protein 38; Short=AS2-like protein 38;	A0A6J5UGA0_PRUAR RecName: Full=LOB domain-containing protein {ECO:0000259|PROSITE:PS50891};	--	GO:0071456,cellular response to hypoxia; GO:0010468,regulation of gene expression; GO:0006355,regulation of transcription, DNA-templated; GO:0001666,response to hypoxia; GO:0006950,response to stress; GO:0008150,biological_process; GO:0009628,response to abiotic stimulus; GO:0009987,cellular process; GO:0033554,cellular response to stress; GO:0036293,response to decreased oxygen levels; GO:003629…	PF03195.17:Lateral organ boundaries (LOB) domain	LOB	TF	LOB
PmuVar_Chr6_2118	134.765	134.59	144.752	461.629	429.984	422.355	2028	2303	2442	8133	6328	6265	1.96854	1.58727e-178	1.93209e-176	up	Chr6	15428843	15430058	-	PmuVar_Chr6_2118	--	K00588 caffeoyl-CoA O-methyltransferase [EC:2.1.1.104] | (RefSeq) caffeoyl-CoA O-methyltransferase (A)	ko00940: Phenylpropanoid biosynthesis; ko00941: Flavonoid biosynthesis; ko00945: Stilbenoid, diarylheptanoid and gingerol biosynthesis; ko01100: Metabolic pathways; ko01110: Biosynthesis of secondary metabolites	caffeoyl-CoA O-methyltransferase [Prunus mume]	CAMT_POPTM RecName: Full=Caffeoyl-CoA O-methyltransferase; EC=2.1.1.104; AltName: Full=Trans-caffeoyl-CoA 3-O-methyltransferase; Short=CCoAMT; Short=CCoAOMT;	A0A6J5VT30_PRUAR SubName: Full=Uncharacterized protein {ECO:0000313|EMBL:CAB4290515.1};	O-methyltransferase	GO:0042409,caffeoyl-CoA O-methyltransferase activity; GO:0046872,metal ion binding; GO:0009809,lignin biosynthetic process; GO:0032259,methylation; GO:0003674,molecular_function; GO:0003824,catalytic activity; GO:0008168,methyltransferase activity; GO:0008171,O-methyltransferase activity; GO:0008757,S-adenosylmethionine-dependent methyltransferase activity; GO:0016740,transferase activity; GO:001…	PF01596.20:O-methyltransferase	--	--	--
PmuVar_Chr5_2161	0.654	0.5751	0.8459	30.1918	33.3351	36.1248	20	20	29	1081	997	1089	5.88647	1.81187e-178	2.18826e-176	up	Chr5	21776993	21783898	+	PmuVar_Chr5_2161	--	K01184 polygalacturonase [EC:3.2.1.15] | (RefSeq) polygalacturonase (A)	ko00040: Pentose and glucuronate interconversions; ko01100: Metabolic pathways	hypothetical protein GBA52_007428 [Prunus armeniaca]	PGLR_VITVI RecName: Full=Probable polygalacturonase; Short=PG {ECO:0000250|UniProtKB:Q7M1E7}; EC=3.2.1.15; AltName: Full=Pectinase {ECO:0000250|UniProtKB:Q7M1E7};	A0A6J5U4M0_PRUAR SubName: Full=Uncharacterized protein {ECO:0000313|EMBL:CAB4270065.1};	--	GO:0016021,integral component of membrane; GO:0004650,polygalacturonase activity; GO:0005975,carbohydrate metabolic process; GO:0003674,molecular_function; GO:0003824,catalytic activity; GO:0004553,hydrolase activity, hydrolyzing O-glycosyl compounds; GO:0016787,hydrolase activity; GO:0016798,hydrolase activity, acting on glycosyl bonds; GO:0008150,biological_process; GO:0008152,metabolic process…	PF00295.20:Glycosyl hydrolases family 28	--	--	--
PmuVar_Chr5_2729	20.3485	19.5265	20.4672	91.6555	98.833	90.7983	384	419	433	2025	1824	1689	2.52239	1.9485e-177	2.33503e-175	up	Chr5	25655602	25658039	+	PmuVar_Chr5_2729	--	K10258 very-long-chain enoyl-CoA reductase [EC:1.3.1.93] | (RefSeq) very-long-chain enoyl-CoA reductase (A)	ko00062: Fatty acid elongation; ko01040: Biosynthesis of unsaturated fatty acids; ko01100: Metabolic pathways; ko01110: Biosynthesis of secondary metabolites; ko01212: Fatty acid metabolism	PREDICTED: very-long-chain enoyl-CoA reductase [Prunus mume]	TECR_ARATH RecName: Full=Very-long-chain enoyl-CoA reductase {ECO:0000305}; EC=1.3.1.93 {ECO:0000305|PubMed:14673020, ECO:0000305|PubMed:15829606}; AltName: Full=Enoyl-CoA reductase; Short=AtECR; AltName: Full=Protein ECERIFERUM 10; AltName: Full=Synaptic glycoprotein SC2-like protein;	M5XLI9_PRUPE RecName: Full=S5A_REDUCTASE domain-containing protein {ECO:0000259|PROSITE:PS50244};	Steroid reductase required for elongation of the very long chain fatty acids	GO:0005829,cytosol; GO:0005783,endoplasmic reticulum; GO:0005789,endoplasmic reticulum membrane; GO:0009923,fatty acid elongase complex; GO:0016021,integral component of membrane; GO:0009922,fatty acid elongase activity; GO:0016491,oxidoreductase activity; GO:0102758,very-long-chain enoyl-CoA reductase activity; GO:0042335,cuticle development; GO:0006665,sphingolipid metabolic process; GO:0010091…	PF02544.19:3-oxo-5-alpha-steroid 4-dehydrogenase	--	--	--
PmuVar_Chr3_1848	128.773	131.665	135.979	374.022	360.418	386.438	4532	5269	5365	15411	12405	13406	1.8024	1.60277e-175	1.90594e-173	up	Chr3	13102843	13107239	-	PmuVar_Chr3_1848	--	K07300 Ca2+:H+ antiporter | (RefSeq) vacuolar cation/proton exchanger 2-like (A)	--	PREDICTED: uncharacterized protein LOC103326027 [Prunus mume]	NCL_ARATH RecName: Full=Sodium/calcium exchanger NCL {ECO:0000305}; AltName: Full=Na(+)/Ca(2+)-exchange protein NCL {ECO:0000305}; AltName: Full=Protein NCX-like {ECO:0000303|PubMed:23148213}; Short=AtNCL {ECO:0000303|PubMed:23148213};	A0A6J5UNC3_PRUAR SubName: Full=Uncharacterized protein {ECO:0000313|EMBL:CAB4277403.1};	--	GO:0016021,integral component of membrane; GO:0016020,membrane; GO:0000325,plant-type vacuole; GO:0005886,plasma membrane; GO:0009506,plasmodesma; GO:0005774,vacuolar membrane; GO:0005773,vacuole; GO:0005509,calcium ion binding; GO:0015369,calcium:proton antiporter activity; GO:0005432,calcium:sodium antiporter activity; GO:0003729,mRNA binding; GO:0055074,calcium ion homeostasis; GO:0070588,calc…	PF01699.27:Sodium/calcium exchanger protein	--	--	--
PmuVar_Chr3_3118	10.1797	10.8882	9.9148	48.1514	53.649	52.7526	370	450	404	2049	1907	1890	2.6191	1.98616e-175	2.34382e-173	up	Chr3	25876758	25889892	-	PmuVar_Chr3_3118	--	K02433 aspartyl-tRNA(Asn)/glutamyl-tRNA(Gln) amidotransferase subunit A [EC:6.3.5.6 6.3.5.7] | (RefSeq) glutamyl-tRNA(Gln) amidotransferase subunit A, chloroplastic/mitochondrial (A)	ko00970: Aminoacyl-tRNA biosynthesis; ko01100: Metabolic pathways	PREDICTED: fatty acid amide hydrolase-like isoform X1 [Prunus mume]	FAAH_ARATH RecName: Full=Fatty acid amide hydrolase {ECO:0000303|PubMed:12824167}; Short=AtFAAH {ECO:0000303|PubMed:16880402}; EC=3.5.1.99 {ECO:0000269|PubMed:12824167}; AltName: Full=N-acylethanolamine amidohydrolase {ECO:0000303|PubMed:12824167};	A0A314ZRE0_PRUYE SubName: Full=Fatty acid amide hydrolase {ECO:0000313|EMBL:PQQ19828.1};	Amidases	GO:0005783,endoplasmic reticulum; GO:0005789,endoplasmic reticulum membrane; GO:0005794,Golgi apparatus; GO:0016020,membrane; GO:0000325,plant-type vacuole; GO:0005886,plasma membrane; GO:0009536,plastid; GO:0103073,anandamide amidohydrolase activity; GO:0047412,N-(long-chain-acyl)ethanolamine deacylase activity; GO:0102077,oleamide hydrolase activity; GO:0042742,defense response to bacterium; GO…	PF01425.24:Amidase	--	--	--
novel.954	26.6794	28.7841	26.7281	170.444	153.902	133.985	463	568	520	3463	2612	2292	2.78091	8.23353e-175	9.64258e-173	up	Chr5	30309046	30312093	+	--	--	--	--	uncharacterized protein LOC117612936 isoform X3 [Prunus dulcis]	--	A0A4Y1RMX1_PRUDU SubName: Full=Uncharacterized protein {ECO:0000313|EMBL:BBH05559.1};	--	GO:0016021,integral component of membrane; GO:0005575,cellular_component; GO:0016020,membrane; GO:0031224,intrinsic component of membrane; GO:0110165,cellular anatomical entity	--	--	--	--
PmuVar_Chr5_2784	124.616	124.928	126.733	26.9653	28.8083	27.4255	5467	6232	6233	1385	1236	1186	-1.87597	8.63546e-175	1.00373e-172	down	Chr5	25958771	25964509	-	PmuVar_Chr5_2784	--	K12657 delta-1-pyrroline-5-carboxylate synthetase [EC:2.7.2.11 1.2.1.41] | (RefSeq) delta-1-pyrroline-5-carboxylate synthase (A)	ko00330: Arginine and proline metabolism; ko01100: Metabolic pathways; ko01110: Biosynthesis of secondary metabolites; ko01230: Biosynthesis of amino acids	hypothetical protein GBA52_006857 [Prunus armeniaca]	P5CS_ACTDE RecName: Full=Delta-1-pyrroline-5-carboxylate synthase; Short=P5CS; Includes: RecName: Full=Glutamate 5-kinase; Short=GK; EC=2.7.2.11; AltName: Full=Gamma-glutamyl kinase; Includes: RecName: Full=Gamma-glutamyl phosphate reductase; Short=GPR; EC=1.2.1.41; AltName: Full=Glutamate-5-semialdehyde dehydrogenase; AltName: Full=Glutamyl-gamma-semialdehyde dehydrogenase;	A0A6J5U4E3_PRUAR RecName: Full=Delta-1-pyrroline-5-carboxylate synthase {ECO:0000256|PIRNR:PIRNR036429}; Includes: RecName: Full=Glutamate 5-kinase {ECO:0000256|PIRNR:PIRNR036429}; Short=GK {ECO:0000256|PIRNR:PIRNR036429}; EC=2.7.2.11 {ECO:0000256|PIRNR:PIRNR036429}; AltName: Full=Gamma-glutamyl kinase {ECO:0000256|PIRNR:PIRNR036429}; Includes: RecName: Full=Gamma-glutamyl phosphate reductase {EC…	Gamma-glutamyl phosphate reductase	GO:0005737,cytoplasm; GO:0005524,ATP binding; GO:0004349,glutamate 5-kinase activity; GO:0004350,glutamate-5-semialdehyde dehydrogenase activity; GO:0055129,L-proline biosynthetic process; GO:0016310,phosphorylation; GO:0000166,nucleotide binding; GO:0003674,molecular_function; GO:0005488,binding; GO:0017076,purine nucleotide binding; GO:0030554,adenyl nucleotide binding; GO:0032553,ribonucleotid…	PF00696.31:Amino acid kinase family	--	--	--
PmuVar_Chr5_2641	119.994	103.658	110.694	474.254	418.724	462.583	1580	1552	1634	7311	5392	6004	2.32342	1.14777e-174	1.32414e-172	up	Chr5	25112114	25113187	-	PmuVar_Chr5_2641	--	K01859 chalcone isomerase [EC:5.5.1.6] | (RefSeq) chalcone--flavonone isomerase (A)	ko00941: Flavonoid biosynthesis; ko01100: Metabolic pathways; ko01110: Biosynthesis of secondary metabolites	PREDICTED: chalcone--flavonone isomerase [Prunus mume]	CFI_PYRCO RecName: Full=Chalcone--flavanone isomerase; Short=Chalcone isomerase; EC=5.5.1.6;	A0A0K1TPH0_9ROSA RecName: Full=Chalcone-flavonone isomerase family protein {ECO:0000256|RuleBase:RU361158};	--	GO:0045430,chalcone isomerase activity; GO:0009813,flavonoid biosynthetic process; GO:0003674,molecular_function; GO:0003824,catalytic activity; GO:0016853,isomerase activity; GO:0016872,intramolecular lyase activity; GO:0008150,biological_process; GO:0008152,metabolic process; GO:0009058,biosynthetic process; GO:0009812,flavonoid metabolic process; GO:0071704,organic substance metabolic process;…	PF02431.18:Chalcone-flavanone isomerase	--	--	--
PmuVar_Chr3_0577	2.6208	3.8675	3.1699	46.1375	42.5147	42.1804	59	99	80	1216	936	936	4.05579	8.82344e-174	1.01038e-171	up	Chr3	3227355	3228875	-	PmuVar_Chr3_0577	--	--	--	PREDICTED: GDSL esterase/lipase At5g45950 [Prunus mume]	GDL85_ARATH RecName: Full=GDSL esterase/lipase At5g45950; EC=3.1.1.-; AltName: Full=Extracellular lipase At5g45950; Flags: Precursor;	A0A6P5REN2_PRUAV SubName: Full=GDSL esterase/lipase At5g45950 {ECO:0000313|RefSeq:XP_021803370.1};	--	GO:0005576,extracellular region; GO:0016788,hydrolase activity, acting on ester bonds; GO:0016042,lipid catabolic process; GO:0003674,molecular_function; GO:0003824,catalytic activity; GO:0016787,hydrolase activity; GO:0006629,lipid metabolic process; GO:0008150,biological_process; GO:0008152,metabolic process; GO:0009056,catabolic process; GO:0044238,primary metabolic process; GO:0071704,organic…	PF00657.25:GDSL-like Lipase/Acylhydrolase	--	--	--
PmuVar_Chr1_1149	927.534	956.301	954.594	217.247	234.082	197.689	18573	21774	21429	5093	4584	3902	-1.82806	3.92995e-173	4.46714e-171	down	Chr1	11700134	11701830	-	PmuVar_Chr1_1149	--	K00430 peroxidase [EC:1.11.1.7] | (RefSeq) peroxidase 73-like (A)	ko00940: Phenylpropanoid biosynthesis; ko01100: Metabolic pathways; ko01110: Biosynthesis of secondary metabolites	PREDICTED: peroxidase 73-like [Prunus mume]	PER51_ARATH RecName: Full=Peroxidase 51; Short=Atperox P51; EC=1.11.1.7; AltName: Full=ATP37; Flags: Precursor;	A0A6J5XTQ1_PRUAR RecName: Full=Peroxidase {ECO:0000256|ARBA:ARBA00012313, ECO:0000256|RuleBase:RU362060}; EC=1.11.1.7 {ECO:0000256|ARBA:ARBA00012313, ECO:0000256|RuleBase:RU362060};	--	GO:0005576,extracellular region; GO:0020037,heme binding; GO:0046872,metal ion binding; GO:0004601,peroxidase activity; GO:0042744,hydrogen peroxide catabolic process; GO:0006979,response to oxidative stress; GO:0003674,molecular_function; GO:0005488,binding; GO:0046906,tetrapyrrole binding; GO:0097159,organic cyclic compound binding; GO:1901363,heterocyclic compound binding; GO:0043167,ion bindi…	PF00141.26:Peroxidase	--	--	--
PmuVar_Chr2_2495	62.383	67.8382	64.7282	277.402	252.507	252.097	723	894	841	3764	2862	2880	2.30634	5.31151e-173	5.99348e-171	up	Chr2	17544837	17545409	-	PmuVar_Chr2_2495	--	--	--	PREDICTED: uncharacterized protein LOC103341559 [Prunus mume]	--	A0A5E4G731_PRUDU SubName: Full=Uncharacterized protein {ECO:0000313|EMBL:VVA35473.1};	--	--	PF14009.9:PADRE domain	--	--	--
PmuVar_Chr6_1108	62.6246	68.8579	62.2319	196.381	205.125	198.332	1938	2423	2159	7115	6208	6050	1.93171	9.60172e-173	1.0756e-170	up	Chr6	9170701	9172230	+	PmuVar_Chr6_1108	--	K20769 fatty acid omega-hydroxylase [EC:1.14.-.-] | (RefSeq) cytochrome P450 94A1-like (A)	ko00073: Cutin, suberine and wax biosynthesis	cytochrome P450 94A91 [Prunus mume]	C94A2_VICSA RecName: Full=Cytochrome P450 94A2; EC=1.14.-.-; AltName: Full=P450-dependent fatty acid omega-hydroxylase;	A0A6J5YC20_PRUAR SubName: Full=Uncharacterized protein {ECO:0000313|EMBL:CAB4321893.1};	Cytochrome P450 CYP4/CYP19/CYP26 subfamilies	GO:0005789,endoplasmic reticulum membrane; GO:0016021,integral component of membrane; GO:0020037,heme binding; GO:0005506,iron ion binding; GO:0004497,monooxygenase activity; GO:0016705,oxidoreductase activity, acting on paired donors, with incorporation or reduction of molecular oxygen; GO:0003674,molecular_function; GO:0005488,binding; GO:0046906,tetrapyrrole binding; GO:0097159,organic cyclic …	PF00067.25:Cytochrome P450	--	--	--
PmuVar_Chr7_0916	1.9163	1.8927	1.9066	18.8484	18.9315	24.3307	130	146	145	1497	1256	1627	3.74552	2.00414e-172	2.22892e-170	up	Chr7	6775189	6779118	+	PmuVar_Chr7_0916	--	K00924 kinase [EC:2.7.1.-] | (RefSeq) receptor protein kinase CLAVATA1 (A)	--	PREDICTED: probable LRR receptor-like serine/threonine-protein kinase At4g26540 [Prunus mume]	RGI4_ARATH RecName: Full=Leucine-rich repeat receptor-like serine/threonine-protein kinase RGI4 {ECO:0000305|PubMed:27229312}; EC=2.7.11.1 {ECO:0000255|PROSITE-ProRule:PRU00159}; AltName: Full=Protein RECEPTOR OF RGF1 2 {ECO:0000303|PubMed:27229311}; AltName: Full=Protein RGF1 INSENSITIVE 4 {ECO:0000303|PubMed:27229312}; AltName: Full=Protein STERILITY-REGULATING KINASE MEMBER 2 {ECO:0000303|PubM…	A0A6J5XE02_PRUAR RecName: Full=Protein kinase domain-containing protein {ECO:0000259|PROSITE:PS50011};	--	GO:0016021,integral component of membrane; GO:0005886,plasma membrane; GO:0005524,ATP binding; GO:0042802,identical protein binding; GO:0042277,peptide binding; GO:0001653,peptide receptor activity; GO:0004674,protein serine/threonine kinase activity; GO:0010074,maintenance of meristem identity; GO:0006468,protein phosphorylation; GO:0080092,regulation of pollen tube growth; GO:0010082,regulation…	PF13855.9:Leucine rich repeat	--	--	--
PmuVar_Chr7_1148	32.8698	33.287	31.9048	133.959	123.331	132.557	726	836	790	3464	2664	2886	2.29416	3.22248e-172	3.55831e-170	up	Chr7	8176753	8178415	+	PmuVar_Chr7_1148	--	K09422 transcription factor MYB, plant | (RefSeq) myb-related protein 306-like (A)	--	PREDICTED: myb-related protein 306-like [Prunus mume]	MYB06_ANTMA RecName: Full=Myb-related protein 306;	M5WUN2_PRUPE SubName: Full=Uncharacterized protein {ECO:0000313|EMBL:EMJ10475.1};	Transcription factor, Myb superfamily	GO:0005634,nucleus; GO:0003677,DNA binding; GO:0003674,molecular_function; GO:0003676,nucleic acid binding; GO:0005488,binding; GO:0097159,organic cyclic compound binding; GO:1901363,heterocyclic compound binding; GO:0005575,cellular_component; GO:0005622,intracellular anatomical structure; GO:0043226,organelle; GO:0043227,membrane-bounded organelle; GO:0043229,intracellular organelle; GO:0043231…	PF00249.34:Myb-like DNA-binding domain	MYB	TF	MYB->MYB
PmuVar_Chr1_1935	13.3901	12.5424	10.6013	126.621	106.375	103.609	169	180	150	1871	1313	1289	3.5089	1.74097e-171	1.90877e-169	up	Chr1	16475933	16476556	-	PmuVar_Chr1_1935	--	K13448 calcium-binding protein CML | (RefSeq) calcium-binding protein CML42 (A)	ko04626: Plant-pathogen interaction	PREDICTED: calcium-binding protein CML42 [Prunus mume]	ALLB3_BETPN RecName: Full=Calcium-binding allergen Bet v 3; AltName: Full=Allergen Bet v III; AltName: Allergen=Bet v 3;	A0A6J5XWP5_PRUAR SubName: Full=Uncharacterized protein {ECO:0000313|EMBL:CAB4315424.1};	Calmodulin and related proteins (EF-Hand superfamily)	GO:0005509,calcium ion binding; GO:0003674,molecular_function; GO:0005488,binding; GO:0043167,ion binding; GO:0043169,cation binding; GO:0046872,metal ion binding	PF00036.35:EF hand	--	--	--
PmuVar_Chr4_2226	14.3131	14.7593	14.0711	111.794	92.915	124.395	284	333	313	2597	1803	2433	3.23596	4.98196e-169	5.42367e-167	up	Chr4	18584499	18585479	+	PmuVar_Chr4_2226	--	K00430 peroxidase [EC:1.11.1.7] | (RefSeq) LOW QUALITY PROTEIN: peroxidase 63 (A)	ko00940: Phenylpropanoid biosynthesis; ko01100: Metabolic pathways; ko01110: Biosynthesis of secondary metabolites	hypothetical protein GBA52_025186 [Prunus armeniaca]	PER63_ARATH RecName: Full=Peroxidase 63; Short=Atperox P63; EC=1.11.1.7; AltName: Full=ATP26a; Flags: Precursor;	A0A6J5WV01_PRUAR RecName: Full=Peroxidase {ECO:0000256|ARBA:ARBA00012313, ECO:0000256|RuleBase:RU362060}; EC=1.11.1.7 {ECO:0000256|ARBA:ARBA00012313, ECO:0000256|RuleBase:RU362060};	--	GO:0005576,extracellular region; GO:0020037,heme binding; GO:0046872,metal ion binding; GO:0004601,peroxidase activity; GO:0042744,hydrogen peroxide catabolic process; GO:0006979,response to oxidative stress; GO:0003674,molecular_function; GO:0005488,binding; GO:0046906,tetrapyrrole binding; GO:0097159,organic cyclic compound binding; GO:1901363,heterocyclic compound binding; GO:0043167,ion bindi…	PF00141.26:Peroxidase	--	--	--
PmuVar_Chr4_2880	31.587	34.4218	32.8238	117.683	121.099	127.359	782	969	911	3411	2932	3108	2.19089	7.94795e-168	8.59213e-166	up	Chr4	22723406	22726827	+	PmuVar_Chr4_2880	--	K20855 beta-1,3-galactosyltransferase 1/2/3/4/5/7/8 [EC:2.4.1.-] | (RefSeq) probable beta-1,3-galactosyltransferase 2 (A)	--	PREDICTED: probable beta-1,3-galactosyltransferase 2 [Prunus mume]	B3GT2_ARATH RecName: Full=Probable beta-1,3-galactosyltransferase 2; EC=2.4.1.-;	A0A6J5UD50_PRUAR RecName: Full=Hexosyltransferase {ECO:0000256|RuleBase:RU363063}; EC=2.4.1.- {ECO:0000256|RuleBase:RU363063};	Galactosyltransferases	GO:0005794,Golgi apparatus; GO:0000139,Golgi membrane; GO:0016021,integral component of membrane; GO:0008378,galactosyltransferase activity; GO:0016757,transferase activity, transferring glycosyl groups; GO:0008194,UDP-glycosyltransferase activity; GO:0006486,protein glycosylation; GO:0003674,molecular_function; GO:0003824,catalytic activity; GO:0016740,transferase activity; GO:0016758,transferas…	PF01762.24:Galactosyltransferase	--	--	--
PmuVar_Chr5_1117	34.8096	36.5205	37.7457	2.2067	2.3915	1.545	1280	1527	1556	95	86	56	-3.84522	1.21815e-167	1.30773e-165	down	Chr5	12724185	12729621	-	PmuVar_Chr5_1117	--	K13430 serine/threonine-protein kinase PBS1 [EC:2.7.11.1] | (RefSeq) serine/threonine-protein kinase PBS1 (A)	ko04626: Plant-pathogen interaction	hypothetical protein GBA52_008146 [Prunus armeniaca]	LRK10_WHEAT RecName: Full=Rust resistance kinase Lr10 {ECO:0000312|EMBL:AAC49629.1}; EC=2.7.11.1; AltName: Full=Probable receptor-like serine/threonine-protein kinase LRK10; Flags: Precursor;	A0A251QD45_PRUPE RecName: Full=Non-specific serine/threonine protein kinase {ECO:0000256|ARBA:ARBA00012513}; EC=2.7.11.1 {ECO:0000256|ARBA:ARBA00012513};	Serine/threonine protein kinase	GO:0016021,integral component of membrane; GO:0005886,plasma membrane; GO:0005524,ATP binding; GO:0106310,protein serine kinase activity; GO:0004674,protein serine/threonine kinase activity; GO:0006468,protein phosphorylation; GO:0000166,nucleotide binding; GO:0003674,molecular_function; GO:0005488,binding; GO:0017076,purine nucleotide binding; GO:0030554,adenyl nucleotide binding; GO:0032553,rib…	PF00069.28:Protein kinase domain	--	--	--
PmuVar_Chr2_0609	786.826	790.272	785.071	1897.62	1893.6	1999.35	75292	85988	84219	212592	177208	188587	1.59601	2.80926e-167	2.99506e-165	up	Chr2	5419267	5432801	-	PmuVar_Chr2_0609	--	K01626 3-deoxy-7-phosphoheptulonate synthase [EC:2.5.1.54] | (RefSeq) phospho-2-dehydro-3-deoxyheptonate aldolase 1, chloroplastic (A)	ko00400: Phenylalanine, tyrosine and tryptophan biosynthesis; ko01100: Metabolic pathways; ko01110: Biosynthesis of secondary metabolites; ko01230: Biosynthesis of amino acids	hypothetical protein GBA52_000685 [Prunus armeniaca]	JMJ21_ARATH RecName: Full=Lysine-specific demethylase JMJ21 {ECO:0000303|PubMed:18713399}; EC=1.14.11.- {ECO:0000250|UniProtKB:O64752}; AltName: Full=F-box protein JMJ21 {ECO:0000305}; AltName: Full=Jumonji domain-containing protein 21 {ECO:0000303|PubMed:18713399}; Short=AtJMJ21 {ECO:0000303|PubMed:18713399}; Short=Protein JUMONJI 21 {ECO:0000303|PubMed:18713399}; AltName: Full=Lysine-specific h…	A0A6J5W846_PRUAR SubName: Full=Uncharacterized protein {ECO:0000313|EMBL:CAB4297676.1};	Phosphatidylserine-specific receptor PtdSerR, contains JmjC domain	GO:0005737,cytoplasm; GO:0005575,cellular_component; GO:0005622,intracellular anatomical structure; GO:0110165,cellular anatomical entity	PF01474.19:Class-II DAHP synthetase family	Jumonji	TR	Jumonji
PmuVar_Chr6_0015	15.6372	16.5609	17.2741	1.3488	1.2748	1.2527	1317	1586	1631	133	105	104	-3.36924	6.90892e-167	7.31541e-165	down	Chr6	309640	320831	-	PmuVar_Chr6_0015	--	--	--	hypothetical protein GBA52_026078 [Prunus armeniaca]	NAC17_ARATH RecName: Full=NAC domain-containing protein 17 {ECO:0000303|PubMed:15029955}; Short=ANAC017 {ECO:0000303|PubMed:15029955}; AltName: Full=Protein NTM1-like 7 {ECO:0000303|PubMed:17158162}; AltName: Full=Protein REGULATORS OF AOX1A 2 {ECO:0000303|PubMed:24045017};	A0A251MT23_PRUPE SubName: Full=Uncharacterized protein {ECO:0000313|EMBL:ONH90302.1};	--	GO:0005789,endoplasmic reticulum membrane; GO:0016021,integral component of membrane; GO:0005634,nucleus; GO:0003700,DNA-binding transcription factor activity; GO:0000976,transcription regulatory region sequence-specific DNA binding; GO:0070301,cellular response to hydrogen peroxide; GO:0010150,leaf senescence; GO:0031930,mitochondria-nucleus signaling pathway; GO:0045893,positive regulation of t…	--	NAC	TF	NAC
PmuVar_Chr3_0089	233.613	237.62	245.621	63.3372	66.8414	63.9932	14388	16641	16959	4567	4026	3885	-1.58272	1.07153e-166	1.12685e-164	down	Chr3	500655	506089	-	PmuVar_Chr3_0089	--	K14445 solute carrier family 13 (sodium-dependent dicarboxylate transporter), member 2/3/5 | (RefSeq) tonoplast dicarboxylate transporter-like (A)	--	tonoplast dicarboxylate transporter [Prunus dulcis]	TDT_ARATH RecName: Full=Tonoplast dicarboxylate transporter; Short=AttDT; AltName: Full=Sodium-dicarboxylate cotransporter-like; Short=AtSDAT; AltName: Full=Vacuolar malate transporter;	A0A4Y1R8Z7_PRUDU SubName: Full=Tonoplast dicarboxylate transporter {ECO:0000313|EMBL:BBH00659.1};	Na+/dicarboxylate, Na+/tricarboxylate and phosphate transporters	GO:0016021,integral component of membrane; GO:0005774,vacuolar membrane; GO:0005773,vacuole; GO:0015140,malate transmembrane transporter activity; GO:0098656,anion transmembrane transport; GO:0015743,malate transport; GO:0051453,regulation of intracellular pH; GO:0003674,molecular_function; GO:0005215,transporter activity; GO:0005310,dicarboxylic acid transmembrane transporter activity; GO:000534…	PF00939.22:Sodium:sulfate symporter transmembrane region	--	--	--
PmuVar_Chr2_0918	3.6334	3.0432	4.1092	27.063	28.4175	31.156	168	160	213	1465	1285	1420	3.30954	1.22801e-165	1.28269e-163	up	Chr2	7621603	7624996	+	PmuVar_Chr2_0918	--	K13436 pto-interacting protein 1 [EC:2.7.11.1] | (RefSeq) pto-interacting protein 1 (A)	ko04626: Plant-pathogen interaction	PREDICTED: probable receptor-like serine/threonine-protein kinase At5g57670 [Prunus mume]	STU_ARATH RecName: Full=Protein kinase STUNTED {ECO:0000303|PubMed:22492352}; EC=2.7.11.- {ECO:0000255|PROSITE-ProRule:PRU00159};	A0A6J5W604_PRUAR RecName: Full=Protein kinase domain-containing protein {ECO:0000259|PROSITE:PS50011};	--	GO:0005737,cytoplasm; GO:0005886,plasma membrane; GO:0005524,ATP binding; GO:0016787,hydrolase activity; GO:0004674,protein serine/threonine kinase activity; GO:0004714,transmembrane receptor protein tyrosine kinase activity; GO:0009740,gibberellic acid mediated signaling pathway; GO:0010476,gibberellin mediated signaling pathway; GO:0051781,positive regulation of cell division; GO:0006468,protei…	PF00069.28:Protein kinase domain	--	--	--
PmuVar_Chr3_2831	1.8959	2.1804	1.9514	180.254	174.48	142.185	13	17	15	1447	1170	961	6.66385	1.55985e-165	1.61837e-163	up	Chr3	22138037	22139247	+	PmuVar_Chr3_2831	--	--	--	protein GAST1 [Prunus persica]	GAST1_SOLLC RecName: Full=Protein GAST1; Flags: Precursor;	A0A314XKU9_PRUYE SubName: Full=Protein GAST1 {ECO:0000313|EMBL:PQP92013.1};	--	GO:0005576,extracellular region; GO:0005575,cellular_component; GO:0110165,cellular anatomical entity	PF02704.17:Gibberellin regulated protein	--	--	--
PmuVar_Chr4_1941	33.0735	32.7345	34.2114	106.073	117.073	109.763	877	987	1017	3293	3036	2869	2.03598	4.12772e-164	4.25403e-162	up	Chr4	16944003	16945407	-	PmuVar_Chr4_1941	--	K15400 omega-hydroxypalmitate O-feruloyl transferase [EC:2.3.1.188] | (RefSeq) omega-hydroxypalmitate O-feruloyl transferase-like (A)	ko00073: Cutin, suberine and wax biosynthesis	PREDICTED: omega-hydroxypalmitate O-feruloyl transferase-like [Prunus mume]	HHT1_ARATH RecName: Full=Omega-hydroxypalmitate O-feruloyl transferase; EC=2.3.1.188; AltName: Full=Omega-hydroxyacid hydroxycinnamoyltransferase; AltName: Full=Protein ALIPHATIC SUBERIN FERULOYL TRANSFERASE;	A0A6J5WZN7_PRUAR SubName: Full=Uncharacterized protein {ECO:0000313|EMBL:CAB4305853.1};	--	GO:0016747,transferase activity, transferring acyl groups other than amino-acyl groups; GO:0050734,hydroxycinnamoyltransferase activity; GO:0102406,omega-hydroxypalmitate O-sinapoyl transferase activity; GO:0052325,cell wall pectin biosynthetic process; GO:0010345,suberin biosynthetic process; GO:0003674,molecular_function; GO:0003824,catalytic activity; GO:0016740,transferase activity; GO:001674…	PF02458.18:Transferase family	--	--	--
PmuVar_Chr6_1318	8.6496	9.7103	6.0205	388.265	358.705	428.31	264	337	206	13874	10707	12886	5.89297	1.06363e-162	1.08892e-160	up	Chr6	10393750	10398089	-	PmuVar_Chr6_1318	--	K01728 pectate lyase [EC:4.2.2.2] | (RefSeq) probable pectate lyase 8 (A)	ko00040: Pentose and glucuronate interconversions; ko01100: Metabolic pathways	unnamed protein product [Prunus armeniaca]	PLY20_ARATH RecName: Full=Probable pectate lyase 20; EC=4.2.2.2; Flags: Precursor;	A0A6J5VSH9_PRUAR RecName: Full=Pectate lyase {ECO:0000256|ARBA:ARBA00012272, ECO:0000256|RuleBase:RU361123}; EC=4.2.2.2 {ECO:0000256|ARBA:ARBA00012272, ECO:0000256|RuleBase:RU361123};	--	GO:0046872,metal ion binding; GO:0030570,pectate lyase activity; GO:0045490,pectin catabolic process; GO:0003674,molecular_function; GO:0005488,binding; GO:0043167,ion binding; GO:0043169,cation binding; GO:0003824,catalytic activity; GO:0016829,lyase activity; GO:0016835,carbon-oxygen lyase activity; GO:0016837,carbon-oxygen lyase activity, acting on polysaccharides; GO:0000272,polysaccharide ca…	PF00544.22:Pectate lyase	--	--	--
PmuVar_Chr4_2383	7.9015	7.0978	7.3502	39.5057	45.2162	39.1635	280	286	292	1639	1567	1368	2.77244	3.29919e-162	3.3554e-160	up	Chr4	19398340	19400990	+	PmuVar_Chr4_2383	--	--	--	PREDICTED: uncharacterized protein LOC103330051 [Prunus mume]	EDR2_ARATH RecName: Full=Protein ENHANCED DISEASE RESISTANCE 2;	A0A5E4EX62_PRUDU SubName: Full=PREDICTED: ENHANCED DISEASE RESISTANCE {ECO:0000313|EMBL:VVA20062.1};	--	GO:0005789,endoplasmic reticulum membrane; GO:0010008,endosome membrane; GO:0016021,integral component of membrane; GO:0005886,plasma membrane; GO:0070273,phosphatidylinositol-4-phosphate binding; GO:0009873,ethylene-activated signaling pathway; GO:1900056,negative regulation of leaf senescence; GO:0009626,plant-type hypersensitive response; GO:1900150,regulation of defense response to fungus; GO…	PF07059.15:Protein ENHANCED DISEASE RESISTANCE 2, C-terminal	--	--	--
PmuVar_Chr1_2003	0.1473	0.0498	0.0607	20.9985	28.4528	23.5606	13	5	6	2169	2455	2049	8.48402	7.39733e-162	7.47421e-160	up	Chr1	16817171	16824437	+	PmuVar_Chr1_2003	--	K05681 ATP-binding cassette, subfamily G (WHITE), member 2 | (RefSeq) ABC transporter G family member 9-like (A)	ko02010: ABC transporters	PREDICTED: pleiotropic drug resistance protein 3-like [Prunus mume]	PDR3_TOBAC RecName: Full=Pleiotropic drug resistance protein 3; AltName: Full=NtPDR3;	A0A6P5TRX0_PRUAV SubName: Full=pleiotropic drug resistance protein 3-like isoform X2 {ECO:0000313|RefSeq:XP_021830418.1};	Pleiotropic drug resistance proteins (PDR1-15), ABC superfamily	GO:0016021,integral component of membrane; GO:0140359,ABC-type transporter activity; GO:0005524,ATP binding; GO:0003674,molecular_function; GO:0003824,catalytic activity; GO:0005215,transporter activity; GO:0015399,primary active transmembrane transporter activity; GO:0016462,pyrophosphatase activity; GO:0016787,hydrolase activity; GO:0016817,hydrolase activity, acting on acid anhydrides; GO:0016…	PF01061.27:ABC-2 type transporter	--	--	--
PmuVar_Chr8_1583	97.5746	95.1498	94.4176	251.403	274.556	275.387	2913	3230	3160	8787	8016	8104	1.78225	1.10017e-161	1.10439e-159	up	Chr8	9344277	9345752	+	PmuVar_Chr8_1583	--	K22771 flavonol-3-O-L-rhamnoside-7-O-glucosyltransferase [EC:2.4.1.-] | (RefSeq) UDP-glycosyltransferase 73C6-like (A)	ko00944: Flavone and flavonol biosynthesis	PREDICTED: UDP-glycosyltransferase 73C6-like [Prunus mume]	73C12_BARVU RecName: Full=UDP-glycosyltransferase 73C12 {ECO:0000303|PubMed:23027665}; EC=2.4.1.368 {ECO:0000269|PubMed:23027665}; AltName: Full=Oleanolate 3-O-glucosyltransferase UGT73C12 {ECO:0000305};	A0A6J5Y2I6_PRUAR RecName: Full=Glycosyltransferase {ECO:0000256|RuleBase:RU362057}; EC=2.4.1.- {ECO:0000256|RuleBase:RU362057};	UDP-glucuronosyl and UDP-glucosyl transferase	GO:0035251,UDP-glucosyltransferase activity; GO:0016134,saponin metabolic process; GO:0003674,molecular_function; GO:0003824,catalytic activity; GO:0008194,UDP-glycosyltransferase activity; GO:0016740,transferase activity; GO:0016757,transferase activity, transferring glycosyl groups; GO:0016758,transferase activity, transferring hexosyl groups; GO:0046527,glucosyltransferase activity; GO:0008150…	PF00201.21:UDP-glucoronosyl and UDP-glucosyl transferase	--	--	--
PmuVar_Chr2_3129	0.5728	0.893	0.9522	28.6422	21.5369	29.4232	22	39	41	1288	809	1114	5.33582	1.09339e-160	1.0905e-158	up	Chr2	21853908	21855960	-	PmuVar_Chr2_3129	--	--	--	PREDICTED: polygalacturonase 1 beta-like protein 3 [Prunus mume]	PGL3_ARATH RecName: Full=Polygalacturonase 1 beta-like protein 3 {ECO:0000303|PubMed:26106400}; Short=AtPGL3 {ECO:0000303|PubMed:26106400}; AltName: Full=Aromatic-rich glycoprotein JP650; AltName: Full=PG1beta-like protein 3 {ECO:0000303|PubMed:26106400}; AltName: Full=Polygalacturonase 2 {ECO:0000303|PubMed:19639386}; AltName: Full=Probable polygalacturonase non-catalytic subunit JP650; Flags: P…	A0A6J5W4X4_PRUAR RecName: Full=BURP domain-containing protein {ECO:0000259|PROSITE:PS51277};	--	GO:0048046,apoplast; GO:0009505,plant-type cell wall; GO:0042547,cell wall modification involved in multidimensional cell growth; GO:0009827,plant-type cell wall modification; GO:0008150,biological_process; GO:0009825,multidimensional cell growth; GO:0009987,cellular process; GO:0016043,cellular component organization; GO:0016049,cell growth; GO:0040007,growth; GO:0042545,cell wall modification; …	PF03181.18:BURP domain	--	--	--
PmuVar_Chr2_1213	0.5224	0.4177	0.6778	18.6402	19.2796	20.7662	22	20	32	919	794	862	5.48346	2.70734e-160	2.68287e-158	up	Chr2	9684156	9687154	-	PmuVar_Chr2_1213	--	K20887 xyloglucan glycosyltransferase 4 [EC:2.4.1.-] | (RefSeq) xyloglucan glycosyltransferase 4 (A)	--	unnamed protein product [Prunus armeniaca]	CSLC5_ARATH RecName: Full=Probable xyloglucan glycosyltransferase 5 {ECO:0000303|PubMed:11027699}; EC=2.4.1.- {ECO:0000250|UniProtKB:Q9LJP4}; AltName: Full=Cellulose synthase-like protein C5 {ECO:0000303|PubMed:11027699}; Short=AtCslC5 {ECO:0000303|PubMed:11027699};	A0A6J5TRT4_PRUAR RecName: Full=Glyco_trans_2-like domain-containing protein {ECO:0000259|Pfam:PF13632};	--	GO:0005794,Golgi apparatus; GO:0000139,Golgi membrane; GO:0016021,integral component of membrane; GO:0016757,transferase activity, transferring glycosyl groups; GO:0042803,protein homodimerization activity; GO:0071555,cell wall organization; GO:0099402,plant organ development; GO:0048868,pollen tube development; GO:0003674,molecular_function; GO:0003824,catalytic activity; GO:0016740,transferase …	PF13632.9:Glycosyl transferase family group 2	--	--	--
PmuVar_Chr1_1169	79.9488	80.6415	78.945	334.767	284.317	338.544	1402	1608	1552	6873	4876	5852	2.30318	7.76384e-160	7.64466e-158	up	Chr1	11832530	11833985	+	PmuVar_Chr1_1169	--	--	--	hypothetical protein GBA52_019715 [Prunus armeniaca]	--	A0A314Z7D8_PRUYE SubName: Full=Lysine-rich arabinogalactan protein 19 {ECO:0000313|EMBL:PQQ14610.1};	--	GO:0005886,plasma membrane; GO:0005575,cellular_component; GO:0016020,membrane; GO:0071944,cell periphery; GO:0110165,cellular anatomical entity	--	--	--	--
PmuVar_Chr7_0031	80.6661	91.622	72.6856	3.1693	3.4984	5.133	1674	2162	1691	77	71	105	-4.08169	1.10958e-159	1.08563e-157	down	Chr7	477411	478721	-	PmuVar_Chr7_0031	--	K05277 anthocyanidin synthase [EC:1.14.20.4] | (RefSeq) leucoanthocyanidin dioxygenase (A)	ko00941: Flavonoid biosynthesis; ko01100: Metabolic pathways; ko01110: Biosynthesis of secondary metabolites	PREDICTED: leucoanthocyanidin dioxygenase [Prunus mume]	LDOX_MALDO RecName: Full=Leucoanthocyanidin dioxygenase; Short=LDOX; Short=Leucocyanidin oxygenase; EC=1.14.20.4 {ECO:0000250|UniProtKB:Q96323}; AltName: Full=Anthocyanidin synthase; AltName: Full=Leucoanthocyanidin hydroxylase;	G3LUT1_9ROSA SubName: Full=Anthocyanidin synthase {ECO:0000313|EMBL:AEN19292.1};	Iron/ascorbate family oxidoreductases	GO:0031418,L-ascorbic acid binding; GO:0050589,leucocyanidin oxygenase activity; GO:0046872,metal ion binding; GO:0009718,anthocyanin-containing compound biosynthetic process; GO:0003674,molecular_function; GO:0005488,binding; GO:0019842,vitamin binding; GO:0030246,carbohydrate binding; GO:0031406,carboxylic acid binding; GO:0036094,small molecule binding; GO:0043167,ion binding; GO:0043168,anion…	PF14226.9:non-haem dioxygenase in morphine synthesis N-terminal	--	--	--
PmuVar_Chr6_0483	156.506	159.169	158.726	31.7896	34.3034	29.2302	4264	4931	4848	1014	914	785	-2.01423	5.19128e-159	5.04729e-157	down	Chr6	4542620	4545874	+	PmuVar_Chr6_0483	--	K00688 glycogen phosphorylase [EC:2.4.1.1] | (RefSeq) glycogen phosphorylase 1-like isoform X1 (A)	ko00500: Starch and sucrose metabolism; ko01100: Metabolic pathways; ko01110: Biosynthesis of secondary metabolites	PREDICTED: ACT domain-containing protein ACR3 isoform X2 [Prunus mume]	ACR3_ARATH RecName: Full=ACT domain-containing protein ACR3 {ECO:0000305}; AltName: Full=Protein ACT DOMAIN REPEATS 3 {ECO:0000303|PubMed:12481063};	A0A6J5VP42_PRUAR SubName: Full=Uncharacterized protein {ECO:0000313|EMBL:CAB4289085.1};	--	GO:0005829,cytosol; GO:0016597,amino acid binding; GO:0003674,molecular_function; GO:0005488,binding; GO:0031406,carboxylic acid binding; GO:0043167,ion binding; GO:0043168,anion binding; GO:0005575,cellular_component; GO:0005622,intracellular anatomical structure; GO:0005737,cytoplasm; GO:0110165,cellular anatomical entity	PF01842.28:ACT domain	--	--	--
PmuVar_scaffold18_0042	352.145	317.855	308.625	1221.66	1070.16	1121.99	3718	3816	3653	15101	11050	11677	2.10541	9.16424e-159	8.85437e-157	up	scaffold18	365523	367840	+	PmuVar_scaffold18_0042	--	--	--	hypothetical protein GBA52_020461 [Prunus armeniaca]	LTPG2_ARATH RecName: Full=Non-specific lipid transfer protein GPI-anchored 2 {ECO:0000303|PubMed:22891199, ECO:0000303|PubMed:23893219}; Short=AtLTPG-2 {ECO:0000303|PubMed:22891199, ECO:0000303|PubMed:23893219}; Short=Protein LTP-GPI-ANCHORED 2 {ECO:0000303|PubMed:22891199, ECO:0000303|PubMed:23893219}; AltName: Full=Xylogen-like protein 10 {ECO:0000303|PubMed:21558309}; Short=AtXYLP10 {ECO:00003…	A0A6J5XI27_PRUAR RecName: Full=AAI domain-containing protein {ECO:0000259|SMART:SM00499};	--	GO:0031225,anchored component of membrane; GO:0046658,anchored component of plasma membrane; GO:0005886,plasma membrane; GO:0008289,lipid binding; GO:0042335,cuticle development; GO:0050832,defense response to fungus; GO:0006869,lipid transport; GO:0003674,molecular_function; GO:0005488,binding; GO:0007275,multicellular organism development; GO:0008150,biological_process; GO:0032501,multicellular…	PF14368.9:Probable lipid transfer	--	--	--
PmuVar_Chr1_0996	17.0265	17.1759	19.8578	93.4414	111.49	87.2433	374	429	489	2403	2395	1889	2.73363	3.1648e-158	3.0388e-156	up	Chr1	10476248	10540763	-	PmuVar_Chr1_0996	--	K00083 cinnamyl-alcohol dehydrogenase [EC:1.1.1.195] | (RefSeq) probable mannitol dehydrogenase (A)	ko00940: Phenylpropanoid biosynthesis; ko01100: Metabolic pathways; ko01110: Biosynthesis of secondary metabolites	PREDICTED: probable mannitol dehydrogenase [Prunus mume]	MTDH_FRAAN RecName: Full=Probable mannitol dehydrogenase; EC=1.1.1.255; AltName: Full=NAD-dependent mannitol dehydrogenase;	A0A6J5V4R6_PRUAR RecName: Full=PKS_ER domain-containing protein {ECO:0000259|SMART:SM00829};	Alcohol dehydrogenase, class V	GO:0046029,mannitol dehydrogenase activity; GO:0008270,zinc ion binding; GO:0071704,organic substance metabolic process; GO:0003674,molecular_function; GO:0003824,catalytic activity; GO:0016491,oxidoreductase activity; GO:0016614,oxidoreductase activity, acting on CH-OH group of donors; GO:0016616,oxidoreductase activity, acting on the CH-OH group of donors, NAD or NADP as acceptor; GO:0031320,he…	PF08240.15:Alcohol dehydrogenase GroES-like domain	--	--	--
PmuVar_Chr2_0510	11.4242	12.2532	10.9135	76.7448	63.3015	67.1498	296	361	317	2328	1604	1715	2.88588	4.48373e-158	4.27864e-156	up	Chr2	4606048	4608095	+	PmuVar_Chr2_0510	--	K13065 shikimate O-hydroxycinnamoyltransferase [EC:2.3.1.133] | (RefSeq) shikimate O-hydroxycinnamoyltransferase-like (A)	ko00940: Phenylpropanoid biosynthesis; ko00941: Flavonoid biosynthesis; ko00945: Stilbenoid, diarylheptanoid and gingerol biosynthesis; ko01100: Metabolic pathways; ko01110: Biosynthesis of secondary metabolites	PREDICTED: protein ECERIFERUM 1 [Prunus mume]	CER2_ARATH RecName: Full=Protein ECERIFERUM 2;	A0A6J5WEM3_PRUAR SubName: Full=Uncharacterized protein {ECO:0000313|EMBL:CAB4297794.1};	--	GO:0005783,endoplasmic reticulum; GO:0005634,nucleus; GO:0016747,transferase activity, transferring acyl groups other than amino-acyl groups; GO:0071555,cell wall organization; GO:0009555,pollen development; GO:0042761,very long-chain fatty acid biosynthetic process; GO:0010025,wax biosynthetic process; GO:0003674,molecular_function; GO:0003824,catalytic activity; GO:0016740,transferase activity;…	PF02458.18:Transferase family	--	--	--
PmuVar_Chr8_2519	59.008	60.9252	60.0976	174.651	188.9	173.338	1178	1383	1345	4082	3688	3411	1.87728	2.85141e-157	2.70429e-155	up	Chr8	18111370	18114028	-	PmuVar_Chr8_2519	--	--	--	PREDICTED: F-box protein At2g26850-like isoform X2 [Prunus mume]	FB118_ARATH RecName: Full=F-box protein At2g26850;	A0A6J5VB91_PRUAR RecName: Full=F-box domain-containing protein {ECO:0000259|PROSITE:PS50181};	--	--	PF00646.36:F-box domain	--	--	--
PmuVar_Chr4_1008	7.6515	7.0742	7.5252	88.0618	78.3393	86.9783	78	82	86	1051	781	874	3.81447	2.77721e-156	2.61786e-154	up	Chr4	9914189	9914808	+	PmuVar_Chr4_1008	--	K09286 EREBP-like factor | (RefSeq) ethylene-responsive transcription factor 4 (A)	--	PREDICTED: ethylene-responsive transcription factor WIN1, partial [Prunus mume]	WIN1_ARATH RecName: Full=Ethylene-responsive transcription factor WIN1; AltName: Full=Protein SHINE 1; AltName: Full=Protein WAX INDUCER 1;	A0A6J5WP13_PRUAR RecName: Full=AP2/ERF domain-containing protein {ECO:0000259|PROSITE:PS51032};	--	GO:0005634,nucleus; GO:0003700,DNA-binding transcription factor activity; GO:0043565,sequence-specific DNA binding; GO:0010143,cutin biosynthetic process; GO:0009873,ethylene-activated signaling pathway; GO:0009414,response to water deprivation; GO:0010166,wax metabolic process; GO:0003674,molecular_function; GO:0140110,transcription regulator activity; GO:0003676,nucleic acid binding; GO:0003677…	PF00847.23:AP2 domain	AP2/ERF-ERF	TF	AP2/ERF->AP2/ERF-ERF
PmuVar_Chr8_0428	137.161	137.366	128.117	519.36	440.644	458.554	2630	2995	2754	11659	8263	8667	2.11974	3.28997e-156	3.0824e-154	up	Chr8	2471909	2473150	-	PmuVar_Chr8_0428	--	--	--	PREDICTED: uncharacterized protein LOC103341082 [Prunus mume]	--	A0A6J5VHR2_PRUAR SubName: Full=Uncharacterized protein {ECO:0000313|EMBL:CAB4288629.1};	--	--	PF13431.9:Tetratricopeptide repeat	--	--	--
PmuVar_Chr7_0043	133.857	117.146	131.458	16.9627	17.7001	16.8392	2258	2247	2486	335	292	280	-2.59063	8.09714e-156	7.54059e-154	down	Chr7	566313	567558	-	PmuVar_Chr7_0043	--	K22013 magnesium dechelatase [EC:4.99.1.10] | (RefSeq) protein STAY-GREEN, chloroplastic-like (A)	ko00860: Porphyrin metabolism; ko01110: Biosynthesis of secondary metabolites	PREDICTED: protein STAY-GREEN, chloroplastic-like [Prunus mume]	SGR_CAPAN RecName: Full=Protein STAY-GREEN homolog, chloroplastic {ECO:0000305}; Short=CaSGR {ECO:0000303|PubMed:18427769}; AltName: Full=Protein CHLOROPHYLL RETAINER {ECO:0000303|PubMed:18359841}; Flags: Precursor;	M5WMZ9_PRUPE RecName: Full=Staygreen domain-containing protein {ECO:0000259|Pfam:PF12638};	--	GO:0009507,chloroplast; GO:0015996,chlorophyll catabolic process; GO:0006725,cellular aromatic compound metabolic process; GO:0006778,porphyrin-containing compound metabolic process; GO:0006787,porphyrin-containing compound catabolic process; GO:0006807,nitrogen compound metabolic process; GO:0008150,biological_process; GO:0008152,metabolic process; GO:0009056,catabolic process; GO:0009987,cellul…	PF12638.10:Staygreen protein	--	--	--
PmuVar_Chr2_0422	71.554	77.6059	80.6184	227.794	220.858	233.391	2045	2522	2583	7622	6173	6575	1.87221	1.49949e-155	1.38806e-153	up	Chr2	3730912	3735508	-	PmuVar_Chr2_0422	--	K24917 amino acid permease | (RefSeq) amino acid permease 6-like isoform X2 (A)	--	hypothetical protein GBA52_000501 [Prunus armeniaca]	AAP6_ARATH RecName: Full=Amino acid permease 6; AltName: Full=Amino acid transporter AAP6;	A0A6J5W8H7_PRUAR RecName: Full=Aa_trans domain-containing protein {ECO:0000259|Pfam:PF01490};	Amino acid transporters	GO:0016021,integral component of membrane; GO:0016020,membrane; GO:0005886,plasma membrane; GO:0015172,acidic amino acid transmembrane transporter activity; GO:0015171,amino acid transmembrane transporter activity; GO:0015175,neutral amino acid transmembrane transporter activity; GO:0015293,symporter activity; GO:0015800,acidic amino acid transport; GO:0003333,amino acid transmembrane transport; …	PF01490.21:Transmembrane amino acid transporter protein	--	--	--
PmuVar_Chr5_3282	0.2335	0.3521	0.2976	43.1698	45.267	44.8094	7	12	10	1515	1327	1324	7.52737	8.10385e-155	7.45699e-153	up	Chr5	28736616	28738659	+	PmuVar_Chr5_3282	--	K24544 cytochrome P450 family 714 subfamily C | (RefSeq) cytochrome P450 714C2-like (A)	--	PREDICTED: cytochrome P450 714C2-like [Prunus mume]	C14C2_ORYSJ RecName: Full=Cytochrome P450 714C2; EC=1.14.-.-;	A0A6J5WU19_PRUAR SubName: Full=Uncharacterized protein {ECO:0000313|EMBL:CAB4301858.1};	Cytochrome P450 CYP4/CYP19/CYP26 subfamilies	GO:0016021,integral component of membrane; GO:0020037,heme binding; GO:0005506,iron ion binding; GO:0004497,monooxygenase activity; GO:0016705,oxidoreductase activity, acting on paired donors, with incorporation or reduction of molecular oxygen; GO:0003674,molecular_function; GO:0005488,binding; GO:0046906,tetrapyrrole binding; GO:0097159,organic cyclic compound binding; GO:1901363,heterocyclic c…	PF00067.25:Cytochrome P450	--	--	--
PmuVar_Chr6_1322	95.2039	94.2218	93.0929	236.159	236.707	232.81	2848	3205	3122	8271	6925	6865	1.62263	1.20853e-154	1.10548e-152	up	Chr6	10420462	10423547	+	PmuVar_Chr6_1322	--	K07513 acetyl-CoA acyltransferase 1 [EC:2.3.1.16] | (RefSeq) 3-ketoacyl-CoA thiolase 2, peroxisomal (A)	ko00071: Fatty acid degradation; ko00280: Valine, leucine and isoleucine degradation; ko00592: alpha-Linolenic acid metabolism; ko01040: Biosynthesis of unsaturated fatty acids; ko01100: Metabolic pathways; ko01110: Biosynthesis of secondary metabolites; ko01212: Fatty acid metabolism; ko04146: Peroxisome	PREDICTED: 3-ketoacyl-CoA thiolase 2, peroxisomal [Prunus mume]	KAT1_PETHY RecName: Full=3-ketoacyl CoA thiolase 1, peroxisomal {ECO:0000303|PubMed:19659733}; Short=PhKAT1 {ECO:0000303|PubMed:19659733}; EC=2.3.1.16; Flags: Precursor;	A0A6J5VZE8_PRUAR SubName: Full=Uncharacterized protein {ECO:0000313|EMBL:CAB4291318.1};	3-oxoacyl CoA thiolase	GO:0005777,peroxisome; GO:0003988,acetyl-CoA C-acyltransferase activity; GO:0019438,aromatic compound biosynthetic process; GO:0010597,green leaf volatile biosynthetic process; GO:0003674,molecular_function; GO:0003824,catalytic activity; GO:0016408,C-acyltransferase activity; GO:0016740,transferase activity; GO:0016746,transferase activity, transferring acyl groups; GO:0016747,transferase activi…	PF00108.26:Thiolase, N-terminal domain	--	--	--
PmuVar_Chr3_0206	1097.63	1060.08	1018.61	276.155	291.122	268.871	21979	24137	22866	6474	5701	5307	-1.62456	2.55472e-154	2.32314e-152	down	Chr3	1169553	1171167	+	PmuVar_Chr3_0206	--	K00430 peroxidase [EC:1.11.1.7] | (RefSeq) peroxidase 42 (A)	ko00940: Phenylpropanoid biosynthesis; ko01100: Metabolic pathways; ko01110: Biosynthesis of secondary metabolites	unnamed protein product [Prunus armeniaca]	PER42_ARATH RecName: Full=Peroxidase 42; Short=Atperox P42; EC=1.11.1.7; AltName: Full=ATP1a/ATP1b; AltName: Full=PRXR1; Flags: Precursor;	A0A6J5WWS7_PRUAR RecName: Full=Peroxidase {ECO:0000256|ARBA:ARBA00012313, ECO:0000256|RuleBase:RU362060}; EC=1.11.1.7 {ECO:0000256|ARBA:ARBA00012313, ECO:0000256|RuleBase:RU362060};	--	GO:0005576,extracellular region; GO:0009505,plant-type cell wall; GO:0020037,heme binding; GO:0046872,metal ion binding; GO:0004601,peroxidase activity; GO:0042744,hydrogen peroxide catabolic process; GO:0006979,response to oxidative stress; GO:0048511,rhythmic process; GO:0003674,molecular_function; GO:0005488,binding; GO:0046906,tetrapyrrole binding; GO:0097159,organic cyclic compound binding; …	PF00141.26:Peroxidase	--	--	--
PmuVar_Chr1_2477	209.858	199.749	206.867	478.082	496.686	457.44	7946	8600	8781	21193	18392	17073	1.51758	1.47732e-153	1.33555e-151	up	Chr1	19558518	19563343	+	PmuVar_Chr1_2477	--	K09422 transcription factor MYB, plant | (RefSeq) transcription factor MYB90-like (A)	--	uncharacterized protein Pyn_39585 [Prunus yedoensis var. nudiflora]	MY113_ARATH RecName: Full=Transcription factor MYB113; AltName: Full=Myb-related protein 113; Short=AtMYB113;	A0A314ZA25_PRUYE SubName: Full=Uncharacterized protein {ECO:0000313|EMBL:PQQ14887.1};	--	GO:0005634,nucleus; GO:0003677,DNA binding; GO:0003700,DNA-binding transcription factor activity; GO:0031540,regulation of anthocyanin biosynthetic process; GO:0006355,regulation of transcription, DNA-templated; GO:0003674,molecular_function; GO:0003676,nucleic acid binding; GO:0005488,binding; GO:0097159,organic cyclic compound binding; GO:1901363,heterocyclic compound binding; GO:0140110,transc…	PF00249.34:Myb-like DNA-binding domain	MYB-related	TF	MYB->MYB-related
PmuVar_Chr6_2576	6.1362	6.1674	6.5683	138.818	123.876	125.748	35	40	42	927	691	707	4.66622	2.13546e-153	1.91931e-151	up	Chr6	19377025	19377306	+	PmuVar_Chr6_2576	--	K14488 SAUR family protein | (RefSeq) indole-3-acetic acid-induced protein ARG7-like (A)	ko04075: Plant hormone signal transduction	indole-3-acetic acid-induced protein ARG7 [Prunus persica]	ARG7_VIGRR RecName: Full=Indole-3-acetic acid-induced protein ARG7;	M5W1D5_PRUPE SubName: Full=Uncharacterized protein {ECO:0000313|EMBL:EMJ00600.1};	--	GO:0009733,response to auxin; GO:0008150,biological_process; GO:0009719,response to endogenous stimulus; GO:0009725,response to hormone; GO:0010033,response to organic substance; GO:0042221,response to chemical; GO:0050896,response to stimulus	PF02519.17:Auxin responsive protein	--	--	--
novel.31	70.1864	70.8359	72.2497	179.6	177.157	180.011	2649	3040	3057	7936	6539	6697	1.63393	4.5689e-152	4.0827e-150	up	Chr1	7513636	7518451	+	--	--	K15849 bifunctional aspartate aminotransferase and glutamate/aspartate-prephenate aminotransferase [EC:2.6.1.1 2.6.1.78 2.6.1.79] | (RefSeq) bifunctional aspartate aminotransferase and glutamate/aspartate-prephenate aminotransferase (A)	ko00350: Tyrosine metabolism; ko00360: Phenylalanine metabolism; ko00400: Phenylalanine, tyrosine and tryptophan biosynthesis; ko00950: Isoquinoline alkaloid biosynthesis; ko00960: Tropane, piperidine and pyridine alkaloid biosynthesis; ko01100: Metabolic pathways; ko01110: Biosynthesis of secondary metabolites; ko01230: Biosynthesis of amino acids	Aminotran 1 2 domain-containing protein [Citrus sinensis]	PAT_PETHY RecName: Full=Bifunctional aspartate aminotransferase and glutamate/aspartate-prephenate aminotransferase {ECO:0000303|PubMed:21102469}; Short=PhPPA-AT {ECO:0000303|PubMed:21102469}; EC=2.6.1.1 {ECO:0000269|PubMed:21102469}; EC=2.6.1.78 {ECO:0000269|PubMed:21102469}; EC=2.6.1.79 {ECO:0000269|PubMed:21102469}; Flags: Precursor;	A0A2H5QDD9_CITUN SubName: Full=Uncharacterized protein {ECO:0000313|EMBL:GAY62245.1};	Kynurenine aminotransferase, glutamine transaminase K	GO:0009507,chloroplast; GO:0033853,aspartate-prephenate aminotransferase activity; GO:0033854,glutamate-prephenate aminotransferase activity; GO:0042802,identical protein binding; GO:0004069,L-aspartate:2-oxoglutarate aminotransferase activity; GO:0030170,pyridoxal phosphate binding; GO:0009095,aromatic amino acid family biosynthetic process, prephenate pathway; GO:0009094,L-phenylalanine biosynt…	PF00155.24:Aminotransferase class I and II	--	--	--
PmuVar_Chr2_0439	12.6663	11.9624	13.2491	0.9788	1.127	1.269	1448	1555	1698	131	126	143	-3.19136	2.22029e-151	1.97261e-149	down	Chr2	3897714	3907281	-	PmuVar_Chr2_0439	--	K01610 phosphoenolpyruvate carboxykinase (ATP) [EC:4.1.1.49] | (RefSeq) phosphoenolpyruvate carboxykinase [ATP]-like (A)	ko00010: Glycolysis / Gluconeogenesis; ko00020: Citrate cycle (TCA cycle); ko00620: Pyruvate metabolism; ko00710: Carbon fixation in photosynthetic organisms; ko01100: Metabolic pathways; ko01110: Biosynthesis of secondary metabolites; ko01200: Carbon metabolism	PREDICTED: putative disease resistance protein RGA3 [Prunus mume]	PCKA_CUCSA RecName: Full=Phosphoenolpyruvate carboxykinase (ATP); Short=PEP carboxykinase; Short=PEPCK; EC=4.1.1.49;	A0A6J5WDZ9_PRUAR SubName: Full=Uncharacterized protein {ECO:0000313|EMBL:CAB4297872.1};	--	GO:0005737,cytoplasm; GO:0005524,ATP binding; GO:0004612,phosphoenolpyruvate carboxykinase (ATP) activity; GO:0006094,gluconeogenesis; GO:0000166,nucleotide binding; GO:0003674,molecular_function; GO:0005488,binding; GO:0017076,purine nucleotide binding; GO:0030554,adenyl nucleotide binding; GO:0032553,ribonucleotide binding; GO:0032555,purine ribonucleotide binding; GO:0032559,adenyl ribonucleot…	PF00931.25:NB-ARC domain	--	--	--
PmuVar_Chr3_0176	0.5897	0.737	0.8028	21.9233	25.6104	27.7389	19	27	29	827	807	881	5.43767	4.30129e-151	3.79964e-149	up	Chr3	911100	914973	-	PmuVar_Chr3_0176	--	K00423 L-ascorbate oxidase [EC:1.10.3.3] | (RefSeq) L-ascorbate oxidase homolog (A)	ko00053: Ascorbate and aldarate metabolism; ko01100: Metabolic pathways	PREDICTED: L-ascorbate oxidase homolog [Prunus mume]	ASOL_BRANA RecName: Full=L-ascorbate oxidase homolog; EC=1.10.3.-; Flags: Precursor;	A0A6J5WWJ9_PRUAR SubName: Full=Uncharacterized protein {ECO:0000313|EMBL:CAB4306146.1};	Multicopper oxidases	GO:0005576,extracellular region; GO:0005507,copper ion binding; GO:0016491,oxidoreductase activity; GO:0003674,molecular_function; GO:0005488,binding; GO:0043167,ion binding; GO:0043169,cation binding; GO:0046872,metal ion binding; GO:0046914,transition metal ion binding; GO:0003824,catalytic activity; GO:0005575,cellular_component; GO:0110165,cellular anatomical entity	PF00394.25:Multicopper oxidase	--	--	--
PmuVar_Chr4_2629	426.587	407.045	400.268	99.0188	102.028	105.819	12813	13902	13478	3482	2997	3133	-1.70576	1.82531e-150	1.60327e-148	down	Chr4	20877849	20880365	-	PmuVar_Chr4_2629	--	K00318 proline dehydrogenase [EC:1.5.5.2] | (RefSeq) proline dehydrogenase 2, mitochondrial (A)	ko00330: Arginine and proline metabolism; ko01100: Metabolic pathways; ko01110: Biosynthesis of secondary metabolites	PREDICTED: proline dehydrogenase 2, mitochondrial [Prunus mume]	PROD2_ARATH RecName: Full=Proline dehydrogenase 2, mitochondrial {ECO:0000303|PubMed:20403182}; EC=1.5.5.2 {ECO:0000305|PubMed:20403182}; AltName: Full=Osmotic stress-induced proline dehydrogenase; AltName: Full=Proline oxidase; Flags: Precursor;	A0A6J5UFG9_PRUAR RecName: Full=Proline dehydrogenase {ECO:0000256|ARBA:ARBA00012695, ECO:0000256|RuleBase:RU364054}; EC=1.5.5.2 {ECO:0000256|ARBA:ARBA00012695, ECO:0000256|RuleBase:RU364054};	Proline oxidase	GO:0005739,mitochondrion; GO:0071949,FAD binding; GO:0004657,proline dehydrogenase activity; GO:0006562,proline catabolic process; GO:0010133,proline catabolic process to glutamate; GO:0006970,response to osmotic stress; GO:0009414,response to water deprivation; GO:0000166,nucleotide binding; GO:0003674,molecular_function; GO:0005488,binding; GO:0036094,small molecule binding; GO:0043167,ion bind…	PF01619.21:Proline dehydrogenase	--	--	--
PmuVar_Chr8_1809	346.162	352.513	335.115	1139.46	994.077	1128.57	4432	5132	4810	17080	12447	14243	1.96117	8.93769e-150	7.80609e-148	up	Chr8	11032918	11033550	-	PmuVar_Chr8_1809	--	--	--	PREDICTED: protein YLS9-like [Prunus mume]	NHL1_ARATH RecName: Full=NDR1/HIN1-like protein 1 {ECO:0000303|Ref.1};	A0A6J5Y1Y6_PRUAR RecName: Full=LEA_2 domain-containing protein {ECO:0000259|Pfam:PF03168};	--	GO:0046658,anchored component of plasma membrane; GO:0016021,integral component of membrane; GO:0009506,plasmodesma; GO:0051607,defense response to virus; GO:0002252,immune effector process; GO:0002376,immune system process; GO:0006950,response to stress; GO:0006952,defense response; GO:0008150,biological_process; GO:0009605,response to external stimulus; GO:0009607,response to biotic stimulus; G…	PF03168.16:Late embryogenesis abundant protein	--	--	--
PmuVar_Chr8_0533	7.7193	8.3243	8.6618	67.9229	59.5439	89.1573	252	309	317	2596	1901	2869	3.43709	1.77077e-148	1.53788e-146	up	Chr8	2954801	2956414	+	PmuVar_Chr8_0533	--	K14494 DELLA protein | (RefSeq) LOW QUALITY PROTEIN: DELLA protein DWARF8-like (A)	ko04075: Plant hormone signal transduction	hypothetical protein GBA52_022566 [Prunus armeniaca]	SLRL1_ORYSJ RecName: Full=Protein SLENDER RICE1-LIKE 1 {ECO:0000303|PubMed:16262715}; Short=Protein SLR1-LIKE 1 {ECO:0000303|PubMed:16262715};	A0A6J5VMK1_PRUAR RecName: Full=DELLA domain-containing protein {ECO:0000259|Pfam:PF12041};	--	GO:0005634,nucleus; GO:0003700,DNA-binding transcription factor activity; GO:0043565,sequence-specific DNA binding; GO:0009740,gibberellic acid mediated signaling pathway; GO:0006355,regulation of transcription, DNA-templated; GO:0003674,molecular_function; GO:0140110,transcription regulator activity; GO:0003676,nucleic acid binding; GO:0003677,DNA binding; GO:0005488,binding; GO:0097159,organic …	PF03514.17:GRAS domain family	GRAS	TF	GRAS
PmuVar_Chr1_2046	10.8528	14.4934	12.1906	102.14	100.184	95.7261	108	164	136	1190	975	939	3.28716	2.0415e-148	1.76311e-146	up	Chr1	17068002	17068493	-	PmuVar_Chr1_2046	--	--	--	PREDICTED: uncharacterized protein LOC103344327 [Prunus mume]	--	M5W0H8_PRUPE SubName: Full=Uncharacterized protein {ECO:0000313|EMBL:EMJ07242.1};	--	--	PF04398.15:Protein of unknown function, DUF538	--	--	--
PmuVar_Chr2_1959	70.3358	64.5091	62.9741	5.4887	4.8275	6.4747	1609	1678	1615	147	108	146	-3.25557	4.7935e-148	4.11682e-146	down	Chr2	14193361	14195998	-	PmuVar_Chr2_1959	--	K08241 jasmonate O-methyltransferase [EC:2.1.1.141] | (RefSeq) jasmonate O-methyltransferase-like (A)	ko00592: alpha-Linolenic acid metabolism; ko01110: Biosynthesis of secondary metabolites	PREDICTED: jasmonate O-methyltransferase-like [Prunus mume]	JMT2_THECC RecName: Full=Probable jasmonic acid carboxyl methyltransferase 2 {ECO:0000312|EMBL:EOY14825.1}; EC=2.1.1.141 {ECO:0000250|UniProtKB:Q9AR07};	A0A6J5W726_PRUAR SubName: Full=Uncharacterized protein {ECO:0000313|EMBL:CAB4296283.1};	--	GO:0005737,cytoplasm; GO:0005634,nucleus; GO:0046872,metal ion binding; GO:0030795,methyl jasmonate methylesterase activity; GO:0008757,S-adenosylmethionine-dependent methyltransferase activity; GO:0032259,methylation; GO:0031408,oxylipin biosynthetic process; GO:0003674,molecular_function; GO:0005488,binding; GO:0043167,ion binding; GO:0043169,cation binding; GO:0003824,catalytic activity; GO:00…	PF03492.18:SAM dependent carboxyl methyltransferase	--	--	--
PmuVar_Chr4_0529	1.8432	2.7175	1.2573	48.8509	41.6852	48.3419	34	57	26	1055	752	879	4.87663	4.99736e-148	4.26819e-146	up	Chr4	5407825	5410094	+	PmuVar_Chr4_0529	--	K20557 transcription factor VIP1 | (RefSeq) transcription factor VIP1 (A)	ko04016: MAPK signaling pathway - plant	hypothetical protein GBA52_010347 [Prunus armeniaca]	BZP34_ARATH RecName: Full=Basic leucine zipper 34 {ECO:0000303|PubMed:11906833}; Short=AtbZIP34 {ECO:0000303|PubMed:11906833}; Short=bZIP protein 34;	A0A6J5UDA3_PRUAR RecName: Full=BZIP domain-containing protein {ECO:0000259|PROSITE:PS50217};	--	GO:0005634,nucleus; GO:0003677,DNA binding; GO:0003700,DNA-binding transcription factor activity; GO:0009555,pollen development; GO:0045893,positive regulation of transcription, DNA-templated; GO:0003674,molecular_function; GO:0003676,nucleic acid binding; GO:0005488,binding; GO:0097159,organic cyclic compound binding; GO:1901363,heterocyclic compound binding; GO:0140110,transcription regulator a…	PF07716.18:Basic region leucine zipper	bZIP	TF	bZIP
PmuVar_Chr2_4173	0.8207	0.6063	1.0249	24.8441	25.4115	31.8059	25	21	35	886	757	955	5.37003	2.36471e-147	2.00857e-145	up	Chr2	29850315	29855717	-	PmuVar_Chr2_4173	--	K01728 pectate lyase [EC:4.2.2.2] | (RefSeq) probable pectate lyase 8 (A)	ko00040: Pentose and glucuronate interconversions; ko01100: Metabolic pathways	PREDICTED: probable pectate lyase 8 [Prunus mume]	PLY15_ARATH RecName: Full=Probable pectate lyase 15; EC=4.2.2.2; AltName: Full=Pectate lyase A11; Flags: Precursor;	A0A6P5RPZ6_PRUAV RecName: Full=Pectate lyase {ECO:0000256|ARBA:ARBA00012272, ECO:0000256|RuleBase:RU361123}; EC=4.2.2.2 {ECO:0000256|ARBA:ARBA00012272, ECO:0000256|RuleBase:RU361123};	--	GO:0046872,metal ion binding; GO:0030570,pectate lyase activity; GO:0045490,pectin catabolic process; GO:0003674,molecular_function; GO:0005488,binding; GO:0043167,ion binding; GO:0043169,cation binding; GO:0003824,catalytic activity; GO:0016829,lyase activity; GO:0016835,carbon-oxygen lyase activity; GO:0016837,carbon-oxygen lyase activity, acting on polysaccharides; GO:0000272,polysaccharide ca…	PF00544.22:Pectate lyase	--	--	--
PmuVar_Chr5_3230	79.2753	75.2158	65.8352	352.458	298.896	359.097	1116	1204	1039	5809	4115	4983	2.50112	2.18334e-146	1.84439e-144	up	Chr5	28472239	28472934	-	PmuVar_Chr5_3230	--	K09286 EREBP-like factor | (RefSeq) ethylene-responsive transcription factor ERF023 (A)	--	PREDICTED: ethylene-responsive transcription factor ERF027 [Prunus mume]	ERF25_ARATH RecName: Full=Ethylene-responsive transcription factor ERF025;	A0A6J5WJS2_PRUAR RecName: Full=AP2/ERF domain-containing protein {ECO:0000259|PROSITE:PS51032};	--	GO:0005634,nucleus; GO:0003700,DNA-binding transcription factor activity; GO:0000976,transcription regulatory region sequence-specific DNA binding; GO:0050832,defense response to fungus; GO:0009873,ethylene-activated signaling pathway; GO:0019760,glucosinolate metabolic process; GO:0003674,molecular_function; GO:0140110,transcription regulator activity; GO:0001067,regulatory region nucleic acid b…	PF00847.23:AP2 domain	AP2/ERF-ERF	TF	AP2/ERF->AP2/ERF-ERF
PmuVar_Chr2_3786	66.2661	61.1413	64.0394	5.0996	6.4076	5.3561	1343	1409	1455	121	127	107	-3.20805	2.41365e-146	2.02786e-144	down	Chr2	26619472	26622809	-	PmuVar_Chr2_3786	--	K00547 homocysteine S-methyltransferase [EC:2.1.1.10] | (RefSeq) homocysteine S-methyltransferase 3 (A)	ko00270: Cysteine and methionine metabolism; ko01100: Metabolic pathways; ko01110: Biosynthesis of secondary metabolites	PREDICTED: homocysteine S-methyltransferase 3 [Prunus mume]	HMT3_ARATH RecName: Full=Homocysteine S-methyltransferase 3; EC=2.1.1.10; AltName: Full=S-methylmethionine:homocysteine methyltransferase 3; Short=AtHMT-3; Short=SMM:Hcy S-methyltransferase 3;	A0A5E4EZQ2_PRUDU SubName: Full=PREDICTED: homocysteine {ECO:0000313|EMBL:VVA20956.1};	Homocysteine S-methyltransferase	GO:0047150,betaine-homocysteine S-methyltransferase activity; GO:0008898,S-adenosylmethionine-homocysteine S-methyltransferase activity; GO:0061627,S-methylmethionine-homocysteine S-methyltransferase activity; GO:0008270,zinc ion binding; GO:0009086,methionine biosynthetic process; GO:0032259,methylation; GO:0033528,S-methylmethionine cycle; GO:0003674,molecular_function; GO:0003824,catalytic act…	PF02574.19:Homocysteine S-methyltransferase	--	--	--
PmuVar_Chr8_0457	4.2189	4.6379	3.2929	58.1077	49.8803	55.8412	64	80	56	1032	740	835	4.05742	2.7942e-146	2.33489e-144	up	Chr8	2616336	2617085	-	PmuVar_Chr8_0457	--	--	--	PREDICTED: fasciclin-like arabinogalactan protein 13 [Prunus mume]	FLA9_ARATH RecName: Full=Fasciclin-like arabinogalactan protein 9; Flags: Precursor;	A0A314ZTM8_PRUYE SubName: Full=Fasciclin-like arabinogalactan protein 13 {ECO:0000313|EMBL:PQQ20281.1};	--	GO:0031225,anchored component of membrane; GO:0046658,anchored component of plasma membrane; GO:0005576,extracellular region; GO:0005886,plasma membrane; GO:0099503,secretory vesicle; GO:0009834,plant-type secondary cell wall biogenesis; GO:0008150,biological_process; GO:0009832,plant-type cell wall biogenesis; GO:0009987,cellular process; GO:0042546,cell wall biogenesis; GO:0044085,cellular comp…	PF02469.25:Fasciclin domain	--	--	--
PmuVar_Chr8_0333	305.075	305.485	262.899	1053.23	958.443	969.18	2388	2719	2307	9652	7337	7478	2.07297	5.17244e-146	4.29897e-144	up	Chr8	1919960	1920346	-	PmuVar_Chr8_0333	--	--	--	unnamed protein product [Prunus armeniaca]	--	A0A6J5Y140_PRUAR SubName: Full=Uncharacterized protein {ECO:0000313|EMBL:CAB4319101.1};	--	--	--	--	--	--
PmuVar_Chr7_0191	0.7044	0.4466	0.6137	10.8722	11.9434	11.8163	43	31	42	777	713	711	4.60515	9.51507e-146	7.86596e-144	up	Chr7	1852897	1855914	+	PmuVar_Chr7_0191	--	--	--	unnamed protein product [Prunus armeniaca]	FTIP3_ARATH RecName: Full=FT-interacting protein 3 {ECO:0000303|PubMed:29742441}; AltName: Full=Multiple C2 domain and transmembrane region protein 3 {ECO:0000303|PubMed:29259105};	A0A6J5UTF2_PRUAR SubName: Full=Uncharacterized protein {ECO:0000313|EMBL:CAB4279899.1};	--	GO:0005737,cytoplasm; GO:0005829,cytosol; GO:0005783,endoplasmic reticulum; GO:0005789,endoplasmic reticulum membrane; GO:0005768,endosome; GO:0010008,endosome membrane; GO:0000139,Golgi membrane; GO:0016021,integral component of membrane; GO:0009505,plant-type cell wall; GO:0005886,plasma membrane; GO:0009506,plasmodesma; GO:0016757,transferase activity, transferring glycosyl groups; GO:0046872,…	PF00168.33:C2 domain	--	--	--
PmuVar_Chr1_2614	73.8468	80.1623	74.2723	211.248	214.294	222.76	1882	2323	2122	6303	5341	5596	1.80763	1.88795e-145	1.55243e-143	up	Chr1	20582628	20585455	+	PmuVar_Chr1_2614	--	--	--	PREDICTED: uncharacterized protein LOC103322637 [Prunus mume]	--	A0A6J5XJG0_PRUAR SubName: Full=Uncharacterized protein {ECO:0000313|EMBL:CAB4312597.1};	--	--	PF03080.18:Neprosin	--	--	--
PmuVar_Chr2_4369	174.602	185.408	173.09	436.76	470.012	487.072	9959	12025	11068	29166	26218	27385	1.68831	2.84713e-145	2.32877e-143	up	Chr2	31559699	31564751	-	PmuVar_Chr2_4369	--	K01535 H+-transporting ATPase [EC:7.1.2.1] | (RefSeq) plasma membrane ATPase 4 (A)	ko00190: Oxidative phosphorylation; ko01100: Metabolic pathways	PREDICTED: plasma membrane ATPase 4 [Prunus mume]	PMA4_NICPL RecName: Full=Plasma membrane ATPase 4; EC=7.1.2.1; AltName: Full=Proton pump 4;	A0A6J5VZ29_PRUAR RecName: Full=Plasma membrane ATPase {ECO:0000256|RuleBase:RU362083}; EC=7.1.2.1 {ECO:0000256|RuleBase:RU362083};	Plasma membrane H+-transporting ATPase	GO:0016021,integral component of membrane; GO:0005886,plasma membrane; GO:0005524,ATP binding; GO:0016887,ATPase activity; GO:0046872,metal ion binding; GO:0008553,proton-exporting ATPase activity, phosphorylative mechanism; GO:0120029,proton export across plasma membrane; GO:0000166,nucleotide binding; GO:0003674,molecular_function; GO:0005488,binding; GO:0017076,purine nucleotide binding; GO:00…	PF00122.23:E1-E2 ATPase	--	--	--
PmuVar_Chr1_1043	2.3699	2.6935	3.6101	36.3123	33.1437	42.7221	65	84	111	1166	889	1155	3.99349	1.08432e-144	8.82238e-143	up	Chr1	10960278	10962529	+	PmuVar_Chr1_1043	--	K07374 tubulin alpha | (RefSeq) tubulin alpha chain-like (A)	ko04145: Phagosome	tubulin alpha chain [Prunus persica]	TBA3_HORVU RecName: Full=Tubulin alpha-3 chain;	M5VY45_PRUPE RecName: Full=Tubulin alpha chain {ECO:0000256|RuleBase:RU000352};	Alpha tubulin	GO:0005737,cytoplasm; GO:0005874,microtubule; GO:0005525,GTP binding; GO:0005200,structural constituent of cytoskeleton; GO:0007017,microtubule-based process; GO:0000166,nucleotide binding; GO:0001882,nucleoside binding; GO:0001883,purine nucleoside binding; GO:0003674,molecular_function; GO:0005488,binding; GO:0017076,purine nucleotide binding; GO:0019001,guanyl nucleotide binding; GO:0032549,ri…	PF00091.28:Tubulin/FtsZ family, GTPase domain	--	--	--
PmuVar_Chr4_1734	40.8555	35.6605	38.9049	200.017	188.501	158.48	533	529	569	3055	2405	2038	2.54739	1.45221e-144	1.17538e-142	up	Chr4	15532283	15533157	+	PmuVar_Chr4_1734	--	K00799 glutathione S-transferase [EC:2.5.1.18] | (RefSeq) glutathione S-transferase F11 (A)	ko00480: Glutathione metabolism; ko01100: Metabolic pathways	PREDICTED: glutathione S-transferase F11 [Prunus mume]	GSTFB_ARATH RecName: Full=Glutathione S-transferase F11 {ECO:0000303|PubMed:12090627}; Short=AtGSTF11 {ECO:0000303|PubMed:12090627}; EC=2.5.1.18 {ECO:0000250|UniProtKB:O80852}; AltName: Full=AtGSTF6 {ECO:0000303|PubMed:12090627}; AltName: Full=GST class-phi {ECO:0000303|PubMed:12090627}; AltName: Full=GST class-phi member 11 {ECO:0000303|PubMed:12090627};	A0A6J5WQC1_PRUAR RecName: Full=Glutathione transferase {ECO:0000256|ARBA:ARBA00012452}; EC=2.5.1.18 {ECO:0000256|ARBA:ARBA00012452};	Glutathione S-transferase	GO:0005737,cytoplasm; GO:0005829,cytosol; GO:0043295,glutathione binding; GO:0004364,glutathione transferase activity; GO:0006749,glutathione metabolic process; GO:0006979,response to oxidative stress; GO:0009407,toxin catabolic process; GO:0003674,molecular_function; GO:0005488,binding; GO:0033218,amide binding; GO:0042277,peptide binding; GO:0043167,ion binding; GO:0043168,anion binding; GO:007…	PF02798.23:Glutathione S-transferase, N-terminal domain	--	--	--
PmuVar_Chr5_2951	333.891	345.956	357.233	1254.75	1050.96	1204.31	2492	2936	2989	10964	7671	8860	2.06291	3.65156e-144	2.94007e-142	up	Chr5	26847388	26847756	-	PmuVar_Chr5_2951	--	--	--	PREDICTED: wound-induced protein 1 [Prunus mume]	WUN1_SOLTU RecName: Full=Wound-induced protein 1;	A0A6J5U439_PRUAR SubName: Full=Uncharacterized protein {ECO:0000313|EMBL:CAB4271031.1};	--	--	PF07107.14:Wound-induced protein WI12	--	--	--
PmuVar_Chr5_0962	4.4844	5.053	5.0502	38.9258	32.6712	42.7641	160	205	202	1626	1140	1504	3.27403	5.36014e-144	4.29339e-142	up	Chr5	10779175	10783557	-	PmuVar_Chr5_0962	--	K03294 basic amino acid/polyamine antiporter, APA family | (RefSeq) cationic amino acid transporter 1-like (A)	--	PREDICTED: cationic amino acid transporter 6, chloroplastic [Prunus mume]	CAAT7_ARATH RecName: Full=Cationic amino acid transporter 7, chloroplastic; Flags: Precursor;	A0A6J5WH42_PRUAR RecName: Full=AA_permease_C domain-containing protein {ECO:0000259|Pfam:PF13906};	Amino acid transporters	GO:0031969,chloroplast membrane; GO:0016021,integral component of membrane; GO:0005886,plasma membrane; GO:0015171,amino acid transmembrane transporter activity; GO:0006865,amino acid transport; GO:0003674,molecular_function; GO:0005215,transporter activity; GO:0005342,organic acid transmembrane transporter activity; GO:0008509,anion transmembrane transporter activity; GO:0015075,ion transmembran…	PF13520.9:Amino acid permease	--	--	--
PmuVar_Chr7_0685	146.177	135.732	146.678	356.425	357.786	354.548	2794	2950	3143	7976	6688	6680	1.6207	6.74161e-143	5.37209e-141	up	Chr7	5539020	5540917	-	PmuVar_Chr7_0685	--	K22418 11beta/17beta-hydroxysteroid dehydrogenase [EC:1.1.1.146 1.1.1.-] | (RefSeq) 11-beta-hydroxysteroid dehydrogenase-like 4A (A)	--	PREDICTED: 11-beta-hydroxysteroid dehydrogenase-like 4A [Prunus mume]	HSDA_SESIN RecName: Full=11-beta-hydroxysteroid dehydrogenase A {ECO:0000305}; EC=1.1.1.- {ECO:0000269|PubMed:11950969, ECO:0000269|PubMed:15331088}; AltName: Full=17-beta-hydroxysteroid dehydrogenase A {ECO:0000305}; EC=1.1.1.62 {ECO:0000269|PubMed:11950969, ECO:0000269|PubMed:15331088}; AltName: Full=Seed oil body protein 2 {ECO:0000303|PubMed:11950969, ECO:0000303|PubMed:15331088}; AltName: Fu…	A0A251P8N9_PRUPE SubName: Full=Uncharacterized protein {ECO:0000313|EMBL:ONI07933.1};	Predicted dehydrogenase	GO:0016021,integral component of membrane; GO:0005811,lipid droplet; GO:0070523,11-beta-hydroxysteroid dehydrogenase (NAD+) activity; GO:0070524,11-beta-hydroxysteroid dehydrogenase (NADP+) activity; GO:0044594,17-beta-hydroxysteroid dehydrogenase (NAD+) activity; GO:0003674,molecular_function; GO:0003824,catalytic activity; GO:0003845,11-beta-hydroxysteroid dehydrogenase [NAD(P)] activity; GO:00…	PF00106.28:short chain dehydrogenase	--	--	--
PmuVar_Chr2_1150	19.5328	21.069	24.4203	1.1222	1.2644	0.9996	1011	1240	1417	68	64	51	-3.96168	9.21525e-143	7.30557e-141	down	Chr2	9298720	9301278	+	PmuVar_Chr2_1150	--	--	--	PREDICTED: pentatricopeptide repeat-containing protein At3g62890-like [Prunus mume]	PP249_ARATH RecName: Full=Pentatricopeptide repeat-containing protein At3g22690;	A0A5E4EGT8_PRUDU SubName: Full=PREDICTED: pentatricopeptide {ECO:0000313|EMBL:VVA15005.1};	FOG: PPR repeat	GO:0008270,zinc ion binding; GO:0003674,molecular_function; GO:0005488,binding; GO:0043167,ion binding; GO:0043169,cation binding; GO:0046872,metal ion binding; GO:0046914,transition metal ion binding	PF01535.23:PPR repeat	--	--	--
PmuVar_Chr7_0254	7.8818	8.0719	7.8524	38.8488	40.1574	40.6031	231	269	258	1333	1151	1173	2.63058	4.30637e-142	3.39654e-140	up	Chr7	2383700	2386342	+	PmuVar_Chr7_0254	--	K01184 polygalacturonase [EC:3.2.1.15] | (RefSeq) polygalacturonase (A)	ko00040: Pentose and glucuronate interconversions; ko01100: Metabolic pathways	PREDICTED: probable polygalacturonase [Prunus mume]	PGLR_VITVI RecName: Full=Probable polygalacturonase; Short=PG {ECO:0000250|UniProtKB:Q7M1E7}; EC=3.2.1.15; AltName: Full=Pectinase {ECO:0000250|UniProtKB:Q7M1E7};	A0A6J5X9I9_PRUAR SubName: Full=Uncharacterized protein {ECO:0000313|EMBL:CAB4310389.1};	--	GO:0016021,integral component of membrane; GO:0004650,polygalacturonase activity; GO:0005975,carbohydrate metabolic process; GO:0003674,molecular_function; GO:0003824,catalytic activity; GO:0004553,hydrolase activity, hydrolyzing O-glycosyl compounds; GO:0016787,hydrolase activity; GO:0016798,hydrolase activity, acting on glycosyl bonds; GO:0008150,biological_process; GO:0008152,metabolic process…	PF00295.20:Glycosyl hydrolases family 28	--	--	--
PmuVar_Chr2_1610	44.0602	41.9669	44.3175	4.9682	6.1706	4.4994	1818	1969	2050	240	249	183	-2.76048	6.4581e-142	5.0678e-140	down	Chr2	12172059	12177978	+	PmuVar_Chr2_1610	--	K06268 serine/threonine-protein phosphatase 2B regulatory subunit | (RefSeq) calcineurin B-like protein 10 isoform X1 (A)	--	hypothetical protein FEM48_Zijuj06G0051400 [Ziziphus jujuba var. spinosa]	CNBLA_ARATH RecName: Full=Calcineurin B-like protein 10; AltName: Full=SOS3-like calcium binding protein 8; Short=SCaBP8;	A0A2N9EW28_FAGSY SubName: Full=Uncharacterized protein {ECO:0000313|EMBL:SPC82977.1};	Ca2+/calmodulin-dependent protein phosphatase (calcineurin subunit B), EF-Hand superfamily protein	GO:0005737,cytoplasm; GO:0005768,endosome; GO:0009705,plant-type vacuole membrane; GO:0005886,plasma membrane; GO:0005509,calcium ion binding; GO:0019900,kinase binding; GO:0019722,calcium-mediated signaling; GO:0042538,hyperosmotic salinity response; GO:0050801,ion homeostasis; GO:0043266,regulation of potassium ion transport; GO:0003674,molecular_function; GO:0005488,binding; GO:0043167,ion bin…	PF00036.35:EF hand	--	--	--
PmuVar_Chr7_1188	28.2691	28.2903	31.14	90.5734	89.21	91.9078	928	1056	1146	3481	2864	2974	1.93385	9.34012e-142	7.29237e-140	up	Chr7	8408688	8411456	+	PmuVar_Chr7_1188	--	--	--	PREDICTED: protein NEN1-like [Prunus mume]	NEN1_ARATH RecName: Full=Protein NEN1 {ECO:0000303|PubMed:25081480}; AltName: Full=NAC45/NAC86-dependent exonuclease-domain protein 1 {ECO:0000303|PubMed:25081480}; EC=3.1.11.-;	A0A6J5XC28_PRUAR RecName: Full=Exonuclease domain-containing protein {ECO:0000259|SMART:SM00479};	--	GO:0005737,cytoplasm; GO:0005634,nucleus; GO:0008408,3'-5' exonuclease activity; GO:0046872,metal ion binding; GO:0003676,nucleic acid binding; GO:0003674,molecular_function; GO:0003824,catalytic activity; GO:0004518,nuclease activity; GO:0004527,exonuclease activity; GO:0016787,hydrolase activity; GO:0016788,hydrolase activity, acting on ester bonds; GO:0005488,binding; GO:0043167,ion binding; G…	PF00929.27:Exonuclease	--	--	--
PmuVar_Chr5_3476	28.9207	30.6531	28.9864	91.2681	92.5917	90.304	809	975	909	2989	2533	2490	1.93178	4.16701e-141	3.23707e-139	up	Chr5	29832262	29836050	-	PmuVar_Chr5_3476	--	K24175 MFS transporter, MFS domain-containing protein family, molybdate-anion transporter | (RefSeq) molybdate-anion transporter (A)	--	PREDICTED: molybdate-anion transporter [Prunus mume]	--	A0A5E4E8M5_PRUDU SubName: Full=PREDICTED: molybdate-anion transporter {ECO:0000313|EMBL:VVA11349.1};	Predicted sugar transporter	GO:0016021,integral component of membrane; GO:0015098,molybdate ion transmembrane transporter activity; GO:0003674,molecular_function; GO:0005215,transporter activity; GO:0008509,anion transmembrane transporter activity; GO:0015075,ion transmembrane transporter activity; GO:0015103,inorganic anion transmembrane transporter activity; GO:0015318,inorganic molecular entity transmembrane transporter …	PF05631.17:Sugar-tranasporters, 12 TM	--	--	--
PmuVar_Chr6_1924	15.3575	15.7571	13.659	65.588	68.2324	65.8735	342	399	341	1710	1486	1446	2.4587	4.34379e-141	3.35753e-139	up	Chr6	14208498	14212861	+	PmuVar_Chr6_1924	--	--	--	PREDICTED: histidine-rich glycoprotein-like [Prunus mume]	--	A0A6P5T4V3_PRUAV SubName: Full=cysteine-rich and transmembrane domain-containing protein WIH2-like isoform X2 {ECO:0000313|RefSeq:XP_021822198.1};	--	GO:0016021,integral component of membrane; GO:0005886,plasma membrane; GO:0005575,cellular_component; GO:0016020,membrane; GO:0031224,intrinsic component of membrane; GO:0110165,cellular anatomical entity; GO:0071944,cell periphery	--	--	--	--
PmuVar_Chr1_0957	25.9563	23.6726	27.3183	107.978	106.585	106.374	378	392	446	1841	1518	1527	2.36349	6.23571e-141	4.7723e-139	up	Chr1	9963880	9966411	-	PmuVar_Chr1_0957	--	K10703 very-long-chain (3R)-3-hydroxyacyl-CoA dehydratase [EC:4.2.1.134] | (RefSeq) very-long-chain (3R)-3-hydroxyacyl-CoA dehydratase PASTICCINO 2A (A)	ko00062: Fatty acid elongation; ko01040: Biosynthesis of unsaturated fatty acids; ko01100: Metabolic pathways; ko01110: Biosynthesis of secondary metabolites; ko01212: Fatty acid metabolism	hypothetical protein GBA52_019929 [Prunus armeniaca]	HACDA_ORYSJ RecName: Full=Very-long-chain (3R)-3-hydroxyacyl-CoA dehydratase PASTICCINO 2A {ECO:0000305}; EC=4.2.1.134 {ECO:0000250|UniProtKB:Q8VZB2}; AltName: Full=3-hydroxyacyl-CoA dehydratase PASTICCINO 2A; Short=HACD; Short=PAS2A; AltName: Full=Protein tyrosine phosphatase-like protein;	A0A6J5XPR9_PRUAR RecName: Full=Very-long-chain (3R)-3-hydroxyacyl-CoA dehydratase {ECO:0000256|ARBA:ARBA00013122, ECO:0000256|RuleBase:RU363109}; EC=4.2.1.134 {ECO:0000256|ARBA:ARBA00013122, ECO:0000256|RuleBase:RU363109};	Protein tyrosine phosphatase-like protein PTPLA (contains Pro instead of catalytic Arg)	GO:0030176,integral component of endoplasmic reticulum membrane; GO:0102343,3-hydroxy-arachidoyl-CoA dehydratase activity; GO:0102344,3-hydroxy-behenoyl-CoA dehydratase activity; GO:0102345,3-hydroxy-lignoceroyl-CoA dehydratase activity; GO:0018812,3-hydroxyacyl-CoA dehydratase activity; GO:0102158,very-long-chain 3-hydroxyacyl-CoA dehydratase activity; GO:0030497,fatty acid elongation; GO:003014…	PF04387.17:Protein tyrosine phosphatase-like protein, PTPLA	--	--	--
PmuVar_Chr6_2646	114.587	110.37	107.672	319.76	294.128	319.492	3108	3404	3274	10154	7802	8542	1.79152	6.23588e-141	4.7723e-139	up	Chr6	19901916	19903664	-	PmuVar_Chr6_2646	--	K13065 shikimate O-hydroxycinnamoyltransferase [EC:2.3.1.133] | (RefSeq) shikimate O-hydroxycinnamoyltransferase-like (A)	ko00940: Phenylpropanoid biosynthesis; ko00941: Flavonoid biosynthesis; ko00945: Stilbenoid, diarylheptanoid and gingerol biosynthesis; ko01100: Metabolic pathways; ko01110: Biosynthesis of secondary metabolites	PREDICTED: shikimate O-hydroxycinnamoyltransferase-like [Prunus mume]	HST_ARATH RecName: Full=Shikimate O-hydroxycinnamoyltransferase {ECO:0000303|PubMed:15161961}; EC=2.3.1.133 {ECO:0000269|PubMed:15161961, ECO:0000269|PubMed:27805809}; AltName: Full=Hydroxycinnamoyl transferase {ECO:0000303|PubMed:15161961, ECO:0000303|PubMed:26858288}; Short=AtHCT {ECO:0000303|PubMed:26858288}; AltName: Full=Hydroxycinnamoyl-Coenzyme A shikimate/quinate hydroxycinnamoyltransfera…	A0A6J5VRC4_PRUAR SubName: Full=Uncharacterized protein {ECO:0000313|EMBL:CAB4289895.1};	--	GO:0005737,cytoplasm; GO:0016020,membrane; GO:0016747,transferase activity, transferring acyl groups other than amino-acyl groups; GO:0047205,quinate O-hydroxycinnamoyltransferase activity; GO:0047172,shikimate O-hydroxycinnamoyltransferase activity; GO:0010252,auxin homeostasis; GO:0071555,cell wall organization; GO:0009809,lignin biosynthetic process; GO:0009963,positive regulation of flavonoid…	PF02458.18:Transferase family	--	--	--
PmuVar_Chr6_0308	125.441	121.435	114.678	414.573	369.914	413.997	1568	1726	1607	6067	4522	5101	2.03227	1.96082e-140	1.49322e-138	up	Chr6	3315649	3316743	-	PmuVar_Chr6_0308	--	--	--	glycine-rich cell wall structural protein-like [Prunus mume]	ASR1_SOLLC RecName: Full=Abscisic stress-ripening protein 1 {ECO:0000303|Ref.2};	D4Q9L8_PRUMU SubName: Full=Abscisic acid stress ripening protein homolog {ECO:0000313|EMBL:BAI94530.1};	--	GO:0005634,nucleus; GO:0032991,protein-containing complex; GO:0042802,identical protein binding; GO:0008270,zinc ion binding; GO:0009414,response to water deprivation; GO:0010043,response to zinc ion; GO:0003674,molecular_function; GO:0005488,binding; GO:0005515,protein binding; GO:0043167,ion binding; GO:0043169,cation binding; GO:0046872,metal ion binding; GO:0046914,transition metal ion bindin…	PF02496.19:ABA/WDS induced protein	--	--	--
PmuVar_Chr5_1923	29.3769	31.7392	31.6893	4.4669	5.4367	3.7297	5050	6204	6107	899	914	632	-2.46815	5.69101e-140	4.31261e-138	down	Chr5	20114066	20133571	+	PmuVar_Chr5_1923	--	K13466 EIX receptor 1/2 | (RefSeq) LRR receptor-like serine/threonine-protein kinase GSO2 (A)	ko04626: Plant-pathogen interaction	PREDICTED: LRR receptor-like serine/threonine-protein kinase GSO1 [Prunus mume]	EIX2_SOLLC RecName: Full=Receptor-like protein EIX2 {ECO:0000305}; AltName: Full=EIX receptor 2 {ECO:0000312|EMBL:AAR28378.1}; Flags: Precursor;	A0A251QGA9_PRUPE RecName: Full=LRRNT_2 domain-containing protein {ECO:0000259|Pfam:PF08263};	FOG: Leucine rich repeat	GO:0016021,integral component of membrane; GO:0005886,plasma membrane; GO:0050832,defense response to fungus; GO:0006950,response to stress; GO:0006952,defense response; GO:0008150,biological_process; GO:0009605,response to external stimulus; GO:0009607,response to biotic stimulus; GO:0009620,response to fungus; GO:0043207,response to external biotic stimulus; GO:0044419,biological process involv…	PF13855.9:Leucine rich repeat	--	--	--
PmuVar_Chr8_0424	16.829	13.7266	16.2561	91.6088	101.02	90.0522	193	179	209	1230	1133	1018	2.8976	2.19185e-139	1.65287e-137	up	Chr8	2454425	2457293	+	PmuVar_Chr8_0424	--	--	--	PREDICTED: axial regulator YABBY 5 [Prunus mume]	YAB5_ARATH RecName: Full=Axial regulator YABBY 5;	A0A6J5Y365_PRUAR SubName: Full=Uncharacterized protein {ECO:0000313|EMBL:CAB4319002.1};	--	GO:0005634,nucleus; GO:0003700,DNA-binding transcription factor activity; GO:0046872,metal ion binding; GO:0000976,transcription regulatory region sequence-specific DNA binding; GO:0010158,abaxial cell fate specification; GO:0045165,cell fate commitment; GO:0009944,polarity specification of adaxial/abaxial axis; GO:2000024,regulation of leaf development; GO:1902183,regulation of shoot apical meri…	PF04690.16:YABBY protein	C2C2-YABBY	TF	C2C2->C2C2-YABBY
PmuVar_Chr1_2153	100.489	85.7821	88.6808	339.438	330.727	321.33	750	728	742	2966	2414	2364	2.15382	3.19905e-139	2.40069e-137	up	Chr1	17798267	17799068	-	PmuVar_Chr1_2153	--	--	--	PREDICTED: rapid alkalinization factor [Prunus mume]	RALF_TOBAC RecName: Full=Rapid alkalinization factor; Short=NtRALF; Flags: Precursor;	A0A6J5VHI2_PRUAR SubName: Full=Uncharacterized protein {ECO:0000313|EMBL:CAB4285358.1};	--	GO:0005576,extracellular region; GO:0005179,hormone activity; GO:0048018,receptor ligand activity; GO:0019722,calcium-mediated signaling; GO:0010469,regulation of signaling receptor activity; GO:0003674,molecular_function; GO:0005102,signaling receptor binding; GO:0005488,binding; GO:0005515,protein binding; GO:0030545,receptor regulator activity; GO:0030546,signaling receptor activator activity;…	PF05498.14:Rapid ALkalinization Factor (RALF)	--	--	--
PmuVar_Chr8_0832	510.099	486.401	545.045	138.195	138.378	126.12	14919	16176	17871	4732	3958	3636	-1.63447	6.10587e-138	4.55994e-136	down	Chr8	4729935	4731704	+	PmuVar_Chr8_0832	--	K14497 protein phosphatase 2C [EC:3.1.3.16] | (RefSeq) protein phosphatase 2C 77 (A)	ko04016: MAPK signaling pathway - plant; ko04075: Plant hormone signal transduction	PREDICTED: protein phosphatase 2C 77 [Prunus mume]	P2C16_ARATH RecName: Full=Protein phosphatase 2C 16; Short=AtPP2C16; EC=3.1.3.16; AltName: Full=AtP2C-HA; AltName: Full=Protein HYPERSENSITIVE TO ABA 1; AltName: Full=Protein phosphatase 2C HAB1; Short=PP2C HAB1; Flags: Precursor;	A0A6J5Y3R1_PRUAR RecName: Full=Protein-serine/threonine phosphatase {ECO:0000256|ARBA:ARBA00013081}; EC=3.1.3.16 {ECO:0000256|ARBA:ARBA00013081};	Serine/threonine protein phosphatase	GO:0005737,cytoplasm; GO:0005634,nucleus; GO:0046872,metal ion binding; GO:0017018,myosin phosphatase activity; GO:0004722,protein serine/threonine phosphatase activity; GO:0009738,abscisic acid-activated signaling pathway; GO:0035970,peptidyl-threonine dephosphorylation; GO:0003674,molecular_function; GO:0005488,binding; GO:0043167,ion binding; GO:0043169,cation binding; GO:0003824,catalytic act…	PF00481.24:Protein phosphatase 2C	--	--	--
PmuVar_Chr7_1657	18.1912	14.4934	16.1464	97.4585	95.1233	100.679	202	183	201	1267	1033	1102	2.89209	3.88463e-136	2.88714e-134	up	Chr7	11335444	11335992	+	PmuVar_Chr7_1657	--	K13448 calcium-binding protein CML | (RefSeq) probable calcium-binding protein CML31 (A)	ko04626: Plant-pathogen interaction	hypothetical protein GBA52_016445 [Prunus armeniaca]	CML38_ARATH RecName: Full=Calcium-binding protein CML38 {ECO:0000303|Ref.5}; AltName: Full=Calmodulin-like protein 38 {ECO:0000303|Ref.5};	A0A6J5X5Z9_PRUAR SubName: Full=Uncharacterized protein {ECO:0000313|EMBL:CAB4309239.1};	Calmodulin and related proteins (EF-Hand superfamily)	GO:0005509,calcium ion binding; GO:0071456,cellular response to hypoxia; GO:0009611,response to wounding; GO:0003674,molecular_function; GO:0005488,binding; GO:0043167,ion binding; GO:0043169,cation binding; GO:0046872,metal ion binding; GO:0001666,response to hypoxia; GO:0006950,response to stress; GO:0008150,biological_process; GO:0009628,response to abiotic stimulus; GO:0009987,cellular proces…	PF00036.35:EF hand	--	--	--
PmuVar_Chr4_1364	79.6016	85.5562	82.0131	16.5685	16.8515	18.4188	4038	4935	4664	984	836	921	-1.95171	3.26687e-135	2.41639e-133	down	Chr4	12761862	12768225	+	PmuVar_Chr4_1364	--	K12309 beta-galactosidase [EC:3.2.1.23] | (RefSeq) beta-galactosidase 17 isoform X1 (A)	ko00052: Galactose metabolism; ko00511: Other glycan degradation; ko00531: Glycosaminoglycan degradation; ko00600: Sphingolipid metabolism; ko00604: Glycosphingolipid biosynthesis - ganglio series; ko01100: Metabolic pathways	PREDICTED: beta-galactosidase 1 [Prunus mume]	BGAL1_ARATH RecName: Full=Beta-galactosidase 1; Short=Lactase 1; EC=3.2.1.23; Flags: Precursor;	A0A6J5U7M3_PRUAR RecName: Full=Beta-galactosidase {ECO:0000256|ARBA:ARBA00012756, ECO:0000256|RuleBase:RU000675}; EC=3.2.1.23 {ECO:0000256|ARBA:ARBA00012756, ECO:0000256|RuleBase:RU000675};	Beta-galactosidase	GO:0048046,apoplast; GO:0005829,cytosol; GO:0009505,plant-type cell wall; GO:0009506,plasmodesma; GO:0005773,vacuole; GO:0004565,beta-galactosidase activity; GO:0030246,carbohydrate binding; GO:0005975,carbohydrate metabolic process; GO:0003674,molecular_function; GO:0003824,catalytic activity; GO:0004553,hydrolase activity, hydrolyzing O-glycosyl compounds; GO:0015925,galactosidase activity; GO:…	PF01301.22:Glycosyl hydrolases family 35	--	--	--
PmuVar_Chr5_2074	38.3006	41.4097	38.9793	157.048	137.806	140.218	667	820	761	3202	2347	2407	2.17675	1.1719e-134	8.62687e-133	up	Chr5	21098406	21100969	+	PmuVar_Chr5_2074	--	K09872 aquaporin PIP | (RefSeq) aquaporin PIP1-2-like (A)	--	PREDICTED: aquaporin PIP1-2-like [Prunus mume]	PIP12_ARATH RecName: Full=Aquaporin PIP1-2; Short=AtPIP1;2; AltName: Full=Plasma membrane intrinsic protein 1b; Short=PIP1b; AltName: Full=Transmembrane protein A; Short=AthH2; Short=TMP-A;	A0A6J5WJY9_PRUAR SubName: Full=Uncharacterized protein {ECO:0000313|EMBL:CAB4300385.1};	Aquaporin (major intrinsic protein family)	GO:0016021,integral component of membrane; GO:0005886,plasma membrane; GO:0015250,water channel activity; GO:0009414,response to water deprivation; GO:0003674,molecular_function; GO:0005215,transporter activity; GO:0005372,water transmembrane transporter activity; GO:0015267,channel activity; GO:0015318,inorganic molecular entity transmembrane transporter activity; GO:0022803,passive transmembran…	PF00230.23:Major intrinsic protein	--	--	--
PmuVar_Chr7_1619	5.6319	4.9935	5.3531	26.5758	27.0709	29.4103	244	246	260	1348	1147	1256	2.68178	2.05475e-134	1.50542e-132	up	Chr7	11016158	11019931	-	PmuVar_Chr7_1619	--	--	--	PREDICTED: probable metal-nicotianamine transporter YSL7 [Prunus mume]	YSL8_ARATH RecName: Full=Probable metal-nicotianamine transporter YSL8; AltName: Full=Protein YELLOW STRIPE LIKE 8; Short=AtYSL8;	A0A6J5XH62_PRUAR SubName: Full=Uncharacterized protein {ECO:0000313|EMBL:CAB4311917.1};	--	GO:0016021,integral component of membrane; GO:0016020,membrane; GO:0035673,oligopeptide transmembrane transporter activity; GO:0003674,molecular_function; GO:0005215,transporter activity; GO:0008509,anion transmembrane transporter activity; GO:0015075,ion transmembrane transporter activity; GO:0022857,transmembrane transporter activity; GO:0042887,amide transmembrane transporter activity; GO:1904…	PF03169.18:OPT oligopeptide transporter protein	--	--	--
PmuVar_Chr6_2569	17.555	18.4318	17.7364	205.945	167.965	151.379	98	117	111	1346	917	833	3.59251	5.08355e-134	3.70692e-132	up	Chr6	19330886	19331161	-	PmuVar_Chr6_2569	--	K14488 SAUR family protein | (RefSeq) auxin-induced protein 15A-like (A)	ko04075: Plant hormone signal transduction	auxin-induced protein 15A-like [Prunus avium]	AX10A_SOYBN RecName: Full=Auxin-induced protein X10A;	A0A6P5RI81_PRUAV SubName: Full=auxin-induced protein 15A-like {ECO:0000313|RefSeq:XP_021802487.1};	--	GO:0009734,auxin-activated signaling pathway; GO:0007154,cell communication; GO:0007165,signal transduction; GO:0008150,biological_process; GO:0009719,response to endogenous stimulus; GO:0009725,response to hormone; GO:0009733,response to auxin; GO:0009755,hormone-mediated signaling pathway; GO:0009987,cellular process; GO:0010033,response to organic substance; GO:0023052,signaling; GO:0032870,ce…	PF02519.17:Auxin responsive protein	--	--	--
PmuVar_Chr2_0959	259.647	273.008	238.507	922.842	803.918	963.42	3860	4615	3975	16062	11688	14118	2.10588	9.95159e-134	7.22261e-132	up	Chr2	7892677	7893411	-	PmuVar_Chr2_0959	--	--	--	unnamed protein product [Prunus armeniaca]	--	A0A6J5TSX9_PRUAR SubName: Full=Uncharacterized protein {ECO:0000313|EMBL:CAB4266822.1};	--	--	--	--	--	--
PmuVar_Chr2_2357	101.908	101.115	98.4712	23.9838	25.9212	25.7706	5825	6572	6310	1605	1449	1452	-1.69328	1.33027e-133	9.60965e-132	down	Chr2	16668146	16671840	+	PmuVar_Chr2_2357	--	K00924 kinase [EC:2.7.1.-] | (RefSeq) receptor protein kinase TMK1 (A)	--	PREDICTED: receptor protein kinase TMK1-like [Prunus mume]	TMK1_ARATH RecName: Full=Receptor protein kinase TMK1 {ECO:0000303|PubMed:1332795}; EC=2.7.11.1 {ECO:0000269|PubMed:1332795}; AltName: Full=BARK1-like kinase 1 {ECO:0000303|PubMed:23921992}; AltName: Full=Transmembrane kinase 1 {ECO:0000303|PubMed:1332795}; Flags: Precursor;	A0A6J5TME6_PRUAR RecName: Full=Protein kinase domain-containing protein {ECO:0000259|PROSITE:PS50011};	--	GO:0005576,extracellular region; GO:0016021,integral component of membrane; GO:0005634,nucleus; GO:0005886,plasma membrane; GO:0005524,ATP binding; GO:0106310,protein serine kinase activity; GO:0004675,transmembrane receptor protein serine/threonine kinase activity; GO:0006468,protein phosphorylation; GO:0007165,signal transduction; GO:0000166,nucleotide binding; GO:0003674,molecular_function; GO…	PF07714.20:Protein tyrosine and serine/threonine kinase	--	--	--
PmuVar_Chr7_1546	0.7917	0.9161	1.0222	12.8842	13.7837	12.5551	38	50	55	724	647	594	4.14146	2.14696e-132	1.54372e-130	up	Chr7	10614922	10619112	+	PmuVar_Chr7_1546	--	K03549 KUP system potassium uptake protein | (RefSeq) potassium transporter 2 (A)	--	PREDICTED: potassium transporter 2 [Prunus mume]	POT2_ARATH RecName: Full=Potassium transporter 2; Short=AtKT2; Short=AtKUP2; Short=AtPOT2;	A0A6J5UXK9_PRUAR RecName: Full=Potassium transporter {ECO:0000256|RuleBase:RU321113};	--	GO:0016021,integral component of membrane; GO:0016020,membrane; GO:0005886,plasma membrane; GO:0015079,potassium ion transmembrane transporter activity; GO:0006813,potassium ion transport; GO:0003674,molecular_function; GO:0005215,transporter activity; GO:0008324,cation transmembrane transporter activity; GO:0015075,ion transmembrane transporter activity; GO:0015318,inorganic molecular entity tra…	PF02705.19:K+ potassium transporter	--	--	--
PmuVar_Chr5_1788	38.6147	36.7083	41.364	105.112	114.997	104.954	1359	1469	1632	4331	3958	3641	1.77953	2.24673e-132	1.60797e-130	up	Chr5	19191441	19195786	+	PmuVar_Chr5_1788	--	K00800 3-phosphoshikimate 1-carboxyvinyltransferase [EC:2.5.1.19] | (RefSeq) 3-phosphoshikimate 1-carboxyvinyltransferase 2 (A)	ko00400: Phenylalanine, tyrosine and tryptophan biosynthesis; ko01100: Metabolic pathways; ko01110: Biosynthesis of secondary metabolites; ko01230: Biosynthesis of amino acids	PREDICTED: 3-phosphoshikimate 1-carboxyvinyltransferase 2 [Prunus mume]	AROA_PETHY RecName: Full=3-phosphoshikimate 1-carboxyvinyltransferase, chloroplastic {ECO:0000303|PubMed:3346248}; EC=2.5.1.19 {ECO:0000269|PubMed:1939260}; AltName: Full=5-enolpyruvylshikimate-3-phosphate synthase {ECO:0000303|PubMed:3346248}; Short=EPSP synthase {ECO:0000303|PubMed:3346248}; Flags: Precursor;	A0A6J5WEC5_PRUAR RecName: Full=3-phosphoshikimate 1-carboxyvinyltransferase {ECO:0000256|ARBA:ARBA00012450, ECO:0000256|RuleBase:RU004164}; EC=2.5.1.19 {ECO:0000256|ARBA:ARBA00012450, ECO:0000256|RuleBase:RU004164};	Pentafunctional AROM protein	GO:0009507,chloroplast; GO:0003866,3-phosphoshikimate 1-carboxyvinyltransferase activity; GO:0009073,aromatic amino acid family biosynthetic process; GO:0008652,cellular amino acid biosynthetic process; GO:0009423,chorismate biosynthetic process; GO:0007623,circadian rhythm; GO:0010597,green leaf volatile biosynthetic process; GO:0009635,response to herbicide; GO:0003674,molecular_function; GO:00…	PF00275.23:EPSP synthase (3-phosphoshikimate 1-carboxyvinyltransferase)	--	--	--
PmuVar_Chr7_2004	1.8513	2.1746	2.1248	14.8948	16.9706	21.4076	143	191	184	1347	1282	1630	3.41544	2.66047e-132	1.89531e-130	up	Chr7	14678418	14685790	+	PmuVar_Chr7_2004	--	K05658 ATP-binding cassette, subfamily B (MDR/TAP), member 1 [EC:7.6.2.2] | (RefSeq) ABC transporter B family member 2-like (A)	ko02010: ABC transporters	PREDICTED: ABC transporter B family member 2-like [Prunus mume]	AB2B_ARATH RecName: Full=ABC transporter B family member 2; Short=ABC transporter ABCB.2; Short=AtABCB2; AltName: Full=Multidrug resistance protein 2; AltName: Full=P-glycoprotein 2; Flags: Precursor;	A0A6J5XAT3_PRUAR SubName: Full=Uncharacterized protein {ECO:0000313|EMBL:CAB4309603.1};	Multidrug/pheromone exporter, ABC superfamily	GO:0005829,cytosol; GO:0016021,integral component of membrane; GO:0140359,ABC-type transporter activity; GO:0005524,ATP binding; GO:0042626,ATPase-coupled transmembrane transporter activity; GO:0055085,transmembrane transport; GO:0003674,molecular_function; GO:0003824,catalytic activity; GO:0005215,transporter activity; GO:0015399,primary active transmembrane transporter activity; GO:0016462,pyro…	PF00664.26:ABC transporter transmembrane region	--	--	--
PmuVar_Chr8_1788	43.0092	38.2956	32.8669	218.929	193.312	214.899	321	325	275	1913	1411	1581	2.7626	3.28448e-131	2.32912e-129	up	Chr8	10894407	10894775	+	PmuVar_Chr8_1788	--	--	--	PREDICTED: uncharacterized protein LOC103341717 [Prunus mume]	GIR1_ARATH RecName: Full=Protein GL2-INTERACTING REPRESSOR 1 {ECO:0000303|PubMed:28526410};	A0A6J5VG30_PRUAR SubName: Full=Uncharacterized protein {ECO:0000313|EMBL:CAB4287083.1};	--	GO:0005634,nucleus; GO:0045892,negative regulation of transcription, DNA-templated; GO:0080147,root hair cell development; GO:0006139,nucleobase-containing compound metabolic process; GO:0006351,transcription, DNA-templated; GO:0006355,regulation of transcription, DNA-templated; GO:0006725,cellular aromatic compound metabolic process; GO:0006807,nitrogen compound metabolic process; GO:0008150,bio…	--	--	--	--
PmuVar_Chr2_2090	0.9434	1.0112	0.8678	18.6847	19.022	16.5096	32	39	33	742	631	552	4.56505	3.86317e-131	2.72698e-129	up	Chr2	14951513	14953526	+	PmuVar_Chr2_2090	--	K05658 ATP-binding cassette, subfamily B (MDR/TAP), member 1 [EC:7.6.2.2] | (RefSeq) ABC transporter B family member 13-like (A)	ko02010: ABC transporters	PREDICTED: ABC transporter B family member 13-like [Prunus mume]	AB13B_ARATH RecName: Full=ABC transporter B family member 13; Short=ABC transporter ABCB.13; Short=AtABCB13; AltName: Full=P-glycoprotein 13; AltName: Full=Putative multidrug resistance protein 15;	A0A6J5TSY1_PRUAR SubName: Full=Uncharacterized protein {ECO:0000313|EMBL:CAB4265548.1};	Multidrug/pheromone exporter, ABC superfamily	GO:0016021,integral component of membrane; GO:0140359,ABC-type transporter activity; GO:0005524,ATP binding; GO:0042626,ATPase-coupled transmembrane transporter activity; GO:0055085,transmembrane transport; GO:0003674,molecular_function; GO:0003824,catalytic activity; GO:0005215,transporter activity; GO:0015399,primary active transmembrane transporter activity; GO:0016462,pyrophosphatase activity…	PF00664.26:ABC transporter transmembrane region	--	--	--
PmuVar_Chr7_0690	2.2746	1.7362	2.0673	28.1163	27.252	26.2104	53	46	54	767	621	602	4.05439	8.36876e-131	5.88057e-129	up	Chr7	5559583	5561926	-	PmuVar_Chr7_0690	--	--	--	hypothetical protein GBA52_017189 [Prunus armeniaca]	HIP7_ARATH RecName: Full=Heavy metal-associated isoprenylated plant protein 7 {ECO:0000303|PubMed:21072340, ECO:0000303|PubMed:23368984}; Short=AtHIP07 {ECO:0000303|PubMed:21072340, ECO:0000303|PubMed:23368984}; AltName: Full=Farnesylated protein 3 {ECO:0000303|PubMed:8837031}; Short=AtFP3 {ECO:0000303|PubMed:8837031}; Flags: Precursor;	A0A6P5SQ96_PRUAV SubName: Full=heavy metal-associated isoprenylated plant protein 7-like {ECO:0000313|RefSeq:XP_021818294.1};	Copper chaperone	GO:0046914,transition metal ion binding; GO:0046916,cellular transition metal ion homeostasis; GO:0003674,molecular_function; GO:0005488,binding; GO:0043167,ion binding; GO:0043169,cation binding; GO:0046872,metal ion binding; GO:0006873,cellular ion homeostasis; GO:0006875,cellular metal ion homeostasis; GO:0008150,biological_process; GO:0009987,cellular process; GO:0019725,cellular homeostasis;…	PF00403.29:Heavy-metal-associated domain	--	--	--
PmuVar_Chr1_3801	214.517	214.83	222.239	611.523	683.146	535.623	10934	12451	12699	36492	34053	26911	1.79006	2.49355e-130	1.74424e-128	up	Chr1	29191180	29231001	-	PmuVar_Chr1_3801	--	K13032 prunasin beta-glucosidase [EC:3.2.1.118] | (RefSeq) beta-glucosidase 12-like isoform X1 (A)	ko00460: Cyanoamino acid metabolism; ko01100: Metabolic pathways; ko01110: Biosynthesis of secondary metabolites	beta-glucosidase 12-like [Prunus avium]	BGL12_ORYSI RecName: Full=Beta-glucosidase 12 {ECO:0000305}; EC=3.2.1.21 {ECO:0000305}; Flags: Precursor;	A0A6P5SEA5_PRUAV SubName: Full=beta-glucosidase 12-like {ECO:0000313|RefSeq:XP_021811861.1};	Beta-glucosidase, lactase phlorizinhydrolase, and related proteins	GO:0005576,extracellular region; GO:0033907,beta-D-fucosidase activity; GO:0004565,beta-galactosidase activity; GO:0008422,beta-glucosidase activity; GO:0102483,scopolin beta-glucosidase activity; GO:0005975,carbohydrate metabolic process; GO:0003674,molecular_function; GO:0003824,catalytic activity; GO:0004553,hydrolase activity, hydrolyzing O-glycosyl compounds; GO:0016787,hydrolase activity; G…	PF00232.21:Glycosyl hydrolase family 1	--	--	--
PmuVar_Chr2_2851	6.6819	6.8751	6.5257	30.1607	31.1914	32.8484	253	296	277	1337	1155	1226	2.53159	7.459e-130	5.19408e-128	up	Chr2	19918404	19922956	+	PmuVar_Chr2_2851	--	K20027 palmitoyltransferase ZDHHC1/11 [EC:2.3.1.225] | (RefSeq) probable protein S-acyltransferase 22 (A)	--	hypothetical protein GBA52_002863 [Prunus armeniaca]	ZDHC1_ARATH RecName: Full=Probable protein S-acyltransferase 22; EC=2.3.1.225; AltName: Full=Probable palmitoyltransferase At1g69420; AltName: Full=Zinc finger DHHC domain-containing protein At1g69420;	A0A6J5TNW0_PRUAR RecName: Full=S-acyltransferase {ECO:0000256|RuleBase:RU079119}; EC=2.3.1.225 {ECO:0000256|RuleBase:RU079119}; AltName: Full=Palmitoyltransferase {ECO:0000256|RuleBase:RU079119};	DHHC-type Zn-finger proteins	GO:0030659,cytoplasmic vesicle membrane; GO:0005783,endoplasmic reticulum; GO:0005794,Golgi apparatus; GO:0016021,integral component of membrane; GO:0005886,plasma membrane; GO:0019706,protein-cysteine S-palmitoyltransferase activity; GO:0018230,peptidyl-L-cysteine S-palmitoylation; GO:0006612,protein targeting to membrane; GO:0003674,molecular_function; GO:0003824,catalytic activity; GO:0016409,…	PF01529.23:DHHC palmitoyltransferase	--	--	--
PmuVar_Chr1_2619	140.757	154.675	116.158	863.742	874.619	653.683	521	651	482	3743	3166	2385	2.83826	7.70038e-130	5.33812e-128	up	Chr1	20613880	20614062	+	PmuVar_Chr1_2619	--	--	--	hypothetical protein GBA52_021890 [Prunus armeniaca]	AGP14_ARATH RecName: Full=Arabinogalactan protein 14 {ECO:0000303|PubMed:11006345}; Short=AtAGP14 {ECO:0000303|PubMed:11006345}; AltName: Full=Arabinogalactan peptide 14 {ECO:0000303|PubMed:11006345}; Short=AG-peptide 14 {ECO:0000303|PubMed:11006345}; Flags: Precursor;	A0A6J5XHZ6_PRUAR SubName: Full=Uncharacterized protein {ECO:0000313|EMBL:CAB4312601.1};	--	GO:0031225,anchored component of membrane; GO:0005886,plasma membrane; GO:0048767,root hair elongation; GO:0007275,multicellular organism development; GO:0008150,biological_process; GO:0009653,anatomical structure morphogenesis; GO:0009888,tissue development; GO:0009987,cellular process; GO:0010015,root morphogenesis; GO:0010053,root epidermal cell differentiation; GO:0010054,trichoblast differen…	--	--	--	--
PmuVar_Chr4_0828	174.262	172.633	166.058	427.906	427.697	469.882	4642	5229	4959	13345	11142	12338	1.67213	2.1695e-129	1.49724e-127	up	Chr4	8334384	8336981	-	PmuVar_Chr4_0828	--	K13065 shikimate O-hydroxycinnamoyltransferase [EC:2.3.1.133] | (RefSeq) shikimate O-hydroxycinnamoyltransferase-like (A)	ko00940: Phenylpropanoid biosynthesis; ko00941: Flavonoid biosynthesis; ko00945: Stilbenoid, diarylheptanoid and gingerol biosynthesis; ko01100: Metabolic pathways; ko01110: Biosynthesis of secondary metabolites	shikimate O-hydroxycinnamoyltransferase-like [Prunus mume]	HST_ARATH RecName: Full=Shikimate O-hydroxycinnamoyltransferase {ECO:0000303|PubMed:15161961}; EC=2.3.1.133 {ECO:0000269|PubMed:15161961, ECO:0000269|PubMed:27805809}; AltName: Full=Hydroxycinnamoyl transferase {ECO:0000303|PubMed:15161961, ECO:0000303|PubMed:26858288}; Short=AtHCT {ECO:0000303|PubMed:26858288}; AltName: Full=Hydroxycinnamoyl-Coenzyme A shikimate/quinate hydroxycinnamoyltransfera…	Q2Z1Y0_PRUMU SubName: Full=Alcohol acyl-transferase {ECO:0000313|EMBL:BAE48668.1};	--	GO:0005737,cytoplasm; GO:0016020,membrane; GO:0016747,transferase activity, transferring acyl groups other than amino-acyl groups; GO:0047205,quinate O-hydroxycinnamoyltransferase activity; GO:0047172,shikimate O-hydroxycinnamoyltransferase activity; GO:0010252,auxin homeostasis; GO:0071555,cell wall organization; GO:0009809,lignin biosynthetic process; GO:0009963,positive regulation of flavonoid…	PF02458.18:Transferase family	--	--	--
PmuVar_Chr1_2872	1.7943	2.2012	1.9502	12.5825	13.5829	13.675	119	166	145	977	881	894	3.04282	9.55806e-129	6.56703e-127	up	Chr1	22347002	22350406	+	PmuVar_Chr1_2872	--	K00924 kinase [EC:2.7.1.-] | (RefSeq) receptor protein kinase CLAVATA1 (A)	--	PREDICTED: LOW QUALITY PROTEIN: probable LRR receptor-like serine/threonine-protein kinase At4g26540 [Prunus mume]	RGI3_ARATH RecName: Full=LRR receptor-like serine/threonine-protein kinase RGI3 {ECO:0000305}; EC=2.7.11.1 {ECO:0000255|PROSITE-ProRule:PRU00159}; AltName: Full=Protein RECEPTOR OF RGF1 1 {ECO:0000303|PubMed:27229311}; AltName: Full=Protein RGF1 INSENSITIVE 3 {ECO:0000303|PubMed:27229312}; Flags: Precursor;	A0A6J5V2L5_PRUAR RecName: Full=Protein kinase domain-containing protein {ECO:0000259|PROSITE:PS50011};	--	GO:0016021,integral component of membrane; GO:0005886,plasma membrane; GO:0005524,ATP binding; GO:0042277,peptide binding; GO:0001653,peptide receptor activity; GO:0106310,protein serine kinase activity; GO:0004674,protein serine/threonine kinase activity; GO:0010074,maintenance of meristem identity; GO:0010078,maintenance of root meristem identity; GO:0006468,protein phosphorylation; GO:2000280,…	PF13855.9:Leucine rich repeat	--	--	--
PmuVar_Chr8_1531	4.3483	5.5037	5.6252	22.8897	25.5843	27.7958	362	521	525	2231	2083	2281	2.60129	1.08855e-128	7.44596e-127	up	Chr8	8998978	9004930	-	PmuVar_Chr8_1531	--	K05658 ATP-binding cassette, subfamily B (MDR/TAP), member 1 [EC:7.6.2.2] | (RefSeq) ABC transporter B family member 1 (A)	ko02010: ABC transporters	ABC transporter B family member 1 [Prunus persica]	AB1B_ARATH RecName: Full=ABC transporter B family member 1; Short=ABC transporter ABCB.1; Short=AtABCB1; AltName: Full=Multidrug resistance protein 1; AltName: Full=P-glycoprotein 1; Short=AtPgp1;	M5VXQ8_PRUPE SubName: Full=Uncharacterized protein {ECO:0000313|EMBL:EMJ05881.1};	Multidrug/pheromone exporter, ABC superfamily	GO:0005783,endoplasmic reticulum; GO:0016021,integral component of membrane; GO:0005886,plasma membrane; GO:0009506,plasmodesma; GO:0140359,ABC-type transporter activity; GO:0005524,ATP binding; GO:0042626,ATPase-coupled transmembrane transporter activity; GO:0010329,auxin efflux transmembrane transporter activity; GO:0010328,auxin influx transmembrane transporter activity; GO:0043481,anthocyanin…	PF00664.26:ABC transporter transmembrane region	--	--	--
PmuVar_Chr2_2815	8.2915	9.0094	6.9988	44.5999	42.5666	41.6062	242	299	229	1524	1215	1197	2.70779	8.29188e-128	5.64688e-126	up	Chr2	19739038	19740480	+	PmuVar_Chr2_2815	--	K00012 UDPglucose 6-dehydrogenase [EC:1.1.1.22] | (RefSeq) UDP-glucose 6-dehydrogenase 5 (A)	ko00040: Pentose and glucuronate interconversions; ko00053: Ascorbate and aldarate metabolism; ko00520: Amino sugar and nucleotide sugar metabolism; ko01100: Metabolic pathways; ko01240: Biosynthesis of cofactors; ko01250: Biosynthesis of nucleotide sugars	UDP-glucose 6-dehydrogenase 5 [Prunus persica]	UGDH5_ORYSJ RecName: Full=UDP-glucose 6-dehydrogenase 5; Short=UDP-Glc dehydrogenase 5; Short=UDP-GlcDH 5; Short=UDPGDH 5; EC=1.1.1.22; AltName: Full=Os-UGD5;	M5XLE4_PRUPE RecName: Full=UDP-glucose 6-dehydrogenase {ECO:0000256|ARBA:ARBA00012954, ECO:0000256|PIRNR:PIRNR000124}; EC=1.1.1.22 {ECO:0000256|ARBA:ARBA00012954, ECO:0000256|PIRNR:PIRNR000124};	UDP-glucose/GDP-mannose dehydrogenase	GO:0005829,cytosol; GO:0005634,nucleus; GO:0051287,NAD binding; GO:0003979,UDP-glucose 6-dehydrogenase activity; GO:0006024,glycosaminoglycan biosynthetic process; GO:0006065,UDP-glucuronate biosynthetic process; GO:0000166,nucleotide binding; GO:0003674,molecular_function; GO:0005488,binding; GO:0036094,small molecule binding; GO:0097159,organic cyclic compound binding; GO:1901265,nucleoside pho…	PF03721.17:UDP-glucose/GDP-mannose dehydrogenase family, NAD binding domain	--	--	--
PmuVar_Chr5_2337	133.047	135.272	125.193	15.9648	20.0711	19.8452	1986	2296	2095	279	293	292	-2.51918	9.1597e-128	6.21052e-126	down	Chr5	22964567	22965422	-	PmuVar_Chr5_2337	--	K09338 homeobox-leucine zipper protein | (RefSeq) homeobox-leucine zipper protein ATHB-12-like (A)	--	PREDICTED: homeobox-leucine zipper protein ATHB-12-like [Prunus mume]	ATHB7_ARATH RecName: Full=Homeobox-leucine zipper protein ATHB-7; AltName: Full=HD-ZIP protein ATHB-7; AltName: Full=Homeodomain transcription factor ATHB-7;	A0A5E4FCF4_PRUDU SubName: Full=PREDICTED: homeobox-leucine zipper {ECO:0000313|EMBL:VVA25527.1};	Transcription factor HEX, contains HOX and HALZ domains	GO:0005634,nucleus; GO:0003700,DNA-binding transcription factor activity; GO:0000981,DNA-binding transcription factor activity, RNA polymerase II-specific; GO:0043565,sequence-specific DNA binding; GO:0000976,transcription regulatory region sequence-specific DNA binding; GO:0045893,positive regulation of transcription, DNA-templated; GO:0009737,response to abscisic acid; GO:0009414,response to wa…	PF00046.32:Homeodomain	HB-HD-ZIP	TF	HB->HB-HD-ZIP
PmuVar_Chr1_3439	1.355	1.0628	0.7187	23.5234	23.0678	28.385	37	33	22	752	616	764	4.89323	1.23571e-127	8.34184e-126	up	Chr1	26255304	26256653	+	PmuVar_Chr1_3439	--	K15397 3-ketoacyl-CoA synthase [EC:2.3.1.199] | (RefSeq) 3-ketoacyl-CoA synthase 12 (A)	ko00062: Fatty acid elongation; ko01100: Metabolic pathways; ko01110: Biosynthesis of secondary metabolites; ko04626: Plant-pathogen interaction	PREDICTED: 3-ketoacyl-CoA synthase 12 [Prunus mume]	KCS12_ARATH RecName: Full=3-ketoacyl-CoA synthase 12 {ECO:0000303|PubMed:18465198}; Short=KCS-12 {ECO:0000303|PubMed:18465198}; EC=2.3.1.199 {ECO:0000305}; AltName: Full=Very long-chain fatty acid condensing enzyme 12 {ECO:0000303|PubMed:18465198}; Short=VLCFA condensing enzyme 12 {ECO:0000303|PubMed:18465198}; Flags: Precursor;	A0A4Y1RLT9_PRUDU RecName: Full=3-ketoacyl-CoA synthase {ECO:0000256|PIRNR:PIRNR036417}; EC=2.3.1.- {ECO:0000256|PIRNR:PIRNR036417};	--	GO:0005783,endoplasmic reticulum; GO:0016020,membrane; GO:0102756,very-long-chain 3-ketoacyl-CoA synthase activity; GO:0006633,fatty acid biosynthetic process; GO:0003674,molecular_function; GO:0003824,catalytic activity; GO:0016740,transferase activity; GO:0016746,transferase activity, transferring acyl groups; GO:0016747,transferase activity, transferring acyl groups other than amino-acyl group…	PF08392.15:FAE1/Type III polyketide synthase-like protein	--	--	--
PmuVar_Chr7_0514	6.8793	9.1747	8.328	42.972	44.7955	44.2515	182	276	247	1331	1159	1154	2.73513	3.11642e-127	2.09464e-125	up	Chr7	4523077	4525565	-	PmuVar_Chr7_0514	--	K24175 MFS transporter, MFS domain-containing protein family, molybdate-anion transporter | (RefSeq) molybdate-anion transporter-like (A)	--	PREDICTED: molybdate-anion transporter-like [Prunus mume]	--	A0A6J5XF47_PRUAR SubName: Full=Uncharacterized protein {ECO:0000313|EMBL:CAB4310682.1};	Predicted sugar transporter	GO:0016021,integral component of membrane; GO:0015098,molybdate ion transmembrane transporter activity; GO:0003674,molecular_function; GO:0005215,transporter activity; GO:0008509,anion transmembrane transporter activity; GO:0015075,ion transmembrane transporter activity; GO:0015103,inorganic anion transmembrane transporter activity; GO:0015318,inorganic molecular entity transmembrane transporter …	PF05631.17:Sugar-tranasporters, 12 TM	--	--	--
PmuVar_Chr2_4633	5.0683	5.205	6.2127	31.3928	31.8974	34.035	155	181	213	1124	954	1026	2.86282	5.06483e-127	3.38949e-125	up	Chr2	34041610	34044101	+	PmuVar_Chr2_4633	--	K13430 serine/threonine-protein kinase PBS1 [EC:2.7.11.1] | (RefSeq) serine/threonine-protein kinase PBS1 (A)	ko04626: Plant-pathogen interaction	PREDICTED: probable receptor-like protein kinase At5g18500 [Prunus mume]	Y5185_ARATH RecName: Full=Probable receptor-like protein kinase At5g18500; EC=2.7.11.1;	A0A6J5VZP2_PRUAR RecName: Full=Protein kinase domain-containing protein {ECO:0000259|PROSITE:PS50011};	Serine/threonine protein kinase	GO:0016021,integral component of membrane; GO:0005886,plasma membrane; GO:0005524,ATP binding; GO:0106310,protein serine kinase activity; GO:0004674,protein serine/threonine kinase activity; GO:0006468,protein phosphorylation; GO:0000166,nucleotide binding; GO:0003674,molecular_function; GO:0005488,binding; GO:0017076,purine nucleotide binding; GO:0030554,adenyl nucleotide binding; GO:0032553,rib…	PF00069.28:Protein kinase domain	--	--	--
PmuVar_Chr1_2366	437.205	420.929	473.16	1117.96	1089.25	1003.2	6818	7464	8272	20411	16612	15421	1.57212	8.94892e-126	5.96299e-124	up	Chr1	18948066	18949603	+	PmuVar_Chr1_2366	--	K14484 auxin-responsive protein IAA | (RefSeq) auxin-responsive protein IAA16 (A)	ko04075: Plant hormone signal transduction	PREDICTED: auxin-responsive protein IAA16 [Prunus mume]	IAA16_ARATH RecName: Full=Auxin-responsive protein IAA16; AltName: Full=Indoleacetic acid-induced protein 16;	A0A6J5XVP4_PRUAR RecName: Full=Auxin-responsive protein {ECO:0000256|RuleBase:RU004549};	--	GO:0005634,nucleus; GO:0003700,DNA-binding transcription factor activity; GO:0042802,identical protein binding; GO:0000976,transcription regulatory region sequence-specific DNA binding; GO:0009734,auxin-activated signaling pathway; GO:0009733,response to auxin; GO:0003674,molecular_function; GO:0140110,transcription regulator activity; GO:0005488,binding; GO:0005515,protein binding; GO:0001067,re…	PF02309.19:AUX/IAA family	AUX/IAA	TR	AUX/IAA
PmuVar_Chr5_0519	2.3435	3.0582	4.046	36.9992	31.2293	39.3048	62	92	120	1146	808	1025	3.80805	1.85798e-125	1.23273e-123	up	Chr5	5777789	5780031	+	PmuVar_Chr5_0519	--	K22683 aspartyl protease family protein [EC:3.4.23.-] | (RefSeq) LOW QUALITY PROTEIN: aspartyl protease family protein 2-like (A)	--	PREDICTED: aspartyl protease AED3 [Prunus mume]	AED3_ARATH RecName: Full=Aspartyl protease AED3 {ECO:0000303|PubMed:24755512}; EC=3.4.23.- {ECO:0000305}; AltName: Full=Apoplastic EDS1-dependent protein 3 {ECO:0000303|PubMed:24755512}; Flags: Precursor;	A0A6J5WE72_PRUAR RecName: Full=Peptidase A1 domain-containing protein {ECO:0000259|PROSITE:PS51767};	Aspartyl protease	GO:0048046,apoplast; GO:0099503,secretory vesicle; GO:0004190,aspartic-type endopeptidase activity; GO:0000166,nucleotide binding; GO:0006508,proteolysis; GO:0043067,regulation of programmed cell death; GO:0009627,systemic acquired resistance; GO:0003674,molecular_function; GO:0003824,catalytic activity; GO:0004175,endopeptidase activity; GO:0008233,peptidase activity; GO:0016787,hydrolase activi…	PF14543.9:Xylanase inhibitor N-terminal	--	--	--
PmuVar_Chr1_3001	4.9328	4.6339	5.8335	32.2706	34.8493	37.8356	132	141	175	1011	912	998	3.07059	3.7606e-125	2.4844e-123	up	Chr1	23357346	23359758	+	PmuVar_Chr1_3001	--	K20557 transcription factor VIP1 | (RefSeq) transcription factor VIP1 (A)	ko04016: MAPK signaling pathway - plant	unnamed protein product [Prunus armeniaca]	RF2B_ORYSJ RecName: Full=Transcription factor RF2b;	A0A6J5XF55_PRUAR RecName: Full=BZIP domain-containing protein {ECO:0000259|PROSITE:PS50217};	--	GO:0005634,nucleus; GO:0003677,DNA binding; GO:0003700,DNA-binding transcription factor activity; GO:0003674,molecular_function; GO:0003676,nucleic acid binding; GO:0005488,binding; GO:0097159,organic cyclic compound binding; GO:1901363,heterocyclic compound binding; GO:0140110,transcription regulator activity; GO:0005575,cellular_component; GO:0005622,intracellular anatomical structure; GO:00432…	PF00170.24:bZIP transcription factor	bZIP	TF	bZIP
PmuVar_Chr3_2283	6.5718	7.0244	5.1406	84.1134	67.1991	75.4916	65	79	57	974	650	736	3.9027	6.6722e-125	4.38917e-123	up	Chr3	16853952	16854440	+	PmuVar_Chr3_2283	--	--	--	PREDICTED: glycine-rich cell wall structural protein [Prunus mume]	--	A0A6J5X8I8_PRUAR SubName: Full=Uncharacterized protein {ECO:0000313|EMBL:CAB4308295.1};	--	--	--	--	--	--
PmuVar_Chr1_1161	0.509	0.2425	0.5865	13.6417	13.6417	17.2353	24	13	31	753	629	801	5.36863	1.33887e-124	8.77017e-123	up	Chr1	11782752	11785082	+	PmuVar_Chr1_1161	--	--	--	PREDICTED: subtilisin-like protease SBT1.7 [Prunus mume]	SBT17_ARATH RecName: Full=Subtilisin-like protease SBT1.7 {ECO:0000303|PubMed:16193095}; EC=3.4.21.- {ECO:0000305}; AltName: Full=Cucumisin-like serine protease; AltName: Full=Subtilase subfamily 1 member 7 {ECO:0000303|PubMed:16193095}; Short=AtSBT1.7 {ECO:0000303|PubMed:16193095}; AltName: Full=Subtilisin-like serine protease 1 {ECO:0000303|PubMed:12702015}; Short=At-SLP1 {ECO:0000303|PubMed:12…	A0A6J5V593_PRUAR SubName: Full=Uncharacterized protein {ECO:0000313|EMBL:CAB4284136.1};	--	GO:0048046,apoplast; GO:0005576,extracellular region; GO:0099503,secretory vesicle; GO:0004252,serine-type endopeptidase activity; GO:0080001,mucilage extrusion from seed coat; GO:0048359,mucilage metabolic process involved in seed coat development; GO:0006508,proteolysis; GO:0010214,seed coat development; GO:0003674,molecular_function; GO:0003824,catalytic activity; GO:0004175,endopeptidase acti…	PF00082.25:Subtilase family	--	--	--
PmuVar_Chr2_3761	5.8953	6.363	4.7806	88.2355	87.4084	74.4876	44	54	40	771	638	548	4.1781	2.14699e-124	1.40044e-122	up	Chr2	26475348	26475716	-	PmuVar_Chr2_3761	--	--	--	uncharacterized protein LOC117614499 [Prunus dulcis]	--	A0A6J5TDT1_PRUAR SubName: Full=Uncharacterized protein {ECO:0000313|EMBL:CAB4261532.1};	--	--	PF07911.16:Protein of unknown function (DUF1677)	--	--	--
PmuVar_Chr8_1836	19.5245	20.8834	18.792	80.0556	72.4281	71.4878	481	585	519	2309	1745	1736	2.22208	2.74399e-124	1.78233e-122	up	Chr8	11209818	11211035	+	PmuVar_Chr8_1836	--	K09561 STIP1 homology and U-box containing protein 1 [EC:2.3.2.27] | (RefSeq) E3 ubiquitin-protein ligase CHIP (A)	ko04120: Ubiquitin mediated proteolysis; ko04141: Protein processing in endoplasmic reticulum	unnamed protein product [Prunus armeniaca]	PUB23_ARATH RecName: Full=E3 ubiquitin-protein ligase PUB23; EC=2.3.2.27; AltName: Full=Plant U-box protein 23; AltName: Full=RING-type E3 ubiquitin transferase PUB23 {ECO:0000305}; AltName: Full=U-box domain-containing protein 23;	A0A6J5Y0C1_PRUAR RecName: Full=RING-type E3 ubiquitin transferase {ECO:0000256|ARBA:ARBA00012483}; EC=2.3.2.27 {ECO:0000256|ARBA:ARBA00012483};	--	GO:0005829,cytosol; GO:0061630,ubiquitin protein ligase activity; GO:0004842,ubiquitin-protein transferase activity; GO:0006952,defense response; GO:0051865,protein autoubiquitination; GO:0016567,protein ubiquitination; GO:0002679,respiratory burst involved in defense response; GO:0009414,response to water deprivation; GO:0003674,molecular_function; GO:0003824,catalytic activity; GO:0016740,trans…	PF04564.18:U-box domain	--	--	--
PmuVar_Chr1_2365	398.021	377.487	404.931	916.82	920.362	839.915	4782	5157	5454	12896	10814	9947	1.48314	4.27331e-124	2.76406e-122	up	Chr1	18940066	18940907	-	PmuVar_Chr1_2365	--	K14484 auxin-responsive protein IAA | (RefSeq) auxin-responsive protein IAA4-like (A)	ko04075: Plant hormone signal transduction	PREDICTED: auxin-responsive protein IAA4-like [Prunus mume]	AX22B_VIGRR RecName: Full=Auxin-induced protein 22B; AltName: Full=Indole-3-acetic acid-induced protein ARG4;	A0A6J5XPW0_PRUAR RecName: Full=Auxin-responsive protein {ECO:0000256|RuleBase:RU004549};	--	GO:0005634,nucleus; GO:0009734,auxin-activated signaling pathway; GO:0006355,regulation of transcription, DNA-templated; GO:0007154,cell communication; GO:0007165,signal transduction; GO:0008150,biological_process; GO:0009719,response to endogenous stimulus; GO:0009725,response to hormone; GO:0009733,response to auxin; GO:0009755,hormone-mediated signaling pathway; GO:0009987,cellular process; GO…	PF02309.19:AUX/IAA family	AUX/IAA	TR	AUX/IAA
PmuVar_Chr5_0522	4.9357	6.4742	6.5667	69.5964	59.6217	57.0311	59	88	88	974	697	672	3.67146	7.49413e-123	4.82715e-121	up	Chr5	5809113	5812842	+	PmuVar_Chr5_0522	--	--	--	hypothetical protein L3X38_010195 [Prunus dulcis]	--	A0A5E4FPY2_PRUDU SubName: Full=Uncharacterized protein {ECO:0000313|EMBL:VVA29559.1};	--	--	--	--	--	--
PmuVar_Chr4_1828	318.955	328.591	333.663	805.463	752.699	817.513	3774	4421	4426	11158	8710	9535	1.57873	1.41157e-122	9.05458e-121	up	Chr4	16218109	16219355	+	PmuVar_Chr4_1828	--	K00789 S-adenosylmethionine synthetase [EC:2.5.1.6] | (RefSeq) S-adenosylmethionine synthase 1 (A)	ko00270: Cysteine and methionine metabolism; ko00999: Biosynthesis of various plant secondary metabolites; ko01100: Metabolic pathways; ko01110: Biosynthesis of secondary metabolites; ko01230: Biosynthesis of amino acids; ko01240: Biosynthesis of cofactors	PREDICTED: S-adenosylmethionine synthase 1 [Prunus mume]	METK1_ELAUM RecName: Full=S-adenosylmethionine synthase 1; Short=AdoMet synthase 1; EC=2.5.1.6 {ECO:0000250|UniProtKB:Q96551}; AltName: Full=Methionine adenosyltransferase 1; Short=MAT 1;	A0A6J5U647_PRUAR RecName: Full=S-adenosylmethionine synthase {ECO:0000256|RuleBase:RU000541}; EC=2.5.1.6 {ECO:0000256|RuleBase:RU000541};	S-adenosylmethionine synthetase	GO:0005737,cytoplasm; GO:0005524,ATP binding; GO:0046872,metal ion binding; GO:0004478,methionine adenosyltransferase activity; GO:0006730,one-carbon metabolic process; GO:0006556,S-adenosylmethionine biosynthetic process; GO:0000166,nucleotide binding; GO:0003674,molecular_function; GO:0005488,binding; GO:0017076,purine nucleotide binding; GO:0030554,adenyl nucleotide binding; GO:0032553,ribonuc…	PF00438.23:S-adenosylmethionine synthetase, N-terminal domain	--	--	--
PmuVar_Chr8_1470	2.0366	2.2388	2.8445	19.1806	20.852	19.3015	76	95	119	838	761	710	3.35692	1.78308e-122	1.13904e-120	up	Chr8	8604046	8607497	-	PmuVar_Chr8_1470	--	--	--	PREDICTED: uncharacterized protein LOC103339936 [Prunus mume]	--	A0A6P5TD20_PRUAV SubName: Full=uncharacterized protein LOC110766102 {ECO:0000313|RefSeq:XP_021825056.1};	--	--	PF04784.17:Protein of unknown function, DUF547	--	--	--
PmuVar_Chr2_4443	22.6046	23.209	19.9151	86.0282	86.99	82.1826	406	474	401	1809	1528	1455	2.25878	4.8355e-122	3.07622e-120	up	Chr2	32154065	32160744	+	PmuVar_Chr2_4443	--	K14504 xyloglucan:xyloglucosyl transferase TCH4 [EC:2.4.1.207] | (RefSeq) xyloglucan endotransglucosylase/hydrolase protein 22-like (A)	ko04075: Plant hormone signal transduction	unnamed protein product [Prunus armeniaca]	XTH23_ARATH RecName: Full=Probable xyloglucan endotransglucosylase/hydrolase protein 23; Short=At-XTH23; Short=XTH-23; EC=2.4.1.207; Flags: Precursor;	A0A6J5TEC3_PRUAR RecName: Full=Xyloglucan endotransglucosylase/hydrolase {ECO:0000256|RuleBase:RU361120}; EC=2.4.1.207 {ECO:0000256|RuleBase:RU361120};	--	GO:0048046,apoplast; GO:0005794,Golgi apparatus; GO:0004553,hydrolase activity, hydrolyzing O-glycosyl compounds; GO:0030247,polysaccharide binding; GO:0016762,xyloglucan:xyloglucosyl transferase activity; GO:0042546,cell wall biogenesis; GO:0071555,cell wall organization; GO:0010411,xyloglucan metabolic process; GO:0003674,molecular_function; GO:0003824,catalytic activity; GO:0016787,hydrolase a…	PF00722.24:Glycosyl hydrolases family 16	--	--	--
PmuVar_Chr3_0853	13.8887	14.8139	14.6643	61.4592	59.0008	53.3198	343	416	406	1777	1425	1298	2.30418	5.9095e-122	3.73462e-120	up	Chr3	5148569	5150811	-	PmuVar_Chr3_0853	--	K00162 pyruvate dehydrogenase E1 component beta subunit [EC:1.2.4.1] | (RefSeq) pyruvate dehydrogenase E1 component subunit beta-3, chloroplastic-like (A)	ko00010: Glycolysis / Gluconeogenesis; ko00020: Citrate cycle (TCA cycle); ko00620: Pyruvate metabolism; ko01100: Metabolic pathways; ko01110: Biosynthesis of secondary metabolites; ko01200: Carbon metabolism	PREDICTED: pyruvate dehydrogenase E1 component subunit beta-3, chloroplastic-like [Prunus mume]	ODPB3_ARATH RecName: Full=Pyruvate dehydrogenase E1 component subunit beta-3, chloroplastic; EC=1.2.4.1; Flags: Precursor;	A0A6J5UMN7_PRUAR RecName: Full=Pyruvate dehydrogenase E1 component subunit beta {ECO:0000256|RuleBase:RU364074}; EC=1.2.4.1 {ECO:0000256|RuleBase:RU364074};	Pyruvate dehydrogenase E1, beta subunit	GO:0009941,chloroplast envelope; GO:0005783,endoplasmic reticulum; GO:0004739,pyruvate dehydrogenase (acetyl-transferring) activity; GO:0008270,zinc ion binding; GO:0006086,acetyl-CoA biosynthetic process from pyruvate; GO:0006096,glycolytic process; GO:0048868,pollen tube development; GO:0003674,molecular_function; GO:0003824,catalytic activity; GO:0004738,pyruvate dehydrogenase activity; GO:001…	PF02779.27:Transketolase, pyrimidine binding domain	--	--	--
PmuVar_Chr8_1331	3.4712	2.7104	3.9066	26.0747	27.6324	24.5847	107	95	135	941	833	747	3.25979	5.91877e-122	3.73462e-120	up	Chr8	7642052	7643743	-	PmuVar_Chr8_1331	--	K08150 MFS transporter, SP family, solute carrier family 2 (myo-inositol transporter), member 13 | (RefSeq) inositol transporter 1 isoform X1 (A)	--	PREDICTED: probable polyol transporter 6 [Prunus mume]	PLT6_ARATH RecName: Full=Probable polyol transporter 6;	A0A6J5Y3C6_PRUAR RecName: Full=MFS domain-containing protein {ECO:0000259|PROSITE:PS50850};	Predicted transporter (major facilitator superfamily)	GO:0016021,integral component of membrane; GO:0005351,carbohydrate:proton symporter activity; GO:0003674,molecular_function; GO:0005215,transporter activity; GO:0005402,carbohydrate:cation symporter activity; GO:0008324,cation transmembrane transporter activity; GO:0008509,anion transmembrane transporter activity; GO:0015075,ion transmembrane transporter activity; GO:0015078,proton transmembrane …	PF00083.27:Sugar (and other) transporter	--	--	--
PmuVar_Chr4_3207	79.5437	78.1114	80.2615	180.165	194.088	180.884	1921	2145	2173	5094	4584	4306	1.52371	3.64043e-121	2.2877e-119	up	Chr4	25037127	25039428	-	PmuVar_Chr4_3207	--	K02291 15-cis-phytoene synthase [EC:2.5.1.32] | (RefSeq) phytoene synthase 2, chloroplastic-like (A)	ko00906: Carotenoid biosynthesis; ko01100: Metabolic pathways; ko01110: Biosynthesis of secondary metabolites	phytoene synthase 2, chloroplastic [Prunus persica]	PSY_DAUCA RecName: Full=Phytoene synthase, chloroplastic; EC=2.5.1.32; Flags: Precursor;	A0A6J5WVT7_PRUAR RecName: Full=15-cis-phytoene synthase {ECO:0000256|ARBA:ARBA00012396}; EC=2.5.1.32 {ECO:0000256|ARBA:ARBA00012396};	Squalene synthetase	GO:0009507,chloroplast; GO:0004311,farnesyltranstransferase activity; GO:0016767,geranylgeranyl-diphosphate geranylgeranyltransferase activity; GO:0016117,carotenoid biosynthetic process; GO:0003674,molecular_function; GO:0003824,catalytic activity; GO:0004659,prenyltransferase activity; GO:0016740,transferase activity; GO:0016765,transferase activity, transferring alkyl or aryl (other than methy…	PF00494.22:Squalene/phytoene synthase	--	--	--
PmuVar_Chr2_3575	62.4272	64.2073	59.3664	145.738	158.808	156.994	2466	2884	2629	6740	6135	6113	1.6123	7.8194e-121	4.89393e-119	up	Chr2	25054958	25057360	+	PmuVar_Chr2_3575	--	K14638 solute carrier family 15 (peptide/histidine transporter), member 3/4 | (RefSeq) protein NRT1/ PTR FAMILY 8.1-like isoform X1 (A)	--	PREDICTED: protein NRT1/ PTR FAMILY 6.1 [Prunus mume]	PTR49_ARATH RecName: Full=Protein NRT1/ PTR FAMILY 6.1; Short=AtNPF6.1;	A0A6J5TLM7_PRUAR SubName: Full=Uncharacterized protein {ECO:0000313|EMBL:CAB4263905.1};	H+/oligopeptide symporter	GO:0016021,integral component of membrane; GO:0022857,transmembrane transporter activity; GO:0006857,oligopeptide transport; GO:0003674,molecular_function; GO:0005215,transporter activity; GO:0006810,transport; GO:0006811,ion transport; GO:0006820,anion transport; GO:0008150,biological_process; GO:0015833,peptide transport; GO:0042886,amide transport; GO:0051179,localization; GO:0051234,establish…	PF00854.24:POT family	--	--	--
PmuVar_Chr4_1100	176.802	170.122	173.622	458.442	430.285	411.643	2210	2418	2433	6709	5260	5072	1.62327	1.17195e-120	7.30531e-119	up	Chr4	10529101	10530366	-	PmuVar_Chr4_1100	--	K14484 auxin-responsive protein IAA | (RefSeq) auxin-responsive protein IAA1 (A)	ko04075: Plant hormone signal transduction	unnamed protein product [Prunus armeniaca]	IAA17_ARATH RecName: Full=Auxin-responsive protein IAA17; AltName: Full=Auxin response 3; AltName: Full=Indoleacetic acid-induced protein 17;	A0A6J5U8Z6_PRUAR RecName: Full=Auxin-responsive protein {ECO:0000256|RuleBase:RU004549};	--	GO:0005634,nucleus; GO:0003700,DNA-binding transcription factor activity; GO:0042802,identical protein binding; GO:0009734,auxin-activated signaling pathway; GO:1900057,positive regulation of leaf senescence; GO:0009733,response to auxin; GO:0003674,molecular_function; GO:0140110,transcription regulator activity; GO:0005488,binding; GO:0005515,protein binding; GO:0007154,cell communication; GO:00…	PF02309.19:AUX/IAA family	AUX/IAA	TR	AUX/IAA
PmuVar_Chr5_1852	22.7426	21.1024	18.405	98.7043	89.852	97.9729	345	364	313	1753	1333	1465	2.50681	4.80805e-120	2.98504e-118	up	Chr5	19648674	19650311	+	PmuVar_Chr5_1852	--	--	--	early nodulin-55-2-like [Prunus avium]	BCP_PEA RecName: Full=Blue copper protein; Flags: Precursor;	A0A6P5TF33_PRUAV SubName: Full=early nodulin-55-2-like {ECO:0000313|RefSeq:XP_021825806.1};	--	GO:0009055,electron transfer activity; GO:0046872,metal ion binding; GO:0003674,molecular_function; GO:0003824,catalytic activity; GO:0016491,oxidoreductase activity; GO:0005488,binding; GO:0043167,ion binding; GO:0043169,cation binding	PF02298.20:Plastocyanin-like domain	--	--	--
PmuVar_Chr3_0315	98.6894	88.1963	98.8007	256.705	248.722	252.663	1545	1570	1734	4705	3808	3899	1.71104	3.37478e-119	2.08683e-117	up	Chr3	1862022	1864267	+	PmuVar_Chr3_0315	--	--	--	PREDICTED: protein PLANT CADMIUM RESISTANCE 12 [Prunus mume]	PCR7_ARATH RecName: Full=Protein PLANT CADMIUM RESISTANCE 7; Short=AtPCR7;	A0A5E4G4Z6_PRUDU SubName: Full=PREDICTED: PLANT CADMIUM RESISTANCE {ECO:0000313|EMBL:VVA34804.1};	--	GO:0016021,integral component of membrane; GO:0005575,cellular_component; GO:0016020,membrane; GO:0031224,intrinsic component of membrane; GO:0110165,cellular anatomical entity	PF04749.20:PLAC8 family	--	--	--
PmuVar_Chr6_1665	30.1759	30.5529	27.7547	2.2677	2.1851	2.2007	932	1073	961	82	66	67	-3.42998	1.13925e-118	7.01661e-117	down	Chr6	12430411	12433240	+	PmuVar_Chr6_1665	--	K24917 amino acid permease | (RefSeq) amino acid permease 3-like (A)	--	unnamed protein product [Prunus armeniaca]	LHTL8_ARATH RecName: Full=Lysine histidine transporter-like 8; AltName: Full=Amino acid transporter-like protein 1;	A0A6J5VTL3_PRUAR RecName: Full=Aa_trans domain-containing protein {ECO:0000259|Pfam:PF01490};	Amino acid transporters	GO:0016021,integral component of membrane; GO:0016020,membrane; GO:0005886,plasma membrane; GO:0015171,amino acid transmembrane transporter activity; GO:0003333,amino acid transmembrane transport; GO:0003674,molecular_function; GO:0005215,transporter activity; GO:0005342,organic acid transmembrane transporter activity; GO:0008509,anion transmembrane transporter activity; GO:0015075,ion transmembr…	PF01490.21:Transmembrane amino acid transporter protein	--	--	--
PmuVar_Chr6_1240	0.123	0.0961	0.0122	16.3759	20.191	20.0045	9	8	1	1403	1445	1443	8.26356	1.37626e-118	8.4427e-117	up	Chr6	9959852	9967103	-	PmuVar_Chr6_1240	--	K17756 long-chain-alcohol oxidase [EC:1.1.3.20] | (RefSeq) long-chain-alcohol oxidase FAO1 (A)	--	PREDICTED: uncharacterized protein LOC103334570 [Prunus mume]	FAO1_ARATH RecName: Full=Long-chain-alcohol oxidase FAO1; EC=1.1.3.20; AltName: Full=Long-chain fatty alcohol oxidase 1;	A0A6J5YBD2_PRUAR RecName: Full=(R)-mandelonitrile lyase {ECO:0000256|ARBA:ARBA00013074}; EC=4.1.2.10 {ECO:0000256|ARBA:ARBA00013074};	--	GO:0016021,integral component of membrane; GO:0050660,flavin adenine dinucleotide binding; GO:0046577,long-chain-alcohol oxidase activity; GO:0000166,nucleotide binding; GO:0003674,molecular_function; GO:0005488,binding; GO:0036094,small molecule binding; GO:0043167,ion binding; GO:0043168,anion binding; GO:0097159,organic cyclic compound binding; GO:1901265,nucleoside phosphate binding; GO:19013…	PF00732.22:GMC oxidoreductase	--	--	--
PmuVar_Chr2_1883	14.6539	14.9141	13.3429	79.1848	65.5384	87.0355	337	390	344	2132	1474	1973	2.73789	2.2103e-118	1.35055e-116	up	Chr2	13779032	13780168	-	PmuVar_Chr2_1883	--	K20893 probable galacturonosyltransferase-like 1 [EC:2.4.1.-] | (RefSeq) LOW QUALITY PROTEIN: probable galacturonosyltransferase-like 1 (A)	--	probable galacturonosyltransferase-like 1 [Prunus avium]	GATL1_ARATH RecName: Full=Probable galacturonosyltransferase-like 1; EC=2.4.1.-; AltName: Full=Protein GAOLAOZHUANGREN 1; AltName: Full=Protein PARVUS;	A0A6P5SVU0_PRUAV RecName: Full=Hexosyltransferase {ECO:0000256|RuleBase:RU362027}; EC=2.4.1.- {ECO:0000256|RuleBase:RU362027};	--	GO:0005783,endoplasmic reticulum; GO:0005789,endoplasmic reticulum membrane; GO:0005794,Golgi apparatus; GO:0016021,integral component of membrane; GO:0047262,polygalacturonate 4-alpha-galacturonosyltransferase activity; GO:0052386,cell wall thickening; GO:0010417,glucuronoxylan biosynthetic process; GO:0048366,leaf development; GO:0032504,multicellular organism reproduction; GO:0045489,pectin bi…	PF01501.23:Glycosyl transferase family 8	--	--	--
PmuVar_Chr2_1804	9.5448	10.7493	10.7191	67.6258	58.6993	69.9409	139	178	175	1153	836	1004	2.96429	2.26293e-118	1.37727e-116	up	Chr2	13271549	13272351	-	PmuVar_Chr2_1804	--	--	--	NDR1/HIN1-like protein 2 [Prunus yedoensis var. nudiflora]	NHL13_ARATH RecName: Full=NDR1/HIN1-like protein 13 {ECO:0000303|PubMed:26206852};	A0A314UP94_PRUYE SubName: Full=NDR1/HIN1-like protein 2 {ECO:0000313|EMBL:PQM38424.1};	--	GO:0016021,integral component of membrane; GO:0005886,plasma membrane; GO:0009506,plasmodesma; GO:0042742,defense response to bacterium; GO:0006950,response to stress; GO:0006952,defense response; GO:0008150,biological_process; GO:0009605,response to external stimulus; GO:0009607,response to biotic stimulus; GO:0009617,response to bacterium; GO:0043207,response to external biotic stimulus; GO:004…	PF03168.16:Late embryogenesis abundant protein	--	--	--
PmuVar_Chr8_0167	168.452	163.051	169.869	378.034	359.536	385.405	6092	6705	6887	16006	12716	13739	1.46632	5.96271e-118	3.6148e-116	up	Chr8	1064365	1068719	+	PmuVar_Chr8_0167	--	K00297 methylenetetrahydrofolate reductase (NADH) [EC:1.5.1.54] | (RefSeq) methylenetetrahydrofolate reductase 2-like (A)	ko00670: One carbon pool by folate; ko01100: Metabolic pathways; ko01200: Carbon metabolism	PREDICTED: methylenetetrahydrofolate reductase 2-like [Prunus mume]	MTHR2_ARATH RecName: Full=Methylenetetrahydrofolate reductase 2; Short=AtMTHFR2; EC=1.5.1.20;	A0A6J5VIL1_PRUAR RecName: Full=Methylenetetrahydrofolate reductase {ECO:0000256|RuleBase:RU003862}; EC=1.5.1.20 {ECO:0000256|RuleBase:RU003862};	5,10-methylenetetrahydrofolate reductase	GO:0005829,cytosol; GO:0071949,FAD binding; GO:0004489,methylenetetrahydrofolate reductase (NAD(P)H) activity; GO:0106312,methylenetetrahydrofolate reductase NADH activity; GO:0106313,methylenetetrahydrofolate reductase NADPH activity; GO:0009086,methionine biosynthetic process; GO:0035999,tetrahydrofolate interconversion; GO:0000166,nucleotide binding; GO:0003674,molecular_function; GO:0005488,b…	PF02219.20:Methylenetetrahydrofolate reductase	--	--	--
PmuVar_Chr7_2169	50.1332	45.3585	49.5078	122.793	123.036	116.359	1737	1787	1923	4981	4169	3974	1.62308	1.01955e-117	6.1567e-116	up	Chr7	15992571	15999468	+	PmuVar_Chr7_2169	--	K15639 PHYB activation tagged suppressor 1 [EC:1.14.-.-] | (RefSeq) cytochrome P450 734A1 (A)	ko00905: Brassinosteroid biosynthesis; ko01110: Biosynthesis of secondary metabolites	cytochrome P450 CYP749A22-like isoform X1 [Prunus avium]	C7A22_PANGI RecName: Full=Cytochrome P450 CYP749A22; EC=1.14.-.-; AltName: Full=Cytochrome P450 CYP749A20;	A0A6P5TDE0_PRUAV SubName: Full=cytochrome P450 CYP749A22-like isoform X1 {ECO:0000313|RefSeq:XP_021825112.1};	Cytochrome P450 CYP4/CYP19/CYP26 subfamilies	GO:0016021,integral component of membrane; GO:0020037,heme binding; GO:0005506,iron ion binding; GO:0004497,monooxygenase activity; GO:0016705,oxidoreductase activity, acting on paired donors, with incorporation or reduction of molecular oxygen; GO:0003674,molecular_function; GO:0005488,binding; GO:0046906,tetrapyrrole binding; GO:0097159,organic cyclic compound binding; GO:1901363,heterocyclic c…	PF00067.25:Cytochrome P450	--	--	--
PmuVar_Chr1_1446	9.221	7.5055	9.1003	73.5664	66.4028	67.8709	94	87	104	878	662	682	3.31484	1.93169e-117	1.16195e-115	up	Chr1	13458460	13458963	-	PmuVar_Chr1_1446	--	--	--	PREDICTED: cyclin-dependent protein kinase inhibitor SMR3 [Prunus mume]	--	A0A6J5V8I8_PRUAR SubName: Full=Uncharacterized protein {ECO:0000313|EMBL:CAB4284492.1};	--	GO:0032875,regulation of DNA endoreduplication; GO:0006260,DNA replication; GO:0006261,DNA-dependent DNA replication; GO:0006275,regulation of DNA replication; GO:0007049,cell cycle; GO:0008150,biological_process; GO:0008152,metabolic process; GO:0009058,biosynthetic process; GO:0009059,macromolecule biosynthetic process; GO:0009889,regulation of biosynthetic process; GO:0009987,cellular process;…	--	--	--	--
PmuVar_Chr8_0716	44.5261	39.9779	42.8543	0.3619	0.6498	0.4298	1051	1073	1134	10	15	10	-6.18322	2.5675e-117	1.53841e-115	down	Chr8	3986236	3988746	-	PmuVar_Chr8_0716	--	K00469 inositol oxygenase [EC:1.13.99.1] | (RefSeq) inositol oxygenase 1 (A)	ko00053: Ascorbate and aldarate metabolism; ko00562: Inositol phosphate metabolism; ko01100: Metabolic pathways; ko01250: Biosynthesis of nucleotide sugars	hypothetical protein GBA52_022747 [Prunus armeniaca]	MIOX2_ARATH RecName: Full=Inositol oxygenase 2 {ECO:0000303|PubMed:15660207}; EC=1.13.99.1 {ECO:0000250|UniProtKB:Q8H1S0, ECO:0000305|PubMed:15660207}; AltName: Full=Myo-inositol oxygenase 2; Short=AtMIOX2; Short=MI oxygenase 2;	A0A6P5RX09_PRUAV RecName: Full=Inositol oxygenase {ECO:0000256|ARBA:ARBA00011919, ECO:0000256|RuleBase:RU367039}; EC=1.13.99.1 {ECO:0000256|ARBA:ARBA00011919, ECO:0000256|RuleBase:RU367039}; AltName: Full=Myo-inositol oxygenase {ECO:0000256|RuleBase:RU367039};	Aldehyde reductase	GO:0005737,cytoplasm; GO:0050113,inositol oxygenase activity; GO:0005506,iron ion binding; GO:0019310,inositol catabolic process; GO:0019853,L-ascorbic acid biosynthetic process; GO:0003674,molecular_function; GO:0003824,catalytic activity; GO:0016491,oxidoreductase activity; GO:0016701,oxidoreductase activity, acting on single donors with incorporation of molecular oxygen; GO:0005488,binding; GO…	PF05153.18:Myo-inositol oxygenase	--	--	--
PmuVar_Chr8_1371	30.9292	30.8137	27.9597	95.3415	93.6035	93.1952	670	759	679	2418	1983	1990	1.9555	2.5799e-117	1.53987e-115	up	Chr8	7862115	7863185	+	PmuVar_Chr8_1371	--	K20893 probable galacturonosyltransferase-like 1 [EC:2.4.1.-] | (RefSeq) probable galacturonosyltransferase-like 1 (A)	--	probable galacturonosyltransferase-like 1 [Prunus persica]	GATL1_ARATH RecName: Full=Probable galacturonosyltransferase-like 1; EC=2.4.1.-; AltName: Full=Protein GAOLAOZHUANGREN 1; AltName: Full=Protein PARVUS;	M5VQE0_PRUPE RecName: Full=Hexosyltransferase {ECO:0000256|RuleBase:RU362027}; EC=2.4.1.- {ECO:0000256|RuleBase:RU362027};	--	GO:0005783,endoplasmic reticulum; GO:0005789,endoplasmic reticulum membrane; GO:0005794,Golgi apparatus; GO:0016021,integral component of membrane; GO:0047262,polygalacturonate 4-alpha-galacturonosyltransferase activity; GO:0052386,cell wall thickening; GO:0010417,glucuronoxylan biosynthetic process; GO:0048366,leaf development; GO:0032504,multicellular organism reproduction; GO:0045489,pectin bi…	PF01501.23:Glycosyl transferase family 8	--	--	--
PmuVar_Chr1_1164	36.4825	36.635	36.3827	121.637	106.578	117.209	839	958	938	3275	2397	2657	1.961	2.93653e-117	1.74599e-115	up	Chr1	11792596	11795294	+	PmuVar_Chr1_1164	--	K01102 pyruvate dehydrogenase phosphatase [EC:3.1.3.43] | (RefSeq) probable protein phosphatase 2C 78 (A)	--	PREDICTED: probable protein phosphatase 2C 78 [Prunus mume]	P2C78_ORYSJ RecName: Full=Probable protein phosphatase 2C 78; Short=OsPP2C78; EC=3.1.3.16;	A0A6J5XS00_PRUAR RecName: Full=Protein-serine/threonine phosphatase {ECO:0000256|ARBA:ARBA00013081}; EC=3.1.3.16 {ECO:0000256|ARBA:ARBA00013081};	Protein phosphatase 2C/pyruvate dehydrogenase (lipoamide) phosphatase	GO:0046872,metal ion binding; GO:0017018,myosin phosphatase activity; GO:0004722,protein serine/threonine phosphatase activity; GO:0035970,peptidyl-threonine dephosphorylation; GO:0003674,molecular_function; GO:0005488,binding; GO:0043167,ion binding; GO:0043169,cation binding; GO:0003824,catalytic activity; GO:0004721,phosphoprotein phosphatase activity; GO:0016787,hydrolase activity; GO:0016788…	PF00481.24:Protein phosphatase 2C	--	--	--
PmuVar_Chr2_5168	7.3077	6.7813	9.4407	50.2793	47.0501	51.3839	145	153	210	1168	913	1005	2.96307	5.10498e-117	3.02368e-115	up	Chr2	37738254	37739234	-	PmuVar_Chr2_5168	--	K14493 gibberellin receptor GID1 [EC:3.-.-.-] | (RefSeq) gibberellin receptor GID1C (A)	ko04075: Plant hormone signal transduction	PREDICTED: 2-hydroxyisoflavanone dehydratase-like [Prunus mume]	HIDM_GLYEC RecName: Full=2-hydroxyisoflavanone dehydratase; EC=3.1.1.1; EC=4.2.1.105; AltName: Full=Carboxylesterase HIDM;	M5XD54_PRUPE RecName: Full=Abhydrolase_3 domain-containing protein {ECO:0000259|Pfam:PF07859};	Arylacetamide deacetylase	GO:0033987,2-hydroxyisoflavanone dehydratase activity; GO:0052689,carboxylic ester hydrolase activity; GO:0080030,methyl indole-3-acetate esterase activity; GO:0009813,flavonoid biosynthetic process; GO:0009717,isoflavonoid biosynthetic process; GO:0046287,isoflavonoid metabolic process; GO:0003674,molecular_function; GO:0003824,catalytic activity; GO:0016829,lyase activity; GO:0016835,carbon-oxy…	PF07859.16:alpha/beta hydrolase fold	--	--	--
PmuVar_Chr7_1517	3.744	2.9986	3.1011	26.4684	23.5852	26.6553	112	102	104	927	690	786	3.26992	5.31669e-117	3.13705e-115	up	Chr7	10446219	10450494	-	PmuVar_Chr7_1517	--	K05929 phosphoethanolamine N-methyltransferase [EC:2.1.1.103] | (RefSeq) phosphoethanolamine N-methyltransferase 1 (A)	ko00564: Glycerophospholipid metabolism	PREDICTED: phosphoethanolamine N-methyltransferase 1 [Prunus mume]	PEAM1_ARATH RecName: Full=Phosphoethanolamine N-methyltransferase 1; Short=AtNMT1; Short=PEAMT 1; EC=2.1.1.103; AltName: Full=Protein XIPOTL 1;	A0A6J5XCY9_PRUAR RecName: Full=Methyltransf_11 domain-containing protein {ECO:0000259|Pfam:PF08241};	SAM-dependent methyltransferases	GO:0005737,cytoplasm; GO:0008168,methyltransferase activity; GO:0000234,phosphoethanolamine N-methyltransferase activity; GO:0052667,phosphomethylethanolamine N-methyltransferase activity; GO:0042425,choline biosynthetic process; GO:0032259,methylation; GO:0006656,phosphatidylcholine biosynthetic process; GO:0009555,pollen development; GO:0009860,pollen tube growth; GO:0010183,pollen tube guidanc…	PF08241.15:Methyltransferase domain	--	--	--
PmuVar_Chr4_2066	76.6545	75.1369	83.3026	9.6004	5.6911	6.6729	2121	2364	2584	311	154	182	-3.10714	8.74634e-117	5.14105e-115	down	Chr4	17645655	17654613	-	PmuVar_Chr4_2066	--	K10597 ubiquitin conjugation factor E4 B [EC:2.3.2.27] | (RefSeq) probable ubiquitin conjugation factor E4 (A)	ko04120: Ubiquitin mediated proteolysis; ko04141: Protein processing in endoplasmic reticulum	probable ubiquitin conjugation factor E4 isoform X2 [Prunus dulcis]	UBE4_ARATH RecName: Full=Probable ubiquitin conjugation factor E4; EC=2.3.2.27 {ECO:0000250|UniProtKB:P54860, ECO:0000250|UniProtKB:Q9ES00}; AltName: Full=Plant U-box protein 1; AltName: Full=RING-type E3 ubiquitin transferase E4; AltName: Full=U-box domain-containing protein 1; AltName: Full=Ubiquitin-fusion degradation protein 2-like; Short=UB fusion protein 2-like;	A0A314Y1D5_PRUYE SubName: Full=Putative ubiquitin conjugation factor E4 {ECO:0000313|EMBL:PQP99109.1};	Ubiquitin fusion degradation protein-2	GO:0005737,cytoplasm; GO:0005634,nucleus; GO:0000151,ubiquitin ligase complex; GO:0061630,ubiquitin protein ligase activity; GO:0034450,ubiquitin-ubiquitin ligase activity; GO:0000209,protein polyubiquitination; GO:0016567,protein ubiquitination; GO:0030433,ubiquitin-dependent ERAD pathway; GO:0006511,ubiquitin-dependent protein catabolic process; GO:0003674,molecular_function; GO:0003824,catalyt…	PF10408.12:Ubiquitin elongating factor core	--	--	--
PmuVar_Chr1_3107	5.1448	5.8856	6.063	23.5799	25.7691	26.3514	246	320	325	1320	1205	1242	2.44665	8.86865e-117	5.1932e-115	up	Chr1	24039534	24045075	+	PmuVar_Chr1_3107	--	K13436 pto-interacting protein 1 [EC:2.7.11.1] | (RefSeq) pto-interacting protein 1 (A)	ko04626: Plant-pathogen interaction	hypothetical protein GBA52_021429 [Prunus armeniaca]	Y3565_ARATH RecName: Full=Probable inactive receptor-like protein kinase At3g56050; Flags: Precursor;	A0A6J5XL07_PRUAR RecName: Full=Protein kinase domain-containing protein {ECO:0000259|PROSITE:PS50011};	Serine/threonine protein kinase	GO:0016021,integral component of membrane; GO:0005886,plasma membrane; GO:0005524,ATP binding; GO:0004672,protein kinase activity; GO:0006468,protein phosphorylation; GO:0000166,nucleotide binding; GO:0003674,molecular_function; GO:0005488,binding; GO:0017076,purine nucleotide binding; GO:0030554,adenyl nucleotide binding; GO:0032553,ribonucleotide binding; GO:0032555,purine ribonucleotide bindin…	PF07714.20:Protein tyrosine and serine/threonine kinase	--	--	--
PmuVar_Chr5_2733	224.378	215.656	218.736	768.212	672.899	900.917	6331	6919	6919	25377	18568	25057	2.13456	1.11816e-116	6.52291e-115	up	Chr5	25672624	25675186	-	PmuVar_Chr5_2733	--	K19891 glucan endo-1,3-beta-glucosidase 1/2/3 [EC:3.2.1.39] | (RefSeq) glucan endo-1,3-beta-glucosidase 3 isoform X1 (A)	ko00500: Starch and sucrose metabolism; ko01100: Metabolic pathways	PREDICTED: glucan endo-1,3-beta-glucosidase-like [Prunus mume]	E13B_WHEAT RecName: Full=Glucan endo-1,3-beta-glucosidase; EC=3.2.1.39; AltName: Full=(1->3)-beta-glucan endohydrolase; Short=(1->3)-beta-glucanase; AltName: Full=Beta-1,3-endoglucanase; Flags: Precursor;	A0A314Y4Z5_PRUYE RecName: Full=Glucan endo-1,3-beta-D-glucosidase {ECO:0000256|ARBA:ARBA00012780}; EC=3.2.1.39 {ECO:0000256|ARBA:ARBA00012780}; AltName: Full=(1->3)-beta-glucan endohydrolase {ECO:0000256|ARBA:ARBA00033335}; AltName: Full=Beta-1,3-endoglucanase {ECO:0000256|ARBA:ARBA00033417};	--	GO:0046658,anchored component of plasma membrane; GO:0042973,glucan endo-1,3-beta-D-glucosidase activity; GO:0005975,carbohydrate metabolic process; GO:0006952,defense response; GO:0003674,molecular_function; GO:0003824,catalytic activity; GO:0004553,hydrolase activity, hydrolyzing O-glycosyl compounds; GO:0008422,beta-glucosidase activity; GO:0015926,glucosidase activity; GO:0016787,hydrolase ac…	PF00332.21:Glycosyl hydrolases family 17	--	--	--
PmuVar_Chr1_1447	27.1778	23.9014	24.3718	87.8751	86.2775	81.2481	564	564	567	2135	1751	1662	2.0624	1.7562e-115	1.02064e-113	up	Chr1	13465671	13467545	+	PmuVar_Chr1_1447	--	K10355 actin, other eukaryote | (RefSeq) actin (A)	--	actin [Prunus yedoensis var. nudiflora]	ACT1_ORYSI RecName: Full=Actin-1;	A0A314YPV6_PRUYE SubName: Full=Actin {ECO:0000313|EMBL:PQQ06854.1};	Actin and related proteins	GO:0005737,cytoplasm; GO:0005856,cytoskeleton; GO:0005524,ATP binding; GO:0000166,nucleotide binding; GO:0003674,molecular_function; GO:0005488,binding; GO:0017076,purine nucleotide binding; GO:0030554,adenyl nucleotide binding; GO:0032553,ribonucleotide binding; GO:0032555,purine ribonucleotide binding; GO:0032559,adenyl ribonucleotide binding; GO:0035639,purine ribonucleoside triphosphate bindi…	PF00022.22:Actin	--	--	--
PmuVar_Chr2_2722	71.3521	67.0547	74.2391	10.0193	14.1696	11.2298	3455	3692	4030	568	671	536	-2.28859	6.15871e-115	3.56583e-113	down	Chr2	19160890	19166899	-	PmuVar_Chr2_2722	--	K09487 heat shock protein 90kDa beta | (RefSeq) heat shock protein 90-5, chloroplastic (A)	ko04141: Protein processing in endoplasmic reticulum; ko04626: Plant-pathogen interaction	unnamed protein product [Prunus armeniaca]	HS905_ARATH RecName: Full=Heat shock protein 90-5, chloroplastic {ECO:0000305}; Short=AtHSP90.5 {ECO:0000305}; Short=AtHsp90-5 {ECO:0000303|PubMed:11599565}; AltName: Full=Heat shock protein 88-1 {ECO:0000305}; Short=Hsp88-1 {ECO:0000303|PubMed:11599565}; AltName: Full=Hsp90C {ECO:0000303|PubMed:23382192}; AltName: Full=Protein EMBRYO DEFECTIVE 1956 {ECO:0000303|PubMed:23382192}; AltName: Full=Pr…	A0A6J5TMR3_PRUAR RecName: Full=HATPase_c domain-containing protein {ECO:0000259|SMART:SM00387};	Molecular chaperone (HSP90 family)	GO:0009507,chloroplast; GO:0009941,chloroplast envelope; GO:0009570,chloroplast stroma; GO:0005783,endoplasmic reticulum; GO:0005739,mitochondrion; GO:0048471,perinuclear region of cytoplasm; GO:0000325,plant-type vacuole; GO:0009536,plastid; GO:0005524,ATP binding; GO:0016887,ATPase activity; GO:0042803,protein homodimerization activity; GO:0051082,unfolded protein binding; GO:0009704,de-etiolat…	PF00183.21:Hsp90 protein	--	--	--
PmuVar_Chr6_2568	61.5376	54.2732	50.5133	314.624	278.049	242.069	351	352	323	2101	1551	1361	2.63098	4.081e-114	2.35404e-112	up	Chr6	19329124	19329405	+	PmuVar_Chr6_2568	--	K14488 SAUR family protein | (RefSeq) indole-3-acetic acid-induced protein ARG7-like (A)	ko04075: Plant hormone signal transduction	PREDICTED: indole-3-acetic acid-induced protein ARG7-like [Prunus mume]	ARG7_VIGRR RecName: Full=Indole-3-acetic acid-induced protein ARG7;	M5W1D5_PRUPE SubName: Full=Uncharacterized protein {ECO:0000313|EMBL:EMJ00600.1};	--	GO:0009733,response to auxin; GO:0008150,biological_process; GO:0009719,response to endogenous stimulus; GO:0009725,response to hormone; GO:0010033,response to organic substance; GO:0042221,response to chemical; GO:0050896,response to stimulus	PF02519.17:Auxin responsive protein	--	--	--
PmuVar_Chr3_3339	213.164	217.935	213.172	63.2722	64.7868	63.6961	6325	7353	7091	2198	1880	1863	-1.4467	5.21483e-114	2.99688e-112	down	Chr3	28262310	28276915	+	PmuVar_Chr3_3339	--	K01640 hydroxymethylglutaryl-CoA lyase [EC:4.1.3.4] | (RefSeq) hydroxymethylglutaryl-CoA lyase, mitochondrial (A)	ko00280: Valine, leucine and isoleucine degradation; ko00650: Butanoate metabolism; ko01100: Metabolic pathways; ko01110: Biosynthesis of secondary metabolites; ko04146: Peroxisome	hypothetical protein L3X38_025551 [Prunus dulcis]	HMGCL_ARATH RecName: Full=Hydroxymethylglutaryl-CoA lyase, mitochondrial; Short=HL; Short=HMG-CoA lyase; EC=4.1.3.4; AltName: Full=3-hydroxy-3-methylglutarate-CoA lyase;	A0A4Y1RDX1_PRUDU RecName: Full=Hydroxymethylglutaryl-CoA lyase {ECO:0000256|ARBA:ARBA00012910}; EC=4.1.3.4 {ECO:0000256|ARBA:ARBA00012910};	Hydroxymethylglutaryl-CoA lyase	GO:0005759,mitochondrial matrix; GO:0005739,mitochondrion; GO:0004419,hydroxymethylglutaryl-CoA lyase activity; GO:0046872,metal ion binding; GO:0046951,ketone body biosynthetic process; GO:0006552,leucine catabolic process; GO:0006629,lipid metabolic process; GO:0003674,molecular_function; GO:0003824,catalytic activity; GO:0016829,lyase activity; GO:0016830,carbon-carbon lyase activity; GO:00168…	PF00682.22:HMGL-like	--	--	--
PmuVar_Chr2_1018	41.9538	42.9419	40.7413	114.14	114.157	118.561	891	1037	970	2838	2371	2482	1.76718	4.31322e-113	2.46956e-111	up	Chr2	8304224	8305273	+	PmuVar_Chr2_1018	--	K15285 solute carrier family 35, member E3 | (RefSeq) UDP-galactose transporter 1 (A)	--	PREDICTED: probable sugar phosphate/phosphate translocator At5g25400 [Prunus mume]	PT525_ARATH RecName: Full=Probable sugar phosphate/phosphate translocator At5g25400;	M5XC34_PRUPE RecName: Full=TPT domain-containing protein {ECO:0000259|Pfam:PF03151};	Glucose-6-phosphate/phosphate and phosphoenolpyruvate/phosphate antiporter	GO:0005794,Golgi apparatus; GO:0016021,integral component of membrane; GO:0015297,antiporter activity; GO:0008643,carbohydrate transport; GO:0015780,nucleotide-sugar transmembrane transport; GO:0003674,molecular_function; GO:0005215,transporter activity; GO:0015291,secondary active transmembrane transporter activity; GO:0022804,active transmembrane transporter activity; GO:0022857,transmembrane t…	PF03151.19:Triose-phosphate Transporter family	--	--	--
PmuVar_Chr4_1293	339.352	343.419	347.359	83.5337	94.1467	77.8647	4386	5047	5033	1264	1190	992	-1.71088	7.66649e-113	4.37329e-111	down	Chr4	12006688	12007439	-	PmuVar_Chr4_1293	--	--	--	PREDICTED: uncharacterized protein LOC103327821 [Prunus mume]	OXS3_ARATH RecName: Full=Protein OXIDATIVE STRESS 3 {ECO:0000303|PubMed:18980652}; Short=AtOXS3 {ECO:0000303|PubMed:18980652};	A0A5E4ES73_PRUDU SubName: Full=Uncharacterized protein {ECO:0000313|EMBL:VVA18607.1};	Nuclear localization sequence binding protein	GO:0016607,nuclear speck; GO:0005634,nucleus; GO:2000028,regulation of photoperiodism, flowering; GO:2000070,regulation of response to water deprivation; GO:0046686,response to cadmium ion; GO:0046688,response to copper ion; GO:0010218,response to far red light; GO:0009416,response to light stimulus; GO:0006979,response to oxidative stress; GO:0010114,response to red light; GO:0009611,response to…	--	--	--	--
PmuVar_Chr5_2192	25.1985	28.9221	26.6774	78.5832	82.038	81.3555	685	894	813	2501	2181	2180	1.8832	1.00141e-112	5.69145e-111	up	Chr5	21978718	21980061	-	PmuVar_Chr5_2192	--	K21734 sphingolipid 8-(E/Z)-desaturase [EC:1.14.19.29] | (RefSeq) delta(8)-fatty-acid desaturase 1-like (A)	--	PREDICTED: delta(8)-fatty-acid desaturase 1-like [Prunus mume]	SLD1_ARATH RecName: Full=Delta(8)-fatty-acid desaturase 1; EC=1.14.19.29 {ECO:0000269|PubMed:22023480, ECO:0000269|PubMed:9786850}; AltName: Full=Delta(8)-sphingolipid desaturase 1; AltName: Full=Sphingoid long-chain base desaturase 1; Short=Sphingoid LCB desaturase 1; AltName: Full=Sphingolipid 8-(E/Z)-desaturase 1;	A0A6J5WFG2_PRUAR RecName: Full=Cytochrome b5 heme-binding domain-containing protein {ECO:0000259|PROSITE:PS50255};	Delta 6-fatty acid desaturase/delta-8 sphingolipid desaturase	GO:0005783,endoplasmic reticulum; GO:0005789,endoplasmic reticulum membrane; GO:0016021,integral component of membrane; GO:0046872,metal ion binding; GO:0016717,oxidoreductase activity, acting on paired donors, with oxidation of a pair of donors resulting in the reduction of molecular oxygen to two molecules of water; GO:0052631,sphingolipid delta-8 desaturase activity; GO:0070417,cellular respon…	PF00487.27:Fatty acid desaturase	--	--	--
PmuVar_Chr6_1299	100.538	94.6718	99.1835	24.2252	24.8537	21.8186	3520	3769	3893	993	851	753	-1.75191	1.16555e-112	6.60007e-111	down	Chr6	10312055	10315794	+	PmuVar_Chr6_1299	--	K04077 chaperonin GroEL | (RefSeq) chaperonin CPN60-2, mitochondrial-like (A)	ko03018: RNA degradation	chaperonin CPN60-2, mitochondrial [Prunus persica]	CH62_CUCMA RecName: Full=Chaperonin CPN60-2, mitochondrial; AltName: Full=HSP60-2; Flags: Precursor;	A0A5E4EKI9_PRUDU SubName: Full=PREDICTED: chaperonin {ECO:0000313|EMBL:VVA15906.1};	Mitochondrial chaperonin, Cpn60/Hsp60p	GO:0005739,mitochondrion; GO:0005524,ATP binding; GO:0140662,NA; GO:0042026,protein refolding; GO:0000166,nucleotide binding; GO:0003674,molecular_function; GO:0005488,binding; GO:0017076,purine nucleotide binding; GO:0030554,adenyl nucleotide binding; GO:0032553,ribonucleotide binding; GO:0032555,purine ribonucleotide binding; GO:0032559,adenyl ribonucleotide binding; GO:0035639,purine ribonucle…	PF00118.27:TCP-1/cpn60 chaperonin family	--	--	--
novel.445	1.2858	0.8025	1.5539	22.9924	21.9267	21.9226	31	22	42	649	517	521	4.50551	4.1579e-112	2.34588e-110	up	Chr2	34449122	34450465	+	--	--	--	--	hypothetical protein DVH24_041253 [Malus domestica]	--	A0A498I9I8_MALDO SubName: Full=Uncharacterized protein {ECO:0000313|EMBL:RXH80106.1};	--	--	--	--	--	--
PmuVar_Chr2_2798	338.305	359.254	355.799	101.824	110.48	97.2276	8786	10609	10359	3096	2806	2489	-1.46599	5.81997e-112	3.27167e-110	down	Chr2	19651918	19654750	-	PmuVar_Chr2_2798	--	K15283 solute carrier family 35, member E1 | (RefSeq) triose phosphate/phosphate translocator, chloroplastic-like isoform X1 (A)	--	PREDICTED: triose phosphate/phosphate translocator, chloroplastic-like isoform X1 [Prunus mume]	TPT_FLATR RecName: Full=Triose phosphate/phosphate translocator, chloroplastic; Short=cTPT; Flags: Precursor;	M5XWQ8_PRUPE RecName: Full=TPT domain-containing protein {ECO:0000259|Pfam:PF03151};	Glucose-6-phosphate/phosphate and phosphoenolpyruvate/phosphate antiporter	GO:0031969,chloroplast membrane; GO:0016021,integral component of membrane; GO:0015605,organophosphate ester transmembrane transporter activity; GO:0015120,phosphoglycerate transmembrane transporter activity; GO:0003674,molecular_function; GO:0005215,transporter activity; GO:0008509,anion transmembrane transporter activity; GO:0015075,ion transmembrane transporter activity; GO:0022857,transmembra…	PF03151.19:Triose-phosphate Transporter family	--	--	--
PmuVar_Chr8_1620	2.3888	1.8037	1.7864	19.4762	16.0126	19.1423	99	85	83	945	649	782	3.50178	9.65508e-112	5.40789e-110	up	Chr8	9593067	9595328	-	PmuVar_Chr8_1620	--	K13415 protein brassinosteroid insensitive 1 [EC:2.7.10.1 2.7.11.1] | (RefSeq) systemin receptor SR160 (A)	ko04075: Plant hormone signal transduction	PREDICTED: leucine-rich repeat receptor-like protein kinase PXC1 [Prunus mume]	PXC1_ARATH RecName: Full=Leucine-rich repeat receptor-like protein kinase PXC1 {ECO:0000305}; AltName: Full=Protein PXY/TDR-CORRELATED 1 {ECO:0000303|PubMed:23815750}; Flags: Precursor;	A0A6J5XV15_PRUAR RecName: Full=Protein kinase domain-containing protein {ECO:0000259|PROSITE:PS50011};	--	GO:0016021,integral component of membrane; GO:0005886,plasma membrane; GO:0005524,ATP binding; GO:0004672,protein kinase activity; GO:0009834,plant-type secondary cell wall biogenesis; GO:0006468,protein phosphorylation; GO:0000166,nucleotide binding; GO:0003674,molecular_function; GO:0005488,binding; GO:0017076,purine nucleotide binding; GO:0030554,adenyl nucleotide binding; GO:0032553,ribonucle…	PF00069.28:Protein kinase domain	--	--	--
PmuVar_Chr5_0386	126.526	133.751	127.472	282.92	336.405	303.985	4975	5980	5619	13024	12936	11782	1.55198	1.25742e-111	7.01748e-110	up	Chr5	4440537	4447343	-	PmuVar_Chr5_0386	--	K22390 acid phosphatase type 7 | (RefSeq) probable inactive purple acid phosphatase 27 (A)	--	PREDICTED: probable inactive purple acid phosphatase 27 [Prunus mume]	PPA27_ARATH RecName: Full=Probable inactive purple acid phosphatase 27; Flags: Precursor;	A0A251QA21_PRUPE RecName: Full=Purple acid phosphatase {ECO:0000256|RuleBase:RU361203}; EC=3.1.3.2 {ECO:0000256|RuleBase:RU361203};	Purple acid phosphatase	GO:0005576,extracellular region; GO:0003993,acid phosphatase activity; GO:0046872,metal ion binding; GO:0003674,molecular_function; GO:0003824,catalytic activity; GO:0016787,hydrolase activity; GO:0016788,hydrolase activity, acting on ester bonds; GO:0016791,phosphatase activity; GO:0042578,phosphoric ester hydrolase activity; GO:0005488,binding; GO:0043167,ion binding; GO:0043169,cation binding;…	PF17808.4:Fn3-like domain from Purple Acid Phosphatase	--	--	--
PmuVar_Chr2_5007	2.3779	2.4688	1.6792	20.4518	21.1403	22.7833	72	85	57	725	626	680	3.60592	1.94248e-111	1.08017e-109	up	Chr2	36632734	36636033	+	PmuVar_Chr2_5007	--	K03444 MFS transporter, SP family, ERD6-like sugar transporter | (RefSeq) sugar transporter ERD6-like 16 (A)	--	PREDICTED: sugar transporter ERD6-like 16 [Prunus mume]	EDL16_ARATH RecName: Full=Sugar transporter ERD6-like 16;	A0A6J5W5E1_PRUAR RecName: Full=MFS domain-containing protein {ECO:0000259|PROSITE:PS50850};	Predicted transporter (major facilitator superfamily)	GO:0016021,integral component of membrane; GO:0016020,membrane; GO:0051119,sugar transmembrane transporter activity; GO:0022857,transmembrane transporter activity; GO:0055085,transmembrane transport; GO:0003674,molecular_function; GO:0005215,transporter activity; GO:0008509,anion transmembrane transporter activity; GO:0015075,ion transmembrane transporter activity; GO:0015144,carbohydrate transme…	PF00083.27:Sugar (and other) transporter	--	--	--
PmuVar_Chr5_3365	34.1029	36.4294	37.1571	94.7144	112.851	117.759	1761	2139	2151	5726	5699	5994	1.89642	2.25768e-111	1.25095e-109	up	Chr5	29178536	29185794	-	PmuVar_Chr5_3365	--	K22530 ATPase family AAA domain-containing protein 1 [EC:3.6.1.-] | (RefSeq) ATPase family AAA domain-containing protein 1-B-like (A)	--	unnamed protein product [Prunus armeniaca]	FIGL1_ARATH RecName: Full=ATPase family AAA domain-containing protein FIGL1 {ECO:0000305}; AltName: Full=AAA-ATPase FIDGETIN-LIKE 1 {ECO:0000303|PubMed:26161528}; EC=3.6.4.- {ECO:0000305};	A0A6J5U5C9_PRUAR RecName: Full=AAA domain-containing protein {ECO:0000259|SMART:SM00382};	AAA+-type ATPase	GO:0005634,nucleus; GO:0005524,ATP binding; GO:0016887,ATPase activity; GO:0006310,DNA recombination; GO:0006281,DNA repair; GO:0045128,negative regulation of reciprocal meiotic recombination; GO:0000166,nucleotide binding; GO:0003674,molecular_function; GO:0005488,binding; GO:0017076,purine nucleotide binding; GO:0030554,adenyl nucleotide binding; GO:0032553,ribonucleotide binding; GO:0032555,pu…	PF00004.32:ATPase family associated with various cellular activities (AAA)	--	--	--
PmuVar_Chr4_1033	115.649	93.9543	98.2879	7.4474	10.1893	7.7762	1207	1115	1150	91	104	80	-3.30347	5.6126e-111	3.09876e-109	down	Chr4	10055497	10056874	+	PmuVar_Chr4_1033	--	K08234 glyoxylase I family protein | (RefSeq) uncharacterized protein LOC103340532 (A)	--	unnamed protein product [Prunus armeniaca]	GLYI4_ARATH RecName: Full=Glyoxylase I 4 {ECO:0000303|PubMed:30483284, ECO:0000303|PubMed:31652571}; Short=AtGLXI-like;4 {ECO:0000303|PubMed:30483284}; Short=AtGLYI4 {ECO:0000303|PubMed:21213008};	A0A6J5WT57_PRUAR RecName: Full=VOC domain-containing protein {ECO:0000259|PROSITE:PS51819};	--	GO:0005737,cytoplasm; GO:0005886,plasma membrane; GO:0016829,lyase activity; GO:0140041,cellular detoxification of methylglyoxal; GO:0006952,defense response; GO:0009787,regulation of abscisic acid-activated signaling pathway; GO:2000022,regulation of jasmonic acid mediated signaling pathway; GO:2000031,regulation of salicylic acid mediated signaling pathway; GO:0009409,response to cold; GO:00094…	PF00903.28:Glyoxalase/Bleomycin resistance protein/Dioxygenase superfamily	--	--	--
PmuVar_Chr4_2945	452.381	432.531	471.885	1017.26	945.255	974.992	8235	8953	9630	21680	16828	17495	1.41739	2.34421e-109	1.28965e-107	up	Chr4	23075383	23076595	+	PmuVar_Chr4_2945	--	K05933 aminocyclopropanecarboxylate oxidase [EC:1.14.17.4] | (RefSeq) 1-aminocyclopropane-1-carboxylate oxidase (A)	ko00270: Cysteine and methionine metabolism; ko01100: Metabolic pathways; ko01110: Biosynthesis of secondary metabolites	1-aminocyclopropane-1-carboxylate oxidase [Prunus persica]	ACCO_PRUMU RecName: Full=1-aminocyclopropane-1-carboxylate oxidase; Short=ACC oxidase; EC=1.14.17.4; AltName: Full=Ethylene-forming enzyme; Short=EFE;	Q43618_PRUPE SubName: Full=1-aminocyclopropane 1-carboxylic acid oxidase {ECO:0000313|EMBL:AAL26910.1}; SubName: Full=1-aminocyclopropane-1-carboxylate oxidase {ECO:0000313|EMBL:CAA54449.1};	Iron/ascorbate family oxidoreductases	GO:0009815,1-aminocyclopropane-1-carboxylate oxidase activity; GO:0031418,L-ascorbic acid binding; GO:0046872,metal ion binding; GO:0009693,ethylene biosynthetic process; GO:0009835,fruit ripening; GO:0003674,molecular_function; GO:0003824,catalytic activity; GO:0016491,oxidoreductase activity; GO:0016638,oxidoreductase activity, acting on the CH-NH2 group of donors; GO:0016641,oxidoreductase act…	PF03171.23:2OG-Fe(II) oxygenase superfamily	--	--	--
PmuVar_Chr1_3203	326.113	289.953	284.497	45.7072	57.0967	39.9287	3364	3401	3290	552	576	406	-2.35924	3.12355e-109	1.7123e-107	down	Chr1	24626182	24627072	-	PmuVar_Chr1_3203	--	--	--	PREDICTED: uncharacterized protein LOC103320342 isoform X1 [Prunus mume]	--	A0A6J5V2A6_PRUAR SubName: Full=Uncharacterized protein {ECO:0000313|EMBL:CAB4282331.1};	--	--	--	--	--	--
PmuVar_Chr8_1369	153.068	147.655	142.2	359.064	338.502	361.594	2870	3148	2989	7882	6207	6683	1.56052	4.02891e-109	2.20081e-107	up	Chr8	7849441	7850367	-	PmuVar_Chr8_1369	--	--	--	unnamed protein product [Prunus armeniaca]	ELO3L_ARATH RecName: Full=Elongation of fatty acids protein 3-like; Short=Protein ELO3-like; EC=2.3.1.-; AltName: Full=Protein HIGH EXPRESSION OF OSMOTICALLY RESPONSIVE GENES 3; AltName: Full=Very long-chain fatty acid condensing enzyme HOS3; Short=VLCFA condensing enzyme HOS3;	A0A6J5Y0I2_PRUAR SubName: Full=Uncharacterized protein {ECO:0000313|EMBL:CAB4317957.1};	Fatty acyl-CoA elongase/Polyunsaturated fatty acid specific elongation enzyme	GO:0030176,integral component of endoplasmic reticulum membrane; GO:0009922,fatty acid elongase activity; GO:0071215,cellular response to abscisic acid stimulus; GO:0030497,fatty acid elongation; GO:0034625,fatty acid elongation, monounsaturated fatty acid; GO:0034626,fatty acid elongation, polyunsaturated fatty acid; GO:0019367,fatty acid elongation, saturated fatty acid; GO:0030148,sphingolipid…	PF01151.21:GNS1/SUR4 family	--	--	--
PmuVar_Chr5_2947	154.935	151.609	161.802	474.711	415.3	489.579	1429	1590	1673	5126	3746	4451	1.8627	1.65835e-108	9.02691e-107	up	Chr5	26826716	26827259	+	PmuVar_Chr5_2947	--	--	--	PREDICTED: protein EARLY RESPONSIVE TO DEHYDRATION 15-like isoform X3 [Prunus mume]	ERD15_SOYBN RecName: Full=Protein EARLY RESPONSIVE TO DEHYDRATION 15 {ECO:0000303|PubMed:21482825}; Short=GmERD15 {ECO:0000303|PubMed:21482825};	A0A6J5U7B1_PRUAR RecName: Full=PAM2 domain-containing protein {ECO:0000259|Pfam:PF07145};	--	GO:0005634,nucleus; GO:0003677,DNA binding; GO:0045893,positive regulation of transcription, DNA-templated; GO:0003674,molecular_function; GO:0003676,nucleic acid binding; GO:0005488,binding; GO:0097159,organic cyclic compound binding; GO:1901363,heterocyclic compound binding; GO:0006139,nucleobase-containing compound metabolic process; GO:0006351,transcription, DNA-templated; GO:0006355,regulati…	PF07145.18:Ataxin-2 C-terminal region	--	--	--
PmuVar_Chr2_4475	912.102	956.176	909.133	1740.84	1897.78	1818.96	35089	41827	39209	78407	71400	68977	1.27572	2.93074e-108	1.5897e-106	up	Chr2	32582858	32589903	-	PmuVar_Chr2_4475	--	K08248 (R)-mandelonitrile lyase [EC:4.1.2.10] | (RefSeq) (R)-mandelonitrile lyase 4 (A)	ko00460: Cyanoamino acid metabolism; ko01100: Metabolic pathways; ko01110: Biosynthesis of secondary metabolites	PREDICTED: (R)-mandelonitrile lyase 4 [Prunus mume]	MDL4_PRUSE RecName: Full=(R)-mandelonitrile lyase 4; EC=4.1.2.10; AltName: Full=Hydroxynitrile lyase 4; Short=(R)-oxynitrilase 4; Flags: Precursor;	A0A251QUN1_PRUPE RecName: Full=(R)-mandelonitrile lyase {ECO:0000256|ARBA:ARBA00013074}; EC=4.1.2.10 {ECO:0000256|ARBA:ARBA00013074};	Glucose dehydrogenase/choline dehydrogenase/mandelonitrile lyase (GMC oxidoreductase family)	GO:0033095,aleurone grain; GO:0005773,vacuole; GO:0050660,flavin adenine dinucleotide binding; GO:0046593,mandelonitrile lyase activity; GO:0016614,oxidoreductase activity, acting on CH-OH group of donors; GO:0000166,nucleotide binding; GO:0003674,molecular_function; GO:0005488,binding; GO:0036094,small molecule binding; GO:0043167,ion binding; GO:0043168,anion binding; GO:0097159,organic cyclic …	PF00732.22:GMC oxidoreductase	--	--	--
PmuVar_Chr7_0325	3.7378	4.856	4.4708	54.8547	45.082	56.4479	44	65	59	756	519	655	3.8813	3.25118e-108	1.75734e-106	up	Chr7	2796923	2797504	-	PmuVar_Chr7_0325	--	--	--	PREDICTED: disease resistance response protein 206-like [Prunus mume]	DIR_SINHE RecName: Full=Dirigent protein {ECO:0000303|Ref.1}; Short=PhDPO {ECO:0000303|PubMed:23653238}; Flags: Precursor;	A0A6J5X951_PRUAR RecName: Full=Dirigent protein {ECO:0000256|RuleBase:RU363099};	--	GO:0048046,apoplast; GO:0102910,dirigent protein activity; GO:0019438,aromatic compound biosynthetic process; GO:0009699,phenylpropanoid biosynthetic process; GO:0009753,response to jasmonic acid; GO:0009411,response to UV; GO:0009611,response to wounding; GO:0003674,molecular_function; GO:0003824,catalytic activity; GO:0016491,oxidoreductase activity; GO:0016679,oxidoreductase activity, acting o…	PF03018.17:Dirigent-like protein	--	--	--
PmuVar_Chr2_4733	26.7792	28.0127	27.2496	58.1446	57.5873	57.234	2998	3566	3420	7621	6305	6316	1.37802	5.71495e-108	3.0783e-106	up	Chr2	34769928	34780458	-	PmuVar_Chr2_4733	--	K12121 phytochrome B | (RefSeq) phytochrome B (A)	ko04712: Circadian rhythm - plant	unnamed protein product [Prunus armeniaca]	PHYB_TOBAC RecName: Full=Phytochrome B;	A0A6J5TF52_PRUAR RecName: Full=ATP citrate synthase {ECO:0000256|ARBA:ARBA00012639}; EC=2.3.3.8 {ECO:0000256|ARBA:ARBA00012639};	--	GO:0005783,endoplasmic reticulum; GO:0005634,nucleus; GO:0051740,ethylene binding; GO:0000155,phosphorelay sensor kinase activity; GO:0009881,photoreceptor activity; GO:0042803,protein homodimerization activity; GO:0009584,detection of visible light; GO:0010105,negative regulation of ethylene-activated signaling pathway; GO:0017006,protein-tetrapyrrole linkage; GO:0009585,red, far-red light photo…	PF00360.23:Phytochrome region	--	--	--
PmuVar_Chr8_0307	10.1463	11.5894	12.5315	43.0756	41.5608	43.4266	338	439	468	1680	1354	1426	2.20335	1.89115e-107	1.01512e-105	up	Chr8	1815961	1819430	-	PmuVar_Chr8_0307	--	--	--	PREDICTED: transmembrane protein DDB_G0292058 [Prunus mume]	--	A0A6J5VM61_PRUAR SubName: Full=Uncharacterized protein {ECO:0000313|EMBL:CAB4288787.1};	--	GO:0016021,integral component of membrane; GO:0005575,cellular_component; GO:0016020,membrane; GO:0031224,intrinsic component of membrane; GO:0110165,cellular anatomical entity	--	--	--	--
PmuVar_Chr8_0593	98.881	89.9183	101.603	321.557	281.775	323.005	882	912	1016	3358	2458	2840	1.9779	2.09494e-107	1.12061e-105	up	Chr8	3280952	3281392	-	PmuVar_Chr8_0593	--	K03627 putative transcription factor | (RefSeq) multiprotein-bridging factor 1c (A)	--	PREDICTED: multiprotein-bridging factor 1c [Prunus mume]	MBF1C_ARATH RecName: Full=Multiprotein-bridging factor 1c;	A0A6J5Y5T7_PRUAR RecName: Full=HTH cro/C1-type domain-containing protein {ECO:0000259|PROSITE:PS50943};	Transcription factor MBF1	GO:0005737,cytoplasm; GO:0005730,nucleolus; GO:0005634,nucleus; GO:0003677,DNA binding; GO:0003700,DNA-binding transcription factor activity; GO:0003713,transcription coactivator activity; GO:0071456,cellular response to hypoxia; GO:0009873,ethylene-activated signaling pathway; GO:0045893,positive regulation of transcription, DNA-templated; GO:0009737,response to abscisic acid; GO:0009408,respons…	PF08523.13:Multiprotein bridging factor 1	MBF1	TR	MBF1
PmuVar_Chr1_0760	18.075	19.3245	18.0199	106.86	91.0523	122.785	204	248	228	1412	1005	1366	2.83687	1.88998e-106	1.00749e-104	up	Chr1	7946542	7947193	+	PmuVar_Chr1_0760	--	--	--	unnamed protein product [Prunus armeniaca]	PLAT1_ARATH RecName: Full=PLAT domain-containing protein 1 {ECO:0000305}; Short=AtPLAT1 {ECO:0000303|PubMed:25396746}; Short=PLAT domain protein 1 {ECO:0000303|PubMed:25396746}; Flags: Precursor;	A0A6J5XQD4_PRUAR RecName: Full=PLAT domain-containing protein {ECO:0000259|PROSITE:PS50095};	--	GO:0009535,chloroplast thylakoid membrane; GO:0005783,endoplasmic reticulum; GO:0000325,plant-type vacuole; GO:0005886,plasma membrane; GO:0010287,plastoglobule; GO:0099503,secretory vesicle; GO:0009579,thylakoid; GO:0040008,regulation of growth; GO:0009409,response to cold; GO:0009651,response to salt stress; GO:0009414,response to water deprivation; GO:0008150,biological_process; GO:0040007,gro…	PF01477.26:PLAT/LH2 domain	--	--	--
PmuVar_Chr3_0246	6.5702	4.7188	6.0072	38.1608	44.9559	38.2147	120	98	123	816	803	688	3.11494	4.18618e-105	2.22385e-103	up	Chr3	1364431	1365954	+	PmuVar_Chr3_0246	--	K08235 xyloglucan:xyloglucosyl transferase [EC:2.4.1.207] | (RefSeq) probable xyloglucan endotransglucosylase/hydrolase protein 8 isoform X2 (A)	--	PREDICTED: probable xyloglucan endotransglucosylase/hydrolase protein 8 isoform X2 [Prunus mume]	XTH8_ARATH RecName: Full=Probable xyloglucan endotransglucosylase/hydrolase protein 8; Short=At-XTH8; Short=XTH-8; EC=2.4.1.207; Flags: Precursor;	A0A6P5T417_PRUAV RecName: Full=Xyloglucan endotransglucosylase/hydrolase {ECO:0000256|RuleBase:RU361120}; EC=2.4.1.207 {ECO:0000256|RuleBase:RU361120};	--	GO:0048046,apoplast; GO:0004553,hydrolase activity, hydrolyzing O-glycosyl compounds; GO:0030247,polysaccharide binding; GO:0016762,xyloglucan:xyloglucosyl transferase activity; GO:0042546,cell wall biogenesis; GO:0071555,cell wall organization; GO:0010411,xyloglucan metabolic process; GO:0003674,molecular_function; GO:0003824,catalytic activity; GO:0016787,hydrolase activity; GO:0016798,hydrolas…	PF00722.24:Glycosyl hydrolases family 16	--	--	--
PmuVar_Chr2_3226	1.6606	1.9267	1.7053	11.5615	12.6279	9.6973	119	157	137	970	885	685	2.9772	1.42518e-104	7.54516e-103	up	Chr2	22538857	22542482	+	PmuVar_Chr2_3226	--	--	--	PREDICTED: FRIGIDA-like protein 5 [Prunus mume]	FRL1A_ARATH RecName: Full=FRIGIDA-like protein 1; Short=AtFRIL1; AltName: Full=Protein SUPPRESSOR OF FRI 8;	A0A6J5W5I3_PRUAR SubName: Full=Uncharacterized protein {ECO:0000313|EMBL:CAB4294894.1};	--	GO:0030154,cell differentiation; GO:0009908,flower development; GO:0008150,biological_process; GO:0009987,cellular process; GO:0032502,developmental process; GO:0048869,cellular developmental process; GO:0000003,reproduction; GO:0003006,developmental process involved in reproduction; GO:0007275,multicellular organism development; GO:0009791,post-embryonic development; GO:0022414,reproductive proc…	PF07899.14:Frigida-like protein	--	--	--
PmuVar_Chr4_3097	81.1153	77.1474	81.5978	20.8402	20.532	18.7795	3155	3412	3558	949	781	720	-1.69274	3.44978e-104	1.82014e-102	down	Chr4	24091670	24095206	+	PmuVar_Chr4_3097	--	K16911 ATP-dependent RNA helicase DDX21 [EC:3.6.4.13] | (RefSeq) DEAD-box ATP-dependent RNA helicase 3, chloroplastic (A)	--	PREDICTED: DEAD-box ATP-dependent RNA helicase 53-like [Prunus mume]	RH53_ARATH RecName: Full=DEAD-box ATP-dependent RNA helicase 53, mitochondrial; EC=3.6.4.13; Flags: Precursor;	A0A314UJN0_PRUYE SubName: Full=DEAD-box ATP-dependent RNA helicase 53-like {ECO:0000313|EMBL:PQM37697.1};	ATP-dependent RNA helicase	GO:0005737,cytoplasm; GO:0005829,cytosol; GO:0005739,mitochondrion; GO:0005730,nucleolus; GO:0005634,nucleus; GO:0009505,plant-type cell wall; GO:0032991,protein-containing complex; GO:0005524,ATP binding; GO:0016887,ATPase activity; GO:0003729,mRNA binding; GO:0003724,RNA helicase activity; GO:0000373,Group II intron splicing; GO:0009409,response to cold; GO:0006364,rRNA processing; GO:0000166,n…	PF00270.32:DEAD/DEAH box helicase	--	--	--
PmuVar_Chr7_0984	3.1291	2.8895	2.8145	18.6202	17.3581	17.7771	120	126	121	836	651	672	2.91014	6.29375e-104	3.30936e-102	up	Chr7	7224741	7227093	-	PmuVar_Chr7_0984	--	K13415 protein brassinosteroid insensitive 1 [EC:2.7.10.1 2.7.11.1] | (RefSeq) systemin receptor SR160 (A)	ko04075: Plant hormone signal transduction	PREDICTED: probable inactive receptor kinase At2g26730 [Prunus mume]	Y2267_ARATH RecName: Full=Probable inactive receptor kinase At2g26730; Flags: Precursor;	M5WCN5_PRUPE RecName: Full=Protein kinase domain-containing protein {ECO:0000259|PROSITE:PS50011};	--	GO:0016021,integral component of membrane; GO:0005777,peroxisome; GO:0005886,plasma membrane; GO:0005524,ATP binding; GO:0004672,protein kinase activity; GO:0006468,protein phosphorylation; GO:0000166,nucleotide binding; GO:0003674,molecular_function; GO:0005488,binding; GO:0017076,purine nucleotide binding; GO:0030554,adenyl nucleotide binding; GO:0032553,ribonucleotide binding; GO:0032555,purin…	PF00069.28:Protein kinase domain	--	--	--
PmuVar_Chr6_0401	51.1036	50.6106	52.6232	14.2621	15.518	13.076	5408	6090	6243	1767	1606	1364	-1.54762	1.05647e-103	5.53623e-102	down	Chr6	3932010	3955802	-	PmuVar_Chr6_0401	--	K18789 xylogalacturonan beta-1,3-xylosyltransferase [EC:2.4.2.41] | (RefSeq) probable glycosyltransferase At3g42180 (A)	--	hypothetical protein GBA52_026294 [Prunus armeniaca]	GLYT3_ARATH RecName: Full=Probable glycosyltransferase At5g03795; EC=2.4.-.-;	A0A6J5Y4L3_PRUAR RecName: Full=SUN domain-containing protein {ECO:0000259|PROSITE:PS51469};	Acetylglucosaminyltransferase EXT1/exostosin 1	GO:0000139,Golgi membrane; GO:0016021,integral component of membrane; GO:0016757,transferase activity, transferring glycosyl groups; GO:0071555,cell wall organization; GO:0006486,protein glycosylation; GO:0003674,molecular_function; GO:0003824,catalytic activity; GO:0016740,transferase activity; GO:0008150,biological_process; GO:0009987,cellular process; GO:0016043,cellular component organization…	PF03016.18:Exostosin family	--	--	--
PmuVar_Chr2_1427	80.4315	83.451	82.7016	230.181	213.028	254.149	1552	1831	1789	5200	4020	4834	1.8033	1.25738e-103	6.56682e-102	up	Chr2	11135122	11136256	+	PmuVar_Chr2_1427	--	--	--	PREDICTED: uncharacterized protein LOC103320347 [Prunus mume]	--	M5XFA9_PRUPE SubName: Full=Uncharacterized protein {ECO:0000313|EMBL:EMJ24146.1};	--	GO:0016021,integral component of membrane; GO:0005575,cellular_component; GO:0016020,membrane; GO:0031224,intrinsic component of membrane; GO:0110165,cellular anatomical entity	PF03168.16:Late embryogenesis abundant protein	--	--	--
PmuVar_Chr2_4425	558.542	556.76	558.725	1186.01	1148.87	1282.39	18471	20936	20714	45919	37156	41803	1.41455	2.15158e-103	1.11991e-101	up	Chr2	32060793	32065473	+	PmuVar_Chr2_4425	--	K01904 4-coumarate--CoA ligase [EC:6.2.1.12] | (RefSeq) 4-coumarate--CoA ligase 2-like (A)	ko00130: Ubiquinone and other terpenoid-quinone biosynthesis; ko00940: Phenylpropanoid biosynthesis; ko01100: Metabolic pathways; ko01110: Biosynthesis of secondary metabolites	4-coumarate--CoA ligase 2 [Prunus persica]	CCL1_HUMLU RecName: Full=4-coumarate--CoA ligase CCL1 {ECO:0000303|PubMed:23300257}; Short=HlCCL1 {ECO:0000303|PubMed:23300257}; EC=6.2.1.12 {ECO:0000269|PubMed:23300257};	M5XDA9_PRUPE SubName: Full=Uncharacterized protein {ECO:0000313|EMBL:EMJ23441.1};	Acyl-CoA synthetase	GO:0005737,cytoplasm; GO:0005829,cytosol; GO:0016207,4-coumarate-CoA ligase activity; GO:0005524,ATP binding; GO:0016405,CoA-ligase activity; GO:0003674,molecular_function; GO:0003824,catalytic activity; GO:0016874,ligase activity; GO:0016877,ligase activity, forming carbon-sulfur bonds; GO:0016878,acid-thiol ligase activity; GO:0000166,nucleotide binding; GO:0005488,binding; GO:0017076,purine nu…	PF00501.31:AMP-binding enzyme	--	--	--
PmuVar_Chr2_0557	120.869	130.517	133.968	270.417	298.005	276.258	2787	3422	3463	7300	6720	6279	1.43326	2.92782e-103	1.51883e-101	up	Chr2	5011932	5013484	+	PmuVar_Chr2_0557	--	--	--	PREDICTED: transcription factor bHLH145 [Prunus mume]	BH145_ARATH RecName: Full=Transcription factor bHLH145; AltName: Full=Basic helix-loop-helix protein 145; Short=AtbHLH145; Short=bHLH 145; AltName: Full=Transcription factor EN 131; AltName: Full=bHLH transcription factor bHLH145;	A0A314Y8T0_PRUYE SubName: Full=Transcription factor bHLH145 {ECO:0000313|EMBL:PQQ01101.1};	--	GO:0005634,nucleus; GO:0003677,DNA binding; GO:0003700,DNA-binding transcription factor activity; GO:0046983,protein dimerization activity; GO:0006355,regulation of transcription, DNA-templated; GO:0003674,molecular_function; GO:0003676,nucleic acid binding; GO:0005488,binding; GO:0097159,organic cyclic compound binding; GO:1901363,heterocyclic compound binding; GO:0140110,transcription regulator…	--	--	--	--
PmuVar_Chr8_0390	69.0534	72.661	75.6473	12.5878	14.9114	16.2489	3130	3745	3844	668	661	726	-2.01281	8.51045e-103	4.4001e-101	down	Chr8	2273296	2275682	+	PmuVar_Chr8_0390	--	K06617 raffinose synthase [EC:2.4.1.82] | (RefSeq) probable galactinol--sucrose galactosyltransferase 6 isoform X1 (A)	ko00052: Galactose metabolism; ko01100: Metabolic pathways	PREDICTED: probable galactinol--sucrose galactosyltransferase 6 isoform X2 [Prunus mume]	RFS6_ARATH RecName: Full=Probable galactinol--sucrose galactosyltransferase 6; EC=2.4.1.82; AltName: Full=Protein DARK INDUCIBLE 10; AltName: Full=Raffinose synthase 6;	A0A6J5VLC6_PRUAR RecName: Full=Galactinol--sucrose galactosyltransferase {ECO:0000256|ARBA:ARBA00012708}; EC=2.4.1.82 {ECO:0000256|ARBA:ARBA00012708};	--	GO:0047274,galactinol-sucrose galactosyltransferase activity; GO:0005975,carbohydrate metabolic process; GO:0003674,molecular_function; GO:0003824,catalytic activity; GO:0008378,galactosyltransferase activity; GO:0016740,transferase activity; GO:0016757,transferase activity, transferring glycosyl groups; GO:0016758,transferase activity, transferring hexosyl groups; GO:0008150,biological_process; …	PF05691.15:Raffinose synthase or seed imbibition protein Sip1	--	--	--
PmuVar_Chr2_0787	73.7862	72.6866	66.7089	265.534	225.835	238.625	591	662	599	2490	1769	1884	2.07952	2.42538e-102	1.2498e-100	up	Chr2	6746372	6748246	+	PmuVar_Chr2_0787	--	K05759 profilin | (RefSeq) profilin-like (A)	--	PREDICTED: profilin-like [Prunus mume]	PROF_PYRCO RecName: Full=Profilin; AltName: Full=Allergen Pyr c 3; AltName: Allergen=Pyr c 4;	A0A6J5WBT6_PRUAR RecName: Full=Profilin {ECO:0000256|RuleBase:RU003909};	Profilin	GO:0005737,cytoplasm; GO:0005856,cytoskeleton; GO:0003779,actin binding; GO:0003674,molecular_function; GO:0005488,binding; GO:0005515,protein binding; GO:0008092,cytoskeletal protein binding; GO:0005575,cellular_component; GO:0005622,intracellular anatomical structure; GO:0110165,cellular anatomical entity; GO:0043226,organelle; GO:0043228,non-membrane-bounded organelle; GO:0043229,intracellular…	PF00235.22:Profilin	--	--	--
PmuVar_Chr5_0032	40.4708	42.7065	43.8334	8.8161	9.5448	8.1635	1886	2263	2290	481	435	375	-1.95844	2.73317e-102	1.40373e-100	down	Chr5	628880	656278	-	PmuVar_Chr5_0032	--	--	--	hypothetical protein PRUPE_2G055600, partial [Prunus persica]	TMVRN_NICGU RecName: Full=TMV resistance protein N; EC=3.2.2.6 {ECO:0000255|PROSITE-ProRule:PRU00204};	A0A251QBR3_PRUPE RecName: Full=TIR domain-containing protein {ECO:0000259|PROSITE:PS50104}; Flags: Fragment;	--	GO:0005737,cytoplasm; GO:0043531,ADP binding; GO:0005524,ATP binding; GO:0050135,NAD(P)+ nucleosidase activity; GO:0061809,NAD+ nucleotidase, cyclic ADP-ribose generating; GO:0050832,defense response to fungus; GO:0009626,plant-type hypersensitive response; GO:0007165,signal transduction; GO:0000166,nucleotide binding; GO:0003674,molecular_function; GO:0005488,binding; GO:0017076,purine nucleotid…	PF12799.10:Leucine Rich repeats (2 copies)	--	--	--
PmuVar_Chr8_2608	0.4607	0.4675	0.3478	18.4962	17.5763	18.0133	13	15	11	611	485	501	5.71166	4.01758e-102	2.05655e-100	up	Chr8	18880462	18883190	-	PmuVar_Chr8_2608	--	K07375 tubulin beta | (RefSeq) tubulin beta-4 chain (A)	ko04145: Phagosome	tubulin beta-5 chain [Prunus avium]	TBB4_ELEIN RecName: Full=Tubulin beta-4 chain; AltName: Full=Beta-4-tubulin;	A0A5E4G758_PRUDU RecName: Full=Tubulin beta chain {ECO:0000256|RuleBase:RU000352};	Beta tubulin	GO:0005737,cytoplasm; GO:0005874,microtubule; GO:0005525,GTP binding; GO:0005200,structural constituent of cytoskeleton; GO:0007017,microtubule-based process; GO:0000166,nucleotide binding; GO:0001882,nucleoside binding; GO:0001883,purine nucleoside binding; GO:0003674,molecular_function; GO:0005488,binding; GO:0017076,purine nucleotide binding; GO:0019001,guanyl nucleotide binding; GO:0032549,ri…	PF00091.28:Tubulin/FtsZ family, GTPase domain	--	--	--
PmuVar_Chr2_0115	15.6562	16.4723	14.6015	1.5159	1.4745	1.8487	988	1182	1033	112	91	115	-2.97142	5.37314e-102	2.74136e-100	down	Chr2	1076288	1083804	-	PmuVar_Chr2_0115	--	K01873 valyl-tRNA synthetase [EC:6.1.1.9] | (RefSeq) valine--tRNA ligase, mitochondrial 1-like (A)	ko00970: Aminoacyl-tRNA biosynthesis	hypothetical protein GBA52_000116 [Prunus armeniaca]	SYVM1_ARATH RecName: Full=Valine--tRNA ligase, mitochondrial 1 {ECO:0000305}; EC=6.1.1.9 {ECO:0000305}; AltName: Full=AtSYV1 {ECO:0000303|PubMed:10583378}; AltName: Full=Protein TWIN 2 {ECO:0000305}; AltName: Full=Valyl-tRNA synthetase {ECO:0000305}; Short=ValRS {ECO:0000305}; Flags: Precursor;	A0A6J5WG16_PRUAR RecName: Full=Valine--tRNA ligase {ECO:0000256|ARBA:ARBA00013169}; EC=6.1.1.9 {ECO:0000256|ARBA:ARBA00013169}; AltName: Full=Valyl-tRNA synthetase {ECO:0000256|ARBA:ARBA00029936};	Valyl-tRNA synthetase	GO:0009507,chloroplast; GO:0005829,cytosol; GO:0005576,extracellular region; GO:0005739,mitochondrion; GO:0002161,aminoacyl-tRNA editing activity; GO:0005524,ATP binding; GO:0004832,valine-tRNA ligase activity; GO:0009793,embryo development ending in seed dormancy; GO:0006438,valyl-tRNA aminoacylation; GO:0003674,molecular_function; GO:0003824,catalytic activity; GO:0016787,hydrolase activity; GO…	PF00133.25:tRNA synthetases class I (I, L, M and V)	--	--	--
PmuVar_Chr2_4476	88.592	82.3713	86.4145	182.012	180.784	176.282	3005	3177	3286	7228	5997	5894	1.3689	5.92707e-102	3.01403e-100	up	Chr2	32596345	32598477	+	PmuVar_Chr2_4476	--	K08248 (R)-mandelonitrile lyase [EC:4.1.2.10] | (RefSeq) (R)-mandelonitrile lyase 1 (A)	ko00460: Cyanoamino acid metabolism; ko01100: Metabolic pathways; ko01110: Biosynthesis of secondary metabolites	PREDICTED: (R)-mandelonitrile lyase 1 [Prunus mume]	MDL1_PRUDU RecName: Full=(R)-mandelonitrile lyase 1; EC=4.1.2.10; AltName: Full=Hydroxynitrile lyase 1; Short=(R)-oxynitrilase 1; Flags: Precursor;	A0A5E4GBK6_PRUDU RecName: Full=(R)-mandelonitrile lyase {ECO:0000256|ARBA:ARBA00013074}; EC=4.1.2.10 {ECO:0000256|ARBA:ARBA00013074};	Glucose dehydrogenase/choline dehydrogenase/mandelonitrile lyase (GMC oxidoreductase family)	GO:0050660,flavin adenine dinucleotide binding; GO:0046593,mandelonitrile lyase activity; GO:0016614,oxidoreductase activity, acting on CH-OH group of donors; GO:0000166,nucleotide binding; GO:0003674,molecular_function; GO:0005488,binding; GO:0036094,small molecule binding; GO:0043167,ion binding; GO:0043168,anion binding; GO:0097159,organic cyclic compound binding; GO:1901265,nucleoside phospha…	PF00732.22:GMC oxidoreductase	--	--	--
PmuVar_Chr6_2567	7.4347	6.7018	7.4608	51.4903	49.224	40.226	120	123	135	973	777	640	3.00948	6.20178e-102	3.14339e-100	up	Chr6	19321211	19324796	+	PmuVar_Chr6_2567	--	K14488 SAUR family protein | (RefSeq) indole-3-acetic acid-induced protein ARG7-like (A)	ko04075: Plant hormone signal transduction	Hypothetical predicted protein, partial [Prunus dulcis]	RNHX1_ARATH RecName: Full=Putative ribonuclease H protein At1g65750; EC=3.1.26.4;	A0A5E4FKG7_PRUDU RecName: Full=zf-RVT domain-containing protein {ECO:0000259|Pfam:PF13966}; Flags: Fragment;	FOG: Reverse transcriptase	GO:0046872,metal ion binding; GO:0003676,nucleic acid binding; GO:0004523,RNA-DNA hybrid ribonuclease activity; GO:0003674,molecular_function; GO:0005488,binding; GO:0043167,ion binding; GO:0043169,cation binding; GO:0097159,organic cyclic compound binding; GO:1901363,heterocyclic compound binding; GO:0003824,catalytic activity; GO:0004518,nuclease activity; GO:0004519,endonuclease activity; GO:0…	PF13966.9:zinc-binding in reverse transcriptase	--	--	--
PmuVar_Chr4_2009	29.5876	25.7848	31.0077	82.7893	88.0587	80.9896	772	765	907	2529	2247	2083	1.84601	6.26843e-102	3.16679e-100	up	Chr4	17234489	17237249	-	PmuVar_Chr4_2009	--	--	--	PREDICTED: kelch repeat-containing protein At3g27220-like [Prunus mume]	Y3272_ARATH RecName: Full=Kelch repeat-containing protein At3g27220;	A0A6J5X0I5_PRUAR SubName: Full=Uncharacterized protein {ECO:0000313|EMBL:CAB4305777.1};	FOG: Kelch repeat	GO:0005768,endosome; GO:0005794,Golgi apparatus; GO:0005797,Golgi medial cisterna; GO:0016021,integral component of membrane; GO:0005802,trans-Golgi network; GO:0009061,anaerobic respiration; GO:0071456,cellular response to hypoxia; GO:0006091,generation of precursor metabolites and energy; GO:0008150,biological_process; GO:0008152,metabolic process; GO:0009987,cellular process; GO:0015980,energy…	PF13418.9:Galactose oxidase, central domain	--	--	--
PmuVar_Chr2_2340	25.0082	21.9692	24.3622	68.4618	85.6032	71.4658	912	911	996	2923	3053	2569	1.96082	6.36681e-102	3.20601e-100	up	Chr2	16567283	16572094	-	PmuVar_Chr2_2340	--	K16732 Ase1/PRC1/MAP65 family protein | (RefSeq) 65-kDa microtubule-associated protein 6-like (A)	--	PREDICTED: 65-kDa microtubule-associated protein 6-like [Prunus mume]	MA656_ARATH RecName: Full=65-kDa microtubule-associated protein 6; Short=AtMAP65-6;	A0A6J5W2R5_PRUAR SubName: Full=Uncharacterized protein {ECO:0000313|EMBL:CAB4295880.1};	Microtubule-associated protein essential for anaphase spindle elongation	GO:0005737,cytoplasm; GO:0005874,microtubule; GO:0005739,mitochondrion; GO:0005634,nucleus; GO:0009524,phragmoplast; GO:0009536,plastid; GO:0009574,preprophase band; GO:0005819,spindle; GO:0008017,microtubule binding; GO:0007049,cell cycle; GO:0051301,cell division; GO:0000226,microtubule cytoskeleton organization; GO:0003674,molecular_function; GO:0005488,binding; GO:0005515,protein binding; GO:…	PF03999.15:Microtubule associated protein (MAP65/ASE1 family)	--	--	--
PmuVar_Chr2_5717	288.212	292.893	326.699	89.9128	86.2344	78.3258	12819	14813	16290	4682	3751	3434	-1.53231	7.33405e-102	3.68107e-100	down	Chr2	44248450	44255374	-	PmuVar_Chr2_5717	--	K03363 cell division cycle 20, cofactor of APC complex | (RefSeq) cell division cycle 20.2, cofactor of APC complex-like (A)	ko04120: Ubiquitin mediated proteolysis	PREDICTED: cell division cycle 20.2, cofactor of APC complex-like [Prunus mume]	CDC22_ARATH RecName: Full=Cell division cycle 20.2, cofactor of APC complex; Short=AtCDC20.2;	M5XVV9_PRUPE SubName: Full=Uncharacterized protein {ECO:0000313|EMBL:EMJ23300.1};	Anaphase promoting complex, Cdc20, Cdh1, and Ama1 subunits	GO:0005680,anaphase-promoting complex; GO:0033597,mitotic checkpoint complex; GO:0005634,nucleus; GO:0010997,anaphase-promoting complex binding; GO:0019900,kinase binding; GO:1990757,ubiquitin ligase activator activity; GO:0031145,anaphase-promoting complex-dependent catabolic process; GO:0007049,cell cycle; GO:0051301,cell division; GO:1905786,positive regulation of anaphase-promoting complex-de…	PF00400.35:WD domain, G-beta repeat	--	--	--
PmuVar_Chr7_2458	40.3868	36.7655	36.2487	0.4276	0.2986	0.3809	968	1002	974	12	7	9	-6.36269	8.70004e-102	4.35255e-100	down	Chr7	18347391	18348575	+	PmuVar_Chr7_2458	--	K22683 aspartyl protease family protein [EC:3.4.23.-] | (RefSeq) LOW QUALITY PROTEIN: aspartyl protease family protein 2-like (A)	--	PREDICTED: aspartic proteinase nepenthesin-1 [Prunus mume]	ASP63_ARATH RecName: Full=Probable aspartyl protease At4g16563 {ECO:0000305}; EC=3.4.23.- {ECO:0000305}; Flags: Precursor;	A0A5E4GJJ1_PRUDU SubName: Full=PREDICTED: aspartic {ECO:0000313|EMBL:VVA39890.1};	Aspartyl protease	GO:0009505,plant-type cell wall; GO:0004190,aspartic-type endopeptidase activity; GO:0006508,proteolysis; GO:0003674,molecular_function; GO:0003824,catalytic activity; GO:0004175,endopeptidase activity; GO:0008233,peptidase activity; GO:0016787,hydrolase activity; GO:0070001,aspartic-type peptidase activity; GO:0140096,catalytic activity, acting on a protein; GO:0006807,nitrogen compound metaboli…	PF14541.9:Xylanase inhibitor C-terminal	--	--	--
PmuVar_Chr3_2842	69.0773	67.744	69.7357	14.0765	13.1207	11.853	1685	1879	1907	402	313	285	-2.09858	1.32873e-101	6.62605e-100	down	Chr3	22365973	22368634	+	PmuVar_Chr3_2842	--	K00830 alanine-glyoxylate transaminase / serine-glyoxylate transaminase / serine-pyruvate transaminase [EC:2.6.1.44 2.6.1.45 2.6.1.51] | (RefSeq) serine--glyoxylate aminotransferase (A)	ko00250: Alanine, aspartate and glutamate metabolism; ko00260: Glycine, serine and threonine metabolism; ko00630: Glyoxylate and dicarboxylate metabolism; ko01100: Metabolic pathways; ko01110: Biosynthesis of secondary metabolites; ko01200: Carbon metabolism; ko04146: Peroxisome	PREDICTED: serine--glyoxylate aminotransferase [Prunus mume]	SGAT_ARATH RecName: Full=Serine--glyoxylate aminotransferase {ECO:0000305|PubMed:18235971, ECO:0000305|PubMed:23098902}; EC=2.6.1.45 {ECO:0000269|PubMed:18235971, ECO:0000269|PubMed:23098902}; AltName: Full=Alanine--glyoxylate aminotransferase {ECO:0000305|PubMed:18235971, ECO:0000305|PubMed:23098902}; Short=AGT {ECO:0000305|PubMed:18235971, ECO:0000305|PubMed:23098902}; EC=2.6.1.44 {ECO:0000269|…	M5WVV0_PRUPE RecName: Full=Alanine--glyoxylate transaminase {ECO:0000256|ARBA:ARBA00013049}; EC=2.6.1.44 {ECO:0000256|ARBA:ARBA00013049};	Alanine-glyoxylate aminotransferase AGT1	GO:0048046,apoplast; GO:0009507,chloroplast; GO:0009570,chloroplast stroma; GO:0005829,cytosol; GO:0005739,mitochondrion; GO:0005777,peroxisome; GO:0005886,plasma membrane; GO:0008453,alanine-glyoxylate transaminase activity; GO:0003729,mRNA binding; GO:0050281,serine-glyoxylate transaminase activity; GO:0004760,serine-pyruvate transaminase activity; GO:0019265,glycine biosynthetic process, by tr…	PF00266.22:Aminotransferase class-V	--	--	--
PmuVar_Chr3_3178	33.3874	40.2367	34.8378	94.5396	97.3574	100.333	1720	2357	2012	5702	4905	5095	1.73119	2.62749e-101	1.30605e-99	up	Chr3	26465531	26479789	+	PmuVar_Chr3_3178	--	K12309 beta-galactosidase [EC:3.2.1.23] | (RefSeq) beta-galactosidase 17 isoform X1 (A)	ko00052: Galactose metabolism; ko00511: Other glycan degradation; ko00531: Glycosaminoglycan degradation; ko00600: Sphingolipid metabolism; ko00604: Glycosphingolipid biosynthesis - ganglio series; ko01100: Metabolic pathways	PREDICTED: beta-galactosidase 10 [Prunus mume]	BGA10_ARATH RecName: Full=Beta-galactosidase 10; Short=Lactase 10; EC=3.2.1.23; Flags: Precursor;	A0A5E4FTW7_PRUDU RecName: Full=Beta-galactosidase {ECO:0000256|ARBA:ARBA00012756, ECO:0000256|RuleBase:RU000675}; EC=3.2.1.23 {ECO:0000256|ARBA:ARBA00012756, ECO:0000256|RuleBase:RU000675};	Beta-galactosidase	GO:0048046,apoplast; GO:0009536,plastid; GO:0005773,vacuole; GO:0004565,beta-galactosidase activity; GO:0005975,carbohydrate metabolic process; GO:0003674,molecular_function; GO:0003824,catalytic activity; GO:0004553,hydrolase activity, hydrolyzing O-glycosyl compounds; GO:0015925,galactosidase activity; GO:0016787,hydrolase activity; GO:0016798,hydrolase activity, acting on glycosyl bonds; GO:00…	PF01301.22:Glycosyl hydrolases family 35	--	--	--
PmuVar_Chr8_1127	155.897	154.697	150.096	301.285	296.199	291.989	7738	8731	8352	17508	14378	14286	1.25107	1.2122e-100	6.00621e-99	up	Chr8	6528730	6533990	-	PmuVar_Chr8_1127	--	K01102 pyruvate dehydrogenase phosphatase [EC:3.1.3.43] | (RefSeq) probable protein phosphatase 2C 46 (A)	--	PREDICTED: uncharacterized protein LOC107881705 [Prunus mume]	P2C46_ARATH RecName: Full=Probable protein phosphatase 2C 46 {ECO:0000303|PubMed:19021904}; Short=AtPP2C46 {ECO:0000303|PubMed:19021904}; EC=3.1.3.16 {ECO:0000250|UniProtKB:Q9LHJ9}; Flags: Precursor;	A0A6J5Y121_PRUAR RecName: Full=Protein-serine/threonine phosphatase {ECO:0000256|ARBA:ARBA00013081}; EC=3.1.3.16 {ECO:0000256|ARBA:ARBA00013081};	Protein phosphatase 2C/pyruvate dehydrogenase (lipoamide) phosphatase	GO:0046872,metal ion binding; GO:0017018,myosin phosphatase activity; GO:0004722,protein serine/threonine phosphatase activity; GO:0035970,peptidyl-threonine dephosphorylation; GO:0003674,molecular_function; GO:0005488,binding; GO:0043167,ion binding; GO:0043169,cation binding; GO:0003824,catalytic activity; GO:0004721,phosphoprotein phosphatase activity; GO:0016787,hydrolase activity; GO:0016788…	PF04782.15:Protein of unknown function (DUF632)	--	--	--
PmuVar_Chr2_1284	450.238	431.15	439.191	956.243	896.161	872.327	6830	7437	7469	16983	13295	13044	1.34723	1.56066e-100	7.70805e-99	up	Chr2	10147827	10148827	+	PmuVar_Chr2_1284	--	K09873 aquaporin TIP | (RefSeq) LOW QUALITY PROTEIN: aquaporin TIP4-1 (A)	--	aquaporin TIP4-1 [Prunus avium]	TIP41_ARATH RecName: Full=Aquaporin TIP4-1; AltName: Full=Epsilon-tonoplast intrinsic protein; Short=Epsilon-TIP; AltName: Full=Tonoplast intrinsic protein 4-1; Short=AtTIP4;1;	A0A6J5W626_PRUAR SubName: Full=Uncharacterized protein {ECO:0000313|EMBL:CAB4297050.1};	Aquaporin (major intrinsic protein family)	GO:0042807,central vacuole; GO:0016021,integral component of membrane; GO:0016020,membrane; GO:0009705,plant-type vacuole membrane; GO:0015250,water channel activity; GO:0006833,water transport; GO:0003674,molecular_function; GO:0005215,transporter activity; GO:0005372,water transmembrane transporter activity; GO:0015267,channel activity; GO:0015318,inorganic molecular entity transmembrane transp…	PF00230.23:Major intrinsic protein	--	--	--
PmuVar_Chr7_0169	0.3302	0.2376	0.5221	6.8459	7.5202	8.1006	22	18	39	534	490	532	4.66648	2.10698e-100	1.03732e-98	up	Chr7	1618095	1622932	+	PmuVar_Chr7_0169	--	--	--	PREDICTED: myosin-11 [Prunus mume]	--	A0A6J5X8K6_PRUAR RecName: Full=C2 NT-type domain-containing protein {ECO:0000259|PROSITE:PS51840};	--	--	PF10358.12:N-terminal C2 in EEIG1 and EHBP1 proteins	--	--	--
PmuVar_Chr2_4624	101.732	106.272	105.645	25.2235	24.0475	24.988	2284	2713	2659	663	528	553	-1.77557	3.60052e-100	1.767e-98	down	Chr2	33989764	33992477	-	PmuVar_Chr2_4624	--	K00898 pyruvate dehydrogenase kinase 2/3/4 [EC:2.7.11.2] | (RefSeq) pyruvate dehydrogenase (acetyl-transferring) kinase, mitochondrial isoform X1 (A)	--	PREDICTED: pyruvate dehydrogenase (acetyl-transferring) kinase, mitochondrial isoform X2 [Prunus mume]	PDK_ARATH RecName: Full=[Pyruvate dehydrogenase (acetyl-transferring)] kinase, mitochondrial; Short=AtPDHK; Short=Pyruvate dehydrogenase kinase; EC=2.7.11.2;	A0A6J5VUL9_PRUAR RecName: Full=Protein-serine/threonine kinase {ECO:0000256|RuleBase:RU366032}; EC=2.7.11.- {ECO:0000256|RuleBase:RU366032};	Dehydrogenase kinase	GO:0005829,cytosol; GO:0005739,mitochondrion; GO:0005524,ATP binding; GO:0009927,histidine phosphotransfer kinase activity; GO:0042803,protein homodimerization activity; GO:0004740,pyruvate dehydrogenase (acetyl-transferring) kinase activity; GO:0046777,protein autophosphorylation; GO:0006468,protein phosphorylation; GO:0010906,regulation of glucose metabolic process; GO:0000166,nucleotide bindin…	PF10436.12:Mitochondrial branched-chain alpha-ketoacid dehydrogenase kinase	--	--	--
PmuVar_Chr2_0743	0.6521	1.0948	1.1898	20.6843	17.2758	14.1329	22	42	45	817	570	470	4.4409	3.79034e-100	1.85427e-98	up	Chr2	6490823	6493447	-	PmuVar_Chr2_0743	--	K20890 xylan alpha-glucuronosyltransferase [EC:2.4.1.-] | (RefSeq) LOW QUALITY PROTEIN: putative UDP-glucuronate:xylan alpha-glucuronosyltransferase 3 (A)	--	uncharacterized protein LOC117616769 isoform X1 [Prunus dulcis]	CALR3_ARATH RecName: Full=Calreticulin-3; AltName: Full=Protein PRIORITY IN SWEET LIFE 1; Flags: Precursor;	A0A5E4EGM3_PRUDU SubName: Full=PREDICTED: calreticulin-3 {ECO:0000313|EMBL:VVA13731.1};	Calreticulin	GO:0005783,endoplasmic reticulum; GO:0005788,endoplasmic reticulum lumen; GO:0005789,endoplasmic reticulum membrane; GO:0005576,extracellular region; GO:0005509,calcium ion binding; GO:0030246,carbohydrate binding; GO:0051082,unfolded protein binding; GO:0046283,anthocyanin-containing compound metabolic process; GO:0042742,defense response to bacterium; GO:0009626,plant-type hypersensitive respon…	PF00646.36:F-box domain	--	--	--
PmuVar_Chr6_0605	3072.95	3015.03	3447.65	981.217	953.354	1007.42	94537	105470	118905	35341	28683	30550	-1.39324	7.95747e-100	3.88058e-98	down	Chr6	5619805	5621380	+	PmuVar_Chr6_0605	--	--	--	putative extensin, partial [Prunus dulcis]	--	A7Y7G6_PRUDU SubName: Full=Putative extensin {ECO:0000313|EMBL:ABR13277.1}; Flags: Fragment;	--	--	--	--	--	--
PmuVar_Chr1_3862	12.3277	15.5205	15.858	99.5329	96.5974	82.9364	95	136	137	898	728	630	2.97312	1.57094e-98	7.63683e-97	up	Chr1	29701442	29702007	-	PmuVar_Chr1_3862	--	--	--	PREDICTED: uncharacterized protein At5g22580 [Prunus mume]	Y5258_ARATH RecName: Full=Stress-response A/B barrel domain-containing protein At5g22580 {ECO:0000305}; AltName: Full=Uncharacterized protein At5g22580;	A0A6J5XN01_PRUAR RecName: Full=Stress-response A/B barrel domain-containing protein {ECO:0000259|PROSITE:PS51502};	--	GO:0009507,chloroplast; GO:0005829,cytosol; GO:0009536,plastid; GO:0046872,metal ion binding; GO:0003674,molecular_function; GO:0005488,binding; GO:0043167,ion binding; GO:0043169,cation binding; GO:0005575,cellular_component; GO:0005622,intracellular anatomical structure; GO:0005737,cytoplasm; GO:0043226,organelle; GO:0043227,membrane-bounded organelle; GO:0043229,intracellular organelle; GO:004…	PF07876.15:Stress responsive A/B Barrel Domain	--	--	--
PmuVar_Chr8_0644	6.9626	6.8816	5.8973	31.0446	28.8369	28.8369	218	245	207	1138	883	890	2.47156	3.34089e-98	1.61902e-96	up	Chr8	3568119	3570644	+	PmuVar_Chr8_0644	--	K24193 MFS transporter, SP family, sugar:H+ symporter | (RefSeq) sugar transport protein 14 (A)	--	PREDICTED: sugar transport protein 14 [Prunus mume]	STP14_ARATH RecName: Full=Sugar transport protein 14; AltName: Full=Hexose transporter 14;	A0A6J5Y5M9_PRUAR RecName: Full=MFS domain-containing protein {ECO:0000259|PROSITE:PS50850};	Predicted transporter (major facilitator superfamily)	GO:0016021,integral component of membrane; GO:0005886,plasma membrane; GO:0015145,monosaccharide transmembrane transporter activity; GO:0015293,symporter activity; GO:0003674,molecular_function; GO:0005215,transporter activity; GO:0008509,anion transmembrane transporter activity; GO:0015075,ion transmembrane transporter activity; GO:0015144,carbohydrate transmembrane transporter activity; GO:0022…	PF00083.27:Sugar (and other) transporter	--	--	--
PmuVar_Chr6_0505	92.1009	87.3521	84.6269	215.839	213.654	194.201	1861	2007	1917	5106	4222	3868	1.5416	5.87413e-98	2.83775e-96	up	Chr6	4676331	4677329	-	PmuVar_Chr6_0505	--	--	--	PREDICTED: uncharacterized protein LOC103336454 [Prunus mume]	--	A0A6J5Y515_PRUAR SubName: Full=Uncharacterized protein {ECO:0000313|EMBL:CAB4319477.1};	--	GO:0016021,integral component of membrane; GO:0005575,cellular_component; GO:0016020,membrane; GO:0031224,intrinsic component of membrane; GO:0110165,cellular anatomical entity	--	--	--	--
PmuVar_Chr5_2139	45.7224	42.7732	39.6195	141.881	141.799	134.669	455	484	442	1653	1380	1321	2.01	7.14368e-98	3.44032e-96	up	Chr5	21621196	21621687	-	PmuVar_Chr5_2139	--	K16281 RING-H2 zinc finger protein RHA1 | (RefSeq) E3 ubiquitin-protein ligase RHA1B (A)	--	E3 ubiquitin-protein ligase RHA1B [Prunus persica]	BRH1_ARATH RecName: Full=Brassinosteroid-responsive RING protein 1 {ECO:0000303|PubMed:12012249};	M5X1D1_PRUPE RecName: Full=RING-type domain-containing protein {ECO:0000259|PROSITE:PS50089};	FOG: Predicted E3 ubiquitin ligase	GO:0016021,integral component of membrane; GO:0061630,ubiquitin protein ligase activity; GO:0008270,zinc ion binding; GO:0009742,brassinosteroid mediated signaling pathway; GO:0016567,protein ubiquitination; GO:1901371,regulation of leaf morphogenesis; GO:1905421,regulation of plant organ morphogenesis; GO:0009741,response to brassinosteroid; GO:0010200,response to chitin; GO:0003674,molecular_fu…	PF13639.9:Ring finger domain	--	--	--
PmuVar_Chr3_1646	85.7579	88.1372	92.5165	194.524	187.095	205.557	3653	4269	4418	9701	7794	8631	1.44322	1.11602e-97	5.35796e-96	up	Chr3	11395992	11401477	-	PmuVar_Chr3_1646	--	--	--	PREDICTED: C2 domain-containing protein At1g53590 isoform X1 [Prunus mume]	C2D61_ARATH RecName: Full=C2 domain-containing protein At1g53590; AltName: Full=N-terminal-TM-C2 domain type 6 protein 1; Short=NTMC2TYPE6.1;	M5X2U2_PRUPE SubName: Full=Uncharacterized protein {ECO:0000313|EMBL:EMJ15848.1};	Ca2+-dependent lipid-binding protein CLB1/vesicle protein vp115/Granuphilin A, contains C2 domain	GO:0016021,integral component of membrane; GO:0000325,plant-type vacuole; GO:0008289,lipid binding; GO:0046872,metal ion binding; GO:0006869,lipid transport; GO:0003674,molecular_function; GO:0005488,binding; GO:0043167,ion binding; GO:0043169,cation binding; GO:0006810,transport; GO:0006811,ion transport; GO:0006820,anion transport; GO:0008150,biological_process; GO:0010876,lipid localization; G…	PF00168.33:C2 domain	--	--	--
PmuVar_Chr2_2018	1.5832	1.4557	2.0799	10.708	10.729	10.0168	110	115	162	871	729	686	2.92112	1.63965e-97	7.84748e-96	up	Chr2	14522039	14525473	+	PmuVar_Chr2_2018	--	K13415 protein brassinosteroid insensitive 1 [EC:2.7.10.1 2.7.11.1] | (RefSeq) systemin receptor SR160 (A)	ko04075: Plant hormone signal transduction	unnamed protein product [Prunus armeniaca]	Y4361_ARATH RecName: Full=Probable LRR receptor-like serine/threonine-protein kinase At4g36180; EC=2.7.11.1; Flags: Precursor;	A0A6J5TNX3_PRUAR RecName: Full=Protein kinase domain-containing protein {ECO:0000259|PROSITE:PS50011};	--	GO:0016021,integral component of membrane; GO:0005886,plasma membrane; GO:0090406,pollen tube; GO:0005524,ATP binding; GO:0016301,kinase activity; GO:0106310,protein serine kinase activity; GO:0004674,protein serine/threonine kinase activity; GO:0006468,protein phosphorylation; GO:0000166,nucleotide binding; GO:0003674,molecular_function; GO:0005488,binding; GO:0017076,purine nucleotide binding; …	PF13855.9:Leucine rich repeat	--	--	--
PmuVar_Chr2_2596	46.8231	50.4711	47.3009	6.0032	6.7406	5.114	966	1184	1094	145	136	104	-2.71657	3.4583e-97	1.65006e-95	down	Chr2	18137843	18138862	-	PmuVar_Chr2_2596	--	K13434 pathogenesis-related genes transcriptional activator PTI6 | (RefSeq) pathogenesis-related genes transcriptional activator PTI6-like (A)	ko04626: Plant-pathogen interaction	hypothetical protein GBA52_002606 [Prunus armeniaca]	EF118_ARATH RecName: Full=Ethylene-responsive transcription factor ERF118;	A0A6J5TLS2_PRUAR RecName: Full=AP2/ERF domain-containing protein {ECO:0000259|PROSITE:PS51032};	--	GO:0005634,nucleus; GO:0003700,DNA-binding transcription factor activity; GO:0000976,transcription regulatory region sequence-specific DNA binding; GO:0009873,ethylene-activated signaling pathway; GO:0003674,molecular_function; GO:0140110,transcription regulator activity; GO:0001067,regulatory region nucleic acid binding; GO:0003676,nucleic acid binding; GO:0003677,DNA binding; GO:0003690,double-…	PF00847.23:AP2 domain	AP2/ERF-ERF	TF	AP2/ERF->AP2/ERF-ERF
PmuVar_Chr2_1578	58.0352	58.4506	63.9377	7.4481	8.1058	10.2007	1391	1593	1718	209	190	241	-2.50909	4.5143e-97	2.14728e-95	down	Chr2	11979329	11982133	-	PmuVar_Chr2_1578	--	K00826 branched-chain amino acid aminotransferase [EC:2.6.1.42] | (RefSeq) branched-chain-amino-acid aminotransferase 2, chloroplastic-like isoform X1 (A)	ko00270: Cysteine and methionine metabolism; ko00280: Valine, leucine and isoleucine degradation; ko00290: Valine, leucine and isoleucine biosynthesis; ko00770: Pantothenate and CoA biosynthesis; ko00966: Glucosinolate biosynthesis; ko01100: Metabolic pathways; ko01110: Biosynthesis of secondary metabolites; ko01210: 2-Oxocarboxylic acid metabolism; ko01230: Biosynthesis of amino acids; ko01240: …	PREDICTED: branched-chain-amino-acid aminotransferase 2, chloroplastic-like isoform X2 [Prunus mume]	BCAT1_HUMLU RecName: Full=Branched-chain amino acid aminotransferase 1, mitochondrial {ECO:0000303|PubMed:23347725}; Short=HlBCAT1 {ECO:0000303|PubMed:23347725}; EC=2.6.1.42 {ECO:0000269|PubMed:23347725}; Flags: Precursor;	A0A251RBJ1_PRUPE RecName: Full=Branched-chain-amino-acid aminotransferase {ECO:0000256|RuleBase:RU004517}; EC=2.6.1.42 {ECO:0000256|RuleBase:RU004517};	Branched chain aminotransferase BCAT1, pyridoxal phosphate enzymes type IV superfamily	GO:0005739,mitochondrion; GO:0052656,L-isoleucine transaminase activity; GO:0052654,L-leucine transaminase activity; GO:0050048,L-leucine:2-oxoglutarate aminotransferase activity; GO:0052655,L-valine transaminase activity; GO:0009097,isoleucine biosynthetic process; GO:0009098,leucine biosynthetic process; GO:0009099,valine biosynthetic process; GO:0003674,molecular_function; GO:0003824,catalytic…	PF01063.22:Amino-transferase class IV	--	--	--
PmuVar_Chr4_1939	30.1475	30.4774	29.5296	82.3335	76.6244	77.5217	836	961	918	2673	2078	2119	1.694	5.2338e-97	2.48188e-95	up	Chr4	16921893	16931003	-	PmuVar_Chr4_1939	--	K03676 glutaredoxin 3 | (RefSeq) glutaredoxin-C1-like (A)	--	PREDICTED: glutaredoxin-C5 [Prunus mume]	MUB4_ARATH RecName: Full=Membrane-anchored ubiquitin-fold protein 4; Short=AtMUB4; Short=Membrane-anchored ub-fold protein 4; Flags: Precursor;	M5WW88_PRUPE RecName: Full=Glutaredoxin domain-containing protein {ECO:0000259|Pfam:PF00462};	--	GO:0005886,plasma membrane; GO:0005575,cellular_component; GO:0016020,membrane; GO:0071944,cell periphery; GO:0110165,cellular anatomical entity	PF00462.27:Glutaredoxin	--	--	--
PmuVar_Chr4_0664	44.6	41.9754	43.8604	113.054	104.907	123.656	1981	2120	2184	5879	4557	5414	1.69278	1.23086e-96	5.8189e-95	up	Chr4	6864555	6866750	+	PmuVar_Chr4_0664	--	K10268 F-box and leucine-rich repeat protein 2/20 | (RefSeq) F-box/LRR-repeat protein 2 isoform X2 (A)	--	PREDICTED: F-box/LRR-repeat MAX2 homolog A-like [Prunus mume]	MAX2A_PETHY RecName: Full=F-box/LRR-repeat MAX2 homolog A; AltName: Full=F-box and leucine-rich repeat MAX2 homolog A;	M5WR77_PRUPE SubName: Full=Uncharacterized protein {ECO:0000313|EMBL:EMJ16184.1};	--	--	PF18511.4:F-box	--	--	--
PmuVar_Chr2_2250	15.5107	12.7071	14.7416	57.2128	57.3044	50.4846	336	313	358	1451	1214	1078	2.24508	1.28039e-96	6.03464e-95	up	Chr2	16010610	16014688	-	PmuVar_Chr2_2250	--	K01915 glutamine synthetase [EC:6.3.1.2] | (RefSeq) glutamine synthetase nodule isozyme-like (A)	ko00220: Arginine biosynthesis; ko00250: Alanine, aspartate and glutamate metabolism; ko00630: Glyoxylate and dicarboxylate metabolism; ko00910: Nitrogen metabolism; ko01100: Metabolic pathways; ko01230: Biosynthesis of amino acids	PREDICTED: glutamine synthetase nodule isozyme-like [Prunus mume]	GLNA_VIGAC RecName: Full=Glutamine synthetase nodule isozyme; Short=GS; EC=6.3.1.2; AltName: Full=Glutamate--ammonia ligase;	A0A5E4EGB3_PRUDU RecName: Full=Glutamine synthetase {ECO:0000256|ARBA:ARBA00012937, ECO:0000256|RuleBase:RU004356}; EC=6.3.1.2 {ECO:0000256|ARBA:ARBA00012937, ECO:0000256|RuleBase:RU004356};	Glutamine synthetase	GO:0005737,cytoplasm; GO:0005524,ATP binding; GO:0004356,glutamate-ammonia ligase activity; GO:0006542,glutamine biosynthetic process; GO:0000166,nucleotide binding; GO:0003674,molecular_function; GO:0005488,binding; GO:0017076,purine nucleotide binding; GO:0030554,adenyl nucleotide binding; GO:0032553,ribonucleotide binding; GO:0032555,purine ribonucleotide binding; GO:0032559,adenyl ribonucleot…	PF00120.27:Glutamine synthetase, catalytic domain	--	--	--
PmuVar_Chr4_1158	126.703	127.761	131.78	30.2535	34.979	27.2939	3452	3958	4025	965	932	733	-1.76162	1.60733e-96	7.55249e-95	down	Chr4	11011107	11013806	-	PmuVar_Chr4_1158	--	--	--	PREDICTED: uncharacterized protein LOC103327924 [Prunus mume]	--	A0A6J5UAK5_PRUAR SubName: Full=Uncharacterized protein {ECO:0000313|EMBL:CAB4272637.1};	Spindle pole body protein	GO:0015031,protein transport; GO:0006810,transport; GO:0006811,ion transport; GO:0006820,anion transport; GO:0008104,protein localization; GO:0008150,biological_process; GO:0015833,peptide transport; GO:0033036,macromolecule localization; GO:0042886,amide transport; GO:0045184,establishment of protein localization; GO:0051179,localization; GO:0051234,establishment of localization; GO:0071702,orga…	PF03398.17:Regulator of Vps4 activity in the MVB pathway	--	--	--
PmuVar_Chr7_0513	6.8667	5.586	3.9048	51.0272	52.3975	48.0669	80	74	51	696	597	552	3.51937	2.76644e-96	1.29595e-94	up	Chr7	4520938	4521612	-	PmuVar_Chr7_0513	--	--	--	PREDICTED: mavicyanin [Prunus mume]	ENL3_ARATH RecName: Full=Early nodulin-like protein 3; AltName: Full=Phytocyanin-like protein; Flags: Precursor;	A0A6P5SSA8_PRUAV SubName: Full=mavicyanin {ECO:0000313|RefSeq:XP_021816573.1};	--	GO:0031225,anchored component of membrane; GO:0046658,anchored component of plasma membrane; GO:0005886,plasma membrane; GO:0009506,plasmodesma; GO:0009536,plastid; GO:0009055,electron transfer activity; GO:0003674,molecular_function; GO:0003824,catalytic activity; GO:0016491,oxidoreductase activity; GO:0005575,cellular_component; GO:0016020,membrane; GO:0031224,intrinsic component of membrane; G…	PF02298.20:Plastocyanin-like domain	--	--	--
PmuVar_Chr5_2812	0.8002	0.6367	0.7478	8.8039	9.2342	8.0599	42	38	44	541	474	417	3.88421	5.81605e-96	2.71632e-94	up	Chr5	26125746	26129723	+	PmuVar_Chr5_2812	--	K22706 (R)-mandelonitrile beta-glucosyltransferase [EC:2.4.1.354] | (RefSeq) 7-deoxyloganetin glucosyltransferase-like (A)	ko00460: Cyanoamino acid metabolism; ko01100: Metabolic pathways; ko01110: Biosynthesis of secondary metabolites	hypothetical protein CUMW_140680 [Citrus unshiu]	U76F1_ARATH RecName: Full=UDP-glycosyltransferase 76F1; EC=2.4.1.-;	A0A2H5PIX4_CITUN RecName: Full=UDPGT domain-containing protein {ECO:0000259|PROSITE:PS00375};	UDP-glucuronosyl and UDP-glucosyl transferase	GO:0080043,quercetin 3-O-glucosyltransferase activity; GO:0080044,quercetin 7-O-glucosyltransferase activity; GO:0003674,molecular_function; GO:0003824,catalytic activity; GO:0008194,UDP-glycosyltransferase activity; GO:0016740,transferase activity; GO:0016757,transferase activity, transferring glycosyl groups; GO:0016758,transferase activity, transferring hexosyl groups; GO:0035251,UDP-glucosylt…	PF00201.21:UDP-glucoronosyl and UDP-glucosyl transferase	--	--	--
PmuVar_Chr3_0926	66.1326	74.6107	69.2009	162.242	162.527	177.188	2496	3202	2928	7169	5999	6592	1.55976	7.93848e-96	3.69641e-94	up	Chr3	5565240	5569793	+	PmuVar_Chr3_0926	--	K03294 basic amino acid/polyamine antiporter, APA family | (RefSeq) cationic amino acid transporter 1-like (A)	--	PREDICTED: cationic amino acid transporter 1-like [Prunus mume]	CAAT1_ARATH RecName: Full=Cationic amino acid transporter 1; AltName: Full=Amino acid transporter 1;	A0A6J5WZ39_PRUAR RecName: Full=AA_permease_C domain-containing protein {ECO:0000259|Pfam:PF13906};	Amino acid transporters	GO:0016021,integral component of membrane; GO:0016020,membrane; GO:0005886,plasma membrane; GO:0015171,amino acid transmembrane transporter activity; GO:0005313,L-glutamate transmembrane transporter activity; GO:0015189,L-lysine transmembrane transporter activity; GO:0006865,amino acid transport; GO:0003674,molecular_function; GO:0005215,transporter activity; GO:0005342,organic acid transmembrane…	PF13520.9:Amino acid permease	--	--	--
PmuVar_Chr6_1562	345.54	347.698	344.854	681.269	668.052	725.729	12706	14538	14216	29329	24024	26305	1.30189	1.52551e-95	7.08194e-94	up	Chr6	11640932	11642973	-	PmuVar_Chr6_1562	--	K00021 hydroxymethylglutaryl-CoA reductase (NADPH) [EC:1.1.1.34] | (RefSeq) 3-hydroxy-3-methylglutaryl-coenzyme A reductase 1 (A)	ko00900: Terpenoid backbone biosynthesis; ko01100: Metabolic pathways; ko01110: Biosynthesis of secondary metabolites	PREDICTED: 3-hydroxy-3-methylglutaryl-coenzyme A reductase 1 [Prunus mume]	HMDH1_GOSHI RecName: Full=3-hydroxy-3-methylglutaryl-coenzyme A reductase 1; Short=HMG-CoA reductase 1; EC=1.1.1.34;	A0A6J5YCU1_PRUAR RecName: Full=3-hydroxy-3-methylglutaryl coenzyme A reductase {ECO:0000256|RuleBase:RU361219}; Short=HMG-CoA reductase {ECO:0000256|RuleBase:RU361219}; EC=1.1.1.34 {ECO:0000256|RuleBase:RU361219};	3-hydroxy-3-methylglutaryl-CoA (HMG-CoA) reductase	GO:0005789,endoplasmic reticulum membrane; GO:0016021,integral component of membrane; GO:0031966,mitochondrial membrane; GO:0005778,peroxisomal membrane; GO:0042170,plastid membrane; GO:0004420,hydroxymethylglutaryl-CoA reductase (NADPH) activity; GO:0015936,coenzyme A metabolic process; GO:0008299,isoprenoid biosynthetic process; GO:0016126,sterol biosynthetic process; GO:0003674,molecular_funct…	PF00368.21:Hydroxymethylglutaryl-coenzyme A reductase	--	--	--
PmuVar_Chr7_0538	0.4972	0.7809	0.4435	16.5945	15.5803	15.0254	14	25	14	547	429	417	5.07164	1.81349e-95	8.39364e-94	up	Chr7	4672852	4675491	-	PmuVar_Chr7_0538	--	--	--	PREDICTED: uncharacterized protein LOC103337864 [Prunus mume]	BDG3_ARATH RecName: Full=Probable lysophospholipase BODYGUARD 3 {ECO:0000303|PubMed:16415209}; Short=AtBDG3 {ECO:0000303|PubMed:16415209}; EC=3.1.1.- {ECO:0000305}; Flags: Precursor;	A0A6J5XIB9_PRUAR RecName: Full=AB hydrolase-1 domain-containing protein {ECO:0000259|Pfam:PF00561};	Predicted hydrolase/acyltransferase (alpha/beta hydrolase superfamily)	GO:0005576,extracellular region; GO:0005886,plasma membrane; GO:0016787,hydrolase activity; GO:0071555,cell wall organization; GO:0003674,molecular_function; GO:0003824,catalytic activity; GO:0008150,biological_process; GO:0009987,cellular process; GO:0016043,cellular component organization; GO:0045229,external encapsulating structure organization; GO:0071554,cell wall organization or biogenesis;…	PF00561.23:alpha/beta hydrolase fold	--	--	--
PmuVar_Chr3_0399	1.3504	1.2603	1.4258	15.7948	13.8926	20.5212	49	52	58	671	493	734	3.94231	6.96512e-95	3.21414e-93	up	Chr3	2305181	2307215	-	PmuVar_Chr3_0399	--	K00422 polyphenol oxidase [EC:1.10.3.1] | (RefSeq) polyphenol oxidase, chloroplastic-like (A)	ko00350: Tyrosine metabolism; ko00950: Isoquinoline alkaloid biosynthesis; ko01100: Metabolic pathways; ko01110: Biosynthesis of secondary metabolites	hypothetical protein GBA52_012812 [Prunus armeniaca]	PPO_PRUAR RecName: Full=Polyphenol oxidase latent form, chloroplastic {ECO:0000303|PubMed:28812349}; Short=L-PaPPO {ECO:0000303|PubMed:28812349}; Short=PA-PPO {ECO:0000303|PubMed:10198084}; Contains: RecName: Full=Polyphenol oxidase active form, chloroplastic {ECO:0000303|PubMed:28812349}; Short=A-PaPPO {ECO:0000303|PubMed:28812349}; EC=1.10.3.1 {ECO:0000269|PubMed:10198084, ECO:0000269|PubMed:28…	A0A6J5WXB6_PRUAR SubName: Full=Uncharacterized protein {ECO:0000313|EMBL:CAB4306396.1};	--	GO:0009543,chloroplast thylakoid lumen; GO:0004097,catechol oxidase activity; GO:0046872,metal ion binding; GO:0046148,pigment biosynthetic process; GO:0003674,molecular_function; GO:0003824,catalytic activity; GO:0016491,oxidoreductase activity; GO:0016679,oxidoreductase activity, acting on diphenols and related substances as donors; GO:0016682,oxidoreductase activity, acting on diphenols and re…	PF12143.11:Protein of unknown function (DUF_B2219)	--	--	--
PmuVar_Chr7_1026	14.1751	15.3556	14.9368	51.9381	49.254	62.7901	535	659	632	2295	1818	2336	2.18603	7.16082e-95	3.29462e-93	up	Chr7	7439243	7441765	+	PmuVar_Chr7_1026	--	--	--	hypothetical protein GBA52_017495 [Prunus armeniaca]	TORL3_ARATH RecName: Full=TORTIFOLIA1-like protein 3 {ECO:0000303|PubMed:15324671};	A0A6J5XH55_PRUAR SubName: Full=Uncharacterized protein {ECO:0000313|EMBL:CAB4311282.1};	--	GO:0005874,microtubule; GO:0008017,microtubule binding; GO:0003674,molecular_function; GO:0005488,binding; GO:0005515,protein binding; GO:0008092,cytoskeletal protein binding; GO:0015631,tubulin binding; GO:0005575,cellular_component; GO:0005622,intracellular anatomical structure; GO:0005856,cytoskeleton; GO:0015630,microtubule cytoskeleton; GO:0043226,organelle; GO:0043228,non-membrane-bounded o…	PF02985.25:HEAT repeat	--	--	--
PmuVar_Chr5_2515	514.731	522.326	506.431	1058.59	1160.2	1263.3	22488	25948	24804	54146	49571	54404	1.47593	9.44654e-95	4.33336e-93	up	Chr5	24207102	24210549	-	PmuVar_Chr5_2515	--	K10775 phenylalanine ammonia-lyase [EC:4.3.1.24] | (RefSeq) phenylalanine ammonia-lyase 1 (A)	ko00360: Phenylalanine metabolism; ko00940: Phenylpropanoid biosynthesis; ko01100: Metabolic pathways; ko01110: Biosynthesis of secondary metabolites	unnamed protein product [Prunus armeniaca]	PAL1_RUBID RecName: Full=Phenylalanine ammonia-lyase 1; EC=4.3.1.24 {ECO:0000250|UniProtKB:P24481}; AltName: Full=RiPAL1;	A0A6J5U570_PRUAR RecName: Full=Phenylalanine ammonia-lyase {ECO:0000256|ARBA:ARBA00012139, ECO:0000256|RuleBase:RU003955}; EC=4.3.1.24 {ECO:0000256|ARBA:ARBA00012139, ECO:0000256|RuleBase:RU003955};	Phenylalanine and histidine ammonia-lyase	GO:0005737,cytoplasm; GO:0045548,phenylalanine ammonia-lyase activity; GO:0009800,cinnamic acid biosynthetic process; GO:0006559,L-phenylalanine catabolic process; GO:0003674,molecular_function; GO:0003824,catalytic activity; GO:0016829,lyase activity; GO:0016840,carbon-nitrogen lyase activity; GO:0016841,ammonia-lyase activity; GO:0006082,organic acid metabolic process; GO:0006725,cellular aroma…	PF00221.22:Aromatic amino acid lyase	--	--	--
PmuVar_Chr2_4968	141.188	134.713	129.891	293.348	293.706	283.91	2296	2491	2368	5585	4671	4551	1.40379	1.619e-94	7.40477e-93	up	Chr2	36362301	36366022	+	PmuVar_Chr2_4968	--	K10144 RING finger and CHY zinc finger domain-containing protein 1 [EC:2.3.2.27] | (RefSeq) E3 ubiquitin-protein ligase MIEL1 (A)	ko04120: Ubiquitin mediated proteolysis	PREDICTED: E3 ubiquitin-protein ligase MIEL1 [Prunus mume]	MIEL1_ARATH RecName: Full=E3 ubiquitin-protein ligase MIEL1 {ECO:0000303|PubMed:23403577}; EC=2.3.2.27 {ECO:0000305}; AltName: Full=MYB30-interacting E3 ligase 1 {ECO:0000303|PubMed:23403577}; AltName: Full=Pirh2-like protein 1 {ECO:0000303|PubMed:21526181}; Short=AtPILP1 {ECO:0000303|PubMed:21526181}; AltName: Full=RING-type E3 ubiquitin transferase MIEL1 {ECO:0000305};	A0A6J5VW84_PRUAR SubName: Full=Uncharacterized protein {ECO:0000313|EMBL:CAB4293346.1};	Zn-finger protein	GO:0005737,cytoplasm; GO:0005634,nucleus; GO:0061630,ubiquitin protein ligase activity; GO:0004842,ubiquitin-protein transferase activity; GO:0008270,zinc ion binding; GO:0006952,defense response; GO:1900425,negative regulation of defense response to bacterium; GO:1901485,positive regulation of transcription factor catabolic process; GO:0016567,protein ubiquitination; GO:0006511,ubiquitin-depende…	PF14599.9:Zinc-ribbon	--	--	--
PmuVar_Chr2_4974	100.282	101.236	95.6265	16.8918	15.6719	13.7931	1217	1397	1301	240	186	165	-2.37528	3.78896e-94	1.72783e-92	down	Chr2	36397057	36398706	-	PmuVar_Chr2_4974	--	--	--	PREDICTED: CASP-like protein 1E1 [Prunus mume]	CSPL5_VITVI RecName: Full=CASP-like protein 1E2; Short=VvCASPL1E2;	A0A6J5TFV4_PRUAR RecName: Full=CASP-like protein {ECO:0000256|RuleBase:RU361233};	--	GO:0016021,integral component of membrane; GO:0005886,plasma membrane; GO:0051539,4 iron, 4 sulfur cluster binding; GO:0003674,molecular_function; GO:0005488,binding; GO:0051536,iron-sulfur cluster binding; GO:0051540,metal cluster binding; GO:0005575,cellular_component; GO:0016020,membrane; GO:0031224,intrinsic component of membrane; GO:0110165,cellular anatomical entity; GO:0071944,cell periphe…	PF04535.15:Casparian strip membrane protein domain	--	--	--
PmuVar_Chr2_4877	39.7909	35.9951	35.8324	158.221	119.235	140.241	734	755	741	3417	2151	2550	2.209	5.4909e-94	2.49659e-92	up	Chr2	35726360	35727271	-	PmuVar_Chr2_4877	--	K19038 E3 ubiquitin-protein ligase ATL41 [EC:2.3.2.27] | (RefSeq) LOW QUALITY PROTEIN: E3 ubiquitin-protein ligase ATL41-like (A)	--	hypothetical protein GBA52_004460 [Prunus armeniaca]	ATL2_ARATH RecName: Full=RING-H2 finger protein ATL2; EC=2.3.2.27 {ECO:0000305}; AltName: Full=Protein ARABIDOPSIS TOXICOS EN LEVADURA 2; Short=Protein ATL2; AltName: Full=RING-type E3 ubiquitin transferase ATL2 {ECO:0000305};	A0A6J5TFG5_PRUAR RecName: Full=RING-type domain-containing protein {ECO:0000259|PROSITE:PS50089};	FOG: Predicted E3 ubiquitin ligase	GO:0016021,integral component of membrane; GO:0046872,metal ion binding; GO:0061630,ubiquitin protein ligase activity; GO:0006952,defense response; GO:0003674,molecular_function; GO:0005488,binding; GO:0043167,ion binding; GO:0043169,cation binding; GO:0003824,catalytic activity; GO:0004842,ubiquitin-protein transferase activity; GO:0016740,transferase activity; GO:0019787,ubiquitin-like protein …	PF13639.9:Ring finger domain	--	--	--
PmuVar_Chr7_0094	454.827	467.035	431.592	1176.61	1006.6	1045.68	7148	8346	7604	21649	15471	16199	1.55706	8.23153e-94	3.73171e-92	up	Chr7	991206	992285	-	PmuVar_Chr7_0094	--	K09286 EREBP-like factor | (RefSeq) dehydration-responsive element-binding protein 3 (A)	--	PREDICTED: ethylene-responsive transcription factor ERF027-like [Prunus mume]	ERF26_ARATH RecName: Full=Ethylene-responsive transcription factor ERF026;	A0A6J5UXE7_PRUAR RecName: Full=AP2/ERF domain-containing protein {ECO:0000259|PROSITE:PS51032};	--	GO:0005634,nucleus; GO:0003677,DNA binding; GO:0003700,DNA-binding transcription factor activity; GO:0009873,ethylene-activated signaling pathway; GO:0003674,molecular_function; GO:0003676,nucleic acid binding; GO:0005488,binding; GO:0097159,organic cyclic compound binding; GO:1901363,heterocyclic compound binding; GO:0140110,transcription regulator activity; GO:0000160,phosphorelay signal transd…	PF00847.23:AP2 domain	AP2/ERF-ERF	TF	AP2/ERF->AP2/ERF-ERF
PmuVar_Chr6_1492	60.0697	56.3442	58.019	187.742	164.327	186.876	616	657	667	2254	1648	1889	1.93172	1.47279e-93	6.65726e-92	up	Chr6	11258380	11259390	-	PmuVar_Chr6_1492	--	--	--	uncharacterized protein Pyn_05225 [Prunus yedoensis var. nudiflora]	Y5848_ARATH RecName: Full=Uncharacterized protein At5g48480;	A0A314U8C5_PRUYE RecName: Full=VOC domain-containing protein {ECO:0000259|PROSITE:PS51819};	--	GO:0005829,cytosol; GO:0005575,cellular_component; GO:0005622,intracellular anatomical structure; GO:0005737,cytoplasm; GO:0110165,cellular anatomical entity	PF00903.28:Glyoxalase/Bleomycin resistance protein/Dioxygenase superfamily	--	--	--
PmuVar_Chr4_2506	11.6756	11.2373	11.9508	36.2429	47.0855	51.0128	678	742	778	2464	2674	2920	2.2475	3.34552e-93	1.50783e-91	up	Chr4	20041333	20045139	-	PmuVar_Chr4_2506	--	--	--	PREDICTED: protein LONGIFOLIA 1 isoform X1 [Prunus mume]	LNG1_ARATH RecName: Full=Protein LONGIFOLIA 1; AltName: Full=Protein TON1 RECRUITING MOTIF 2;	A0A251Q5B3_PRUPE RecName: Full=DUF4378 domain-containing protein {ECO:0000259|Pfam:PF14309};	--	GO:0005829,cytosol; GO:0005634,nucleus; GO:0051513,regulation of monopolar cell growth; GO:0009826,unidimensional cell growth; GO:0000902,cell morphogenesis; GO:0001558,regulation of cell growth; GO:0008150,biological_process; GO:0009653,anatomical structure morphogenesis; GO:0009987,cellular process; GO:0016043,cellular component organization; GO:0016049,cell growth; GO:0022603,regulation of ana…	PF14309.9:Domain of unknown function (DUF4378)	--	--	--
PmuVar_Chr1_2687	1.2404	1.5584	1.3436	37.1589	36.4209	38.0221	14	20	17	491	402	423	5.04918	3.54224e-93	1.59185e-91	up	Chr1	21005699	21006527	-	PmuVar_Chr1_2687	--	--	--	PREDICTED: protein YLS3-like [Prunus mume]	LTPG6_ARATH RecName: Full=Non-specific lipid transfer protein GPI-anchored 6 {ECO:0000303|PubMed:23893219}; Short=AtLTPG-6 {ECO:0000303|PubMed:23893219}; Short=Protein LTP-GPI-ANCHORED 6 {ECO:0000303|PubMed:23893219}; AltName: Full=Xylogen like protein 6 {ECO:0000303|PubMed:21558309}; Short=AtXYLP6 {ECO:0000303|PubMed:21558309}; Short=AtXYP12 {ECO:0000303|PubMed:21558309}; Flags: Precursor;	A0A6J5UYC9_PRUAR RecName: Full=AAI domain-containing protein {ECO:0000259|SMART:SM00499};	--	GO:0031225,anchored component of membrane; GO:0005634,nucleus; GO:0005886,plasma membrane; GO:0050832,defense response to fungus; GO:0006950,response to stress; GO:0006952,defense response; GO:0008150,biological_process; GO:0009605,response to external stimulus; GO:0009607,response to biotic stimulus; GO:0009620,response to fungus; GO:0043207,response to external biotic stimulus; GO:0044419,biolo…	PF14368.9:Probable lipid transfer	--	--	--
PmuVar_Chr2_2161	95.4476	102.36	97.0638	22.2096	25.1836	26.7271	4170	5085	4754	1136	1076	1151	-1.69166	7.17066e-93	3.21308e-91	down	Chr2	15384845	15387851	+	PmuVar_Chr2_2161	--	K03798 cell division protease FtsH [EC:3.4.24.-] | (RefSeq) ATP-dependent zinc metalloprotease FTSH, chloroplastic (A)	--	PREDICTED: ATP-dependent zinc metalloprotease FTSH, chloroplastic [Prunus mume]	FTSH_TOBAC RecName: Full=ATP-dependent zinc metalloprotease FTSH, chloroplastic; EC=3.4.24.-; AltName: Full=DS9; Flags: Precursor;	A0A6J5W858_PRUAR RecName: Full=AAA domain-containing protein {ECO:0000259|SMART:SM00382};	AAA+-type ATPase containing the peptidase M41 domain	GO:0031969,chloroplast membrane; GO:0009534,chloroplast thylakoid; GO:0016021,integral component of membrane; GO:0005524,ATP binding; GO:0016887,ATPase activity; GO:0004176,ATP-dependent peptidase activity; GO:0046872,metal ion binding; GO:0004222,metalloendopeptidase activity; GO:0007049,cell cycle; GO:0051301,cell division; GO:0006508,proteolysis; GO:0000166,nucleotide binding; GO:0003674,molec…	PF01434.21:Peptidase family M41	--	--	--
PmuVar_Chr2_4231	66.7622	61.1807	68.1225	164.905	167.654	154.526	952	992	1089	2753	2338	2172	1.61516	7.52968e-93	3.3642e-91	up	Chr2	30340700	30341598	+	PmuVar_Chr2_4231	--	--	--	PREDICTED: uncharacterized protein LOC103323594 [Prunus mume]	--	A0A6J5VTJ6_PRUAR SubName: Full=Uncharacterized protein {ECO:0000313|EMBL:CAB4292609.1};	--	--	--	--	--	--
PmuVar_Chr7_1539	7.704	7.4989	7.05	28.8344	25.9273	29.2392	309	342	317	1354	1017	1156	2.22041	7.90305e-93	3.52084e-91	up	Chr7	10578803	10581317	-	PmuVar_Chr7_1539	--	K13415 protein brassinosteroid insensitive 1 [EC:2.7.10.1 2.7.11.1] | (RefSeq) systemin receptor SR160 (A)	ko04075: Plant hormone signal transduction	PREDICTED: probable inactive receptor kinase At1g48480 [Prunus mume]	Y1848_ARATH RecName: Full=Probable inactive receptor kinase At1g48480; Flags: Precursor;	A0A6J5V679_PRUAR RecName: Full=Protein kinase domain-containing protein {ECO:0000259|PROSITE:PS50011};	--	GO:0016021,integral component of membrane; GO:0005634,nucleus; GO:0000325,plant-type vacuole; GO:0005886,plasma membrane; GO:0009506,plasmodesma; GO:0005524,ATP binding; GO:0042802,identical protein binding; GO:0004672,protein kinase activity; GO:0006468,protein phosphorylation; GO:0000166,nucleotide binding; GO:0003674,molecular_function; GO:0005488,binding; GO:0017076,purine nucleotide binding;…	PF00069.28:Protein kinase domain	--	--	--
PmuVar_Chr4_0689	10.1194	10.9654	9.8325	37.1051	36.7332	38.2776	280	345	305	1202	994	1044	2.16016	8.53837e-93	3.79295e-91	up	Chr4	7106221	7107588	+	PmuVar_Chr4_0689	--	K16818 phospholipase A1 [EC:3.1.1.32] | (RefSeq) phospholipase A(1) DAD1, chloroplastic-like (A)	ko00564: Glycerophospholipid metabolism; ko00592: alpha-Linolenic acid metabolism; ko01100: Metabolic pathways; ko01110: Biosynthesis of secondary metabolites	PREDICTED: phospholipase A1-IIdelta [Prunus mume]	PLA20_ARATH RecName: Full=Phospholipase A1-IIdelta; EC=3.1.1.-;	A0A6J5WQ45_PRUAR RecName: Full=Phospholipase A1 {ECO:0000256|RuleBase:RU367093}; EC=3.1.1.- {ECO:0000256|RuleBase:RU367093};	Predicted lipase	GO:0005737,cytoplasm; GO:0005829,cytosol; GO:0008970,phospholipase A1 activity; GO:0071493,cellular response to UV-B; GO:0016042,lipid catabolic process; GO:0009650,UV protection; GO:0003674,molecular_function; GO:0003824,catalytic activity; GO:0004620,phospholipase activity; GO:0016298,lipase activity; GO:0016787,hydrolase activity; GO:0016788,hydrolase activity, acting on ester bonds; GO:005268…	PF01764.28:Lipase (class 3)	--	--	--
PmuVar_Chr4_2964	25.7561	22.6097	24.2768	77.863	71.7391	71.4615	547	546	578	1936	1490	1496	1.90959	2.77758e-92	1.23033e-90	up	Chr4	23210019	23211766	-	PmuVar_Chr4_2964	--	--	--	PREDICTED: GDSL esterase/lipase At2g04570-like [Prunus mume]	GDL34_ARATH RecName: Full=GDSL esterase/lipase At2g04570; EC=3.1.1.-; AltName: Full=Extracellular lipase At2g04570; Flags: Precursor;	A0A6J5WX24_PRUAR SubName: Full=Uncharacterized protein {ECO:0000313|EMBL:CAB4304577.1};	--	GO:0005576,extracellular region; GO:0016297,acyl-[acyl-carrier-protein] hydrolase activity; GO:0016042,lipid catabolic process; GO:0003674,molecular_function; GO:0003824,catalytic activity; GO:0004312,fatty acid synthase activity; GO:0016740,transferase activity; GO:0016746,transferase activity, transferring acyl groups; GO:0016747,transferase activity, transferring acyl groups other than amino-a…	PF00657.25:GDSL-like Lipase/Acylhydrolase	--	--	--
PmuVar_Chr6_2570	65.2194	65.9912	62.5551	240.947	221.758	204.184	372	428	400	1609	1237	1148	2.08581	2.79289e-92	1.23358e-90	up	Chr6	19332330	19332611	+	PmuVar_Chr6_2570	--	K14488 SAUR family protein | (RefSeq) auxin-induced protein 15A-like (A)	ko04075: Plant hormone signal transduction	PREDICTED: auxin-induced protein 15A-like [Prunus mume]	AX10A_SOYBN RecName: Full=Auxin-induced protein X10A;	A0A6P5RAU0_PRUAV SubName: Full=auxin-induced protein 15A-like {ECO:0000313|RefSeq:XP_021802040.1};	--	GO:0009734,auxin-activated signaling pathway; GO:0007154,cell communication; GO:0007165,signal transduction; GO:0008150,biological_process; GO:0009719,response to endogenous stimulus; GO:0009725,response to hormone; GO:0009733,response to auxin; GO:0009755,hormone-mediated signaling pathway; GO:0009987,cellular process; GO:0010033,response to organic substance; GO:0023052,signaling; GO:0032870,ce…	PF02519.17:Auxin responsive protein	--	--	--
PmuVar_Chr7_1500	1.4982	1.1476	1.0346	21.8371	19.6189	19.9058	31	27	24	529	397	406	4.37173	3.45135e-92	1.52007e-90	up	Chr7	10357338	10359000	-	PmuVar_Chr7_1500	--	--	--	unnamed protein product [Prunus armeniaca]	UGPI7_ARATH RecName: Full=Uncharacterized GPI-anchored protein At4g28100; Flags: Precursor;	A0A6J5XL33_PRUAR RecName: Full=SPARK domain-containing protein {ECO:0000259|Pfam:PF19160};	--	GO:0031225,anchored component of membrane; GO:0046658,anchored component of plasma membrane; GO:0005886,plasma membrane; GO:0005575,cellular_component; GO:0016020,membrane; GO:0031224,intrinsic component of membrane; GO:0110165,cellular anatomical entity; GO:0031226,intrinsic component of plasma membrane; GO:0071944,cell periphery	PF19160.3:SPARK	--	--	--
PmuVar_Chr3_1772	246.204	251.156	225.757	522.262	507.003	542.714	6902	8006	7095	17141	13900	14997	1.42243	6.06938e-92	2.66553e-90	up	Chr3	12449025	12450410	-	PmuVar_Chr3_1772	--	--	--	PREDICTED: epidermis-specific secreted glycoprotein EP1-like [Prunus mume]	EP1L2_ARATH RecName: Full=EP1-like glycoprotein 2 {ECO:0000305}; AltName: Full=Curculin-like (Mannose-binding) lectin family protein {ECO:0000303|PubMed:23738689}; Flags: Precursor;	A0A5E4GFP8_PRUDU SubName: Full=PREDICTED: epidermis-specific secreted {ECO:0000313|EMBL:VVA38667.1};	--	GO:0048046,apoplast; GO:0005794,Golgi apparatus; GO:0005739,mitochondrion; GO:0009505,plant-type cell wall; GO:0005886,plasma membrane; GO:0009506,plasmodesma; GO:0099503,secretory vesicle; GO:0030246,carbohydrate binding; GO:0003674,molecular_function; GO:0005488,binding; GO:0005575,cellular_component; GO:0005576,extracellular region; GO:0110165,cellular anatomical entity; GO:0005622,intracellul…	PF01453.27:D-mannose binding lectin	--	--	--
PmuVar_Chr2_2442	84.3654	81.5854	81.8747	226.249	217.618	202.952	773	850	841	2427	1950	1833	1.68656	6.57451e-92	2.87919e-90	up	Chr2	17216064	17232132	-	PmuVar_Chr2_2442	--	--	--	MLP-like protein 328 [Prunus avium]	ML328_ARATH RecName: Full=MLP-like protein 328;	A0A6P5S101_PRUAV SubName: Full=MLP-like protein 328 {ECO:0000313|RefSeq:XP_021807618.1};	--	GO:0005829,cytosol; GO:0005739,mitochondrion; GO:0005507,copper ion binding; GO:0006952,defense response; GO:0080184,response to phenylpropanoid; GO:0010043,response to zinc ion; GO:0010228,vegetative to reproductive phase transition of meristem; GO:0003674,molecular_function; GO:0005488,binding; GO:0043167,ion binding; GO:0043169,cation binding; GO:0046872,metal ion binding; GO:0046914,transitio…	PF00407.22:Pathogenesis-related protein Bet v 1 family	--	--	--
PmuVar_Chr2_1196	70.6293	75.1913	62.4493	212.735	216.408	203.896	570	690	565	2010	1708	1622	1.90501	7.98383e-92	3.4865e-90	up	Chr2	9578443	9579088	-	PmuVar_Chr2_1196	--	--	--	uncharacterized protein LOC110774531 [Prunus avium]	--	A0A6P5U3R9_PRUAV SubName: Full=uncharacterized protein LOC110774531 {ECO:0000313|RefSeq:XP_021834768.1};	--	--	PF05553.14:Cotton fibre expressed protein	--	--	--
PmuVar_Chr8_1315	1094.1	1078.87	1107.66	370.001	368.292	322.88	14672	16451	16652	5809	4830	4268	-1.32676	1.07769e-91	4.69294e-90	down	Chr8	7535538	7539884	-	PmuVar_Chr8_1315	--	--	--	unnamed protein product [Prunus armeniaca]	--	A0A6J5XVW0_PRUAR SubName: Full=Uncharacterized protein {ECO:0000313|EMBL:CAB4318026.1};	--	--	--	--	--	--
PmuVar_Chr6_0527	39.0618	41.4334	35.0679	1.0208	1.1577	1.1486	621	749	625	19	18	18	-4.82223	1.9568e-91	8.49723e-90	down	Chr6	4889409	4890969	-	PmuVar_Chr6_0527	--	K15382 solute carrier family 50 (sugar transporter) | (RefSeq) bidirectional sugar transporter SWEET1 (A)	--	PREDICTED: bidirectional sugar transporter SWEET1 [Prunus mume]	SWET1_ARATH RecName: Full=Bidirectional sugar transporter SWEET1 {ECO:0000303|PubMed:21107422}; Short=AtSWEET1 {ECO:0000303|PubMed:21107422}; AltName: Full=Protein SUGARS WILL EVENTUALLY BE EXPORTED TRANSPORTERS 1 {ECO:0000303|PubMed:21107422};	A0A6J5VLY3_PRUAR RecName: Full=Bidirectional sugar transporter SWEET {ECO:0000256|RuleBase:RU910715};	Multitransmembrane protein	GO:0005783,endoplasmic reticulum; GO:0005789,endoplasmic reticulum membrane; GO:0016021,integral component of membrane; GO:0005887,integral component of plasma membrane; GO:0005886,plasma membrane; GO:0051119,sugar transmembrane transporter activity; GO:0008643,carbohydrate transport; GO:0051260,protein homooligomerization; GO:0003674,molecular_function; GO:0005215,transporter activity; GO:000850…	PF03083.19:Sugar efflux transporter for intercellular exchange	--	--	--
PmuVar_Chr7_0371	127.641	130.197	131.604	285.078	267.688	295.696	2765	3207	3196	7230	5671	6314	1.42651	2.56081e-91	1.1089e-89	up	Chr7	3091563	3094979	-	PmuVar_Chr7_0371	--	K14684 solute carrier family 25 (mitochondrial phosphate transporter), member 23/24/25/41 | (RefSeq) mitochondrial adenine nucleotide transporter ADNT1 (A)	--	PREDICTED: mitochondrial adenine nucleotide transporter ADNT1 [Prunus mume]	ADNT1_ARATH RecName: Full=Mitochondrial adenine nucleotide transporter ADNT1; AltName: Full=Adenine nucleotide transporter 1;	M5W9U7_PRUPE SubName: Full=Uncharacterized protein {ECO:0000313|EMBL:EMJ10494.1};	Mitochondrial solute carrier protein	GO:0016021,integral component of membrane; GO:0005743,mitochondrial inner membrane; GO:0015297,antiporter activity; GO:0003674,molecular_function; GO:0005215,transporter activity; GO:0015291,secondary active transmembrane transporter activity; GO:0022804,active transmembrane transporter activity; GO:0022857,transmembrane transporter activity; GO:0005575,cellular_component; GO:0016020,membrane; GO…	PF00153.30:Mitochondrial carrier protein	--	--	--
PmuVar_Chr1_2108	2.7794	2.4587	3.7334	15.5149	19.3758	21.1143	170	171	256	1111	1159	1273	2.94409	4.56051e-91	1.9693e-89	up	Chr1	17596102	17601718	+	PmuVar_Chr1_2108	--	K10406 kinesin family member C2/C3 | (RefSeq) kinesin-4 (A)	--	PREDICTED: kinesin [Prunus dulcis]	KN14G_ARATH RecName: Full=Kinesin-like protein KIN-14G {ECO:0000305}; AltName: Full=Kinesin-like protein KatD {ECO:0000303|PubMed:10196470, ECO:0000303|PubMed:8492804};	A0A5E4FG26_PRUDU SubName: Full=PREDICTED: kinesin {ECO:0000313|EMBL:VVA26340.1};	Kinesin (KAR3 subfamily)	GO:0005737,cytoplasm; GO:0005874,microtubule; GO:0015630,microtubule cytoskeleton; GO:0005524,ATP binding; GO:0016887,ATPase activity; GO:0008017,microtubule binding; GO:0003777,microtubule motor activity; GO:0007018,microtubule-based movement; GO:0007017,microtubule-based process; GO:0000166,nucleotide binding; GO:0003674,molecular_function; GO:0005488,binding; GO:0017076,purine nucleotide bindi…	PF00225.26:Kinesin motor domain	--	--	--
novel.308	6.9167	8.9776	9.2055	1.6866	1.5798	1.3282	4459	6581	6653	1273	996	844	-2.14685	5.2323e-91	2.25309e-89	down	Chr2	13703104	13742756	-	--	--	--	--	hypothetical protein L3X38_011970 [Prunus dulcis]	--	A0A251R9Q5_PRUPE SubName: Full=Uncharacterized protein {ECO:0000313|EMBL:ONI32783.1};	--	--	--	--	--	--
PmuVar_Chr3_0796	41.1385	32.9643	33.1589	142.194	118.847	139.597	664	605	600	2687	1876	2221	2.20637	8.45268e-91	3.62972e-89	up	Chr3	4791891	4792688	+	PmuVar_Chr3_0796	--	K08912 light-harvesting complex II chlorophyll a/b binding protein 1 | (RefSeq) chlorophyll a-b binding protein of LHCII type 1-like (A)	ko00196: Photosynthesis - antenna proteins; ko01100: Metabolic pathways	chlorophyll a-b binding protein of LHCII type 1 [Prunus persica]	CB22_TOBAC RecName: Full=Chlorophyll a-b binding protein 21, chloroplastic; AltName: Full=LHCII type I CAB-21; Short=LHCP; Flags: Precursor;	M5WUQ0_PRUPE RecName: Full=Chlorophyll a-b binding protein, chloroplastic {ECO:0000256|RuleBase:RU363080};	--	GO:0009535,chloroplast thylakoid membrane; GO:0016021,integral component of membrane; GO:0009522,photosystem I; GO:0009523,photosystem II; GO:0016168,chlorophyll binding; GO:0046872,metal ion binding; GO:0009768,photosynthesis, light harvesting in photosystem I; GO:0009416,response to light stimulus; GO:0003674,molecular_function; GO:0005488,binding; GO:0046906,tetrapyrrole binding; GO:0097159,or…	PF00504.24:Chlorophyll A-B binding protein	--	--	--
PmuVar_Chr3_0652	13.0628	14.0159	16.8656	47.1671	53.2977	54.7901	409	499	592	1729	1632	1691	2.12192	2.1763e-90	9.3195e-89	up	Chr3	3773897	3775636	+	PmuVar_Chr3_0652	--	K07198 5'-AMP-activated protein kinase, catalytic alpha subunit [EC:2.7.11.11] | (RefSeq) CBL-interacting protein kinase 5 (A)	--	PREDICTED: CBL-interacting protein kinase 5 [Prunus mume]	CIPK5_ORYSJ RecName: Full=CBL-interacting protein kinase 5; EC=2.7.11.1; AltName: Full=OsCIPK05;	M5X0N5_PRUPE RecName: Full=Non-specific serine/threonine protein kinase {ECO:0000256|ARBA:ARBA00012513}; EC=2.7.11.1 {ECO:0000256|ARBA:ARBA00012513};	Serine/threonine protein kinase	GO:0005524,ATP binding; GO:0106310,protein serine kinase activity; GO:0004674,protein serine/threonine kinase activity; GO:0006468,protein phosphorylation; GO:0007165,signal transduction; GO:0000166,nucleotide binding; GO:0003674,molecular_function; GO:0005488,binding; GO:0017076,purine nucleotide binding; GO:0030554,adenyl nucleotide binding; GO:0032553,ribonucleotide binding; GO:0032555,purine …	PF00069.28:Protein kinase domain	--	--	--
PmuVar_Chr2_1064	1.9678	1.471	1.2726	21.2198	24.5478	19.6635	40	34	29	505	488	394	4.10486	2.40944e-90	1.02894e-88	up	Chr2	8693596	8694906	-	PmuVar_Chr2_1064	--	--	--	PREDICTED: BURP domain protein RD22-like isoform X2 [Prunus mume]	RD22_ARATH RecName: Full=BURP domain protein RD22 {ECO:0000303|PubMed:9790599}; AltName: Full=Dehydration-responsive protein RD22 {ECO:0000303|PubMed:8479424}; Flags: Precursor;	M5Y346_PRUPE RecName: Full=BURP domain-containing protein {ECO:0000259|PROSITE:PS51277};	--	GO:0005768,endosome; GO:0005794,Golgi apparatus; GO:0005802,trans-Golgi network; GO:0003729,mRNA binding; GO:0009651,response to salt stress; GO:0003674,molecular_function; GO:0003676,nucleic acid binding; GO:0003723,RNA binding; GO:0005488,binding; GO:0097159,organic cyclic compound binding; GO:1901363,heterocyclic compound binding; GO:0006950,response to stress; GO:0006970,response to osmotic s…	PF03181.18:BURP domain	--	--	--
PmuVar_Chr2_4984	540.076	528.776	513.488	155.826	165.011	176.386	17336	19300	18478	5856	5180	5581	-1.36823	3.56834e-90	1.51964e-88	down	Chr2	36467208	36469331	+	PmuVar_Chr2_4984	--	K01177 beta-amylase [EC:3.2.1.2] | (RefSeq) beta-amylase 1, chloroplastic (A)	ko00500: Starch and sucrose metabolism; ko01100: Metabolic pathways; ko01110: Biosynthesis of secondary metabolites	PREDICTED: inactive beta-amylase 9 [Prunus mume]	BAM9_ARATH RecName: Full=Inactive beta-amylase 9; AltName: Full=1,4-alpha-D-glucan maltohydrolase; AltName: Full=Inactive beta-amylase 3;	A0A6J5TII6_PRUAR RecName: Full=Beta-amylase {ECO:0000256|RuleBase:RU000509}; EC=3.2.1.2 {ECO:0000256|RuleBase:RU000509};	--	GO:0005737,cytoplasm; GO:0016161,beta-amylase activity; GO:0000272,polysaccharide catabolic process; GO:0003674,molecular_function; GO:0003824,catalytic activity; GO:0004553,hydrolase activity, hydrolyzing O-glycosyl compounds; GO:0016160,amylase activity; GO:0016787,hydrolase activity; GO:0016798,hydrolase activity, acting on glycosyl bonds; GO:0005975,carbohydrate metabolic process; GO:0005976,…	PF01373.20:Glycosyl hydrolase family 14	--	--	--
PmuVar_Chr4_1206	97.463	102.895	93.9649	211.228	210.466	195.576	3093	3713	3343	7848	6532	6118	1.36978	3.60371e-90	1.53049e-88	up	Chr4	11372184	11373847	+	PmuVar_Chr4_1206	--	K23136 fraxetin 5-hydroxylase [EC:1.14.14.164] | (RefSeq) cytochrome P450 82C4-like (A)	ko00999: Biosynthesis of various plant secondary metabolites; ko01110: Biosynthesis of secondary metabolites	PREDICTED: cytochrome P450 CYP82D47-like [Prunus mume]	C82A3_SOYBN RecName: Full=Cytochrome P450 82A3; EC=1.14.-.-; AltName: Full=Cytochrome P450 CP6;	M5WY14_PRUPE SubName: Full=Uncharacterized protein {ECO:0000313|EMBL:EMJ18687.1};	Cytochrome P450 CYP2 subfamily	GO:0016020,membrane; GO:0020037,heme binding; GO:0005506,iron ion binding; GO:0004497,monooxygenase activity; GO:0016705,oxidoreductase activity, acting on paired donors, with incorporation or reduction of molecular oxygen; GO:0098542,defense response to other organism; GO:0003674,molecular_function; GO:0005488,binding; GO:0046906,tetrapyrrole binding; GO:0097159,organic cyclic compound binding; …	PF00067.25:Cytochrome P450	--	--	--
PmuVar_Chr1_3811	50.7514	49.574	47.5677	114.851	120.067	110.953	1084	1204	1139	2872	2508	2336	1.52718	4.05188e-90	1.71611e-88	up	Chr1	29297914	29299939	-	PmuVar_Chr1_3811	--	--	--	PREDICTED: GDSL esterase/lipase At5g22810 [Prunus mume]	GDL78_ARATH RecName: Full=GDSL esterase/lipase At5g22810; EC=3.1.1.-; AltName: Full=Extracellular lipase At5g22810; Flags: Precursor;	A0A6J5V1S9_PRUAR SubName: Full=Uncharacterized protein {ECO:0000313|EMBL:CAB4282899.1};	--	GO:0005576,extracellular region; GO:0016788,hydrolase activity, acting on ester bonds; GO:0016042,lipid catabolic process; GO:0003674,molecular_function; GO:0003824,catalytic activity; GO:0016787,hydrolase activity; GO:0006629,lipid metabolic process; GO:0008150,biological_process; GO:0008152,metabolic process; GO:0009056,catabolic process; GO:0044238,primary metabolic process; GO:0071704,organic…	PF00657.25:GDSL-like Lipase/Acylhydrolase	--	--	--
PmuVar_Chr8_1008	41.8932	38.6059	37.185	94.4056	102.405	109.137	1421	1489	1414	3749	3397	3649	1.68041	4.40702e-90	1.86142e-88	up	Chr8	5793883	5796457	-	PmuVar_Chr8_1008	--	K00021 hydroxymethylglutaryl-CoA reductase (NADPH) [EC:1.1.1.34] | (RefSeq) 3-hydroxy-3-methylglutaryl-coenzyme A reductase 1-like (A)	ko00900: Terpenoid backbone biosynthesis; ko01100: Metabolic pathways; ko01110: Biosynthesis of secondary metabolites	unnamed protein product [Prunus armeniaca]	HMDH1_HEVBR RecName: Full=3-hydroxy-3-methylglutaryl-coenzyme A reductase 1; Short=HMG-CoA reductase 1; EC=1.1.1.34;	A0A6J5VJI0_PRUAR RecName: Full=3-hydroxy-3-methylglutaryl coenzyme A reductase {ECO:0000256|RuleBase:RU361219}; Short=HMG-CoA reductase {ECO:0000256|RuleBase:RU361219}; EC=1.1.1.34 {ECO:0000256|RuleBase:RU361219};	3-hydroxy-3-methylglutaryl-CoA (HMG-CoA) reductase	GO:0005789,endoplasmic reticulum membrane; GO:0016021,integral component of membrane; GO:0031966,mitochondrial membrane; GO:0042170,plastid membrane; GO:0004420,hydroxymethylglutaryl-CoA reductase (NADPH) activity; GO:0015936,coenzyme A metabolic process; GO:0008299,isoprenoid biosynthetic process; GO:0003674,molecular_function; GO:0003824,catalytic activity; GO:0016491,oxidoreductase activity; G…	PF00368.21:Hydroxymethylglutaryl-coenzyme A reductase	--	--	--
PmuVar_Chr7_0303	1.7418	1.7675	2.0318	28.8968	26.0992	26.9814	26	30	34	505	381	397	4.18889	8.09603e-90	3.41026e-88	up	Chr7	2684600	2685984	-	PmuVar_Chr7_0303	--	--	--	unnamed protein product [Prunus armeniaca]	--	A0A6J5UY06_PRUAR SubName: Full=Uncharacterized protein {ECO:0000313|EMBL:CAB4280025.1};	--	GO:0016021,integral component of membrane; GO:0005575,cellular_component; GO:0016020,membrane; GO:0031224,intrinsic component of membrane; GO:0110165,cellular anatomical entity	--	--	--	--
PmuVar_Chr3_2773	1.5209	2.3023	2.4686	15.1626	15.8317	18.2365	61	105	111	712	621	721	3.26404	8.37436e-90	3.51791e-88	up	Chr3	21506579	21512617	+	PmuVar_Chr3_2773	--	K05681 ATP-binding cassette, subfamily G (WHITE), member 2 | (RefSeq) ABC transporter G family member 22 isoform X1 (A)	ko02010: ABC transporters	PREDICTED: ABC transporter G family member 15-like [Prunus mume]	AB15G_ARATH RecName: Full=ABC transporter G family member 15; Short=ABC transporter ABCG.15; Short=AtABCG15; AltName: Full=White-brown complex homolog protein 15; Short=AtWBC15; AltName: Full=White-brown complex homolog protein 22; Short=AtWBC22;	A0A5E4GDT8_PRUDU SubName: Full=PREDICTED: ABC {ECO:0000313|EMBL:VVA37772.1};	Transporter, ABC superfamily (Breast cancer resistance protein)	GO:0016021,integral component of membrane; GO:0140359,ABC-type transporter activity; GO:0005524,ATP binding; GO:0003674,molecular_function; GO:0003824,catalytic activity; GO:0005215,transporter activity; GO:0015399,primary active transmembrane transporter activity; GO:0016462,pyrophosphatase activity; GO:0016787,hydrolase activity; GO:0016817,hydrolase activity, acting on acid anhydrides; GO:0016…	PF01061.27:ABC-2 type transporter	--	--	--
PmuVar_Chr8_1231	0.2699	0.2373	0.4298	8.6435	7.4698	9.6989	14	14	25	525	379	496	5.08486	1.18228e-89	4.95308e-88	up	Chr8	7132263	7137710	-	PmuVar_Chr8_1231	--	K12309 beta-galactosidase [EC:3.2.1.23] | (RefSeq) beta-galactosidase 17 isoform X1 (A)	ko00052: Galactose metabolism; ko00511: Other glycan degradation; ko00531: Glycosaminoglycan degradation; ko00600: Sphingolipid metabolism; ko00604: Glycosphingolipid biosynthesis - ganglio series; ko01100: Metabolic pathways	PREDICTED: beta-galactosidase 3 [Prunus mume]	BGAL3_ARATH RecName: Full=Beta-galactosidase 3; Short=Lactase 3; EC=3.2.1.23; Flags: Precursor;	A0A6J5XW41_PRUAR RecName: Full=Beta-galactosidase {ECO:0000256|ARBA:ARBA00012756, ECO:0000256|RuleBase:RU000675}; EC=3.2.1.23 {ECO:0000256|ARBA:ARBA00012756, ECO:0000256|RuleBase:RU000675};	Beta-galactosidase	GO:0048046,apoplast; GO:0009505,plant-type cell wall; GO:0005886,plasma membrane; GO:0005773,vacuole; GO:0004565,beta-galactosidase activity; GO:0030246,carbohydrate binding; GO:0005975,carbohydrate metabolic process; GO:0003674,molecular_function; GO:0003824,catalytic activity; GO:0004553,hydrolase activity, hydrolyzing O-glycosyl compounds; GO:0015925,galactosidase activity; GO:0016787,hydrolas…	PF01301.22:Glycosyl hydrolases family 35	--	--	--
PmuVar_Chr8_0525	48.4897	50.5597	51.0841	112.937	107.493	105.876	1530	1814	1807	4172	3317	3293	1.42231	2.71779e-89	1.13552e-87	up	Chr8	2929669	2931228	-	PmuVar_Chr8_0525	--	K15397 3-ketoacyl-CoA synthase [EC:2.3.1.199] | (RefSeq) 3-ketoacyl-CoA synthase 11 (A)	ko00062: Fatty acid elongation; ko01100: Metabolic pathways; ko01110: Biosynthesis of secondary metabolites; ko04626: Plant-pathogen interaction	3-ketoacyl-CoA synthase 11 [Prunus persica]	KCS11_ARATH RecName: Full=3-ketoacyl-CoA synthase 11 {ECO:0000303|PubMed:18465198}; Short=KCS-11 {ECO:0000303|PubMed:18465198}; EC=2.3.1.199 {ECO:0000269|PubMed:16765910}; AltName: Full=Very long-chain fatty acid condensing enzyme 11 {ECO:0000303|PubMed:18465198}; Short=VLCFA condensing enzyme 11 {ECO:0000303|PubMed:18465198};	M5VY75_PRUPE RecName: Full=3-ketoacyl-CoA synthase {ECO:0000256|PIRNR:PIRNR036417}; EC=2.3.1.- {ECO:0000256|PIRNR:PIRNR036417};	--	GO:0016021,integral component of membrane; GO:0102756,very-long-chain 3-ketoacyl-CoA synthase activity; GO:0006633,fatty acid biosynthetic process; GO:0009409,response to cold; GO:0009416,response to light stimulus; GO:0003674,molecular_function; GO:0003824,catalytic activity; GO:0016740,transferase activity; GO:0016746,transferase activity, transferring acyl groups; GO:0016747,transferase activi…	PF08392.15:FAE1/Type III polyketide synthase-like protein	--	--	--
PmuVar_Chr3_1759	0.64	1.0788	0.7136	23.8708	25.8498	19.4784	12	23	15	524	474	360	5.11984	3.79321e-89	1.58057e-87	up	Chr3	12375380	12376306	-	PmuVar_Chr3_1759	--	--	--	PREDICTED: chitinase 2-like [Prunus mume]	CHIT1_TULSB RecName: Full=Chitinase 1; EC=3.2.1.14; AltName: Full=Tulip bulb chitinase-1; Short=TBC-1; Flags: Precursor;	A0A6J5UN43_PRUAR RecName: Full=GH18 domain-containing protein {ECO:0000259|PROSITE:PS51910};	--	GO:0008061,chitin binding; GO:0004568,chitinase activity; GO:0006032,chitin catabolic process; GO:0000272,polysaccharide catabolic process; GO:0003674,molecular_function; GO:0005488,binding; GO:0097367,carbohydrate derivative binding; GO:0003824,catalytic activity; GO:0004553,hydrolase activity, hydrolyzing O-glycosyl compounds; GO:0016787,hydrolase activity; GO:0016798,hydrolase activity, acting…	PF00704.31:Glycosyl hydrolases family 18	--	--	--
PmuVar_Chr6_0785	2.049	2.6773	2.1411	17.8519	17.1807	23.1036	70	104	82	714	574	778	3.38189	4.17468e-89	1.73485e-87	up	Chr6	7338454	7341860	-	PmuVar_Chr6_0785	--	K01051 pectinesterase [EC:3.1.1.11] | (RefSeq) pectinesterase-like (A)	ko00040: Pentose and glucuronate interconversions; ko01100: Metabolic pathways	PREDICTED: pectinesterase-like [Prunus mume]	PME40_ARATH RecName: Full=Probable pectinesterase/pectinesterase inhibitor 40; Includes: RecName: Full=Pectinesterase inhibitor 40; AltName: Full=Pectin methylesterase inhibitor 40; Includes: RecName: Full=Pectinesterase 40; Short=PE 40; EC=3.1.1.11; AltName: Full=Pectin methylesterase 40; Short=AtPME40; Flags: Precursor;	A0A6J5VWI9_PRUAR RecName: Full=Pectinesterase {ECO:0000256|RuleBase:RU000589}; EC=3.1.1.11 {ECO:0000256|RuleBase:RU000589};	--	GO:0005576,extracellular region; GO:0045330,aspartyl esterase activity; GO:0030599,pectinesterase activity; GO:0046910,pectinesterase inhibitor activity; GO:0042545,cell wall modification; GO:0045490,pectin catabolic process; GO:0003674,molecular_function; GO:0003824,catalytic activity; GO:0016787,hydrolase activity; GO:0016788,hydrolase activity, acting on ester bonds; GO:0052689,carboxylic este…	PF01095.22:Pectinesterase	--	--	--
PmuVar_Chr5_3336	170.701	167.848	175.883	311.982	342.319	347.037	7292	8153	8423	15603	14301	14613	1.26278	4.51156e-89	1.86982e-87	up	Chr5	29039134	29041923	+	PmuVar_Chr5_3336	--	K04079 molecular chaperone HtpG | (RefSeq) heat shock protein 83 (A)	ko04141: Protein processing in endoplasmic reticulum; ko04626: Plant-pathogen interaction	PREDICTED: heat shock protein 83 [Prunus mume]	HSP83_IPONI RecName: Full=Heat shock protein 83;	A0A5E4E5Q7_PRUDU SubName: Full=PREDICTED: heat shock {ECO:0000313|EMBL:VVA11177.1};	Molecular chaperone (HSP90 family)	GO:0005737,cytoplasm; GO:0005524,ATP binding; GO:0016887,ATPase activity; GO:0051082,unfolded protein binding; GO:0006457,protein folding; GO:0000166,nucleotide binding; GO:0003674,molecular_function; GO:0005488,binding; GO:0017076,purine nucleotide binding; GO:0030554,adenyl nucleotide binding; GO:0032553,ribonucleotide binding; GO:0032555,purine ribonucleotide binding; GO:0032559,adenyl ribonuc…	PF00183.21:Hsp90 protein	--	--	--
PmuVar_Chr8_1621	2.6159	3.1057	3.3834	55.5239	48.8158	54.5356	20	27	29	497	365	411	4.4238	6.87368e-89	2.84118e-87	up	Chr8	9601768	9602145	+	PmuVar_Chr8_1621	--	K14488 SAUR family protein | (RefSeq) auxin-responsive protein SAUR71-like (A)	ko04075: Plant hormone signal transduction	unnamed protein product [Prunus armeniaca]	SAU72_ARATH RecName: Full=Auxin-responsive protein SAUR72 {ECO:0000305}; AltName: Full=Protein SMALL AUXIN UP RNA 72 {ECO:0000303|PubMed:12036261};	A0A6J5XVJ1_PRUAR SubName: Full=Uncharacterized protein {ECO:0000313|EMBL:CAB4317659.1};	--	GO:0005737,cytoplasm; GO:0009734,auxin-activated signaling pathway; GO:0040008,regulation of growth; GO:0007154,cell communication; GO:0007165,signal transduction; GO:0008150,biological_process; GO:0009719,response to endogenous stimulus; GO:0009725,response to hormone; GO:0009733,response to auxin; GO:0009755,hormone-mediated signaling pathway; GO:0009987,cellular process; GO:0010033,response to…	PF02519.17:Auxin responsive protein	--	--	--
PmuVar_Chr6_0510	27.9457	28.0137	25.3478	63.9877	68.2966	70.6494	1187	1353	1207	3182	2837	2958	1.62111	7.21545e-89	2.9745e-87	up	Chr6	4712697	4717635	+	PmuVar_Chr6_0510	--	--	--	PREDICTED: uncharacterized protein LOC103336452 isoform X2 [Prunus mume]	RNHX1_ARATH RecName: Full=Putative ribonuclease H protein At1g65750; EC=3.1.26.4;	A0A6J5Y034_PRUAR SubName: Full=Uncharacterized protein {ECO:0000313|EMBL:CAB4319480.1};	FOG: Reverse transcriptase	GO:0046872,metal ion binding; GO:0003676,nucleic acid binding; GO:0004523,RNA-DNA hybrid ribonuclease activity; GO:0003674,molecular_function; GO:0005488,binding; GO:0043167,ion binding; GO:0043169,cation binding; GO:0097159,organic cyclic compound binding; GO:1901363,heterocyclic compound binding; GO:0003824,catalytic activity; GO:0004518,nuclease activity; GO:0004519,endonuclease activity; GO:0…	PF07893.16:Protein of unknown function (DUF1668)	--	--	--
PmuVar_Chr2_1633	675.378	639.159	682.377	1379.23	1345.01	1211.6	13114	14112	14854	31354	25541	23190	1.28061	8.49327e-89	3.49195e-87	up	Chr2	12333211	12336138	+	PmuVar_Chr2_1633	--	K01850 chorismate mutase [EC:5.4.99.5] | (RefSeq) chorismate mutase 2 (A)	ko00400: Phenylalanine, tyrosine and tryptophan biosynthesis; ko01100: Metabolic pathways; ko01110: Biosynthesis of secondary metabolites; ko01230: Biosynthesis of amino acids	PREDICTED: chorismate mutase 2 [Prunus mume]	CM2_ARATH RecName: Full=Chorismate mutase 2 {ECO:0000303|Ref.2}; Short=AtCM2 {ECO:0000303|Ref.2}; EC=5.4.99.5 {ECO:0000269|PubMed:10564818, ECO:0000269|PubMed:25160622, ECO:0000269|PubMed:8953244}; AltName: Full=CM-2 {ECO:0000303|Ref.2};	A0A6J5W4T1_PRUAR RecName: Full=Chorismate mutase {ECO:0000256|ARBA:ARBA00012404, ECO:0000256|PIRNR:PIRNR017318}; EC=5.4.99.5 {ECO:0000256|ARBA:ARBA00012404, ECO:0000256|PIRNR:PIRNR017318};	Chorismate mutase	GO:0005737,cytoplasm; GO:0005829,cytosol; GO:0004106,chorismate mutase activity; GO:0042803,protein homodimerization activity; GO:0009073,aromatic amino acid family biosynthetic process; GO:0008652,cellular amino acid biosynthetic process; GO:0046417,chorismate metabolic process; GO:1901747,prephenate(2-) biosynthetic process; GO:0003674,molecular_function; GO:0003824,catalytic activity; GO:00168…	--	--	--	--
PmuVar_Chr2_4602	9.137	8.7996	8.8753	31.1933	38.3743	42.1385	326	357	355	1303	1339	1482	2.36015	1.023e-88	4.19483e-87	up	Chr2	33744807	33748365	-	PmuVar_Chr2_4602	--	--	--	PREDICTED: protein CHUP1, chloroplastic [Prunus mume]	CHUP1_ARATH RecName: Full=Protein CHUP1, chloroplastic; AltName: Full=Protein CHLOROPLAST UNUSUAL POSITIONING 1;	A0A6J5TG82_PRUAR SubName: Full=Uncharacterized protein {ECO:0000313|EMBL:CAB4262422.1};	--	GO:0009507,chloroplast; GO:0009707,chloroplast outer membrane; GO:0005829,cytosol; GO:0009658,chloroplast organization; GO:0009902,chloroplast relocation; GO:0006996,organelle organization; GO:0008150,biological_process; GO:0009657,plastid organization; GO:0009987,cellular process; GO:0016043,cellular component organization; GO:0071840,cellular component organization or biogenesis; GO:0019750,chl…	--	--	--	--
PmuVar_Chr7_1416	386.317	379.117	353.168	111.415	101.45	99.0952	5790	6461	5934	1955	1487	1464	-1.53955	1.78169e-88	7.28655e-87	down	Chr7	9892750	9893490	-	PmuVar_Chr7_1416	--	--	--	PREDICTED: uncharacterized protein LOC103338800 [Prunus mume]	--	A0A6J5XCW8_PRUAR SubName: Full=Uncharacterized protein {ECO:0000313|EMBL:CAB4311690.1};	U4/U6-associated splicing factor PRP4	--	--	--	--	--
PmuVar_Chr7_0178	1.594	2.035	1.4219	12.8028	16.7726	14.0324	62	90	62	583	638	538	3.40596	2.0568e-88	8.38946e-87	up	Chr7	1679858	1684177	+	PmuVar_Chr7_0178	--	K05765 cofilin | (RefSeq) actin-depolymerizing factor 10 isoform X1 (A)	--	KDEL motif-containing protein 1-like [Pyrus ussuriensis x Pyrus communis]	ADF7_ARATH RecName: Full=Actin-depolymerizing factor 7; Short=ADF-7; Short=AtADF7;	A0A5N5I500_9ROSA SubName: Full=KDEL motif-containing protein 1-like {ECO:0000313|EMBL:KAB2632700.1};	Endoplasmic reticulum protein EP58, contains filamin rod domain and KDEL motif	GO:0015629,actin cytoskeleton; GO:0005884,actin filament; GO:0005737,cytoplasm; GO:0051015,actin filament binding; GO:0030042,actin filament depolymerization; GO:0003674,molecular_function; GO:0003779,actin binding; GO:0005488,binding; GO:0005515,protein binding; GO:0008092,cytoskeletal protein binding; GO:0044877,protein-containing complex binding; GO:0006996,organelle organization; GO:0007010,c…	PF05686.15:Glycosyl transferase family 90	--	--	--
PmuVar_Chr7_2214	79.3334	75.1911	72.8585	12.4068	17.4665	14.1562	2638	2843	2716	483	568	464	-2.072	3.89617e-88	1.58502e-86	down	Chr7	16408517	16410919	+	PmuVar_Chr7_2214	--	K01177 beta-amylase [EC:3.2.1.2] | (RefSeq) beta-amylase 3, chloroplastic (A)	ko00500: Starch and sucrose metabolism; ko01100: Metabolic pathways; ko01110: Biosynthesis of secondary metabolites	beta-amylase 3, chloroplastic [Prunus dulcis]	BAM3_ARATH RecName: Full=Beta-amylase 3, chloroplastic; EC=3.2.1.2; AltName: Full=1,4-alpha-D-glucan maltohydrolase; AltName: Full=Beta-amylase 8; AltName: Full=Chloroplast beta-amylase; Short=CT-BMY; Flags: Precursor;	A0A5E4GF81_PRUDU RecName: Full=Beta-amylase {ECO:0000256|ARBA:ARBA00012594, ECO:0000256|RuleBase:RU000509}; EC=3.2.1.2 {ECO:0000256|ARBA:ARBA00012594, ECO:0000256|RuleBase:RU000509};	--	GO:0009570,chloroplast stroma; GO:0005829,cytosol; GO:0102229,amylopectin maltohydrolase activity; GO:0016161,beta-amylase activity; GO:0000024,maltose biosynthetic process; GO:0009409,response to cold; GO:0005983,starch catabolic process; GO:0003674,molecular_function; GO:0003824,catalytic activity; GO:0004553,hydrolase activity, hydrolyzing O-glycosyl compounds; GO:0016787,hydrolase activity; G…	PF01373.20:Glycosyl hydrolase family 14	--	--	--
PmuVar_Chr1_2163	286.422	289.01	279.872	635.845	568.605	587.784	4988	5723	5464	12964	9684	10090	1.36998	4.09179e-88	1.66023e-86	up	Chr1	17850542	17851402	-	PmuVar_Chr1_2163	--	--	--	protein SRC2 [Prunus persica]	SRC2_SOYBN RecName: Full=Protein SRC2 {ECO:0000305}; AltName: Full=Protein SOYBEAN GENE REGULATED BY COLD 2 {ECO:0000303|Ref.1};	M5WC75_PRUPE RecName: Full=C2 domain-containing protein {ECO:0000259|PROSITE:PS50004};	--	GO:0005789,endoplasmic reticulum membrane; GO:0016021,integral component of membrane; GO:0005886,plasma membrane; GO:0032586,protein storage vacuole membrane; GO:0006952,defense response; GO:0006950,response to stress; GO:0008150,biological_process; GO:0050896,response to stimulus; GO:0005575,cellular_component; GO:0005622,intracellular anatomical structure; GO:0005737,cytoplasm; GO:0005783,endop…	PF00168.33:C2 domain	--	--	--
PmuVar_Chr4_2216	4.3198	4.6056	5.3576	20.6472	24.0217	22.6921	146	177	203	817	794	756	2.53671	4.34467e-88	1.75823e-86	up	Chr4	18491629	18494305	-	PmuVar_Chr4_2216	--	K08669 HtrA serine peptidase 2 [EC:3.4.21.108] | (RefSeq) putative protease Do-like 14 (A)	--	PREDICTED: protease Do-like 9 [Prunus mume]	DEGP9_ARATH RecName: Full=Protease Do-like 9; EC=3.4.21.-;	A0A6J5UGA1_PRUAR SubName: Full=Uncharacterized protein {ECO:0000313|EMBL:CAB4275161.1};	Serine protease	GO:0005730,nucleolus; GO:0005634,nucleus; GO:0004252,serine-type endopeptidase activity; GO:0008236,serine-type peptidase activity; GO:0006508,proteolysis; GO:0003674,molecular_function; GO:0003824,catalytic activity; GO:0004175,endopeptidase activity; GO:0008233,peptidase activity; GO:0016787,hydrolase activity; GO:0017171,serine hydrolase activity; GO:0140096,catalytic activity, acting on a pro…	PF17815.4:PDZ domain	--	--	--
PmuVar_Chr2_2092	87.1839	91.9998	99.3548	21.8833	21.7907	19.9859	1841	2209	2352	541	450	416	-1.82662	4.7468e-88	1.91595e-86	down	Chr2	14957484	14958914	-	PmuVar_Chr2_2092	--	K18468 vacuolar protein sorting-associated protein 35 | (RefSeq) vacuolar protein sorting-associated protein 35B isoform X1 (A)	ko04144: Endocytosis	VPS35 homolog B [Prunus dulcis]	VP35B_ARATH RecName: Full=Vacuolar protein sorting-associated protein 35B; AltName: Full=Vesicle protein sorting 35B;	A0A4Y1QSG0_PRUDU SubName: Full=VPS35 homolog B {ECO:0000313|EMBL:BBG94802.1};	Membrane coat complex Retromer, subunit VPS35	GO:0005829,cytosol; GO:0010008,endosome membrane; GO:0005794,Golgi apparatus; GO:0005770,late endosome; GO:0030904,retromer complex; GO:0030906,retromer, cargo-selective complex; GO:0006886,intracellular protein transport; GO:0042147,retrograde transport, endosome to Golgi; GO:0006810,transport; GO:0006811,ion transport; GO:0006820,anion transport; GO:0008104,protein localization; GO:0008150,biol…	--	--	--	--
PmuVar_Chr8_0519	54.7893	46.5315	48.0989	165.213	166.297	163.523	379	366	373	1338	1125	1115	2.03195	7.94302e-88	3.19768e-86	up	Chr8	2893896	2894237	-	PmuVar_Chr8_0519	--	--	--	unnamed protein product [Prunus armeniaca]	--	A0A6J5Y5Z5_PRUAR SubName: Full=Uncharacterized protein {ECO:0000313|EMBL:CAB4318924.1};	--	--	--	--	--	--
PmuVar_Chr7_0376	39.3731	44.7537	37.1509	119.621	119.018	117.732	571	738	604	2031	1688	1683	1.85615	7.98157e-88	3.20486e-86	up	Chr7	3118257	3118973	+	PmuVar_Chr7_0376	--	--	--	PREDICTED: uncharacterized protein LOC103337667 [Prunus mume]	--	A0A6J5X9A6_PRUAR SubName: Full=Uncharacterized protein {ECO:0000313|EMBL:CAB4310526.1};	--	--	--	--	--	--
PmuVar_Chr7_1562	8.3394	10.0406	9.0328	51.642	49.1332	38.5744	168	230	204	1218	968	766	2.64558	1.40862e-87	5.64142e-86	up	Chr7	10696277	10698874	-	PmuVar_Chr7_1562	--	K14379 tartrate-resistant acid phosphatase type 5 [EC:3.1.3.2] | (RefSeq) purple acid phosphatase 3-like (A)	ko00740: Riboflavin metabolism; ko01100: Metabolic pathways	PREDICTED: purple acid phosphatase 3-like [Prunus mume]	PPA3_ARATH RecName: Full=Purple acid phosphatase 3; EC=3.1.3.2; Flags: Precursor;	A0A6J5XDS8_PRUAR RecName: Full=Purple acid phosphatase {ECO:0000256|PIRNR:PIRNR000898}; EC=3.1.3.2 {ECO:0000256|PIRNR:PIRNR000898};	Purple (tartrate-resistant) acid phosphatase	GO:0005576,extracellular region; GO:0000325,plant-type vacuole; GO:0003993,acid phosphatase activity; GO:0008199,ferric iron binding; GO:0008198,ferrous iron binding; GO:0003674,molecular_function; GO:0003824,catalytic activity; GO:0016787,hydrolase activity; GO:0016788,hydrolase activity, acting on ester bonds; GO:0016791,phosphatase activity; GO:0042578,phosphoric ester hydrolase activity; GO:0…	PF00149.31:Calcineurin-like phosphoesterase	--	--	--
PmuVar_Chr6_0383	210.429	213.025	220.334	499.908	468.272	425.513	3256	3748	3822	9056	7086	6490	1.41631	1.86807e-87	7.46214e-86	up	Chr6	3789264	3791543	-	PmuVar_Chr6_0383	--	K04711 dihydroceramidase [EC:3.5.1.-] | (RefSeq) alkaline ceramidase 3-like (A)	ko00600: Sphingolipid metabolism; ko01100: Metabolic pathways	PREDICTED: alkaline ceramidase 3-like [Prunus mume]	ACER_ARATH RecName: Full=Alkaline ceramidase {ECO:0000303|PubMed:25619405}; Short=AlkCDase {ECO:0000303|PubMed:25619405}; Short=Alkaline CDase {ECO:0000303|PubMed:25619405}; Short=AtACER {ECO:0000303|PubMed:25619405}; EC=3.5.1.- {ECO:0000305}; AltName: Full=Acyl-CoA independent ceramide synthase 1 {ECO:0000303|PubMed:23505340}; Short=AtCES1 {ECO:0000303|PubMed:23505340}; AltName: Full=Alkaline ce…	A0A6P5SHB7_PRUAV SubName: Full=alkaline ceramidase-like {ECO:0000313|RefSeq:XP_021812951.1};	Alkaline ceramidase	GO:0005783,endoplasmic reticulum; GO:0005789,endoplasmic reticulum membrane; GO:0005794,Golgi apparatus; GO:0000139,Golgi membrane; GO:0016021,integral component of membrane; GO:0005634,nucleus; GO:0016811,hydrolase activity, acting on carbon-nitrogen (but not peptide) bonds, in linear amides; GO:0046872,metal ion binding; GO:0009738,abscisic acid-activated signaling pathway; GO:0006914,autophagy…	PF05875.15:Ceramidase	--	--	--
PmuVar_Chr2_3276	3.914	4.8915	4.4101	118.594	106.164	73.5633	19	27	24	674	504	352	4.79388	3.01159e-87	1.1999e-85	up	Chr2	22873180	22873925	-	PmuVar_Chr2_3276	--	K13456 RPM1-interacting protein 4 | (RefSeq) RPM1-interacting protein 4-like (A)	ko04626: Plant-pathogen interaction	unnamed protein product [Prunus armeniaca]	NOI4_ARATH RecName: Full=Protein NOI4 {ECO:0000303|PubMed:15845764}; AltName: Full=Protein DiDi 18T-1d {ECO:0000303|PubMed:11277426};	A0A6J5VZX2_PRUAR RecName: Full=AvrRpt-cleavage domain-containing protein {ECO:0000259|Pfam:PF05627};	--	GO:0005886,plasma membrane; GO:0009624,response to nematode; GO:0008150,biological_process; GO:0009605,response to external stimulus; GO:0009607,response to biotic stimulus; GO:0043207,response to external biotic stimulus; GO:0044419,biological process involved in interspecies interaction between organisms; GO:0050896,response to stimulus; GO:0051707,response to other organism; GO:0005575,cellula…	PF05627.14:Cleavage site for pathogenic type III effector avirulence factor Avr	--	--	--
PmuVar_Chr4_2453	49.9864	55.6331	55.5756	125.464	118.972	125.859	1465	1854	1826	4305	3410	3636	1.50234	3.99791e-87	1.58878e-85	up	Chr4	19792916	19794364	-	PmuVar_Chr4_2453	--	K00012 UDPglucose 6-dehydrogenase [EC:1.1.1.22] | (RefSeq) UDP-glucose 6-dehydrogenase 1-like (A)	ko00040: Pentose and glucuronate interconversions; ko00053: Ascorbate and aldarate metabolism; ko00520: Amino sugar and nucleotide sugar metabolism; ko01100: Metabolic pathways; ko01240: Biosynthesis of cofactors; ko01250: Biosynthesis of nucleotide sugars	PREDICTED: UDP-glucose 6-dehydrogenase 1-like [Prunus mume]	UGDH1_SOYBN RecName: Full=UDP-glucose 6-dehydrogenase 1; Short=UDP-Glc dehydrogenase 1; Short=UDP-GlcDH 1; Short=UDPGDH 1; EC=1.1.1.22; AltName: Full=Gm-UGD1;	A0A6J5UFC4_PRUAR RecName: Full=UDP-glucose 6-dehydrogenase {ECO:0000256|ARBA:ARBA00012954, ECO:0000256|PIRNR:PIRNR000124}; EC=1.1.1.22 {ECO:0000256|ARBA:ARBA00012954, ECO:0000256|PIRNR:PIRNR000124};	UDP-glucose/GDP-mannose dehydrogenase	GO:0005829,cytosol; GO:0005634,nucleus; GO:0051287,NAD binding; GO:0003979,UDP-glucose 6-dehydrogenase activity; GO:0006024,glycosaminoglycan biosynthetic process; GO:0006065,UDP-glucuronate biosynthetic process; GO:0000166,nucleotide binding; GO:0003674,molecular_function; GO:0005488,binding; GO:0036094,small molecule binding; GO:0097159,organic cyclic compound binding; GO:1901265,nucleoside pho…	PF03721.17:UDP-glucose/GDP-mannose dehydrogenase family, NAD binding domain	--	--	--
PmuVar_Chr1_1904	1.2217	1.4631	1.368	12.1448	13.2632	10.8119	47	64	59	547	499	410	3.45716	5.80792e-87	2.30217e-85	up	Chr1	16289225	16291384	-	PmuVar_Chr1_1904	--	K13416 brassinosteroid insensitive 1-associated receptor kinase 1 [EC:2.7.10.1 2.7.11.1] | (RefSeq) BRASSINOSTEROID INSENSITIVE 1-associated receptor kinase 1-like (A)	ko04016: MAPK signaling pathway - plant; ko04075: Plant hormone signal transduction; ko04626: Plant-pathogen interaction	PREDICTED: probable inactive receptor kinase At5g58300 isoform X1 [Prunus mume]	Y5830_ARATH RecName: Full=Probable inactive receptor kinase At5g58300; Flags: Precursor;	A0A6J5XT66_PRUAR RecName: Full=Protein kinase domain-containing protein {ECO:0000259|PROSITE:PS50011};	--	GO:0016021,integral component of membrane; GO:0005886,plasma membrane; GO:0005524,ATP binding; GO:0004672,protein kinase activity; GO:0006468,protein phosphorylation; GO:0000166,nucleotide binding; GO:0003674,molecular_function; GO:0005488,binding; GO:0017076,purine nucleotide binding; GO:0030554,adenyl nucleotide binding; GO:0032553,ribonucleotide binding; GO:0032555,purine ribonucleotide bindin…	PF00069.28:Protein kinase domain	--	--	--
PmuVar_Chr8_2100	170.068	167.546	172.896	302.724	305.195	296.918	5490	6150	6257	11441	9635	9448	1.12772	7.20348e-87	2.84805e-85	up	Chr8	13491294	13495563	+	PmuVar_Chr8_2100	--	K13412 calcium-dependent protein kinase [EC:2.7.11.1] | (RefSeq) calcium-dependent protein kinase 8-like (A)	ko04626: Plant-pathogen interaction	hypothetical protein GBA52_024204 [Prunus armeniaca]	CDPK8_ARATH RecName: Full=Calcium-dependent protein kinase 8; EC=2.7.11.1; AltName: Full=Calcium-dependent protein kinase isoform CDPK19; Short=AtCDPK19;	A0A6J5XXU8_PRUAR SubName: Full=Uncharacterized protein {ECO:0000313|EMBL:CAB4317082.1};	Ca2+/calmodulin-dependent protein kinase, EF-Hand protein superfamily	GO:0005737,cytoplasm; GO:0005634,nucleus; GO:0005886,plasma membrane; GO:0005524,ATP binding; GO:0005509,calcium ion binding; GO:0009931,calcium-dependent protein serine/threonine kinase activity; GO:0005516,calmodulin binding; GO:0004683,calmodulin-dependent protein kinase activity; GO:0106310,protein serine kinase activity; GO:0035556,intracellular signal transduction; GO:0018105,peptidyl-serin…	PF00069.28:Protein kinase domain	--	--	--
PmuVar_Chr2_4904	368.284	371.678	338.111	855.873	782.549	783.441	2704	3103	2783	7357	5619	5670	1.46992	1.1431e-86	4.50795e-85	up	Chr2	35901700	35902062	+	PmuVar_Chr2_4904	--	--	--	PREDICTED: uncharacterized protein LOC103323023 [Prunus mume]	--	A0A6J5VV89_PRUAR SubName: Full=Uncharacterized protein {ECO:0000313|EMBL:CAB4293269.1};	--	GO:0016021,integral component of membrane; GO:0005575,cellular_component; GO:0016020,membrane; GO:0031224,intrinsic component of membrane; GO:0110165,cellular anatomical entity	--	--	--	--
PmuVar_Chr7_0576	133.916	133.988	135.388	19.0968	24.0399	16.0174	1162	1322	1317	194	204	137	-2.47068	1.16007e-86	4.56324e-85	down	Chr7	4884889	4886002	-	PmuVar_Chr7_0576	--	K07213 copper chaperone | (RefSeq) LOW QUALITY PROTEIN: copper transport protein ATX1-like (A)	--	PREDICTED: heavy metal-associated isoprenylated plant protein 21 [Prunus mume]	HIP30_ARATH RecName: Full=Heavy metal-associated isoprenylated plant protein 30 {ECO:0000303|PubMed:21072340, ECO:0000303|PubMed:23368984}; Short=AtHIP30 {ECO:0000303|PubMed:21072340, ECO:0000303|PubMed:23368984}; AltName: Full=Protein NPCC11 {ECO:0000312|EMBL:AEC06738.1}; Flags: Precursor;	A0A314UT57_PRUYE SubName: Full=Heavy metal-associated isoprenylated plant protein 21 {ECO:0000313|EMBL:PQM40601.1};	Copper chaperone	GO:0046872,metal ion binding; GO:0050896,response to stimulus; GO:0003674,molecular_function; GO:0005488,binding; GO:0043167,ion binding; GO:0043169,cation binding; GO:0008150,biological_process	PF00403.29:Heavy-metal-associated domain	--	--	--
PmuVar_Chr5_3435	31.697	27.1183	29.0936	98.6335	86.7821	88.7793	552	537	568	2011	1478	1524	1.94568	1.85537e-86	7.27974e-85	up	Chr5	29603382	29604596	-	PmuVar_Chr5_3435	--	--	--	PREDICTED: uncharacterized protein LOC103333637 [Prunus mume]	--	A0A6P5TGL3_PRUAV SubName: Full=uncharacterized protein LOC110767169 {ECO:0000313|RefSeq:XP_021826319.1};	--	GO:0008080,N-acetyltransferase activity; GO:0003674,molecular_function; GO:0003824,catalytic activity; GO:0016407,acetyltransferase activity; GO:0016410,N-acyltransferase activity; GO:0016740,transferase activity; GO:0016746,transferase activity, transferring acyl groups; GO:0016747,transferase activity, transferring acyl groups other than amino-acyl groups	PF00583.28:Acetyltransferase (GNAT) family	GNAT	TR	GNAT
PmuVar_Chr5_3220	147.675	124.189	127.26	15.3185	11.8952	11.4738	914	874	883	111	72	70	-3.05564	3.11882e-86	1.2206e-84	down	Chr5	28419056	28419361	-	PmuVar_Chr5_3220	--	--	--	hypothetical protein GBA52_006176 [Prunus armeniaca]	--	M5X6K0_PRUPE RecName: Full=LysM domain-containing protein {ECO:0000259|Pfam:PF01476};	--	GO:0005886,plasma membrane; GO:0005575,cellular_component; GO:0016020,membrane; GO:0071944,cell periphery; GO:0110165,cellular anatomical entity	PF01476.23:LysM domain	--	--	--
PmuVar_Chr2_0845	62.0338	61.6653	65.944	159.157	168.197	145.581	798	902	951	2397	2116	1846	1.61954	8.70958e-86	3.40004e-84	up	Chr2	7131130	7133100	+	PmuVar_Chr2_0845	--	--	--	PREDICTED: uncharacterized protein LOC103319831 [Prunus mume]	--	A0A6J5WBL0_PRUAR SubName: Full=Uncharacterized protein {ECO:0000313|EMBL:CAB4297425.1};	--	--	PF05340.15:Protein of unknown function (DUF740)	--	--	--
PmuVar_Chr2_2606	36.9087	35.3277	36.5597	95.2728	93.473	83.464	860	936	955	2599	2130	1917	1.62529	9.24668e-86	3.60062e-84	up	Chr2	18253029	18254792	+	PmuVar_Chr2_2606	--	--	--	PREDICTED: suppressor protein SRP40 [Prunus mume]	--	A0A6J5W5P0_PRUAR SubName: Full=Uncharacterized protein {ECO:0000313|EMBL:CAB4295591.1};	Spindle pole body protein	GO:0015031,protein transport; GO:0006810,transport; GO:0006811,ion transport; GO:0006820,anion transport; GO:0008104,protein localization; GO:0008150,biological_process; GO:0015833,peptide transport; GO:0033036,macromolecule localization; GO:0042886,amide transport; GO:0045184,establishment of protein localization; GO:0051179,localization; GO:0051234,establishment of localization; GO:0071702,orga…	PF03398.17:Regulator of Vps4 activity in the MVB pathway	--	--	--
PmuVar_Chr2_0915	938.102	838.666	887.116	1731.95	1726.14	1743.11	5920	6018	6276	12796	10653	10843	1.26765	1.20627e-85	4.68537e-84	up	Chr2	7591869	7594313	+	PmuVar_Chr2_0915	--	K09264 MADS-box transcription factor, plant | (RefSeq) floral homeotic protein PMADS 2 (A)	--	unnamed protein product [Prunus armeniaca]	MADS9_VITVI RecName: Full=Agamous-like MADS-box protein MADS9 {ECO:0000305}; AltName: Full=PISTILLATA-like protein {ECO:0000305}; Short=VvPI {ECO:0000303|PubMed:18997115, ECO:0000303|PubMed:23181568}; Short=VviPI {ECO:0000303|PubMed:26818751}; AltName: Full=Protein FLESHLESS BERRY {ECO:0000303|PubMed:23181568}; AltName: Full=VvMADS9 {ECO:0000303|Ref.1};	A0A5E4EDH9_PRUDU SubName: Full=PREDICTED: PISTILLATA {ECO:0000313|EMBL:VVA13506.1};	MADS box transcription factor	GO:0005634,nucleus; GO:0000981,DNA-binding transcription factor activity, RNA polymerase II-specific; GO:0046983,protein dimerization activity; GO:0000978,RNA polymerase II cis-regulatory region sequence-specific DNA binding; GO:0045944,positive regulation of transcription by RNA polymerase II; GO:0006357,regulation of transcription by RNA polymerase II; GO:0010095,specification of petal identity…	PF00319.21:SRF-type transcription factor (DNA-binding and dimerisation domain)	MADS-M-type	TF	MADS->MADS-M-type
[truncated: 4,260 more rows]
