# Supplementary material for: Integration of Metabolomic and Transcriptomic Analyses Reveals the Molecular Mechanisms of Flower Color Formation in Prunus mume
Source: Plants (Basel). 2024 Apr 11;13(8):1077. doi: 10.3390/plants13081077 (PMC11054544; doi:10.3390/plants13081077)
Supplement: Supplementary file 1 [file plants-13-01077-s001.zip › Supplementary Table S5.xlsx]

## Sheet: Sheet1
Table S5: CDS sequences and cloning primers of 13 structural genes.
Gene Name	CDS sequence	Primer-F (5’-3’)	Primer-R (5’-3’)
PmCHI	ATGGCTGCACTACCAAATCTCACCGGACTTCAGATCGAGGCGACGTCGTTTCCACCGTCAGTCAAACCCCCAGGCTCCGCCAACACACTGTTCCTCGGCGGCGCAGGGGCGAGGGGGCTGGAGATTCAGGGAAACTTCGTGAAGTTCACTGCGATTGGCGTGTACTTGGAGGATAAGGCCGTGCCTCTGCTCGCCGTTAAGTGGAAGGGCAAGACCGCCCAGGAGCTGACGGAGTCCGATGAGTTCTTCAGAGAGATCGTTACAGGTCCATTTGAGAAATTTACACAGGTGACAACGATACTGCCACTAACCGGCAAGCAATACTCGGAGAAGGTTTCGGAGAATTGCGTTGCGATTTGGAAATCAATCGGAATTTACACTGATGCAGAAGACAAGGCC…	ATGGCTGCACTACCAAATC	CTACTTCAACAATTCAGA
PmFLS	ATGAACTGCCCGTCGGATTGGCCAGAGCCAATAGTCCGGGTCCAGTCCTTGTCCGAGACCGGTGTGTTTCCAGACCGATACATCAAGCCCCCAACGCAAAGACCAACCCCAATCTTCTCCAATTCTGATCAAGCCACCCATACCAACATCCCAATCATTGACTTCCAAGGCTTGGACGACGATCATCTGCGAGCCACCACACTTGGCCAAATTTCTGAGGCCTGCCGGGACTGGGGGTTCTTCCAAGTCGTGAACCATGGCGTTAGCCCCGGTTTGATGGACCGGACCCAGGAGGTTTGGCGCCAATTCTTCCATTTGCCGATGGAGCTGAAGCAAGCCTACGCTAACTCACCCAAGACCTATGAAGGGTACGGCAGCAGGCTTGGGGTTGAGAAAGGT…	ATGAACTGCCCGTCGGATTG	CTATTTTCGTGGAGACTT
PmDFR	ATGGGACCAGAGTCCGAATCTGTTTGTGTGACGGGCGCTTCGGGTTTCATCGGCTCATGGCTCATCATGAGACTCTTAGAGCGCGGTTACACTGTTCGAGCCACCGTGAGGGATCCTGCGAATCAGAAGAAGGTGAAGCATCTGCTGGACTTGCCAAAGGCCGAGACGCACTTGACGCTGTGGAAGGCTGACCTGGCCGACGAGGGAAGCTTTGATGAAGCCATTCAAGGCTGCACCGGAGTGTTCCATGTCGCCACTCCTATGGATTTTGAGTCCAAAGACCCCGAGAACGAAGTGATCAAGCCAACAATAAATGGGGTGCTAGACATCCTCAAGGCATGCCTCAAGGCAAAAACAGTTCGAAGGCTGGTGTTTACATCCTCAGCAGGAACCGTGAAT…	ATGGGACCAGAGTCCGAATC	TTAACCGGAGACTTTGAC
PmLAR	ATGACCGTGTCAACTTGTGTTTCGGCAGCCAAGAATGGCAGAATCTTCATTGTTGGTGCTACTGGTTTCATCGGGAGGTTTGTGGCTGAAGCTAGCCTTGATGCTGGCCAACCCACTTATGTTCTGGTCCGGCCAGGCCCTCTTGACCCTTCTAAGGCTGACATCATCAAAGCCCTCAAAGACAGAGGCGCTATAATCTTACATGGGGTGATTTCTGATAAGGCACTGATGGAGAAACTGCTAAGAGAGCATGAGATTGAGGTGGTAATATCAGCCGTGGGTGGAGCAACAATATTGGACCAGATCACCCTGGTTGAGGCCATTCAAGCTGTTGGCACAATTAAGAGGTTTTTGCCGTCAGAGTTTGGGCACGATGTGGACAGGGCTGAGCCGGTGGAA…	ATGACCGTGTCAACTTGTG	TCAAGCACACGTGGCTGTGA
PmANS	ATGGTGAGCTCTGATTCAGTGGACTCAAGCTCTGATTCAGTGAACTCAAGAGTTGAGACCTTGGCCAGCAGTGGAATTGCAACAATCCCAAAGGAGTACATCAGACCAAAGGAAGAGCTCGTAAACATCGGTGACATCTTCGAACAGGAGAAGAGCACTGATGGGCCTCAAGTTCCCACCATTGATTTGAAGGAGATAGACTCTGAGAACGAAAAGGTGAGAGAGAGATGCAGGGAGGAGTTGAAGAAGGCAGCAGTGGACTGGGGTGTCATGCATCTTGTGAACCATGGCATCTCCGATGAGCTCATGGACCGTGTCAGGAAGGCTGGGAAGGCCTTCTTCGATCTTCCCATTGAGCAAAAGGAGAAGTATGCCAATGACCAGGCCTCTGGCAAAATT…	ATGGTGAGCTCTGATTCAGTG	TCACTTGTTGAGCAGAGCCT
PmANR1	ATGGCCACCCAACCCATCTCAAAGAAGACAGCCTGTGTGATCGGAGGTACAGGGTTCGTGGCATCTTTGCTGGTGAAGCTGTTGCTAGAGAAGGGCTATGCCGTCAAAACCACTGTCAGAGACCCTGACAATCAGAAGAAGATCTCTCACCTCACAGCACTACAAGATTTGGGTGAACTAGAAATTTTAGCAGCAGATCTAACTGATGAAGGGAGCTTTGATGCCCCCATATCAGATTGTGACCTTGTTTTCCATGTTGCCACACCTGTCAACTTTGCCTCCGAGGACCCTGAGAACGACATGATCAAACCAGCAGTTCAAGGGGTGCTAAACGTTCTGAAAGCATGCGTGAAAGCCAAAACAGTTAAACGCGTTGTTTTGACATCATCAGCAGCTGCA…	ATGGCCACCCAACCCATCT	CTAGTTCTGCAGCAGCCC
PmANR2	ATGGAGAAGAACAAAATTTCTAGAGTTTGTGTTACAGGGGGTGCCGGATTCATTGGTTGTTCGCTTGTTAAAAAGCTCCTAGAGCAGGGCCATACTGTCCATGCCACTCTGAGGAACTTGGAGGATGCATCCAAAGTAGGCCTTCTCAAGTCCCTCCCTAATGCAGACACCAAATTGTTGCTTTTCCAAGCTGACATATATGACCCCAATGAGTTTCAACCCGCCATCCAAGGATGTGAGTTTGTTTTTCACGTGGCCACTCCAATGCAGCATAGCAACCAAAGCTCTCAGTACAAGGACACAGCTGAAGCTGCCGTCGCTGGGGTGAGGATCATTGCCGAGTCTTGCATTCGTTCACAGACCGTTAAGCGACTCATCTACACTGCAAGCATCCTTGCT…	ATGGAGAAGAACAAAATT	TTAAATAAGTTGAGAAAAAG
PmGT1	ATGGAAAAAGCTTCACAGCTAGTCTTCATCCCTTCCGCCGGCATGGGCCACCTCGTCTCCGCCGTCGAGATGGCAAGGCTCCTCGTTGCTCGACACGACCGACTTTTCATCACCGTCTTCATCATGAAGCTACCCTTCGACTCGAAAGGCACCGAGTCCTACATAGCCTCCCTCGAGGCCTCTCCCGTGTCGCCACGTGTCAACTTCATCACCCTCCCAAAAGTTCCTACCATAGACAAGCACATGAGCCCCAACTCCTTCCGCAACCAGTTCATCGAAAGTCACAAAACCCACGTCAAAAACGCGGTCGCCGAACTCACCGAGTCTGAGTCCGATTCAAGGCCTCGGCTCGCTGGGTTCATCATCGACATGTTTTGTACAACAATGATCGACGTGGCG…	ATGGAAAAAGCTTCACAGCTA	TCAAAGAAAAATCTGATC
PmGT2	ATGAAGAGACCAGCACAACTTGTGTTCATCCCAGCCCCAGGCGCTGGCCACATCGTGTCAACGGTCGAGATCGCAAAGCAACTCGTTGCTCGAGATGACCAGCTCTTCATCACCATCCTCATCATGAAGCTCCCCTTCGACAAGCTCTTCATCAATACAGACCCTTCAATCTCACACCGCATCAGCTTCATCAACCTCCCGGAGTCCCACATCGACACACAGGGCCTTGCCTTCCCTTCCTTCATCAAAACATTTGTCCAAGGCCACAAAACCCACGTCAAAGACGCCGTCACAAAGTTACTCGCTGAGTCCGCTCAGGTCGAGCTTGCCGGGTTTGTCATCGACATGTTCTGCACCCCCATGATCAACGTGGCGGACGAATTCCAAATTCCTTCCTAC…	ATGAAGAGACCAGCACAACT	TTAAATCTGGTCAAGAAAACG
PmGT5	ATGGCTTCTCATCAACAAAGCCAGCTTCACTTTCTCTTGTTGCCCTTTCCGGCCTCAGGCCACTTGATCCCAATGACAGACATTGGCAGACTGTTGGCACAACGAGGGATCCTTGTCACCCTCGTCACCACTCCACATAATGCAGCACGTGTTGAAGCGGTCGTTACTCGAGCCGTAGAATCCGGGCTCCAAATCCGGTTAATCCAACTGAAATTTCCAAGTGAAGAAGCAGGATTGCCTGATGGTTGCGAGAACCCTGAATTGCTACCTTCACAAGACCTGATCTTGAATTTTTTTGCAGCAACTGCCCTGCTTCAACAGCCGGTAGAGAAACTGTTTGAAGAGCTTATCCCGAAGCCAAACTGCATAATCTCAGACATGTGTCTTCCATGGACAGCC…	ATGGCTTCTCATCAACAA	TTAGTTTGTCTGACTGCAG
PmGST1	ATGGCTTACAAACATGAGGATCTTTCTCCACCGCTGGATTCCACTTCCAGCCCACCTCCTCTTTTTGATGGCACTACAAGGCTGTACGTATCTTATTCCTGCCCATTTGCACAGCGGGTGTGGATCACTAGGAATTATAAGGGTTTGCAAGAGAAGATCAAGTTAGTCCCTATAAATCTTCAAAACAGGCCTGCTTGGTACAAGGAAAAGGTCTATCCTGAGAATAAGGTGCCATCACTGGAGCACAATGGAAAGGTCATTGGAGAGAGTCTTGATCTGATCAAATATGTGGATAGTAACTTTGAAGGGCCTTCACTTTTCCCCACTGACCCTGAGAGAAGAAAGTTTGGTGAAGAACTAATAACCTACACTGATACCTTCACTAGGGCCTTGTATTCA…	ATGGCTTACAAACATGAGGA	TTACTGTTGGTCCAAGAAGC
PmGST2	ATGGCGGATCAGGTGGTTTTGTTGGATTTCTGGCCCAGCCCTTTTGGGATGAGGCTGAGAATTGCTCTGGCTGAGAAGGGCGTTCAGTATGAGTACAAAGAAGAGGACTTGAGGAACAAGAGCCCACTCTTGCTCCAGTCGAACCCGGTTCACAAGAAGATCCCGGTGCTCATTCACAATGGCAAAGCGGTCTCTGAGTCCCTCATTGCGGTTCAGTACGTTGATGAGGTTTGGAAGGATAAGGCTCCTCTGCTGCCTTCTGATCCTCACCTCCGAGCCCAAGCCAGGTTCTGGGCTGATTACGTTGACAAGAAGATGTATGAGATTGGGAGGAAGGTGTGGACAACTAAAGGAGAAGAACAGGATGCAGCAAAGAAGGAGTTCCTTGAGTGCATTAGG…	ATGGCGGATCAGGTGGTTTTG	TTACTCTACTCCAAGCTTTTTCCTC
PmGST3	ATGGTTGTGAAAGTGTATGGTCCAGTCAAGGCAGCCTGCCCTCAGAGGGTTATGGTTTGTCTTTTGGAGAAAGGAGTGAATTTCGAAATTGTTGATGTTAATCTTGAGGTGGGAGAGCAAAAGCGACCTCAGTTCCTCTCCCGTCAGCCGTTTGGTCAAGTTCCAGTAGTAGAAGATGGTGATTTCAGGCTATTTGAATCTAGGGCTATTATCAGATACTACGCAGCCAAGTACGCCGACCGTGGTCCCAACCTATTGGGAACAACCCTGGAGGAGAAGGCTCTGGTGGATCAGTGGCTGGAAGTAGAAGCTCACAATTTCAATGACTTGGTTTACACTCTGGTACTTCAACTTCTGGTGCTGCCTCGCATGGGGGAGCGTGGTGACGTGGCCTTGGTC…	ATGGTTGTGAAAGTGTATGGTC	CTAGTCACTAGCAAGGCTCA
