# Supplementary material for: Integration of Metabolomic and Transcriptomic Analyses Reveals the Molecular Mechanisms of Flower Color Formation in Prunus mume
Source: Plants (Basel). 2024 Apr 11;13(8):1077. doi: 10.3390/plants13081077 (PMC11054544; doi:10.3390/plants13081077)
Supplement: Supplementary file 1 [file plants-13-01077-s001.zip › Supplementary Table S6.xlsx]

## Sheet: Sheet1
Table S6：Differentially expressed gene sequence number.
Gene ID	Gene Name
PmuVar_Chr1_2641	PmMYB1
PmuVar_Chr2_1462	PmMYB2
PmuVar_Chr2_1651	PmMYB3
PmuVar_Chr2_1735	PmMYB4
PmuVar_Chr2_1742	PmMYB5
PmuVar_Chr2_2047	PmMYB6
PmuVar_Chr2_2570	PmMYB7
PmuVar_Chr2_3016	PmMYB8
PmuVar_Chr2_4679	PmMYB9
PmuVar_Chr3_0248	PmMYB10
PmuVar_Chr3_0326	PmMYB11
PmuVar_Chr3_1351	PmMYB12
PmuVar_Chr3_3127	PmMYB13
PmuVar_Chr4_1267	PmMYB14
PmuVar_Chr4_1451	PmMYB15
PmuVar_Chr4_2167	PmMYB16
PmuVar_Chr4_3428	PmMYB17
PmuVar_Chr5_0699	PmMYB18
PmuVar_Chr5_2828	PmMYB19
PmuVar_Chr5_3581	PmMYB20
PmuVar_Chr6_0747	PmMYB21
PmuVar_Chr6_1753	PmMYB22
PmuVar_Chr7_1148	PmMYB23
PmuVar_Chr7_2373	PmMYB24
PmuVar_Chr8_1153	PmMYB25
PmuVar_Chr8_1863	PmMYB26
PmuVar_Chr7_1433	PmMYB27
PmuVar_Chr1_1727	PmbHLH1
PmuVar_Chr1_2063	PmbHLH2
PmuVar_Chr1_2804	PmbHLH3
PmuVar_Chr2_0557	PmbHLH4
PmuVar_Chr2_1964	PmbHLH5
PmuVar_Chr2_2571	PmbHLH6
PmuVar_Chr2_2999	PmbHLH7
PmuVar_Chr2_4541	PmbHLH8
PmuVar_Chr2_4715	PmbHLH9
PmuVar_Chr2_5329	PmbHLH10
PmuVar_Chr2_5475	PmbHLH11
PmuVar_Chr3_0295	PmbHLH12
PmuVar_Chr6_1141	PmbHLH13
PmuVar_Chr6_1457	PmbHLH14
PmuVar_Chr6_1789	PmbHLH15
PmuVar_Chr6_1818	PmbHLH16
PmuVar_Chr6_2751	PmbHLH17
PmuVar_Chr7_0504	PmbHLH18
PmuVar_Chr7_1106	PmbHLH19
PmuVar_Chr7_2020	PmbHLH20
PmuVar_Chr8_0626	PmbHLH21
PmuVar_Chr8_0960	PmbHLH22
PmuVar_Chr8_1180	PmbHLH23
PmuVar_Chr1_1226	PmWRKY1
PmuVar_Chr1_1351	PmWRKY2
PmuVar_Chr1_1800	PmWRKY3
PmuVar_Chr1_2527	PmWRKY4
PmuVar_Chr1_2949	PmWRKY5
PmuVar_Chr2_1204	PmWRKY6
PmuVar_Chr2_1630	PmWRKY7
PmuVar_Chr2_1701	PmWRKY8
PmuVar_Chr2_2849	PmWRKY9
PmuVar_Chr2_4713	PmWRKY10
PmuVar_Chr3_0705	PmWRKY11
PmuVar_Chr3_0786	PmWRKY12
PmuVar_Chr3_2414	PmWRKY13
PmuVar_Chr4_0869	PmWRKY14
PmuVar_Chr4_2902	PmWRKY15
PmuVar_Chr4_3243	PmWRKY16
PmuVar_Chr5_2248	PmWRKY17
PmuVar_Chr6_1096	PmWRKY18
PmuVar_Chr6_2169	PmWRKY19
PmuVar_Chr7_0270	PmWRKY20
PmuVar_Chr7_1085	PmWRKY21
PmuVar_Chr8_0249	PmWRKY22
PmuVar_Chr5_2641	PmCHI
PmuVar_Chr5_2882	PmFLS
PmuVar_Chr2_1952	PmDFR
PmuVar_Chr2_2636	PmLAR
PmuVar_Chr7_0046	PmANS
PmuVar_Chr3_0281	PmANR1
PmuVar_Chr7_0379	PmANR2
PmuVar_Chr4_3155	PmGT1
PmuVar_Chr4_3147	PmGT2
PmuVar_Chr8_1583	PmGT5
PmuVar_Chr1_1356	PmGST1
PmuVar_Chr3_1598	PmGST2
PmuVar_Chr4_1734	PmGST3
