# Supplementary material for: Integration of Metabolomic and Transcriptomic Analyses Reveals the Molecular Mechanisms of Flower Color Formation in Prunus mume
Source: Plants (Basel). 2024 Apr 11;13(8):1077. doi: 10.3390/plants13081077 (PMC11054544; doi:10.3390/plants13081077)
Supplement: Supplementary file 1 [file plants-13-01077-s001.zip › Supplementary Table S7.xlsx]

## Sheet: Sheet1
Table S7: Correlation between structural genes and transcription factors.
Structural gene	Transcription factor	Correlation	P-value
PmANR1	PmbHLH1	0.976457	0.000824881
PmANR1	PmbHLH10	-0.967277	0.0015887
PmANR1	PmbHLH12	0.98795	0.000216917
PmANR1	PmbHLH16	0.993356	6.6062e-05
PmANR1	PmbHLH2	0.988751	0.000189093
PmANR1	PmbHLH20	-0.988052	0.00021328
PmANR1	PmbHLH23	0.975976	0.000858804
PmANR1	PmbHLH3	0.958828	0.00250783
PmANR1	PmbHLH4	-0.976844	0.000798109
PmANR1	PmbHLH5	0.962902	0.00203881
PmANR1	PmbHLH7	-0.962098	0.00212764
PmANR1	PmbHLH9	-0.961971	0.0021418
PmANR1	PmMYB1	-0.985136	0.000329759
PmANR1	PmMYB10	0.945681	0.00434569
PmANR1	PmMYB11	0.985498	0.000313949
PmANR1	PmMYB13	0.936149	0.00598536
PmANR1	PmMYB16	-0.971244	0.00122844
PmANR1	PmMYB17	-0.982002	0.000482973
PmANR1	PmMYB18	0.919792	0.00939197
PmANR1	PmMYB19	0.936624	0.00589756
PmANR1	PmMYB22	-0.994124	5.16966e-05
PmANR1	PmMYB23	-0.99186	9.91299e-05
PmANR1	PmMYB25	0.970804	0.00126616
PmANR1	PmMYB26	0.971958	0.00116852
PmANR1	PmMYB27	0.979613	0.000619191
PmANR1	PmMYB3	0.980391	0.000573015
PmANR1	PmMYB4	-0.920623	0.00920105
PmANR1	PmMYB5	0.98457	0.000355276
PmANR1	PmMYB7	0.969681	0.00136492
PmANR1	PmMYB9	0.991799	0.000100605
PmANR1	PmWRKY1	0.980733	0.000553249
PmANR1	PmWRKY10	-0.963565	0.0019671
PmANR1	PmWRKY14	0.947631	0.004042
PmANR1	PmWRKY17	-0.951511	0.00346978
PmANR1	PmWRKY2	0.970175	0.00132102
PmANR1	PmWRKY22	0.983439	0.000409113
PmANR1	PmWRKY4	0.991211	0.000115526
PmANR1	PmWRKY5	0.973236	0.00106489
PmANR1	PmWRKY6	-0.952183	0.00337508
PmANR1	PmWRKY8	0.944507	0.0045337
PmANR2	PmbHLH1	0.960667	0.00229022
PmANR2	PmbHLH10	-0.961374	0.00220914
PmANR2	PmbHLH12	0.98457	0.000355307
PmANR2	PmbHLH16	0.988523	0.00019684
PmANR2	PmbHLH18	-0.920978	0.00912009
PmANR2	PmbHLH2	0.986766	0.000261543
PmANR2	PmbHLH20	-0.974157	0.000993186
PmANR2	PmbHLH23	0.964126	0.00190729
PmANR2	PmbHLH3	0.944637	0.00451273
PmANR2	PmbHLH4	-0.969366	0.00139326
PmANR2	PmbHLH5	0.946988	0.0041409
PmANR2	PmbHLH7	-0.94111	0.00509994
PmANR2	PmbHLH9	-0.948059	0.00397672
PmANR2	PmMYB1	-0.986447	0.000274287
PmANR2	PmMYB10	0.935222	0.00615832
PmANR2	PmMYB11	0.97666	0.000810776
PmANR2	PmMYB12	0.931249	0.00692759
PmANR2	PmMYB13	0.935002	0.00619987
PmANR2	PmMYB16	-0.950089	0.00367446
PmANR2	PmMYB17	-0.97441	0.000973859
PmANR2	PmMYB19	0.922198	0.00884416
PmANR2	PmMYB22	-0.982437	0.000459998
PmANR2	PmMYB23	-0.980723	0.000553849
PmANR2	PmMYB25	0.958937	0.00249462
PmANR2	PmMYB26	0.965	0.00181604
PmANR2	PmMYB27	0.970538	0.00128924
PmANR2	PmMYB3	0.980684	0.000556032
PmANR2	PmMYB5	0.973943	0.00100963
PmANR2	PmMYB7	0.973784	0.00102191
PmANR2	PmMYB9	0.98838	0.000201757
PmANR2	PmWRKY1	0.972832	0.00109709
PmANR2	PmWRKY10	-0.944579	0.00452213
PmANR2	PmWRKY14	0.946741	0.00417921
PmANR2	PmWRKY17	-0.949309	0.00378931
PmANR2	PmWRKY2	0.948825	0.00386135
PmANR2	PmWRKY22	0.974618	0.000958206
PmANR2	PmWRKY4	0.988643	0.000192755
PmANR2	PmWRKY5	0.953966	0.00312986
PmANR2	PmWRKY6	-0.946711	0.00418397
PmANR2	PmWRKY8	0.956697	0.00277212
PmANS	PmbHLH1	-0.922119	0.00886206
PmANS	PmbHLH10	0.936625	0.00589726
PmANS	PmbHLH12	-0.974498	0.00096727
PmANS	PmbHLH16	-0.965831	0.00173131
PmANS	PmbHLH2	-0.973764	0.00102345
PmANS	PmbHLH3	-0.946468	0.00422175
PmANS	PmbHLH4	0.942912	0.00479561
PmANS	PmbHLH5	-0.929188	0.00734393
PmANS	PmMYB1	0.963014	0.0020267
PmANS	PmMYB17	0.939491	0.0053813
PmANS	PmMYB19	-0.922223	0.00883868
PmANS	PmMYB22	0.924706	0.00829037
PmANS	PmMYB23	0.92587	0.0080391
PmANS	PmMYB27	-0.918865	0.00960731
PmANS	PmMYB3	-0.956388	0.00281148
PmANS	PmMYB9	-0.966748	0.00164015
PmANS	PmWRKY1	-0.963853	0.00193626
PmANS	PmWRKY4	-0.945022	0.00445086
PmANS	PmWRKY8	-0.98926	0.000172418
PmCHI	PmbHLH1	-0.990565	0.000133097
PmCHI	PmbHLH10	0.968985	0.00142794
PmCHI	PmbHLH12	-0.97888	0.000664364
PmCHI	PmbHLH14	0.921031	0.00910785
PmCHI	PmbHLH16	-0.985992	0.000292973
PmCHI	PmbHLH2	-0.979799	0.000608003
PmCHI	PmbHLH20	0.999682	1.51862e-07
PmCHI	PmbHLH23	-0.983899	0.000386785
PmCHI	PmbHLH3	-0.966731	0.00164182
PmCHI	PmbHLH4	0.975692	0.000879125
PmCHI	PmbHLH5	-0.978323	0.000699772
PmCHI	PmbHLH7	0.987281	0.000241617
PmCHI	PmbHLH9	0.981783	0.00049477
PmCHI	PmMYB1	0.97347	0.00104645
PmCHI	PmMYB10	-0.963625	0.00196063
PmCHI	PmMYB11	-0.984271	0.000369151
PmCHI	PmMYB13	-0.945111	0.00443652
PmCHI	PmMYB16	0.986432	0.000274884
PmCHI	PmMYB17	0.987261	0.000242379
PmCHI	PmMYB18	-0.935289	0.00614585
PmCHI	PmMYB19	-0.954011	0.00312387
PmCHI	PmMYB22	0.99534	3.25188e-05
PmCHI	PmMYB23	0.999045	1.36853e-06
PmCHI	PmMYB25	-0.965632	0.00175141
PmCHI	PmMYB26	-0.963147	0.00201221
PmCHI	PmMYB27	-0.990829	0.000125774
PmCHI	PmMYB3	-0.956152	0.00284186
PmCHI	PmMYB4	0.953556	0.00318542
PmCHI	PmMYB5	-0.987486	0.000233927
PmCHI	PmMYB7	-0.946006	0.00429437
PmCHI	PmMYB9	-0.985391	0.000318574
PmCHI	PmWRKY1	-0.980619	0.000559784
PmCHI	PmWRKY10	0.987716	0.000225403
PmCHI	PmWRKY11	0.933263	0.00653211
PmCHI	PmWRKY14	-0.957523	0.00266817
PmCHI	PmWRKY16	-0.926818	0.00783747
PmCHI	PmWRKY17	0.929317	0.00731765
PmCHI	PmWRKY2	-0.989235	0.000173203
PmCHI	PmWRKY22	-0.986001	0.000292604
PmCHI	PmWRKY4	-0.982049	0.000480489
PmCHI	PmWRKY5	-0.983434	0.000409397
PmCHI	PmWRKY6	0.967283	0.00158808
PmCHI	PmWRKY8	-0.919897	0.00936774
PmDFR	PmbHLH1	0.983451	0.00040856
PmDFR	PmbHLH10	-0.992093	9.35248e-05
PmDFR	PmbHLH12	0.988402	0.000200992
PmDFR	PmbHLH14	-0.928546	0.00747608
PmDFR	PmbHLH16	0.990671	0.000130144
PmDFR	PmbHLH2	0.990238	0.000142468
PmDFR	PmbHLH20	-0.988935	0.00018297
PmDFR	PmbHLH22	0.922655	0.00874213
PmDFR	PmbHLH23	0.983084	0.000426791
PmDFR	PmbHLH3	0.980197	0.000584361
PmDFR	PmbHLH4	-0.995021	3.71171e-05
PmDFR	PmbHLH5	0.989155	0.000175792
PmDFR	PmbHLH7	-0.986655	0.000265935
PmDFR	PmbHLH9	-0.956103	0.00284813
PmDFR	PmMYB1	-0.967648	0.00155305
PmDFR	PmMYB10	0.982598	0.00045161
PmDFR	PmMYB11	0.966294	0.00168503
PmDFR	PmMYB13	0.961159	0.00223361
PmDFR	PmMYB16	-0.965527	0.00176214
PmDFR	PmMYB17	-0.998321	4.22866e-06
PmDFR	PmMYB18	0.952994	0.00326246
PmDFR	PmMYB19	0.951443	0.00347938
PmDFR	PmMYB22	-0.986997	0.000252529
PmDFR	PmMYB23	-0.9959	2.51762e-05
PmDFR	PmMYB25	0.963927	0.00192844
PmDFR	PmMYB26	0.93821	0.00560909
PmDFR	PmMYB27	0.994495	4.53722e-05
PmDFR	PmMYB3	0.94673	0.00418103
PmDFR	PmMYB4	-0.917265	0.00998448
PmDFR	PmMYB5	0.992398	8.64583e-05
PmDFR	PmMYB7	0.930493	0.00707898
PmDFR	PmMYB9	0.993215	6.89066e-05
PmDFR	PmWRKY1	0.989329	0.000170184
PmDFR	PmWRKY10	-0.962959	0.0020326
PmDFR	PmWRKY14	0.948214	0.00395322
PmDFR	PmWRKY16	0.930294	0.00711899
PmDFR	PmWRKY17	-0.947548	0.00405469
PmDFR	PmWRKY2	0.967642	0.00155361
PmDFR	PmWRKY22	0.972394	0.00113258
PmDFR	PmWRKY4	0.993087	7.15229e-05
PmDFR	PmWRKY5	0.960797	0.00227518
PmDFR	PmWRKY6	-0.95501	0.00299065
PmDFR	PmWRKY8	0.940478	0.00520878
PmGST1	PmbHLH10	0.926858	0.00782906
PmGST1	PmbHLH12	-0.950143	0.00366668
PmGST1	PmbHLH16	-0.948992	0.00383641
PmGST1	PmbHLH18	0.922724	0.00872674
PmGST1	PmbHLH2	-0.940901	0.00513589
PmGST1	PmbHLH3	-0.950217	0.00365583
PmGST1	PmbHLH4	0.951106	0.00352749
PmGST1	PmbHLH5	-0.93032	0.0071137
PmGST1	PmMYB15	0.963206	0.00200576
PmGST1	PmMYB17	0.91944	0.00947355
PmGST1	PmMYB22	0.940252	0.00524803
PmGST1	PmMYB23	0.921151	0.00908058
PmGST1	PmMYB25	-0.946117	0.00427682
PmGST1	PmMYB3	-0.940134	0.00526859
PmGST1	PmMYB5	-0.934329	0.00632744
PmGST1	PmMYB9	-0.938782	0.00550682
PmGST1	PmWRKY1	-0.94337	0.00471966
PmGST1	PmWRKY17	0.957017	0.00273162
PmGST1	PmWRKY4	-0.940676	0.00517456
PmGST2	PmbHLH1	-0.943106	0.00476335
PmGST2	PmbHLH10	0.969375	0.0013925
PmGST2	PmbHLH12	-0.973968	0.00100767
PmGST2	PmbHLH16	-0.974001	0.00100514
PmGST2	PmbHLH18	0.948512	0.00390827
PmGST2	PmbHLH2	-0.970004	0.00133612
PmGST2	PmbHLH20	0.945801	0.00432673
PmGST2	PmbHLH23	-0.951893	0.00341573
PmGST2	PmbHLH3	-0.967201	0.00159604
PmGST2	PmbHLH4	0.984528	0.000357231
PmGST2	PmbHLH5	-0.959684	0.00240532
PmGST2	PmbHLH7	0.944216	0.00458099
PmGST2	PmMYB1	0.928443	0.00749736
PmGST2	PmMYB10	-0.929595	0.00726075
PmGST2	PmMYB11	-0.935342	0.00613584
PmGST2	PmMYB15	0.919486	0.00946279
PmGST2	PmMYB16	0.937359	0.00576297
PmGST2	PmMYB17	0.962189	0.00211753
PmGST2	PmMYB22	0.966391	0.00167539
PmGST2	PmMYB23	0.95881	0.00250999
PmGST2	PmMYB25	-0.972035	0.00116215
PmGST2	PmMYB26	-0.917749	0.00986972
PmGST2	PmMYB27	-0.94197	0.00495359
PmGST2	PmMYB3	-0.947925	0.00399705
PmGST2	PmMYB5	-0.973799	0.00102075
PmGST2	PmMYB9	-0.969843	0.00135045
PmGST2	PmWRKY1	-0.967711	0.00154705
PmGST2	PmWRKY17	0.979762	0.000610213
PmGST2	PmWRKY2	-0.928179	0.00755213
PmGST2	PmWRKY22	-0.9336	0.00646697
PmGST2	PmWRKY4	-0.978169	0.000709656
PmGST2	PmWRKY5	-0.938546	0.00554893
PmGST3	PmbHLH1	-0.975302	0.000907425
PmGST3	PmbHLH10	0.960599	0.00229811
PmGST3	PmbHLH12	-0.979645	0.000617278
PmGST3	PmbHLH16	-0.984721	0.000348393
PmGST3	PmbHLH2	-0.974596	0.000959838
PmGST3	PmbHLH20	0.977131	0.000778517
PmGST3	PmbHLH23	-0.96619	0.00169531
PmGST3	PmbHLH3	-0.975432	0.000897939
PmGST3	PmbHLH4	0.978436	0.00069249
PmGST3	PmbHLH5	-0.97239	0.00113298
PmGST3	PmbHLH7	0.967432	0.00157377
PmGST3	PmbHLH9	0.929217	0.00733805
PmGST3	PmMYB1	0.951556	0.00346336
PmGST3	PmMYB10	-0.931944	0.00678976
PmGST3	PmMYB11	-0.966106	0.00170376
PmGST3	PmMYB16	0.980554	0.000563549
PmGST3	PmMYB17	0.969225	0.0014061
PmGST3	PmMYB19	-0.932354	0.00670915
PmGST3	PmMYB22	0.991594	0.000105686
PmGST3	PmMYB23	0.981374	0.000517168
PmGST3	PmMYB25	-0.980677	0.00055645
PmGST3	PmMYB26	-0.951702	0.00344268
PmGST3	PmMYB27	-0.958955	0.00249242
PmGST3	PmMYB3	-0.967783	0.00154022
PmGST3	PmMYB5	-0.981723	0.000497994
PmGST3	PmMYB7	-0.930916	0.00699398
PmGST3	PmMYB9	-0.977648	0.00074382
PmGST3	PmWRKY1	-0.978236	0.000705363
PmGST3	PmWRKY10	0.947063	0.00412933
PmGST3	PmWRKY16	-0.92366	0.00851927
PmGST3	PmWRKY17	0.959963	0.00237235
PmGST3	PmWRKY2	-0.974074	0.00099951
PmGST3	PmWRKY22	-0.960679	0.00228879
PmGST3	PmWRKY4	-0.977354	0.000763466
PmGST3	PmWRKY5	-0.979784	0.00060887
PmGT1	PmbHLH1	-0.977499	0.000753716
PmGT1	PmbHLH12	-0.945702	0.00434234
PmGT1	PmbHLH16	-0.957819	0.00263134
PmGT1	PmbHLH17	-0.956125	0.00284529
PmGT1	PmbHLH2	-0.939702	0.00534416
PmGT1	PmbHLH20	0.980481	0.000567777
PmGT1	PmbHLH23	-0.949854	0.0037089
PmGT1	PmbHLH3	-0.944664	0.00450832
PmGT1	PmbHLH4	0.931303	0.00691675
PmGT1	PmbHLH5	-0.94896	0.00384115
PmGT1	PmbHLH7	0.961706	0.00217154
PmGT1	PmbHLH9	0.960076	0.00235902
PmGT1	PmMYB1	0.941361	0.00505704
PmGT1	PmMYB11	-0.970619	0.00128217
PmGT1	PmMYB16	0.999041	1.37962e-06
PmGT1	PmMYB17	0.939646	0.00535397
PmGT1	PmMYB19	-0.935026	0.00619531
PmGT1	PmMYB22	0.9853	0.000322533
PmGT1	PmMYB23	0.972176	0.00115052
PmGT1	PmMYB25	-0.955838	0.00288233
PmGT1	PmMYB26	-0.961292	0.00221846
PmGT1	PmMYB27	-0.943604	0.00468116
PmGT1	PmMYB3	-0.952558	0.00332273
PmGT1	PmMYB4	0.938976	0.00547219
PmGT1	PmMYB5	-0.955028	0.00298818
PmGT1	PmMYB7	-0.920392	0.00925399
PmGT1	PmMYB9	-0.947339	0.00408682
PmGT1	PmWRKY1	-0.95065	0.00359308
PmGT1	PmWRKY10	0.978235	0.000705423
PmGT1	PmWRKY11	0.963597	0.00196363
PmGT1	PmWRKY16	-0.923205	0.00861977
PmGT1	PmWRKY2	-0.996482	1.85445e-05
PmGT1	PmWRKY22	-0.961061	0.00224483
PmGT1	PmWRKY4	-0.937761	0.00569006
PmGT1	PmWRKY5	-0.996615	1.71704e-05
PmGT2	PmbHLH1	-0.938146	0.00562062
PmGT2	PmbHLH10	0.980658	0.00055753
PmGT2	PmbHLH12	-0.978211	0.000706961
PmGT2	PmbHLH16	-0.978939	0.000660679
PmGT2	PmbHLH18	0.963031	0.00202479
PmGT2	PmbHLH2	-0.981704	0.000499043
PmGT2	PmbHLH20	0.95657	0.00278831
PmGT2	PmbHLH23	-0.969045	0.00142247
PmGT2	PmbHLH3	-0.943545	0.00469085
PmGT2	PmbHLH4	0.9852	0.000326958
PmGT2	PmbHLH5	-0.946623	0.00419757
PmGT2	PmbHLH7	0.941938	0.00495894
PmGT2	PmMYB1	0.956945	0.00274074
PmGT2	PmMYB10	-0.949553	0.0037531
PmGT2	PmMYB11	-0.95741	0.00268219
PmGT2	PmMYB12	-0.925326	0.00815613
PmGT2	PmMYB13	-0.948955	0.00384182
PmGT2	PmMYB16	0.922228	0.00883749
PmGT2	PmMYB17	0.977005	0.000787091
PmGT2	PmMYB18	-0.919374	0.00948884
PmGT2	PmMYB22	0.965804	0.00173409
PmGT2	PmMYB23	0.968807	0.00144437
PmGT2	PmMYB25	-0.965598	0.00175491
PmGT2	PmMYB26	-0.939901	0.00530935
PmGT2	PmMYB27	-0.965733	0.00174123
PmGT2	PmMYB3	-0.951648	0.00345037
PmGT2	PmMYB5	-0.981199	0.000526867
PmGT2	PmMYB7	-0.957044	0.00272813
PmGT2	PmMYB9	-0.982075	0.000479084
PmGT2	PmWRKY1	-0.96509	0.00180683
PmGT2	PmWRKY14	-0.924641	0.00830452
PmGT2	PmWRKY17	0.977495	0.000754002
PmGT2	PmWRKY2	-0.919277	0.00951122
PmGT2	PmWRKY22	-0.961674	0.0021752
PmGT2	PmWRKY4	-0.995615	2.87995e-05
PmGT2	PmWRKY5	-0.928192	0.00754943
PmGT2	PmWRKY6	0.925214	0.00818033
PmGT2	PmWRKY8	-0.948611	0.00389333
PmGT5	PmbHLH1	-0.968088	0.00151132
PmGT5	PmbHLH10	0.994376	4.73513e-05
PmGT5	PmbHLH12	-0.983639	0.000399355
PmGT5	PmbHLH14	0.929372	0.00730623
PmGT5	PmbHLH16	-0.985531	0.000312508
PmGT5	PmbHLH18	0.92426	0.00838767
PmGT5	PmbHLH2	-0.987907	0.00021848
PmGT5	PmbHLH20	0.981565	0.000506624
PmGT5	PmbHLH23	-0.985422	0.00031723
PmGT5	PmbHLH3	-0.964884	0.00182804
PmGT5	PmbHLH4	0.994353	4.7735e-05
PmGT5	PmbHLH5	-0.976105	0.000849605
PmGT5	PmbHLH7	0.977766	0.000736019
PmGT5	PmbHLH9	0.951144	0.00352203
PmGT5	PmMYB1	0.964512	0.00186679
PmGT5	PmMYB10	-0.982677	0.000447535
PmGT5	PmMYB11	-0.96617	0.00169737
PmGT5	PmMYB13	-0.974172	0.000991987
PmGT5	PmMYB16	0.948133	0.00396552
PmGT5	PmMYB17	0.996717	1.61478e-05
PmGT5	PmMYB18	-0.956771	0.00276277
PmGT5	PmMYB19	-0.93097	0.00698324
PmGT5	PmMYB22	0.978532	0.000686372
PmGT5	PmMYB23	0.989831	0.00015458
PmGT5	PmMYB25	-0.963431	0.00198148
PmGT5	PmMYB26	-0.939127	0.00544554
PmGT5	PmMYB27	-0.992818	7.71939e-05
PmGT5	PmMYB3	-0.940423	0.00521843
PmGT5	PmMYB5	-0.992633	8.12038e-05
PmGT5	PmMYB7	-0.942397	0.00488157
PmGT5	PmMYB9	-0.990563	0.000133157
PmGT5	PmWRKY1	-0.980195	0.000584483
PmGT5	PmWRKY10	0.951424	0.00348213
PmGT5	PmWRKY14	-0.955801	0.0028872
PmGT5	PmWRKY17	0.956338	0.00281794
PmGT5	PmWRKY2	-0.950622	0.00359714
PmGT5	PmWRKY22	-0.974712	0.000951136
PmGT5	PmWRKY4	-0.997331	1.06798e-05
PmGT5	PmWRKY5	-0.947199	0.00410825
PmGT5	PmWRKY6	0.959803	0.00239123
PmGT5	PmWRKY8	-0.945077	0.00444203
PmLAR	PmbHLH20	-0.929736	0.0072321
PmLAR	PmbHLH23	0.923842	0.00847915
PmLAR	PmMYB11	0.960827	0.00227178
PmLAR	PmMYB16	-0.958476	0.00255058
PmLAR	PmMYB22	-0.950292	0.00364491
PmLAR	PmMYB23	-0.917432	0.00994474
PmLAR	PmMYB25	0.966493	0.00166522
PmLAR	PmMYB26	0.975172	0.000916967
PmLAR	PmMYB3	0.937752	0.00569165
PmLAR	PmMYB5	0.926609	0.00788164
PmLAR	PmMYB7	0.943938	0.00462639
PmLAR	PmWRKY17	-0.922282	0.00882552
PmLAR	PmWRKY2	0.945759	0.00433327
PmLAR	PmWRKY22	0.94307	0.00476928
PmLAR	PmWRKY5	0.974559	0.000962622
