# Supplementary material for: Integration of Metabolomic and Transcriptomic Analyses Reveals the Molecular Mechanisms of Flower Color Formation in Prunus mume
Source: Plants (Basel). 2024 Apr 11;13(8):1077. doi: 10.3390/plants13081077 (PMC11054544; doi:10.3390/plants13081077)
Supplement: Supplementary file 1 [file plants-13-01077-s001.zip › Supplementary Table S8.xlsx]

## Sheet: Sheet1
Table S8: Correlation between anthocyanins and genes.
Anthocyanin	Gene	Correlation	P-value
Cyanidin 3-xyloside	PmbHLH10	0.991942	9.71414e-05
Cyanidin 3-xyloside	PmbHLH16	-0.99149	0.000108324
Cyanidin 3-xyloside	PmbHLH2	-0.990734	0.000128397
Cyanidin 3-xyloside	PmbHLH4	0.996696	1.63559e-05
Cyanidin 3-xyloside	PmGT5	0.997682	8.05562e-06
Cyanidin 3-xyloside	PmMYB17	0.995542	2.97702e-05
Cyanidin 3-xyloside	PmMYB23	0.993086	7.15484e-05
Cyanidin 3-xyloside	PmMYB5	-0.995033	3.69488e-05
Cyanidin 3-xyloside	PmMYB9	-0.993305	6.70794e-05
Cyanidin 3-xyloside	PmWRKY4	-0.997619	8.50022e-06
Cyanidin-3-O-(2''-O-glucosyl)rutinoside	PmbHLH10	0.991867	9.8949e-05
Cyanidin-3-O-(2''-O-glucosyl)rutinoside	PmbHLH16	-0.990114	0.000146104
Cyanidin-3-O-(2''-O-glucosyl)rutinoside	PmbHLH4	0.998145	5.16103e-06
Cyanidin-3-O-(2''-O-glucosyl)rutinoside	PmGT5	0.995168	3.49661e-05
Cyanidin-3-O-(2''-O-glucosyl)rutinoside	PmMYB17	0.991912	9.78701e-05
Cyanidin-3-O-(2''-O-glucosyl)rutinoside	PmMYB5	-0.993433	6.45405e-05
Cyanidin-3-O-(2''-O-glucosyl)rutinoside	PmMYB9	-0.991211	0.000115532
Cyanidin-3-O-(2''-O-glucosyl)rutinoside	PmWRKY4	-0.997166	1.20323e-05
Cyanidin-3-O-(6''-O-malonyl)glucoside	PmbHLH10	0.993721	5.90199e-05
Cyanidin-3-O-(6''-O-malonyl)glucoside	PmbHLH4	0.994254	4.94258e-05
Cyanidin-3-O-(6''-O-malonyl)glucoside	PmGT5	0.999957	2.8328e-09
Cyanidin-3-O-(6''-O-malonyl)glucoside	PmMYB17	0.996782	1.55198e-05
Cyanidin-3-O-(6''-O-malonyl)glucoside	PmMYB23	0.9908	0.000126584
Cyanidin-3-O-(6''-O-malonyl)glucoside	PmMYB27	-0.99291	7.5227e-05
Cyanidin-3-O-(6''-O-malonyl)glucoside	PmMYB5	-0.992853	7.64402e-05
Cyanidin-3-O-(6''-O-malonyl)glucoside	PmMYB9	-0.991528	0.000107355
Cyanidin-3-O-(6''-O-malonyl)glucoside	PmWRKY4	-0.997655	8.24347e-06
Cyanidin-3-O-galactoside*	PmbHLH10	0.995813	2.62587e-05
Cyanidin-3-O-galactoside*	PmbHLH4	0.996002	2.39457e-05
Cyanidin-3-O-galactoside*	PmGT2	0.992885	7.57608e-05
Cyanidin-3-O-galactoside*	PmGT5	0.994031	5.33315e-05
Cyanidin-3-O-galactoside*	PmWRKY4	-0.994399	4.69621e-05
Cyanidin-3-O-gentiobioside	PmbHLH10	0.995706	2.76151e-05
Cyanidin-3-O-gentiobioside	PmbHLH4	0.998146	5.15289e-06
Cyanidin-3-O-gentiobioside	PmGT2	0.991494	0.00010823
Cyanidin-3-O-gentiobioside	PmGT5	0.998446	3.62194e-06
Cyanidin-3-O-gentiobioside	PmMYB17	0.99457	4.41542e-05
Cyanidin-3-O-gentiobioside	PmMYB5	-0.992998	7.33771e-05
Cyanidin-3-O-gentiobioside	PmMYB9	-0.990439	0.000136687
Cyanidin-3-O-gentiobioside	PmWRKY4	-0.998171	5.01292e-06
Cyanidin-3-O-glucoside (Kuromanin)*	PmbHLH10	0.995813	2.62587e-05
Cyanidin-3-O-glucoside (Kuromanin)*	PmbHLH4	0.996002	2.39457e-05
Cyanidin-3-O-glucoside (Kuromanin)*	PmGT2	0.992885	7.57608e-05
Cyanidin-3-O-glucoside (Kuromanin)*	PmGT5	0.994031	5.33315e-05
Cyanidin-3-O-glucoside (Kuromanin)*	PmWRKY4	-0.994399	4.69621e-05
Pelargonidin-3-O-(6''-O-acetyl)glucoside	PmbHLH12	-0.990466	0.000135913
Pelargonidin-3-O-(6''-O-acetyl)glucoside	PmbHLH16	-0.992935	7.46925e-05
Pelargonidin-3-O-(6''-O-acetyl)glucoside	PmbHLH2	-0.990053	0.000147928
Pelargonidin-3-O-(6''-O-acetyl)glucoside	PmbHLH4	0.995771	2.6786e-05
Pelargonidin-3-O-(6''-O-acetyl)glucoside	PmGST3	0.991651	0.000104261
Pelargonidin-3-O-(6''-O-acetyl)glucoside	PmGT5	0.992674	8.03016e-05
Pelargonidin-3-O-(6''-O-acetyl)glucoside	PmMYB17	0.990983	0.00012159
Pelargonidin-3-O-(6''-O-acetyl)glucoside	PmMYB22	0.990026	0.000148713
Pelargonidin-3-O-(6''-O-acetyl)glucoside	PmMYB23	0.991239	0.000114795
Pelargonidin-3-O-(6''-O-acetyl)glucoside	PmMYB5	-0.993305	6.70755e-05
Pelargonidin-3-O-(6''-O-acetyl)glucoside	PmMYB9	-0.992293	8.88704e-05
Pelargonidin-3-O-(6''-O-acetyl)glucoside	PmWRKY4	-0.995108	3.58355e-05
Pelargonidin-3-O-glucoside	PmANR1	-0.990405	0.000137655
Pelargonidin-3-O-glucoside	PmbHLH12	-0.99043	0.000136943
Pelargonidin-3-O-glucoside	PmbHLH16	-0.993335	6.64911e-05
Pelargonidin-3-O-glucoside	PmbHLH2	-0.990658	0.000130496
Pelargonidin-3-O-glucoside	PmbHLH4	0.995133	3.54806e-05
Pelargonidin-3-O-glucoside	PmCHI	0.991305	0.000113066
Pelargonidin-3-O-glucoside	PmGT5	0.994371	4.74358e-05
Pelargonidin-3-O-glucoside	PmMYB17	0.994068	5.26829e-05
Pelargonidin-3-O-glucoside	PmMYB22	0.991569	0.000106333
Pelargonidin-3-O-glucoside	PmMYB23	0.994929	3.85061e-05
Pelargonidin-3-O-glucoside	PmMYB5	-0.994051	5.2978e-05
Pelargonidin-3-O-glucoside	PmMYB9	-0.99344	6.44118e-05
Pelargonidin-3-O-glucoside	PmWRKY4	-0.994718	4.17775e-05
Pelargonidin-3-O-rutinoside	PmANR1	-0.990493	0.000135158
Pelargonidin-3-O-rutinoside	PmbHLH10	0.991483	0.00010851
Pelargonidin-3-O-rutinoside	PmbHLH16	-0.991626	0.0001049
Pelargonidin-3-O-rutinoside	PmbHLH2	-0.990923	0.000123208
Pelargonidin-3-O-rutinoside	PmbHLH4	0.99537	3.21032e-05
Pelargonidin-3-O-rutinoside	PmCHI	0.991313	0.00011288
Pelargonidin-3-O-rutinoside	PmGT5	0.998036	5.78427e-06
Pelargonidin-3-O-rutinoside	PmMYB17	0.996928	1.41433e-05
Pelargonidin-3-O-rutinoside	PmMYB23	0.995185	3.47208e-05
Pelargonidin-3-O-rutinoside	PmMYB27	-0.992443	8.54435e-05
Pelargonidin-3-O-rutinoside	PmMYB5	-0.994643	4.29686e-05
Pelargonidin-3-O-rutinoside	PmMYB9	-0.993826	5.70516e-05
Pelargonidin-3-O-rutinoside	PmWRKY4	-0.99668	1.65176e-05
Peonidin-3-O-arabinoside	PmbHLH10	0.992519	8.37354e-05
Peonidin-3-O-arabinoside	PmbHLH16	-0.991697	0.000103111
Peonidin-3-O-arabinoside	PmbHLH2	-0.991328	0.000112468
Peonidin-3-O-arabinoside	PmbHLH4	0.996631	1.70094e-05
Peonidin-3-O-arabinoside	PmGT5	0.998032	5.80307e-06
Peonidin-3-O-arabinoside	PmMYB17	0.996507	1.82773e-05
Peonidin-3-O-arabinoside	PmMYB23	0.993622	6.08845e-05
Peonidin-3-O-arabinoside	PmMYB27	-0.990742	0.00012817
Peonidin-3-O-arabinoside	PmMYB5	-0.994411	4.67631e-05
Peonidin-3-O-arabinoside	PmMYB9	-0.993866	5.63173e-05
Peonidin-3-O-arabinoside	PmWRKY4	-0.997285	1.10503e-05
Peonidin-3-O-glucoside	PmANR1	-0.990201	0.000143573
Peonidin-3-O-glucoside	PmbHLH12	-0.990064	0.000147603
Peonidin-3-O-glucoside	PmbHLH16	-0.993401	6.51816e-05
Peonidin-3-O-glucoside	PmbHLH4	0.9931	7.12425e-05
Peonidin-3-O-glucoside	PmCHI	0.990092	0.000146765
Peonidin-3-O-glucoside	PmGST3	0.99402	5.354e-05
Peonidin-3-O-glucoside	PmGT5	0.990358	0.000139
Peonidin-3-O-glucoside	PmMYB22	0.993366	6.58635e-05
Peonidin-3-O-glucoside	PmMYB23	0.993337	6.64416e-05
Peonidin-3-O-glucoside	PmMYB5	-0.992779	7.80154e-05
Peonidin-3-O-glucoside	PmMYB9	-0.991754	0.00010171
Peonidin-3-O-glucoside	PmWRKY4	-0.992601	8.19088e-05
Peonidin-3-O-rutinoside	PmANR1	-0.992186	9.13538e-05
Peonidin-3-O-rutinoside	PmbHLH16	-0.993143	7.0357e-05
Peonidin-3-O-rutinoside	PmbHLH2	-0.990921	0.000123259
Peonidin-3-O-rutinoside	PmbHLH20	0.991507	0.000107884
Peonidin-3-O-rutinoside	PmbHLH4	0.993228	6.86354e-05
Peonidin-3-O-rutinoside	PmCHI	0.994187	5.05842e-05
Peonidin-3-O-rutinoside	PmGT5	0.995964	2.4402e-05
Peonidin-3-O-rutinoside	PmMYB17	0.995802	2.64009e-05
Peonidin-3-O-rutinoside	PmMYB22	0.992077	9.39128e-05
Peonidin-3-O-rutinoside	PmMYB23	0.997241	1.14113e-05
Peonidin-3-O-rutinoside	PmMYB27	-0.992053	9.44761e-05
Peonidin-3-O-rutinoside	PmMYB5	-0.994213	5.01434e-05
Peonidin-3-O-rutinoside	PmMYB9	-0.994153	5.11899e-05
Peonidin-3-O-rutinoside	PmWRKY4	-0.994977	3.77756e-05
