# Supplementary material for: Integration of Metabolomic and Transcriptomic Analyses Reveals the Molecular Mechanisms of Flower Color Formation in Prunus mume
Source: Plants (Basel). 2024 Apr 11;13(8):1077. doi: 10.3390/plants13081077 (PMC11054544; doi:10.3390/plants13081077)
Supplement: Supplementary file 1 [file plants-13-01077-s001.zip › Supplementary Table S9.xlsx]

## Sheet: Sheet1
Table S9：RT-qPCR primer sequence.
Gene Name	F (5’-3’)	R (5’-3’)
PmPP2A	AGGGTTCGGCTCGCAATAATAGA	TGTTAGCAGCAGCATCACGAAT
PmCHI	ATCCATACCAGAAGCCGGGAA	GAAACCCCATGCTTTCCCACG
PmFLS	TGGGCCTATCATCCCACTCA	AGCTGGCTTGACAGTGATCC
PmANR1	AAGACAGCCTGTGTGATCGG	TTGACGGCATAGCCCTTCTC
PmGT5	TGTCACCCTCGTCACCACT	TTTGGAGCCCGGATTCTACG
PmGST2	CGTGGCGCTCATTCCTTTTT	TCTCCAGGGACCTCTTAGCC
PmGST3	TGGTCCATGCATGTGAGGAG	AGTCACCAAATGCCCCAGTT
PmMYB23	GGCTCTTTGTGAGGCTCTGT	TGCGTAAGTGGAAGCTTGGT
PmLAR	GTGGACGACATCCGAACCAT	GGTAACTCTGGGAAGGGTGC
PmANS	TGAAGAAGGCAGCAGTGGAC	AGGCCTGGTCATTGGCATAC
PmbHLH4	CTCTCCAGGATTGCCAGGTA	TTTGTGGATGGGGCAACTCA
PmMYB22	CGATCGCCTCATTGCCTACA	TGCCACGTTTGAGATCAGGT
